# Supplementary material for: Fruit and vegetable consumption and the risk of type 2 diabetes: a systematic review and dose–response meta-analysis of prospective studies
Source: PubMed Central journal article supplement — BMJ Nutr Prev Health. 2021 Jul 2;4(2):519–31. doi: 10.1136/bmjnph-2020-000218 (PMC8718861; doi:10.1136/bmjnph-2020-000218), 2021-07-02
Supplement: bmjnph-2020-000218supp001.pdf [file bmjnph-2020-000218supp001.pdf]

## Supplemental Tables

**Supplemental Table 1.** Search strategy in PubMed

**Supplemental Table 2.** List of excluded studies and exclusion reason

**Supplemental Table 3.** Serving sizes

**Supplemental Table 4.** Cohort studies of fruit and vegetables and type 2 diabetes

**Supplemental Table 5.** Modified Newcastle-Ottawa Scale (NOS) assessment of the included cohort studies

### Nonlinear analyses

**Supplemental Table 6.** Relative risks (95% confidence intervals) from nonlinear analysis of fruit and vegetable intake and type 2 diabetes

**Supplemental Table 7.** Relative risks (95% confidence intervals) from nonlinear analysis of fruit and vegetable subtypes and type 2 diabetes

**Supplemental Table 8.** Relative risks (95% confidence intervals) from nonlinear analysis of fruit and vegetable subtypes and type 2 diabetes

**Supplemental Table 9.** Relative risks (95% confidence intervals) from nonlinear analysis of fruit and vegetable subtypes and type 2 diabetes

**Supplemental Table 10.** Relative risks (95% confidence intervals) from nonlinear analysis of fruit and vegetable subtypes and type 2 diabetes

**Supplemental Table 11.** Relative risks (95% confidence intervals) from nonlinear analysis of fruit and vegetable subtypes and type 2 diabetes

**Supplemental Table 12.** Relative risks (95% confidence intervals) from nonlinear analysis of potatoes and type 2 diabetes

**Supplemental Table 13.** Relative risks (95% confidence intervals) from nonlinear analysis of fruit juice and fruit drinks and type 2 diabetes

### Subgroup analyses

**Supplemental Table 14.** Subgroup analyses of fruit and vegetable intake and type 2 diabetes, high vs. low and dose-response

**Supplemental Table 15.** Subgroup analyses of fruit intake and type 2 diabetes, high vs. low and dose-response

**Supplemental Table 16.** Subgroup analyses of vegetable intake and type 2 diabetes, high vs. low and dose-response

**Supplemental Table 17.** Subgroup analyses of cruciferous vegetable intake and type 2 diabetes, dose-response

**Supplemental Table 18.** Subgroup analyses of green leafy vegetable intake and type 2 diabetes, dose-response

**Supplemental Table 19.** Subgroup analyses of potato (total) intake and type 2 diabetes, dose-response

**Supplemental Table 20.** World Cancer Research Fund grading criteria

**Supplemental Table 21.** Justification for evidence grading for fruit and vegetables and type 2 diabetes

**Supplemental Table 22.** Evidence grading for fruit and vegetables and subtypes and type 2 diabetes

**Supplemental Table 1.** Search strategy in PubMed

|                                                                                                                                                                         |
|-------------------------------------------------------------------------------------------------------------------------------------------------------------------------|
| 1. fruits                                                                                                                                                               |
| 2. vegetables                                                                                                                                                           |
| 3. fruit                                                                                                                                                                |
| 4. vegetable                                                                                                                                                            |
| 5. berry                                                                                                                                                                |
| 6. berries                                                                                                                                                              |
| 7. strawberries                                                                                                                                                         |
| 8. blueberries                                                                                                                                                          |
| 9. citrus                                                                                                                                                               |
| 10. "citrus fruits"                                                                                                                                                     |
| 11. orange                                                                                                                                                              |
| 12. apples                                                                                                                                                              |
| 13. pears                                                                                                                                                               |
| 14. banana                                                                                                                                                              |
| 15. cruciferae                                                                                                                                                          |
| 16. "cruciferous vegetables"                                                                                                                                            |
| 17. broccoli                                                                                                                                                            |
| 18. cauliflower                                                                                                                                                         |
| 19. cabbages                                                                                                                                                            |
| 20. "allium vegetables"                                                                                                                                                 |
| 21. onion                                                                                                                                                               |
| 22. garlic                                                                                                                                                              |
| 23. tomato                                                                                                                                                              |
| 24. tomatoes                                                                                                                                                            |
| 25. potato                                                                                                                                                              |
| 26. "french fries"                                                                                                                                                      |
| 27. juice                                                                                                                                                               |
| 28. food                                                                                                                                                                |
| 29. "food groups"                                                                                                                                                       |
| 30. (1 OR 2 OR 3 OR 4 OR 5 OR 6 OR 7 OR 8 OR 9 OR 10 OR 11 OR 12 OR 13 OR 14 OR 15 OR 16 OR 17 OR 18 OR 19 OR 20 OR 21 OR 22 OR 23 OR 24 OR 25 OR 26 OR 27 OR 28 OR 29) |
| 31. diabetes                                                                                                                                                            |
| 32. "case-control"                                                                                                                                                      |
| 33. cohort                                                                                                                                                              |
| 34. cohorts                                                                                                                                                             |
| 35. prospective                                                                                                                                                         |
| 36. longitudinal                                                                                                                                                        |
| 37. retrospective                                                                                                                                                       |
| 38. "follow-up"                                                                                                                                                         |
| 39. "cross-sectional"                                                                                                                                                   |
| 40. "population-based"                                                                                                                                                  |
| 41. "relative risk"                                                                                                                                                     |
| 42. "odds ratio"                                                                                                                                                        |
| 43. "hazard ratio"                                                                                                                                                      |
| 44. "incidence rate ratio"                                                                                                                                              |
| 45. (32 OR 33 OR 34 OR 35 OR 36 OR 37 OR 38 OR 39 OR 40 OR 41 OR 42 OR 43 OR 44)                                                                                        |
| 46. (30 AND 31 AND 45)                                                                                                                                                  |

**Supplemental Table 2. List of excluded studies and exclusion reason**

| Exclusion reason                      | Reference number |
|---------------------------------------|------------------|
| Abstract                              | (1-4)            |
| Case-control study                    | (5-8)            |
| Commentary                            | (9)              |
| Cross-sectional study                 | (10-55)          |
| Diabetes mortality                    | (56)             |
| Dietary pattern, dietary index        | (57-59)          |
| Duplicate                             | (60-70)          |
| Impaired glucose tolerance population | (71)             |
| Meta-analysis                         | (72-88)          |
| No risk estimates                     | (89-91)          |
| Not original data                     | (92;93)          |
| Not relevant data                     | (94-195)         |
| Not relevant exposure                 | (196-424)        |
| Not relevant outcome                  | (425-477)        |
| Only one study on exposure            | (478;479)        |
| Patient population                    | (480)            |
| Protocol                              | (481-483)        |
| Review                                | (484-517)        |
| Substitution of juice with water      | (518)            |
| Unadjusted risk estimates             | (519)            |
| Unspecific exposure (plant foods)     | (520)            |

## Reference List

- (1) Muraki I, Imamura F, Hu FB, Willett WC, Van DR, Sun Q. Consumption of specific fruits and incidence of type 2 diabetes in men and women. *Circulation Conference: American Heart Association's Epidemiology and Prevention/Physical Activity, Nutrition and Metabolism* 2013;No. suppl\_12(MP94):26.
- (2) Mursu J, Tuomainen T-P, Virtanen JK, Nurmi T, Voutilainen S. Intake of fruits, berries and vegetables and the risk of type 2 diabetes in finnish men: The kuopio ischaemic heart disease risk factor study. *Circulation Conference: American Heart Association's Epidemiology and Prevention/Physical Activity, Nutrition and Metabolism* 2013;127(suppl\_12):MP93.
- (3) OConnor L, Imamura F, Lentjes M, Khaw K-T, Wareham N, Forouhi N. Sweet beverage intake and type 2 diabetes. *Annals of Nutrition and Metabolism Conference: 12th European Nutrition Conference, FENS 2015*;67(Suppl 1):397-8.
- (4) Ma L, Liu G, Sampson L, Willett W, Hu F, Sun Q. Association of dietary glucosinolate with risk of type 2 diabetes in three large prospective cohorts. *Diabetes Conference: 77th Scientific Sessions of the American Diabetes Association, ADA* 2017;(Supplement 1):June.
- (5) Midhet FM, Al-Mohaimeed AA, Sharaf FK. Lifestyle related risk factors of type 2 diabetes mellitus in Saudi Arabia. *Saudi Med J* 2010 Jul;31(7):768-74.
- (6) Liu L, Chen L, Dai J, Chen J, Liang Y, Pei T, Huang Y. [Case-control study on the risk factors of type 2 diabetes of Dong nationality in Western Hunan]. *Zhong Nan Da Xue Xue Bao Yi Xue Ban* 2013 Oct;38(10):1057-64.
- (7) Ye Y-B, Lu W, Chen Y-M, Chen A-L, Li Y-B, Zhuo S-Y, Mai H-Y, Fang S. The association between dietary factors and the incident of type 2 diabetes: A case-control study. *Diabetes Conference: 74th Scientific Sessions of the American Diabetes Association San Francisco, CA United States Conference Publication* 2014;63 (Suppl. 1):A638.
- (8) Wang W, Shi L, Dong F. Analysis on the risk factors in patients with diabetes mellitus from population in mining districts--a population-based case-control study. [Chinese]. *Zhonghua liu xing bing xue za zhi = Zhonghua liuxingbingxue zazhi* 2019;(6):Dec.
- (9) Esposito K, Giugliano D. Increased consumption of green leafy vegetables, but not fruit, vegetables or fruit and vegetables combined, is associated with reduced incidence of type 2 diabetes. *Evidence-Based Medicine* 2011;16(1):27-8.
- (10) La Vecchia C, Decarli A, Pagano R. Vegetable consumption and risk of chronic disease. *Epidemiology* 1998 Mar;9(2):208-10.
- (11) Gittelsohn J, Wolever TM, Harris SB, Harris-Giraldo R, Hanley AJ, Zinman B. Specific patterns of food consumption and preparation are associated with diabetes and obesity in a Native Canadian community. *J Nutr* 1998 Mar;128(3):541-7.
- (12) Williams DE, Wareham NJ, Cox BD, Byrne CD, Hales CN, Day NE. Frequent salad vegetable consumption is associated with a reduction in the risk of diabetes mellitus. *J Clin Epidemiol* 1999 Apr;52(4):329-35.
- (13) Jorgensen ME, Bjeregaard P, Borch-Johnsen K. Diabetes and impaired glucose tolerance among the inuit population of Greenland. *Diabetes Care* 2002 Oct;25(10):1766-71.
- (14) McCulloch B, McDermott R, Miller G, Leonard D, Elwell M, Muller R. Self-reported diabetes and health behaviors in remote indigenous communities in northern queensland, australia. *Diabetes Care* 2003 Feb;26(2):397-403.
- (15) Reppert A, Steiner BF, Chapman-Novakofski K. Prevalence of metabolic syndrome and associated risk factors in Illinois. *Am J Health Promot* 2008 Nov;23(2):130-8.
- (16) Sartorelli DS, Franco LJ, Gimeno SG, Ferreira SR, Cardoso MA. Dietary fructose, fruits, fruit juices and glucose tolerance status in Japanese-Brazilians. *Nutr Metab Cardiovasc Dis* 2009 Feb;19(2):77-83.

- (17) Kasiam LO, Longo-Mbenza B, Nge OA, Kangola KN, Mbungu FS, Milongo DG. Classification and dramatic epidemic of diabetes mellitus in Kinshasa Hinterland: the prominent role of type 2 diabetes and lifestyle changes among Africans. *Niger J Med* 2009 Jul;18(3):311-20.
- (18) Nishimura RY, Damiao R, Gimeno SG, Ferreira SR, Sartorelli DS. [Food groups for the investigation of risk of type 2 diabetes and associated diseases]. *Rev Bras Epidemiol* 2011 Sep;14(3):531-6.
- (19) Harjo TC, Perez A, Lopez V, Wong ND. Prevalence of diabetes and cardiovascular risk factors among California Native American adults compared to other ethnicities: the 2005 California Health Interview Survey. *Metab Syndr Relat Disord* 2011 Feb;9(1):49-54.
- (20) Zhou X, Pang Z, Gao W, Wang S, Zhang L, Ning F, Xue B, Chen X, Qiao Q. Fresh vegetable intake and prevalence of diabetes in a Chinese population in Qingdao. *Diabetes Res Clin Pract* 2011 Apr;92(1):137-42.
- (21) Zhang J, Dong Z, Li G, Jiao SF, Xie J, Zhou Y, Zhao Y, Yang XW, Yang WN. [A cross-sectional study on risk factors of associated type 2 diabetes mellitus among adults in Beijing]. *Zhonghua Liu Xing Bing Xue Za Zhi* 2011 Apr;32(4):357-60.
- (22) Prasad DS, Kabir Z, Dash AK, Das BC. Prevalence and risk factors for diabetes and impaired glucose tolerance in Asian Indians: a community survey from urban eastern India. *Diabetes Metab Syndr* 2012 Apr;6(2):96-101.
- (23) Khosravi-Boroujeni H, Mohammadifard N, Sarrafzadegan N, Sajjadi F, Maghroun M, Khosravi A, Alikhasi H, Rafieian M, Azadbakht L. Potato consumption and cardiovascular disease risk factors among Iranian population. *Int J Food Sci Nutr* 2012 Dec;63(8):913-20.
- (24) Agrawal S, Ebrahim S. Prevalence and risk factors for self-reported diabetes among adult men and women in India: findings from a national cross-sectional survey. *Public Health Nutr* 2012 Jun;15(6):1065-77.
- (25) Chang J, Guy MC, Rosales C, de Zapien JG, Staten LK, Fernandez ML, Carvajal SC. Investigating social ecological contributors to diabetes within Hispanics in an underserved U.S.-Mexico border community. *Int J Environ Res Public Health* 2013 Jul 31;10(8):3217-32.
- (26) Tairea K, Kool B, Harries AD, Bissell K, Gounder S, Hill PC, Avare T, Fariu R. Characteristics of government workers and association with diabetes and hypertension in the Cook Islands. *Public Health Action* 2014 Jun 21;4(Suppl 1):S34-S38.
- (27) Pounis G, Costanzo S, Persichillo M, De CA, Sieri S, Vinceti M, Zito F, Di Castelnuovo AF, Donati MB, de GG, Iacoviello L. Mushroom and dietary selenium intakes in relation to fasting glucose levels in a free-living Italian adult population: the Moli-sani Project. *Diabetes Metab* 2014 Feb;40(1):34-42.
- (28) Tran DT, Jorm LR, Johnson M, Bambrick H, Lujic S. Prevalence and risk factors of type 2 diabetes in older Vietnam-born Australians. *J Community Health* 2014 Feb;39(1):99-107.
- (29) Yin Y, Han W, Wang Y, Zhang Y, Wu S, Zhang H, Jiang L, Wang R, Zhang P, Yu Y, Li B. Identification of Risk Factors Affecting Impaired Fasting Glucose and Diabetes in Adult Patients from Northeast China. *Int J Environ Res Public Health* 2015 Oct 12;12(10):12662-78.
- (30) Agrawal S. Frequency of Food Consumption and Self-reported Diabetes among Adult Men and Women in India: A Large Scale Nationally Representative Cross-sectional Study. *J Diabetes Metab* 2015 Jan 2;6(1):474.
- (31) Ishaque A, Shahzad F, Muhammad FH, Usman Y, Ishaque Z. Diabetes risk assessment among squatter settlements in Pakistan: A cross-sectional study. *Malays Fam Physician* 2016;11(2-3):9-15.
- (32) Kjollesdal M, Htet AS, Stigum H, Hla NY, Hlaing HH, Khaine EK, Khaing W, Khant AK, Khin NO, Mauk KK, Moe EE, Moe H, et al. Consumption of fruits and vegetables

- and associations with risk factors for non-communicable diseases in the Yangon region of Myanmar: a cross-sectional study. *BMJ Open* 2016 Aug 26;6(8):e011649.
- (33) Bernabe-Ortiz A, Carrillo-Larco RM, Gilman RH, Checkley W, Smeeth L, Miranda JJ. Contribution of modifiable risk factors for hypertension and type-2 diabetes in Peruvian resource-limited settings. *J Epidemiol Community Health* 2016 Jan;70(1):49-55.
- (34) Al-Shudifat AE, Al-Shdaifat A, Al-Abdoun AA, Aburoman MI, Otoum SM, Sweedan AG, Khrais I, bdel-Hafez IH, Johannessen A. Diabetes Risk Score in a Young Student Population in Jordan: A Cross-Sectional Study. *J Diabetes Res* 2017;2017:8290710.
- (35) Wang Y, Yu H, Zhang X, Feng Q, Guo X, Li S, Li R, Chu D, Ma Y. Evaluation of daily ginger consumption for the prevention of chronic diseases in adults: A cross-sectional study. *Nutrition* 2017 Apr;36:79-84.
- (36) Adaji EE, Ahankari AS, Myles PR. An Investigation to Identify Potential Risk Factors Associated with Common Chronic Diseases Among the Older Population in India. *Indian J Community Med* 2017 Jan;42(1):46-52.
- (37) Olivares DE, Chambi FR, Chani EM, Craig WJ, Pacheco SO, Pacheco FJ. Risk Factors for Chronic Diseases and Multimorbidity in a Primary Care Context of Central Argentina: A Web-Based Interactive and Cross-Sectional Study. *Int J Environ Res Public Health* 2017 Mar 2;14(3).
- (38) Liang J, Zhang Y, Xue A, Sun J, Song X, Xue B, Ji F, Gao W, He L, Pang Z, Qiao Q, Ning F. Association between fruit, vegetable, seafood, and dairy intake and a reduction in the prevalence of type 2 diabetes in Qingdao, China. *Asia Pac J Clin Nutr* 2017 Mar;26(2):255-61.
- (39) Siegel KR, Bullard KM, Imperatore G, Ali MK, Albright A, Mercado CI, Li R, Gregg EW. Prevalence of Major Behavioral Risk Factors for Type 2 Diabetes. *Diabetes Care* 2018 May;41(5):1032-9.
- (40) Musaiger AO, Al-Mannai MA. Social and lifestyle factors associated with diabetes in the adult Bahraini population. *J Biosoc Sci* 2002 Apr;34(2):277-81.
- (41) Suzuki K, Ito Y, Nakamura S, Ochiai J, Aoki K. Relationship between serum carotenoids and hyperglycemia: a population-based cross-sectional study. *Journal of epidemiology / Japan Epidemiological Association* 2002;12(5):357-66.
- (42) Sugiura M, Matsumoto H, Yano M. Cross-sectional analysis of Satsuma mandarin (*Citrus unshiu* Marc.) consumption and health status based on a self-administered questionnaires. *Journal of Health Science* 2002;48(4):366-9.
- (43) On'Kin JBKL, Longo-Mbenza B, Okwe N, Kabangu NK, Mpandamadi SD, Wemankoy O, He J. Prevalence and risk factors of diabetes mellitus in Kinshasa Hinterland. *International Journal of Diabetes and Metabolism* 2008;16(3):97-106.
- (44) Drewnowski A, Rehm CD, Beals KA. No association between white potatoes, (baked, boiled, or mashed) and systemic inflammation, obesity, or type II diabetes: Analysis of 2003-2006 National Health and Nutrition Examination Survey. *FASEB Journal Conference: Experimental Biology* 2012;April.
- (45) Xu X, Wu X, Deng Y, Ji K, Zhang N, Yi G, Cheng G. Study on non-communicable disease related lifestyle and behavior risk factors in west china. *Obesity Facts Conference: 22nd Congress of the European Congress on Obesity, ECO* 2015;8(Suppl 1):86-7.
- (46) Rawal LB, Biswas T, Khandker NN, Saha SR, Chowdhury MMB, Khan ANS, Chowdhury EH, Renzaho A. Non-communicable disease (NCD) risk factors and diabetes among adults living in slum areas of Dhaka, Bangladesh. *PLoS ONE* 2017;12(10):e0184967.
- (47) Wangdi K, Jamtsho T. Risk factors for self-reported diabetes among Bhutanese adults: A nationally representative survey data analysis. *PLoS One* 2018;13(11):e0206034.
- (48) Breuninger TA, Riedl A, Wawro N, Rathmann W, Strauch K, Quante A, Peters A, Thorand B, Meisinger C, Linseisen J. Differential associations between diet and prediabetes or diabetes in the KORA FF4 study. *J Nutr Sci* 2018;7:e34.



- (49) Zhou J, Sheng J, Fan Y, Zhu X, Wang S. Dietary patterns, dietary intakes and the risk of type 2 diabetes: results from the Hefei Nutrition and Health Study. *Int J Food Sci Nutr* 2019 Jun;70(4):412-20.
- (50) Ewers B, Trolle E, Jacobsen SS, Vististen D, Almdal TP, Vilsboll T, Bruun JM. Dietary habits and adherence to dietary recommendations in patients with type 1 and type 2 diabetes compared with the general population in Denmark. *Nutrition* 2019 May;61:49-55.
- (51) Julius JK, Fernandez CK, Grafa AC, Rosa PM, Hartos JL. Daily fruit and vegetable consumption and diabetes status in middle-aged females in the general US population. *SAGE Open Med* 2019;7:2050312119865116.
- (52) Miller C, Ettridge K, Wakefield M, Pettigrew S, Coveney J, Roder D, Durkin S, Wittert G, Martin J, Dono J. Consumption of sugar-sweetened beverages, juice, artificially-sweetened soda and bottled water: An Australian population study. *Nutrients* 2020;12(3):817.
- (53) Liu X, Li Y, Li L, Zhang L, Ren Y, Zhou H, Cui L, Mao Z, Hu D, Wang C. Prevalence, awareness, treatment, control of type 2 diabetes mellitus and risk factors in Chinese rural population: the RuralDiab study. *Sci Rep* 2016 Aug 11;6:31426.
- (54) Rees A, Thomas N, Brophy S, Knox G, Williams R. Cross sectional study of childhood obesity and prevalence of risk factors for cardiovascular disease and diabetes in children aged 11-13. *BMC Public Health* 2009 Mar 24;9:86.
- (55) Wu C, Liu P, Yuan Z. Fruit and vegetable intake is inversely associated with type 2 diabetes in Chinese women: results from the China Health and Nutrition Survey. *Int J Food Sci Nutr* 2020 Jun 17;1-11.
- (56) Hashemian M, Murphy G, Etemadi A, Liao LM, Dawsey SM, Malekzadeh R, Abnet CC. Potato consumption and the risk of overall and cause specific mortality in the NIH-AARP study. *PLoS One* 2019;14(5):e0216348.
- (57) Den Braver NR, Rutters F, van der Spek ALJK, Ibi D, Looman M, Geelen A, Elders P, van der Heijden AA, Brug J, Lakerveld J, Soedamah-Muthu SS, Beulens JWJ. Adherence to a food group-based dietary guideline and incidence of prediabetes and type 2 diabetes. *European Journal of Nutrition* 2019;doi: 10.1007/s00394-019-02064-8. [Epub ahead of print].
- (58) Ramezan M, Asghari G, Mirmiran P, Tahmasebinejad Z, Azizi F. Mediterranean dietary patterns and risk of type 2 diabetes in the Islamic Republic of Iran. *East Mediterr Health J* 2019 Dec 29;25(12):896-904.
- (59) O'Connor LE, Hu EA, Steffen LM, Selvin E, Rebholz CM. Adherence to a Mediterranean-style eating pattern and risk of diabetes in a U.S. prospective cohort study. *Nutr Diabetes* 2020 Mar 20;10(1):8.
- (60) Harding AH, Wareham NJ, Bingham SA, Khaw K, Luben R, Welch A, Forouhi NG. Plasma vitamin C level, fruit and vegetable consumption, and the risk of new-onset type 2 diabetes mellitus: the European prospective investigation of cancer--Norfolk prospective study. *Arch Intern Med* 2008 Jul 28;168(14):1493-9.
- (61) Odegaard AO, Koh WP, Arakawa K, Yu MC, Pereira MA. Soft drink and juice consumption and risk of physician-diagnosed incident type 2 diabetes: the Singapore Chinese Health Study. *Am J Epidemiol* 2010 Mar 15;171(6):701-8.
- (62) Pan A, Malik VS, Schulze MB, Manson JE, Willett WC, Hu FB. Plain-water intake and risk of type 2 diabetes in young and middle-aged women. *Am J Clin Nutr* 2012 Jun;95(6):1454-60.
- (63) Cooper AJ, Sharp SJ, Lentjes MA, Luben RN, Khaw KT, Wareham NJ, Forouhi NG. A prospective study of the association between quantity and variety of fruit and vegetable intake and incident type 2 diabetes. *Diabetes Care* 2012 Jun;35(6):1293-300.
- (64) Wedick NM, Pan A, Cassidy A, Rimm EB, Sampson L, Rosner B, Willett W, Hu FB, Sun Q, van Dam RM. Dietary flavonoid intakes and risk of type 2 diabetes in US men and women. *Am J Clin Nutr* 2012 Apr;95(4):925-33.

- (65) von RA, Feller S, Bergmann MM, Boeing H. Diet and risk of chronic diseases: results from the first 8 years of follow-up in the EPIC-Potsdam study. *Eur J Clin Nutr* 2013 Apr;67(4):412-9.
- (66) Stevens A, Hamel C, Singh K, Ansari MT, Myers E, Ziegler P, Hutton B, Sharma A, Bjerre LM, Fenton S, Gow R, Hadjiyannakis S, et al. Do sugar-sweetened beverages cause adverse health outcomes in children? A systematic review protocol. *Syst Rev* 2014 Sep 4;3:96.
- (67) O'Connor L, Imamura F, Lentjes MA, Khaw KT, Wareham NJ, Forouhi NG. Prospective associations and population impact of sweet beverage intake and type 2 diabetes, and effects of substitutions with alternative beverages. *Diabetologia* 2015 Jul;58(7):1474-83.
- (68) Mandalazi E, Drake I, Wirfalt E, Orho-Melander M, Sonestedt E. A High Diet Quality Based on Dietary Recommendations Is Not Associated with Lower Incidence of Type 2 Diabetes in the Malmo Diet and Cancer Cohort. *Int J Mol Sci* 2016 Jun 8;17(6).
- (69) Schulze MB, Manson JE, Ludwig DS, Colditz GA, Stampfer MJ, Willett WC, Hu FB. Sugar-sweetened beverages, weight gain, and incidence of type 2 diabetes in young and middle-aged women. *JAMA* 2004 Aug 25;292(8):927-34.
- (70) Halton TL, Willett WC, Liu S, Manson JE, Stampfer MJ, Hu FB. Potato and french fry consumption and risk of type 2 diabetes in women. *Am J Clin Nutr* 2006 Feb;83(2):284-90.
- (71) Teshima N, Shimo M, Miyazawa K, Konegawa S, Matsumoto A, Onishi Y, Sasaki R, Suzuki T, Yano Y, Matsumoto K, Yamada T, Gabazza EC, et al. Effects of sugar-sweetened beverage intake on the development of type 2 diabetes mellitus in subjects with impaired glucose tolerance: the Mihama diabetes prevention study. *J Nutr Sci Vitaminol (Tokyo)* 2015;61(1):14-9.
- (72) Hamer M, Chida Y. Intake of fruit, vegetables, and antioxidants and risk of type 2 diabetes: systematic review and meta-analysis. *J Hypertens* 2007 Dec;25(12):2361-9.
- (73) Malik VS, Popkin BM, Bray GA, Despres JP, Willett WC, Hu FB. Sugar-sweetened beverages and risk of metabolic syndrome and type 2 diabetes: a meta-analysis. *Diabetes Care* 2010 Nov;33(11):2477-83.
- (74) Carter P, Gray LJ, Troughton J, Khunti K, Davies MJ. Fruit and vegetable intake and incidence of type 2 diabetes mellitus: systematic review and meta-analysis. *BMJ* 2010 Aug 18;341:c4229.
- (75) Carter P, Troughton J, Gray L, Khunti K, Forouhi NG, Davies MJ. Increasing green leafy vegetable consumption can decrease the risk of type 2 diabetes. *Diabetic Medicine Conference: Diabetes UK Annual Professional Conference Liverpool United Kingdom Conference Publication* 2010;27 (2 Suppl. 1):109.
- (76) Li M, Fan Y, Zhang X, Hou W, Tang Z. Fruit and vegetable intake and risk of type 2 diabetes mellitus: meta-analysis of prospective cohort studies. *BMJ Open* 2014 Nov 5;4(11):e005497.
- (77) Xi B, Li S, Liu Z, Tian H, Yin X, Huai P, Tang W, Zhou D, Steffen LM. Intake of fruit juice and incidence of type 2 diabetes: a systematic review and meta-analysis. *PLoS One* 2014;9(3):e93471.
- (78) Wu Y, Zhang D, Jiang X, Jiang W. Fruit and vegetable consumption and risk of type 2 diabetes mellitus: a dose-response meta-analysis of prospective cohort studies. *Nutr Metab Cardiovasc Dis* 2015 Feb;25(2):140-7.
- (79) Li S, Miao S, Huang Y, Liu Z, Tian H, Yin X, Tang W, Steffen LM, Xi B. Fruit intake decreases risk of incident type 2 diabetes: an updated meta-analysis. *Endocrine* 2015 Mar;48(2):454-60.
- (80) Guo X, Yang B, Tan J, Jiang J, Li D. Associations of dietary intakes of anthocyanins and berry fruits with risk of type 2 diabetes mellitus: a systematic review and meta-analysis of prospective cohort studies. *Eur J Clin Nutr* 2016 Dec;70(12):1360-7.
- (81) Imamura F, O'Connor L, Ye Z, Mursu J, Hayashino Y, Bhupathiraju SN, Forouhi NG. Consumption of sugar sweetened beverages, artificially sweetened beverages, and fruit



- juice and incidence of type 2 diabetes: systematic review, meta-analysis, and estimation of population attributable fraction. *Br J Sports Med* 2016 Apr;50(8):496-504.
- (82) Wang PY, Fang JC, Gao ZH, Zhang C, Xie SY. Higher intake of fruits, vegetables or their fiber reduces the risk of type 2 diabetes: A meta-analysis. *J Diabetes Investig* 2016 Jan;7(1):56-69.
- (83) Jia X, Zhong L, Song Y, Hu Y, Wang G, Sun S. Consumption of citrus and cruciferous vegetables with incident type 2 diabetes mellitus based on a meta-analysis of prospective study. *Prim Care Diabetes* 2016 Aug;10(4):272-80.
- (84) Schwingshackl L, Hoffmann G, Lampousi AM, Knuppel S, Iqbal K, Schwedhelm C, Bechthold A, Schlesinger S, Boeing H. Food groups and risk of type 2 diabetes mellitus: a systematic review and meta-analysis of prospective studies. *Eur J Epidemiol* 2017 May;32(5):363-75.
- (85) Guo XF, Yang B, Tang J, Jiang JJ, Li D. Apple and pear consumption and type 2 diabetes mellitus risk: a meta-analysis of prospective cohort studies. *Food Funct* 2017 Mar 22;8(3):927-34.
- (86) Bidel Z, Teymoori F, Davari SJ, Nazarzadeh M. Potato consumption and risk of type 2 diabetes: A dose-response meta-analysis of cohort studies. *Clin Nutr ESPEN* 2018 Oct;27:86-91.
- (87) Zhang Y, You D, Lu N, Duan D, Feng X, stell-Burt T, Zhu P, Han L, Duan S, Zou Z. Potatoes Consumption and Risk of Type 2 Diabetes: A Meta-analysis. *Iran J Public Health* 2018 Nov;47(11):1627-35.
- (88) Liu M, Gao B-H, Lv B-Q, Qin C-L, Kou G-N. Citrus fruit intake decreases the risk of incident type 2 diabetes: A systematic review and meta-analysis. *Acta Medica Mediterranea* 34 (6) (pp 1743-1749), 2018;2018.
- (89) Colditz GA, Manson JE, Stampfer MJ, Rosner B, Willett WC, Speizer FE. Diet and risk of clinical diabetes in women. *Am J Clin Nutr* 1992 May;55(5):1018-23.
- (90) Feskens EJ, Virtanen SM, Rasanen L, Tuomilehto J, Stengard J, Pekkanen J, Nissinen A, Kromhout D. Dietary factors determining diabetes and impaired glucose tolerance. A 20-year follow-up of the Finnish and Dutch cohorts of the Seven Countries Study. *Diabetes Care* 1995 Aug;18(8):1104-12.
- (91) Andre P, Proctor G, Driollet B, Garcia-Esquinas E, Lopez-Garcia E, Gomez-Cabrero D, Neyraud E, Rodriguez-Artalejo F, Morzel M, Feart C. The role of overweight in the association between the Mediterranean diet and the risk of type 2 diabetes mellitus: a mediation analysis among 21 585 UK biobank participants. *Int J Epidemiol* 2020 Aug 4.
- (92) Micha R, Penalvo JL, Cudhea F, Imamura F, Rehm CD, Mozaffarian D. Association between dietary factors and mortality from heart disease, stroke, and type 2 diabetes in the United States. *JAMA - Journal of the American Medical Association* 2017;317(9):912-24.
- (93) Schwingshackl L, Knuppel S, Michels N, Schwedhelm C, Hoffmann G, Iqbal K, De HS, Boeing H, Devleeschauwer B. Intake of 12 food groups and disability-adjusted life years from coronary heart disease, stroke, type 2 diabetes, and colorectal cancer in 16 European countries. *Eur J Epidemiol* 2019 Apr 27;34(8):765-77.
- (94) az-Montiel JC, Halley E, Cuevas-George A, gado-Sanchez V, Huitron-Bravo G, rhundia-Cabanez HM, Salmeron J. Glycemic load and its association with metabolic syndrome among Mexican children and adolescents. *Journal of Diabetes Conference: 4th International Congress on Prediabetes and the Metabolic Syndrome Madrid Spain Conference Publication* 207;3 (Suppl. 1):April.
- (95) Khan N, Al-Daghri NM, Alkharfy KM, Al-Attas OS, Alokail MS, Alfawaz HA, Alothman AA, Vanhoutte PM. Selected dietary nutrients and the prevalence of metabolic syndrome in adult males and females in Saudi Arabia. *Annals of Nutrition and Metabolism Conference: 1920;(var.pagings):2013.*

- (96) Baptiste-Roberts K, Ghosh P, Nicholson WK. Pregravid physical activity, dietary intake, and glucose intolerance during pregnancy. *Journal of Women's Health* 1920;(12):01.
- (97) Ylonen K, Saloranta C, Kronberg-Kippila C, Groop L, Aro A, Virtanen SM. Associations of dietary fiber with glucose metabolism in nondiabetic relatives of subjects with type 2 diabetes: The Botnia Dietary Study. *Diabetes Care* 26 (7) (pp 1979;01.
- (98) Feskens EJ, Bowles CH, Kromhout D. Carbohydrate intake and body mass index in relation to the risk of glucose intolerance in an elderly population. *Am J Clin Nutr* 1991 Jul;54(1):136-40.
- (99) Pavan L, Casiglia E, Carvalho Braga LM, Winnicki M, Puato M, Pauletto P, Pessina AC. Effects of a traditional lifestyle on the cardiovascular risk profile: The Amondava population of the Brazilian Amazon. Comparison with matched African, Italian and Polish populations. *Journal of Hypertension* 1999;17(6):749-56.
- (100) Costa MB, Ferreira SR, Franco LJ, Gimeno SG, Iunes M. Dietary patterns in a high-risk population for glucose intolerance. Japanese-Brazilian Diabetes Study Group. *J Epidemiol* 2000 Mar;10(2):111-7.
- (101) van Dam RM, Visscher AWJ, Feskens EJM, Verhoef P, Kromhout D. Dietary glycemic index in relation to metabolic risk factors and incidence of coronary heart disease: The Zutphen elderly study. *European Journal of Clinical Nutrition* 2000;54(9):726-31.
- (102) Rao PV. Dietary patterns and glucose intolerance among rural Indian populations. *J Indian Med Assoc* 2002 Mar;100(3):137-40.
- (103) Kiyohara Y, Shinohara A, Kato I, Shiota T, Kubo M, Tanizaki Y, Fujishima M, Iida M. Dietary factors and development of impaired glucose tolerance and diabetes in a general Japanese population: the hisayama study. *J Epidemiol* 2003 Sep;13(5):251-8.
- (104) Ylonen K, Alfthan G, Groop L, Saloranta C, Aro A, Virtanen SM. Dietary intakes and plasma concentrations of carotenoids and tocopherols in relation to glucose metabolism in subjects at high risk of type 2 diabetes: The Botnia Dietary Study. *American Journal of Clinical Nutrition* 2003;77(6):1434-41.
- (105) Fung TT, Manson JE, Solomon CG, Liu S, Willett WC, Hu FB. The Association between Magnesium Intake and Fasting Insulin Concentration in Healthy Middle-Aged Women. *Journal of the American College of Nutrition* 2003;22(6):533-8.
- (106) Liese AD, Schulz M, Moore CG, Mayer-Davis EJ. Dietary patterns, insulin sensitivity and adiposity in the multi-ethnic Insulin Resistance Atherosclerosis Study population. *Br J Nutr* 2004 Dec;92(6):973-84.
- (107) Villegas R, Salim A, Flynn A, Perry IJ. Prudent diet and the risk of insulin resistance. *Nutr Metab Cardiovasc Dis* 2004 Dec;14(6):334-43.
- (108) Lau C, Faerch K, Glumer C, Tetens I, Pedersen O, Carstensen B, Jorgensen T, Borch-Johnsen K. Dietary glycemic index, glycemic load, fiber, simple sugars, and insulin resistance: the Inter99 study. *Diabetes Care* 2005 Jun;28(6):1397-403.
- (109) Damiao R, Castro TG, Cardoso MA, Gimeno SG, Ferreira SR. Dietary intakes associated with metabolic syndrome in a cohort of Japanese ancestry. *Br J Nutr* 2006 Sep;96(3):532-8.
- (110) Valachovicova M, Krajcovicova-Kudlackova M, Blazicek P, Babinska K. No evidence of insulin resistance in normal weight vegetarians. A case control study. *Eur J Nutr* 2006 Feb;45(1):52-4.
- (111) He K, Liu K, Daviglus ML, Morris SJ, Loria CM, Van HL, Jacobs DR, Jr., Savage PJ. Magnesium intake and incidence of metabolic syndrome among young adults. *Circulation* 2006 Apr 4;113(13):1675-82.
- (112) Zhang C, Schulze MB, Solomon CG, Hu FB. A prospective study of dietary patterns, meat intake and the risk of gestational diabetes mellitus. *Diabetologia* 2006 Nov;49(11):2604-13.
- (113) Mejean C, Traissac P, Eymard-Duvernay S, El AJ, Delpuech F, Maire B. Diet quality of North African migrants in France partly explains their lower prevalence of diet-

- related chronic conditions relative to their native French peers. *J Nutr* 2007 Sep;137(9):2106-13.
- (114) Esposito K, Ciotola M, Giugliano D. Mediterranean diet and the metabolic syndrome. *Mol Nutr Food Res* 2007 Oct;51(10):1268-74.
- (115) Radesky JS, Oken E, Rifas-Shiman SL, Kleinman KP, Rich-Edwards JW, Gillman MW. Diet during early pregnancy and development of gestational diabetes. *Paediatr Perinat Epidemiol* 2008 Jan;22(1):47-59.
- (116) Du H, van der AD, van Bakel MM, van der Kallen CJ, Blaak EE, van Greevenbroek MM, Jansen EH, Nijpels G, Stehouwer CD, Dekker JM, Feskens EJ. Glycemic index and glycemic load in relation to food and nutrient intake and metabolic risk factors in a Dutch population. *Am J Clin Nutr* 2008 Mar;87(3):655-61.
- (117) Nanri A, Mizoue T, Yoshida D, Takahashi R, Takayanagi R. Dietary patterns and A1C in Japanese men and women. *Diabetes Care* 2008;31(8):1568-73.
- (118) Ventura EE, Davis JN, Alexander KE, Shaibi GQ, Lee W, Byrd-Williams CE, Toledo-Corral CM, Lane CJ, Kelly LA, Weigensberg MJ, Goran MI. Dietary Intake and the Metabolic Syndrome in Overweight Latino Children. *Journal of the American Dietetic Association* 2008;108(8):1355-9.
- (119) Nam SM, Chung CH, Park JK, Ahn YJ, Shin YG, Shin JY, Sung JK, Koh SB, Kim MY, Lee MY, Kim SY. Relationship between retinol intake and metabolic syndrome in Korean Men: A report from Korean Genomic Rural Cohort (KGRC) study. *Diabetes Conference: 69th Annual Meeting of the American Diabetes Association New Orleans, LA United States Conference Publication* 2009;58 (SUPPL.1A).
- (120) O'Sullivan TA, Lyons-Wall P, Bremner AP, Ambrosini GL, Huang RC, Beilin LJ, Mori TA, Blair E, Oddy WH. Dietary glycaemic carbohydrate in relation to the metabolic syndrome in adolescents: comparison of different metabolic syndrome definitions. *Diabet Med* 2010 Jul;27(7):770-8.
- (121) Breneman C, Tucker L. Dietary fiber intake and insulin resistance in non-diabetic middle-age women. *Obesity Conference: 28th Annual Scientific Meeting of the Obesity Society, OBESITY 2010*;November.
- (122) Halley E, gado-Sanchez V, Borges G, az-Montiel JC, echundia-Cabanez H, Hernandez-Valero M, Bustamante-Montes P, Salmeron J. Lifestyle and metabolic syndrome among children and adolescents. *Diabetes, Obesity and Metabolism Conference: 1st International Diabetes and Obesity Forum Athens Greece Conference Publication* 2010;12 (SUPPL.1):62-3.
- (123) Jain V, Jose B, Vikram NK. Association of lower serum magnesium with overweight and insulin resistance in children and adolescents. *Pediatric Diabetes Conference: 36th Annual Meeting of the International Society for Pediatric and Adolescent Diabetes, ISPAD Buenos Aires Argentina Conference Publication* 2010;11 (SUPPL.14):55.
- (124) Pasalic D, Dodig S, Corovic N, Pizent A, Jurasovic J, Pavlovic M. High prevalence of metabolic syndrome in an elderly Croatian population - a multicentre study. *Public Health Nutr* 2011 Sep;14(9):1650-7.
- (125) Rizzo NS, Sabate J, Jaceldo-Siegl K, Fraser GE. Vegetarian dietary patterns are associated with a lower risk of metabolic syndrome: the adventist health study 2. *Diabetes Care* 2011 May;34(5):1225-7.
- (126) Aeberli I, Gerber PA, Hochuli M, Kohler S, Haile SR, Gouni-Berthold I, Berthold HK, Spinass GA, Berneis K. Low to moderate sugar-sweetened beverage consumption impairs glucose and lipid metabolism and promotes inflammation in healthy young men: a randomized controlled trial. *Am J Clin Nutr* 2011 Aug;94(2):479-85.
- (127) Kim J, Jo I. Grains, vegetables, and fish dietary pattern is inversely associated with the risk of metabolic syndrome in South Korean adults. *J Am Diet Assoc* 2011 Aug;111(8):1141-9.
- (128) Hosseinpour-Niazi S, Mirmiran P, Sohrab G, Hosseini-Esfahani F, Azizi F. Inverse association between fruit, legume, and cereal fiber and the risk of metabolic syndrome: Tehran Lipid and Glucose Study. *Diabetes Res Clin Pract* 2011 Nov;94(2):276-83.

- (129) Wong SS, Beth DL, Gilbride JA, Chin WW, Kwan TW. Diet, physical activity, and cardiovascular disease risk factors among older Chinese Americans living in New York City. *Journal of community health* 2011;36(3):446-55.
- (130) Sultana N, Rosy N, Jebunnesa F, Helal R, Ali L. Association of gestational diabetes mellitus with dietary intake of macroand micro-nutrients. *Diabetologia Conference: 47th Annual Meeting of the European Association for the Study of Diabetes, EASD 2011*;54(Suppl 1):S475 (Abstract 1179).
- (131) Kuroki Y, Kanauchi K, Kanauchi M. Adherence index to the American Heart Association Diet and Lifestyle Recommendation is associated with the metabolic syndrome in Japanese male workers. *Eur J Intern Med* 2012 Dec;23(8):e199-e203.
- (132) Kimokoti RW, Gona P, Zhu L, Newby PK, Millen BE, Brown LS, D'Agostino RB, Fung TT. Dietary patterns of women are associated with incident abdominal obesity but not metabolic syndrome. *J Nutr* 2012 Sep;142(9):1720-7.
- (133) Tobias DK, Zhang C, Chavarro J, Bowers K, Rich-Edwards J, Rosner B, Mozaffarian D, Hu FB. Prepregnancy adherence to dietary patterns and lower risk of gestational diabetes mellitus. *Am J Clin Nutr* 2012 Aug;96(2):289-95.
- (134) Mohamud WN, Ismail A, Khir AS, Ismail IS, Musa KI, Kadir KA, Kamaruddin NA, Yaacob NA, Mustafa N, Ali O, Isa SH, Bebakar WM. Prevalence of metabolic syndrome and its risk factors in adult Malaysians: results of a nationwide survey. *Diabetes Res Clin Pract* 2012 Apr;96(1):91-7.
- (135) Sommer C, Morkrid K, Mosdol A, Sletner L, Jenum AK, Birkeland KI. Prevalence of gestational diabetes by WHO and IADPSG criteria in women with four major dietary patterns: The STORK Grotuddalen study. *Diabetologia Conference: 48th Annual Meeting of the European Association for the Study of Diabetes, EASD 2012*;55 (Suppl 1):S363 (Abstract 882).
- (136) Al-Daghri NM, Khan N, Alkharfy KM, Al-Attas OS, Alokail MS, Alfawaz HA, Alothman A, Vanhoutte PM. Selected dietary nutrients and the prevalence of metabolic syndrome in adult males and females in Saudi Arabia: a pilot study. *Nutrients* 2013 Nov 19;5(11):4587-604.
- (137) Buscemi S, Nicolucci A, Mattina A, Rosafio G, Massenti FM, Lucisano G, Galvano F, Amodio E, Pellegrini F, Barile AM, Maniaci V, Grosso G, et al. Association of dietary patterns with insulin resistance and clinically silent carotid atherosclerosis in apparently healthy people. *Eur J Clin Nutr* 2013 Dec;67(12):1284-90.
- (138) Sahay RD, Couch SC, Missoni S, Sujoldzic A, Novokmet N, Durakovic Z, Rao MB, Milanovic SM, Vuletic S, Deka R, Rudan P. Dietary patterns in adults from an Adriatic Island of Croatia and their associations with metabolic syndrome and its components. *Coll Antropol* 2013 Jun;37(2):335-42.
- (139) Barrio-Lopez MT, Martinez-Gonzalez MA, Fernandez-Montero A, Beunza JJ, Zazpe I, Bes-Rastrollo M. Prospective study of changes in sugar-sweetened beverage consumption and the incidence of the metabolic syndrome and its components: the SUN cohort. *Br J Nutr* 2013 Nov 14;110(9):1722-31.
- (140) Naja F, Nasreddine L, Itani L, Adra N, Sibai AM, Hwalla N. Association between dietary patterns and the risk of metabolic syndrome among Lebanese adults. *Eur J Nutr* 2013 Feb;52(1):97-105.
- (141) Martinez-Gonzalez MA, Martin-Calvo N. The major European dietary patterns and metabolic syndrome. *Reviews in Endocrine and Metabolic Disorders* 2013;14(3):265-71.
- (142) Ferranti EP, Dunbar SB, Reilly CM, Foster JW, Guo Y. Diet quality and cardiometabolic risk status of women within five years following gestational diabetes. *Circulation Conference: American Heart Association 2013*;128(Suppl 22):A16141.
- (143) Nitescu M, Furtunescu FL, Otelea M, Streinu-Cercel A. Risk factors associated to metabolic syndrome in a young group of medical students from romania. *Journal of Diabetes Conference: 5th International Congress on Prediabetes and the Metabolic*



- Syndrome Early Interventions for Diabetes and Dysglycaemia Surgery in the Treatment of Obesity and Diabetes Vienna Austria Conference Publication 2013;5(S1):April.
- (144) Ventura DA, Fonseca VM, Ramos EG, Marinheiro LP, Souza RA, Chaves CR, Peixoto MV. Association between quality of the diet and cardiometabolic risk factors in postmenopausal women. *Nutr J* 2014 Dec 22;13(1):121.
- (145) Arisawa K, Uemura H, Yamaguchi M, Nakamoto M, Hiyoshi M, Sawachika F, Katsuura-Kamano S. Associations of dietary patterns with metabolic syndrome and insulin resistance: a cross-sectional study in a Japanese population. *J Med Invest* 2014;61(3-4):333-44.
- (146) Chan TF, Lin WT, Huang HL, Lee CY, Wu PW, Chiu YW, Huang CC, Tsai S, Lin CL, Lee CH. Consumption of sugar-sweetened beverages is associated with components of the metabolic syndrome in adolescents. *Nutrients* 2014 May 23;6(5):2088-103.
- (147) Lana A, Rodriguez-Artalejo F, Lopez-Garcia E. Consumption of sugar-sweetened beverages is positively related to insulin resistance and higher plasma leptin concentrations in men and nonoverweight women. *J Nutr* 2014 Jul;144(7):1099-105.
- (148) Buscemi S, Sprini D, Grosso G, Galvano F, Nicolucci A, Lucisano G, Massenti FM, Amodio E, Rini GB. Impact of lifestyle on metabolic syndrome in apparently healthy people. *Eat Weight Disord* 2014 Jun;19(2):225-32.
- (149) Song S, Lee JE, Song WO, Paik HY, Song Y. Carbohydrate intake and refined-grain consumption are associated with metabolic syndrome in the Korean adult population. *J Acad Nutr Diet* 2014 Jan;14(1):54-62.
- (150) Henderson M, Benedetti A, Gray-Donald K. Dietary composition and its associations with insulin sensitivity and insulin secretion in youth. *Br J Nutr* 2014 Feb;111(3):527-34.
- (151) Sayon-Orea C, Martinez-Gonzalez MA, Gea A, Flores-Gomez E, Basterra-Gortari FJ, Bes-Rastrollo M. Consumption of fried foods and risk of metabolic syndrome: the SUN cohort study. *Clin Nutr* 2014 Jun;33(3):545-9.
- (152) Zhang M, Zhu Y, Li P, Chang H, Wang X, Liu W, Zhang Y, Huang G. Associations between Dietary Patterns and Impaired Fasting Glucose in Chinese Men: A Cross-Sectional Study. *Nutrients* 2015 Sep 21;7(9):8072-89.
- (153) Sabate J, Wien M. A perspective on vegetarian dietary patterns and risk of metabolic syndrome. *Br J Nutr* 2015 Apr;113 Suppl 2:S136-S143.
- (154) Boucher AB, Adesanya EA, Owei I, Gilles AK, Ebenibo S, Wan J, Edeoga C, gogo-Jack S. Dietary habits and leisure-time physical activity in relation to adiposity, dyslipidemia, and incident dysglycemia in the pathobiology of prediabetes in a biracial cohort study. *Metabolism* 2015 Sep;64(9):1060-7.
- (155) Gadgil MD, Anderson CA, Kandula NR, Kanaya AM. Dietary patterns are associated with metabolic risk factors in South Asians living in the United States. *J Nutr* 2015 Jun;145(6):1211-7.
- (156) Pan SY, de GM, Aziz A, Morrison H. Relation of insulin resistance with social-demographics, adiposity and behavioral factors in non-diabetic adult Canadians. *J Diabetes Metab Disord* 2015;15:31.
- (157) Johnson-Down L, Labonte ME, Martin ID, Tsuji LJ, Nieboer E, Dewailly E, Egeland G, Lucas M. Quality of diet is associated with insulin resistance in the Cree (Eeyouch) indigenous population of northern Quebec. *Nutr Metab Cardiovasc Dis* 2015 Jan;25(1):85-92.
- (158) He J-R, Yuan M-Y, Chen N-N, Lu J-H, Hu C-Y, Mai W-B, Zhang R-F, Pan Y-H, Qiu L, Wu Y-F, Xiao W-Q, Liu Y, et al. Maternal dietary patterns and gestational diabetes mellitus: A large prospective cohort study in China. *British Journal of Nutrition* 2015;113(8):1292-300.
- (159) Bao W, Li S, Chavarro JE, Tobias DK, Zhu Y, Hu FB. Adherence to low-carbohydrate dietary pattern and long-term risk of type 2 diabetes among women with a history of gestational diabetes: A prospective cohort study. *Diabetes Conference: 75th Scientific*

- Sessions of the American Diabetes Association Boston, MA United States Conference Publication 2015;64 (Suppl. 1):A423.
- (160) Gutierrez-Pliego LE, Camarillo-Romero ES, Montenegro-Morales LP, Garduno-Garcia JJ. Dietary patterns associated with body mass index (BMI) and lifestyle in Mexican adolescents. *BMC Public Health* 2016 Aug 22;16(1):850.
- (161) Bagheri F, Siassi F, Koohdani F, Mahaki B, Qorbani M, Yavari P, Shaibu OM, Sotoudeh G. Healthy and unhealthy dietary patterns are related to pre-diabetes: a case-control study. *Br J Nutr* 2016 Sep;116(5):874-81.
- (162) Jaacks LM, Kapoor D, Singh K, Narayan KM, Ali MK, Kadir MM, Mohan V, Tandon N, Prabhakaran D. Vegetarianism and cardiometabolic disease risk factors: Differences between South Asian and US adults. *Nutrition* 2016 Sep;32(9):975-84.
- (163) Hlaing HH, Liabsuetrakul T. Dietary intake, food pattern, and abnormal blood glucose status of middle-aged adults: a cross-sectional community-based study in Myanmar. *Food Nutr Res* 2016;60:28898.
- (164) Doostvandi T, Bahadoran Z, Mozaffari-Khosravi H, Mirmiran P, Azizi F. Food intake patterns are associated with the risk of impaired glucose and insulin homeostasis: a prospective approach in the Tehran Lipid and Glucose Study. *Public Health Nutr* 2016 Sep;19(13):2467-74.
- (165) Xu SH, Qiao N, Huang JJ, Sun CM, Cui Y, Tian SS, Wang C, Liu XM, Zhang HX, Wang H, Liang J, Lu Q, et al. Gender Differences in Dietary Patterns and Their Association with the Prevalence of Metabolic Syndrome among Chinese: A Cross-Sectional Study. *Nutrients* 2016 Mar 25;8(4):180.
- (166) Langsetmo L, Barr SI, Dasgupta K, Berger C, Kovacs CS, Josse RG, Adachi JD, Hanley DA, Prior JC, Brown JP, Morin SN, Davison KS, et al. Dietary patterns in men and women are simultaneously determinants of altered glucose metabolism and bone metabolism. *Nutr Res* 2016 Apr;36(4):328-36.
- (167) Burrows R, Correa-Burrows P, Reyes M, Blanco E, Albala C, Gahagan S. High cardiometabolic risk in healthy Chilean adolescents: associations with anthropometric, biological and lifestyle factors. *Public Health Nutr* 2016 Feb;19(3):486-93.
- (168) Hong X, Xu F, Wang Z, Liang Y, Li J. Dietary patterns and the incidence of hyperglycemia in China. *Public Health Nutr* 2016 Jan;19(1):131-41.
- (169) de SJ, Chia A, Colega M, Jones B, McKenzie E, Shirong C, Godfrey K, Kwek K, Saw S-M, Conlon C, Chong Y-S, Baker P, et al. Maternal dietary patterns and gestational diabetes mellitus in a multi-ethnic Asian cohort: The GUSTO study. *Nutrients* 8 (9) (no pagination), 2016;574.
- (170) Wang L, Yu D, Wang M-F, Cheng B, Sun M. Diet and body composition of overweight and obese patients. [Chinese]. *Chinese Journal of Clinical Nutrition* 2016;24(2):96-100.
- (171) Sedaghat F, Akhoondan M, Ehteshami M, Aghamohammadi V, Ghanei N, Mirmiran P, Rashidkhani B. Maternal Dietary Patterns and Gestational Diabetes Risk: A Case-Control Study. *J Diabetes Res* 2017;2017:5173926.
- (172) DU HY, Jiang H, O K, Chen B, Xu LJ, Liu SP, Yi JP, He GS, Qian X. Association of Dietary Pattern during Pregnancy and Gestational Diabetes Mellitus: A Prospective Cohort Study in Northern China. *Biomed Environ Sci* 2017 Dec;30(12):887-97.
- (173) Zhao HY, Yang J, Sun F, Yang XH, Yang ZR, Wang SF, Zhan SY. [Risk and related factors on metabolic syndrome among people who had received screening on physical check-up programs, in China]. *Zhonghua Liu Xing Bing Xue Za Zhi* 2017 Dec 10;38(12):1591-7.
- (174) Rashidipour-Fard N, Karimi M, Saraf-Bank S, Baghaei MH, Haghghatdoost F, Azadbakht L. Healthy eating index and cardiovascular risk factors among Iranian elderly individuals. *ARYA Atheroscler* 2017 Mar;13(2):56-65.
- (175) Wang Z, Adair LS, Cai J, Gordon-Larsen P, Siega-Riz AM, Zhang B, Popkin BM. Diet Quality Is Linked to Insulin Resistance among Adults in China. *J Nutr* 2017 Nov;147(11):2102-8.



- (176) Donazar-Ezcurra M, Lopez-Del BC, Martinez-Gonzalez MA, Basterra-Gortari FJ, de IJ, Bes-Rastrollo M. Pre-pregnancy adherences to empirically derived dietary patterns and gestational diabetes risk in a Mediterranean cohort: the Seguimiento Universidad de Navarra (SUN) project. *Br J Nutr* 2017 Nov;118(9):715-21.
- (177) Azzini E, Venneria E, Ciarapica D, Foddai MS, Intorre F, Zaccaria M, Maiani F, Palomba L, Barnaba L, Tubili C, Maiani G, Polito A. Effect of Red Orange Juice Consumption on Body Composition and Nutritional Status in Overweight/Obese Female: A Pilot Study. *Oxid Med Cell Longev* 2017;2017:1672567.
- (178) Mazidi M, Pennathur S, Afshinnia F. Link of dietary patterns with metabolic syndrome: analysis of the National Health and Nutrition Examination Survey. *Nutr Diabetes* 2017 Mar 20;7(3):e255.
- (179) Chikowore T, Pisa PT, van ZT, Feskens EJ, Wentzel-Viljoen E, Conradie KR. Nutrient Patterns Associated with Fasting Glucose and Glycated Haemoglobin Levels in a Black South African Population. *Nutrients* 2017 Jan 19;9(1):9.
- (180) Saraf-Bank S, Haghghatdoost F, Esmailzadeh A, Larijani B, Azadbakht L. Adherence to Healthy Eating Index-2010 is inversely associated with metabolic syndrome and its features among Iranian adult women. *Eur J Clin Nutr* 2017 Mar;71(3):425-30.
- (181) Schoufour J, Voortman T, Kieft-De JJ, Franco O. Adherence to the 2015 DUTCH dietary guidelines and its associations with mortality and incidence of non-communicable diseases in the rotterdam study. *Annals of Nutrition and Metabolism Conference: 21st International Congress of Nutrition, ICN 2017;71(Suppl 2)(Supplement 2):355 (144/1780)*.
- (182) Malgorzata Elzbieta Zujko ME, Witkowska AM, Waskiewicz A, Szczesniewska D, Kwasniewska M. Dietary antioxidant potential and polyphenol intake, and prevalence of metabolic syndrome in Polish adults of the WOBASZ II study. *European Journal of Preventive Cardiology Conference: EuroPREvent 2017;(1 Supplement 1):April*.
- (183) Mijatovic-Vukas J, Capling L, Cheng S, Stamatakis E, Louie J, Cheung NW, Markovic T, Ross G, Senior A, Brand-Miller JC, Flood VM. Associations of Diet and Physical Activity with Risk for Gestational Diabetes Mellitus: A Systematic Review and Meta-Analysis. *Nutrients* 2018 May 30;10(6).
- (184) Gicevic S, Gaskins AJ, Fung TT, Rosner B, Tobias DK, Isanaka S, Willett WC. Evaluating pre-pregnancy dietary diversity vs. dietary quality scores as predictors of gestational diabetes and hypertensive disorders of pregnancy. *PLoS One* 2018;13(4):e0195103.
- (185) Penczynski KJ, Herder C, Krupp D, Rienks J, Egert S, Wudy SA, Roden M, Remer T, Buyken AE. Flavonoid intake from fruit and vegetables during adolescence is prospectively associated with a favourable risk factor profile for type 2 diabetes in early adulthood. *Eur J Nutr* 2018 Feb 21.
- (186) Shridhar K, Satija A, Dhillon PK, Agrawal S, Gupta R, Bowen L, Kinra S, Bharathi AV, Prabhakaran D, Srinath RK, Ebrahim S. Association between empirically derived dietary patterns with blood lipids, fasting blood glucose and blood pressure in adults - the India migration study. *Nutr J* 2018 Feb 8;17(1):15.
- (187) Syauqy A, Hsu CY, Rau HH, Chao JC. Association of Dietary Patterns with Components of Metabolic Syndrome and Inflammation among Middle-Aged and Older Adults with Metabolic Syndrome in Taiwan. *Nutrients* 2018 Jan 29;10(2):143.
- (188) Vicinanza R, Troisi G, Cangemi R, De Martino MU, Pastori D, Bernardini S, Crisciotti F, Di VF, Frizza A, Cacciafesta M, Pignatelli P, Marigliano V. Aging and Adherence to the Mediterranean Diet: Relationship with Cardiometabolic Disorders and Polypharmacy. *J Nutr Health Aging* 2018;22(1):73-81.
- (189) Howard BV, Aragaki AK, Tinker LF, Allison M, Hingle MD, Johnson KC, Manson JE, Shadyab AH, Shikany JM, Snetselaar LG, Thomson CA, Zaslavsky O, et al. A Low-Fat Dietary Pattern and Diabetes: A Secondary Analysis From the Women's Health Initiative Dietary Modification Trial. *Diabetes Care* 2018 Apr;41(4):680-7.

- (190) Robles-Ordaz MD, Gallegos-Aguilar AC, Urquidez-Romero R, az-Zavala RG, Lavandera-Torres MG, Esparza-Romero J. Prevalence of prediabetes and modifiable factors in an ethnic group of Mexico: the Comcaac Project. *Public Health Nutr* 2018 Feb;21(2):333-8.
- (191) Lundgren H, Bengtsson C, Blohme G, Isaksson B, Lapidus L, Lenner RA, Saaek A, Winther E. Dietary habits and incidence of noninsulin-dependent diabetes mellitus in a population study of women in Gothenburg, Sweden. *Am J Clin Nutr* 1989 Apr;49(4):708-12.
- (192) Williams DE, Prevost AT, Whichelow MJ, Cox BD, Day NE, Wareham NJ. A cross-sectional study of dietary patterns with glucose intolerance and other features of the metabolic syndrome. *Br J Nutr* 2000 Mar;83(3):257-66.
- (193) Yu Z, Ley SH, Sun Q, Hu FB, Malik VS. Cross-sectional association between sugar-sweetened beverage intake and cardiometabolic biomarkers in US women. *Br J Nutr* 2018 Mar;119(5):570-80.
- (194) Overby NC, Sonestedt E, Laaksonen DE, Birgisdottir BE. Dietary fiber and the glycemic index: a background paper for the Nordic Nutrition Recommendations 2012. *Food Nutr Res* 2013;57.
- (195) van Dam RM, Naidoo N, Landberg R. Dietary flavonoids and the development of type 2 diabetes and cardiovascular diseases: review of recent findings. *Curr Opin Lipidol* 2013 Feb;24(1):25-33.
- (196) Ye X, Li H, Sun L, Lu L, Lin X. Higher dietary quality is associated with lower risk for type 2 diabetes in a middleaged and older chinese population. *Annals of Nutrition and Metabolism Conference: 1920;(var.pagings):2013*.
- (197) McEvoy C, Cardwell C, Woodside J, Young I, Hunter S, McKinley M. A systematic review and meta-analysis examining 'a posteriori' dietary patterns and risk of type 2 diabetes. *Annals of Nutrition and Metabolism Conference: 1920;(var.pagings):2013*.
- (198) Pan X-R, Yang W-Y, Li G-W, Liu J. Prevalence of diabetes and its risk factors in China, 1994. *Diabetes Care* 1920;(11):November.
- (199) Snowdon DA, Phillips RL. Does a vegetarian diet reduce the occurrence of diabetes? *Am J Public Health* 1985 May;75(5):507-12.
- (200) Kritchevsky D. The role of dietary fiber in health and disease. *J Environ Pathol Toxicol Oncol* 1986 Mar;6(3-4):273-84.
- (201) Dahlquist GG, Blom LG, Persson LA, Sandstrom AI, Wall SG. Dietary factors and the risk of developing insulin dependent diabetes in childhood. *BMJ* 1990 May 19;300(6735):1302-6.
- (202) Marshall JA, Weiss NS, Hamman RF. The role of dietary fiber in the etiology of non-insulin-dependent diabetes mellitus. The San Luis Valley Diabetes Study. *Ann Epidemiol* 1993 Jan;3(1):18-26.
- (203) Salmeron J, Manson JE, Stampfer MJ, Colditz GA, Wing AL, Willett WC. Dietary fiber, glycemic load, and risk of non-insulin-dependent diabetes mellitus in women. *JAMA* 1997 Feb 12;277(6):472-7.
- (204) Salmeron J, Ascherio A, Rimm EB, Colditz GA, Spiegelman D, Jenkins DJ, Stampfer MJ, Wing AL, Willett WC. Dietary fiber, glycemic load, and risk of NIDDM in men. *Diabetes Care* 1997 Apr;20(4):545-50.
- (205) Lerman IG, Villa AR, Martinez CL, Turrubiatez LC, Salinas CAA, Wong B, Gomez Perez FJ, Robledo LMG. The prevalence of diabetes and associated coronary risk factors in urban and rural older Mexican populations. *Journal of the American Geriatrics Society* 1998;46(11):1387-95.
- (206) Williams DE, Knowler WC, Smith CJ, Hanson RL, Roumain J, Saremi A, Kriska AM, Bennett PH, Nelson RG. The effect of Indian or Anglo dietary preference on the incidence of diabetes in Pima Indians. *Diabetes Care* 2001;24(5):811-6.
- (207) van Dam RM, Rimm EB, Willett WC, Stampfer MJ, Hu FB. Dietary patterns and risk for type 2 diabetes mellitus in U.S. men. *Ann Intern Med* 2002 Feb 5;136(3):201-9.

- (208) Abidoye RO, Izunwa RD, Akinkuade FO, Abidoye GO. Inter-relationships between lifestyle and diabetes mellitus, overweight/obesity and hypertension in Nigeria. *Nutr Health* 2002;16(3):203-13.
- (209) Stevens J, Ahn K, Juhaeri, Houston D, Steffan L, Couper D. Dietary fiber intake and glycemic index and incidence of diabetes in African-American and white adults: The ARIC study. *Diabetes Care* 2002;25(10):1715-21.
- (210) Song Y, Manson JE, Buring JE, Liu S. Dietary magnesium intake in relation to plasma insulin levels and risk of type 2 diabetes in women. *Diabetes Care* 2004 Jan;27(1):59-65.
- (211) Lopez-Ridaura R, Willett WC, Rimm EB, Liu S, Stampfer MJ, Manson JE, Hu FB. Magnesium intake and risk of type 2 diabetes in men and women. *Diabetes Care* 2004 Jan;27(1):134-40.
- (212) Montonen J, Knekt P, Jarvinen R, Reunanen A. Dietary antioxidant intake and risk of type 2 diabetes. *Diabetes Care* 2004 Feb;27(2):362-6.
- (213) McKeown NM, Meigs JB, Liu S, Saltzman E, Wilson PW, Jacques PF. Carbohydrate nutrition, insulin resistance, and the prevalence of the metabolic syndrome in the Framingham Offspring Cohort. *Diabetes Care* 2004 Feb;27(2):538-46.
- (214) Parillo M, Riccardi G. Diet composition and the risk of type 2 diabetes: epidemiological and clinical evidence. *Br J Nutr* 2004 Jul;92(1):7-19.
- (215) Schulze MB, Liu S, Rimm EB, Manson JE, Willett WC, Hu FB. Glycemic index, glycemic load, and dietary fiber intake and incidence of type 2 diabetes in younger and middle-aged women. *Am J Clin Nutr* 2004 Aug;80(2):348-56.
- (216) Fung TT, Schulze M, Manson JE, Willett WC, Hu FB. Dietary patterns, meat intake, and the risk of type 2 diabetes in women. *Arch Intern Med* 2004 Nov 8;164(20):2235-40.
- (217) Montonen J, Knekt P, Harkanen T, Jarvinen R, Heliovaara M, Aromaa A, Reunanen A. Dietary patterns and the incidence of type 2 diabetes. *Am J Epidemiol* 2005 Feb 1;161(3):219-27.
- (218) Heidemann C, Hoffmann K, Spranger J, Klipstein-Grobusch K, Mohlig M, Pfeiffer AF, Boeing H. A dietary pattern protective against type 2 diabetes in the European Prospective Investigation into Cancer and Nutrition (EPIC)--Potsdam Study cohort. *Diabetologia* 2005 Jun;48(6):1126-34.
- (219) Schulze MB, Hoffmann K, Manson JE, Willett WC, Meigs JB, Weikert C, Heidemann C, Colditz GA, Hu FB. Dietary pattern, inflammation, and incidence of type 2 diabetes in women. *Am J Clin Nutr* 2005 Sep;82(3):675-84.
- (220) Coyne T, Ibiebele TI, Baade PD, Dobson A, McClintock C, Dunn S, Leonard D, Shaw J. Diabetes mellitus and serum carotenoids: findings of a population-based study in Queensland, Australia. *Am J Clin Nutr* 2005 Sep;82(3):685-93.
- (221) Wang JL, Shaw NS, Yeh HY, Kao MD. Magnesium status and association with diabetes in the Taiwanese elderly. *Asia Pac J Clin Nutr* 2005;14(3):263-9.
- (222) Panagiotakos DB, Pitsavos C, Chrysohou C, Stefanadis C. The epidemiology of Type 2 diabetes mellitus in Greek adults: the ATTICA study. *Diabet Med* 2005 Nov;22(11):1581-8.
- (223) Sanchez-Villegas A. Mediterranean Diet and health. [Spanish]. *Revista Espanola de Obesidad* 2005;3(6):317-27.
- (224) Paynter NP, Yeh HC, Voutilainen S, Schmidt MI, Heiss G, Folsom AR, Brancati FL, Kao WH. Coffee and sweetened beverage consumption and the risk of type 2 diabetes mellitus: the atherosclerosis risk in communities study. *Am J Epidemiol* 2006 Dec 1;164(11):1075-84.
- (225) van Dam RM, Hu FB, Rosenberg L, Krishnan S, Palmer JR. Dietary calcium and magnesium, major food sources, and risk of type 2 diabetes in U.S. black women. *Diabetes Care* 2006 Oct;29(10):2238-43.
- (226) Bo S, Durazzo M, Guidi S, Carello M, Sacerdote C, Silli B, Rosato R, Cassader M, Gentile L, Pagano G. Dietary magnesium and fiber intakes and inflammatory and

- metabolic indicators in middle-aged subjects from a population-based cohort. *Am J Clin Nutr* 2006 Nov;84(5):1062-9.
- (227) Hodge AM, English DR, O'Dea K, Giles GG. Dietary patterns and diabetes incidence in the Melbourne Collaborative Cohort Study. *Am J Epidemiol* 2007 Mar 15;165(6):603-10.
- (228) Fung TT, McCullough M, van Dam RM, Hu FB. A prospective study of overall diet quality and risk of type 2 diabetes in women. *Diabetes Care* 2007 Jul;30(7):1753-7.
- (229) Panagiotakos DB, Polystipioti A, Papairakleous N, Polychronopoulos E. Long-term adoption of a Mediterranean diet is associated with a better health status in elderly people; a cross-sectional survey in Cyprus. *Asia Pac J Clin Nutr* 2007;16(2):331-7.
- (230) Schulze MB, Schulz M, Heidemann C, Schienkiewitz A, Hoffmann K, Boeing H. Fiber and magnesium intake and incidence of type 2 diabetes: a prospective study and meta-analysis. *Arch Intern Med* 2007 May 14;167(9):956-65.
- (231) Larsson SC, Wolk A. Magnesium intake and risk of type 2 diabetes: a meta-analysis. *J Intern Med* 2007 Aug;262(2):208-14.
- (232) Barclay AW, Flood VM, Roachchina E, Mitchell P, Brand-Miller JC. Glycemic index, dietary fiber, and risk of type 2 diabetes in a cohort of older Australians. *Diabetes Care* 2007 Nov;30(11):2811-3.
- (233) Mosdol A, Witte DR, Frost G, Marmot MG, Brunner EJ. Dietary glycemic index and glycemic load are associated with high-density-lipoprotein cholesterol at baseline but not with increased risk of diabetes in the Whitehall II study. *Am J Clin Nutr* 2007 Oct;86(4):988-94.
- (234) Krishnan S, Rosenberg L, Singer M, Hu FB, Djousse L, Cupples LA, Palmer JR. Glycemic index, glycemic load, and cereal fiber intake and risk of type 2 diabetes in US black women. *Archives of Internal Medicine* 167 (21) (pp 2304-2309), 2007;26.
- (235) Schulze MB, Schulz M, Heidemann C, Schienkiewitz A, Hoffmann K, Boeing H. Carbohydrate intake and incidence of type 2 diabetes in the European Prospective Investigation into Cancer and Nutrition (EPIC)-Potsdam Study. *Br J Nutr* 2008 May;99(5):1107-16.
- (236) Sahyoun NR, Anderson AL, Tylavsky FA, Lee JS, Sellmeyer DE, Harris TB. Dietary glycemic index and glycemic load and the risk of type 2 diabetes in older adults. *Am J Clin Nutr* 2008 Jan;87(1):126-31.
- (237) Barclay AW, Petocz P, Millan-Price J, Flood VM, Prvan T, Mitchell P, Brand-Miller JC. Glycemic index, glycemic load, and chronic disease risk--a meta-analysis of observational studies. *Am J Clin Nutr* 2008 Mar;87(3):627-37.
- (238) McNaughton SA, Mishra GD, Brunner EJ. Dietary patterns, insulin resistance, and incidence of type 2 diabetes in the Whitehall II Study. *Diabetes Care* 2008 Jul;31(7):1343-8.
- (239) Brunner EJ, Mosdol A, Witte DR, Martikainen P, Stafford M, Shipley MJ, Marmot MG. Dietary patterns and 15-y risks of major coronary events, diabetes, and mortality. *Am J Clin Nutr* 2008 May;87(5):1414-21.
- (240) Martinez-Gonzalez MA, de IFA, Nunez-Cordoba JM, Basterra-Gortari FJ, Beunza JJ, Vazquez Z, Benito S, Tortosa A, Bes-Rastrollo M. Adherence to Mediterranean diet and risk of developing diabetes: prospective cohort study. *BMJ* 2008 Jun 14;336(7657):1348-51.
- (241) Nettleton JA, Steffen LM, Ni H, Liu K, Jacobs DR, Jr. Dietary patterns and risk of incident type 2 diabetes in the Multi-Ethnic Study of Atherosclerosis (MESA). *Diabetes Care* 2008 Sep;31(9):1777-82.
- (242) Kim HS, Park SY, Grandinetti A, Holck PS, Waslien C. Major dietary patterns, ethnicity, and prevalence of type 2 diabetes in rural Hawaii. *Nutrition* 2008 Nov;24(11-12):1065-72.
- (243) Esmailzadeh A, Azadbakht L. Food intake patterns may explain the high prevalence of cardiovascular risk factors among Iranian women. *J Nutr* 2008 Aug;138(8):1469-75.



- (244) Sanchez-Tainta A, Estruch R, Bullo M, Corella D, Gomez-Gracia E, Fiol M, Algorta J, Covas MI, Lapetra J, Zazpe I, Ruiz-Gutierrez V, Ros E, et al. Adherence to a Mediterranean-type diet and reduced prevalence of clustered cardiovascular risk factors in a cohort of 3,204 high-risk patients. *Eur J Cardiovasc Prev Rehabil* 2008 Oct;15(5):589-93.
- (245) He FJ, MacGregor GA. Beneficial effects of potassium on human health. *Physiologia Plantarum* 2008;133(4):725-35.
- (246) Shi Z-M, Hu X-S, Yuan B-J, Gibson R, Dai Y, Garg M. Association between magnesium: Iron intake ratio and diabetes in Chinese adults in Jiangsu Province. *Diabetic Medicine* 2008;25(10):1164-70.
- (247) Liese AD, Weis KE, Schulz M, Toozee JA. Food intake patterns associated with incident type 2 diabetes: the Insulin Resistance Atherosclerosis Study. *Diabetes Care* 2009 Feb;32(2):263-8.
- (248) Liese AD, Nichols M, Sun X, D'Agostino RB, Jr., Haffner SM. Adherence to the DASH Diet is inversely associated with incidence of type 2 diabetes: the insulin resistance atherosclerosis study. *Diabetes Care* 2009 Aug;32(8):1434-6.
- (249) Wannamethee SG, Whincup PH, Thomas MC, Sattar N. Associations between dietary fiber and inflammation, hepatic function, and risk of type 2 diabetes in older men: potential mechanisms for the benefits of fiber on diabetes risk. *Diabetes Care* 2009 Oct;32(10):1823-5.
- (250) Ford ES, Bergmann MM, Kroger J, Schienkiewitz A, Weikert C, Boeing H. Healthy living is the best revenge: findings from the European Prospective Investigation Into Cancer and Nutrition-Potsdam study. *Arch Intern Med* 2009 Aug 10;169(15):1355-62.
- (251) De M, V, Laaksonen DE. Dietary fibers: Current trends and health benefits in the metabolic syndrome and type 2 diabetes. [Portuguese]. *Arquivos Brasileiros de Endocrinologia e Metabologia* 53 (5) (pp 509-518), 2009;July.
- (252) Noel SE, Newby PK, Ordovas JM, Tucker KL. A traditional rice and beans pattern is associated with metabolic syndrome in Puerto Rican older adults. *Journal of Nutrition* 2009;139(7):1360-7.
- (253) Villegas R, Shu XO, Li H, Cai H, Gong Y, Gao Y-T, Wei Z. Dietary patterns and the incidence of type 2 diabetes: The shanghai women health study. *Diabetes Conference: 69th Annual Meeting of the American Diabetes Association New Orleans, LA United States Conference Publication* 2009;58 (SUPPL.1A):960-P.
- (254) Maskarinec G, Erber E, Grandinetti A, Park SY, Hopping BN, Kolonel LN. Dietary patterns and risk of type 2 diabetes: The multi-ethnic cohort. *Canadian Journal of Diabetes Conference: IDF 2009*;33(3):P303, DOI: 10.1016/S1499-2671(09)33298-0.
- (255) Simila M, Valsta L, Kontto J, Virtamo J. Dietary glycemic index and risk of type 2 diabetes: Foods with other effects opposite to their glycemic risks complicate the results. *Journal of Diabetes Conference: 3rd International Congress on Prediabetes and the Metabolic Syndrome Nice France Conference Publication* 2009;1 (SUPPL.1):A73.
- (256) Hopping BN, Erber E, Grandinetti A, Verheus M, Kolonel LN, Maskarinec G. Dietary fiber, magnesium, and glycemic load alter risk of type 2 diabetes in a multiethnic cohort in Hawaii. *J Nutr* 2010 Jan;140(1):68-74.
- (257) Erber E, Hopping BN, Grandinetti A, Park SY, Kolonel LN, Maskarinec G. Dietary patterns and risk for diabetes: the multiethnic cohort. *Diabetes Care* 2010 Mar;33(3):532-8.
- (258) Walker KZ, O'Dea K, Gomez M, Girgis S, Colagiuri R. Diet and exercise in the prevention of diabetes. *J Hum Nutr Diet* 2010 Aug;23(4):344-52.
- (259) Beulens JW, van der AD, Grobbee DE, Sluijs I, Spijkerman AM, van der Schouw YT. Dietary phylloquinone and menaquinones intakes and risk of type 2 diabetes. *Diabetes Care* 2010 Aug;33(8):1699-705.
- (260) Nanri A, Mizoue T, Noda M, Takahashi Y, Kirii K, Inoue M, Tsugane S. Magnesium intake and type II diabetes in Japanese men and women: the Japan Public Health Center-based Prospective Study. *Eur J Clin Nutr* 2010 Oct;64(10):1244-7.

- (261) Kirii K, Iso H, Date C, Fukui M, Tamakoshi A. Magnesium intake and risk of self-reported type 2 diabetes among Japanese. *J Am Coll Nutr* 2010 Apr;29(2):99-106.
- (262) Sluijs I, van der Schouw YT, van der AD, Spijkerman AM, Hu FB, Grobbee DE, Beulens JW. Carbohydrate quantity and quality and risk of type 2 diabetes in the European Prospective Investigation into Cancer and Nutrition-Netherlands (EPIC-NL) study. *Am J Clin Nutr* 2010 Oct;92(4):905-11.
- (263) Esposito K, Kastorini CM, Panagiotakos DB, Giugliano D. Prevention of type 2 diabetes by dietary patterns: a systematic review of prospective studies and meta-analysis. *Metab Syndr Relat Disord* 2010 Dec;8(6):471-6.
- (264) Pronk NP, Lowry M, Kottke TE, Austin E, Gallagher J, Katz A. The association between optimal lifestyle adherence and short-term incidence of chronic conditions among employees. *Popul Health Manag* 2010 Dec;13(6):289-95.
- (265) Rojas-Marcos PM, Del VL, Ferrer MF, Runkle I, Duran A, Perez-Ferre N, Bordiu E, Cabrero L, Calle-Pascual AL. The lifestyle patterns in a Mediterranean population and its association with diabetes mellitus. MOPOR case control study. *Obesity and Metabolism* 2010;6(2-3):69-75.
- (266) Pereira MA, Odegaard AO, Koh W-P, Gross MD, Yuan J-M. Risk of type 2 diabetes according to behavioral risk factors in the Singapore Chinese health study. *Diabetes Conference: 70th Scientific Sessions of the American Diabetes Association Orlando, FL United States Conference Publication* 2010;1159-P.
- (267) Chiuve S, Sampson L, Willett W. Do nutrition rating systems promote a healthy diet? An evaluation of the Overall Nutritional Quality Index (ONQI) and risk of chronic disease. *FASEB Journal Conference: Experimental Biology* 2010;April.
- (268) Hruby A, Jacques PF, Rumawas ME, Fox CS, Meigs JB, Troy LM. Mediterranean-style dietary pattern and incident diabetes in the framingham heart study offspring. *FASEB Journal Conference: Experimental Biology* 2010;April.
- (269) Dong JY, Zhang L, Zhang YH, Qin LQ. Dietary glycaemic index and glycaemic load in relation to the risk of type 2 diabetes: a meta-analysis of prospective cohort studies. *Br J Nutr* 2011 Dec;106(11):1649-54.
- (270) Salas-Salvado J, Bullo M, Babio N, Martinez-Gonzalez MA, Ibarrola-Jurado N, Basora J, Estruch R, Covas MI, Corella D, Aros F, Ruiz-Gutierrez V, Ros E. Reduction in the incidence of type 2 diabetes with the Mediterranean diet: results of the PREDIMED-Reus nutrition intervention randomized trial. *Diabetes Care* 2011 Jan;34(1):14-9.
- (271) Simila ME, Valsta LM, Kontto JP, Albanes D, Virtamo J. Low-, medium- and high-glycaemic index carbohydrates and risk of type 2 diabetes in men. *Br J Nutr* 2011 Apr;105(8):1258-64.
- (272) Kataja-Tuomola MK, Kontto JP, Mannisto S, Albanes D, Virtamo J. Intake of antioxidants and risk of type 2 diabetes in a cohort of male smokers. *Eur J Clin Nutr* 2011 May;65(5):590-7.
- (273) Daniel CR, Prabhakaran D, Kapur K, Graubard BI, Devasenapathy N, Ramakrishnan L, George PS, Shetty H, Ferrucci LM, Yurgalevitch S, Chatterjee N, Reddy KS, et al. A cross-sectional investigation of regional patterns of diet and cardio-metabolic risk in India. *Nutr J* 2011 Jan 28;10:12.
- (274) de KL, Chiuve SE, Fung TT, Willett WC, Rimm EB, Hu FB. Diet-quality scores and the risk of type 2 diabetes in men. *Diabetes Care* 2011 May;34(5):1150-6.
- (275) Yu R, Woo J, Chan R, Sham A, Ho S, Tso A, Cheung B, Lam TH, Lam K. Relationship between dietary intake and the development of type 2 diabetes in a Chinese population: the Hong Kong Dietary Survey. *Public Health Nutr* 2011 Jul;14(7):1133-41.
- (276) Lopes AC, Santos LC, Lima-Costa MF, Caiaffa WT. Nutritional factors associated with chronic non-communicable diseases - the Bambui Project: a population-based study. *Cad Saude Publica* 2011 Jun;27(6):1185-91.



- (277) van Woudenberg GJ, Kuijsten A, Sijbrands EJ, Hofman A, Witteman JC, Feskens EJ. Glycemic index and glycemic load and their association with C-reactive protein and incident type 2 diabetes. *J Nutr Metab* 2011;2011:623076.
- (278) Dong JY, Xun P, He K, Qin LQ. Magnesium intake and risk of type 2 diabetes: meta-analysis of prospective cohort studies. *Diabetes Care* 2011 Sep;34(9):2116-22.
- (279) Chiuve SE, Sampson L, Willett WC. The association between a nutritional quality index and risk of chronic disease. *American Journal of Preventive Medicine* 2011;40(5):505-13.
- (280) Odegaard AO, Koh W-P, Butler LM, Duval S, Gross MD, Yu MC, Yuan J-M, Pereira MA. Dietary patterns and incident type 2 diabetes in Chinese men and women the Singapore Chinese Health Study. *Diabetes Care* 2011;34(4):880-5.
- (281) Alhazmi A, Stojanovski E, McEvoy M, Garg ML. Association between dietary pattern and type 2 diabetes: A systematic literature review and meta-analysis. *Australasian Medical Journal Conference: 35th Annual Scientific Meeting Joint Annual Scientific Meeting of the Nutrition Society of New Zealand and the Nutrition Society of Australia Queenstown New Zealand Conference Publication* 2011.
- (282) Valdes S, Soriquer FC, Goday A, Bosch A, Bordiu E, Calle A, Carmena R, Casamitjana R, Castano L, Castell C, Catala M, Delgado E, et al. Prevalence of diabetes and impaired glucose regulation in Spain: Di@bet.es study. *Diabetologia Conference: 47th Annual Meeting of the European Association for the Study of Diabetes, EASD* 2011;54 (Suppl 1):S140 (Abstract 325).
- (283) Ericson UC, Sonestedt E, Gullberg B, Hellstrand S, Hindy G, Wirfalt E, Orholm-Melander M. High intake of protein and processed meat is associated with increased incidence of type 2 diabetes. *Diabetologia Conference: 47th Annual Meeting of the European Association for the Study of Diabetes, EASD* 2011;54 (Suppl 1):S12 (Abstract 13).
- (284) Naja F, Hwalla N, Itani L, Salem M, Azar ST, Zeidan MN, Nasreddine L. Dietary patterns and odds of Type 2 diabetes in Beirut, Lebanon: a case-control study. *Nutr Metab (Lond)* 2012 Dec 27;9(1):111.
- (285) Weng LC, Lee NJ, Yeh WT, Ho LT, Pan WH. Lower intake of magnesium and dietary fiber increases the incidence of type 2 diabetes in Taiwanese. *J Formos Med Assoc* 2012 Nov;111(11):651-9.
- (286) Morimoto A, Ohno Y, Tatsumi Y, Mizuno S, Watanabe S. Effects of healthy dietary pattern and other lifestyle factors on incidence of diabetes in a rural Japanese population. *Asia Pac J Clin Nutr* 2012;21(4):601-8.
- (287) Tobias DK, Hu FB, Chavarro J, Rosner B, Mozaffarian D, Zhang C. Healthful dietary patterns and type 2 diabetes mellitus risk among women with a history of gestational diabetes mellitus. *Arch Intern Med* 2012 Nov 12;172(20):1566-72.
- (288) Song SJ, Lee JE, Paik HY, Park MS, Song YJ. Dietary patterns based on carbohydrate nutrition are associated with the risk for diabetes and dyslipidemia. *Nutr Res Pract* 2012 Aug;6(4):349-56.
- (289) Sonestedt E, Overby NC, Laaksonen DE, Birgisdottir BE. Does high sugar consumption exacerbate cardiometabolic risk factors and increase the risk of type 2 diabetes and cardiovascular disease? *Food Nutr Res* 2012;56.
- (290) van Aerde MA, Witte DR, Jeppesen C, Soedamah-Muthu SS, Bjerregaard P, Jorgensen ME. Glycemic index and glycemic load in relation to glucose intolerance among Greenland's Inuit population. *Diabetes Res Clin Pract* 2012 Aug;97(2):298-305.
- (291) Munch-Andersen T, Olsen DB, Sondergaard H, Daugaard JR, Bysted A, Christensen DL, Saltin B, Helge JW. Metabolic profile in two physically active Inuit groups consuming either a western or a traditional Inuit diet. *Int J Circumpolar Health* 2012 Mar 19;71:17342.
- (292) Malik VS, Fung TT, van Dam RM, Rimm EB, Rosner B, Hu FB. Dietary patterns during adolescence and risk of type 2 diabetes in middle-aged women. *Diabetes Care* 2012 Jan;35(1):12-8.

- (293) Ibarrola-Jurado N, Salas-Salvado J, Martinez-Gonzalez MA, Bullo M. Dietary phylloquinone intake and risk of type 2 diabetes in elderly subjects at high risk of cardiovascular disease. *American Journal of Clinical Nutrition* 96 (5) (pp 1113-1118), 2012;November.
- (294) Chatterjee R, Colangelo LA, Yeh HC, Anderson CA, Daviglius ML, Liu K, Brancati FL. Potassium intake and risk of incident type 2 diabetes mellitus: The Coronary Artery Risk Development in Young Adults (CARDIA) Study. *Diabetologia* 2012;55(5):1295-303.
- (295) McEvoy CT, Temple N, Woodside JV. Vegetarian diets, low-meat diets and health: a review. *Public health nutrition* 2012;15(12):2287-94.
- (296) Henderson M, Benedetti A, Gray-Donald K. Dietary habits and their associations with insulin sensitivity and insulin secretion in youth. *Pediatric Diabetes Conference: 38th Annual Meeting of the International Society for Pediatric and Adolescent Diabetes, ISPAD 2012;October.*
- (297) Nothlings U. Combined lifestyle factors and chronic disease risk. *American Journal of Epidemiology Conference: 45th Annual Meeting of the Society for Epidemiologic Research, SER 2012;15.*
- (298) Sakurai M, Nakamura K, Miura K, Takamura T, Yoshita K, Sasaki S, Nagasawa SY, Morikawa Y, Ishizaki M, Kido T, Naruse Y, Suwazono Y, et al. Family history of diabetes, lifestyle factors, and the 7-year incident risk of type 2 diabetes mellitus in middle-aged Japanese men and women. *J Diabetes Investig* 2013 May 6;4(3):261-8.
- (299) Oba S, Nanri A, Kurotani K, Goto A, Kato M, Mizoue T, Noda M, Inoue M, Tsugane S. Dietary glycemic index, glycemic load and incidence of type 2 diabetes in Japanese men and women: the Japan Public Health Center-based Prospective Study. *Nutr J* 2013 Dec 27;12(1):165.
- (300) Greenwood DC, Threapleton DE, Evans CE, Cleghorn CL, Nykjaer C, Woodhead C, Burley VJ. Glycemic index, glycemic load, carbohydrates, and type 2 diabetes: systematic review and dose-response meta-analysis of prospective studies. *Diabetes Care* 2013 Dec;36(12):4166-71.
- (301) Zamora-Ros R, Forouhi NG, Sharp SJ, Gonzalez CA, Buijsse B, Guevara M, van der Schouw YT, Amiano P, Boeing H, Bredsdorff L, Clavel-Chapelon F, Fagherazzi G, et al. The association between dietary flavonoid and lignan intakes and incident type 2 diabetes in European populations: the EPIC-InterAct study. *Diabetes Care* 2013 Dec;36(12):3961-70.
- (302) Rossi M, Turati F, Lagiou P, Trichopoulos D, Augustin LS, La VC, Trichopoulou A. Mediterranean diet and glycaemic load in relation to incidence of type 2 diabetes: results from the Greek cohort of the population-based European Prospective Investigation into Cancer and Nutrition (EPIC). *Diabetologia* 2013 Nov;56(11):2405-13.
- (303) Hsiao PY, Mitchell DC, Coffman DL, Craig WG, Hartman TJ, Still C, Jensen GL. Dietary patterns and relationship to obesity-related health outcomes and mortality in adults 75 years of age or greater. *J Nutr Health Aging* 2013;17(6):566-72.
- (304) Slyper AH. The influence of carbohydrate quality on cardiovascular disease, the metabolic syndrome, type 2 diabetes, and obesity - an overview. *J Pediatr Endocrinol Metab* 2013;26(7-8):617-29.
- (305) Shirani F, Salehi-Abargouei A, Azadbakht L. Effects of Dietary Approaches to Stop Hypertension (DASH) diet on some risk for developing type 2 diabetes: a systematic review and meta-analysis on controlled clinical trials. *Nutrition* 2013 Jul;29(7-8):939-47.
- (306) Livesey G, Taylor R, Livesey H, Liu S. Is there a dose-response relation of dietary glycemic load to risk of type 2 diabetes? Meta-analysis of prospective cohort studies. *Am J Clin Nutr* 2013 Mar;97(3):584-96.

- (307) Gopinath B, Rohtchina E, Flood VM, Mitchell P. Diet quality is prospectively associated with incident impaired fasting glucose in older adults. *Diabet Med* 2013 May;30(5):557-62.
- (308) Sluijs I, Beulens JW, van der Schouw YT, van der AD, Buckland G, Kuijsten A, Schulze MB, Amiano P, Ardanaz E, Balkau B, Boeing H, Gavrila D, et al. Dietary glycemic index, glycemic load, and digestible carbohydrate intake are not associated with risk of type 2 diabetes in eight European countries. *J Nutr* 2013 Jan;143(1):93-9.
- (309) Bhupathiraju SN, Pan A, Malik VS, Manson JE, Willett WC, van Dam RM, Hu FB. Caffeinated and caffeine-free beverages and risk of type 2 diabetes. *Am J Clin Nutr* 2013 Jan;97(1):155-66.
- (310) Nanri A, Shimazu T, Takachi R, Ishihara J, Mizoue T, Noda M, Inoue M, Tsugane S. Dietary patterns and type 2 diabetes in Japanese men and women: the Japan Public Health Center-based Prospective Study. *Eur J Clin Nutr* 2013 Jan;67(1):18-24.
- (311) Bauer F, Beulens JW, van der AD, Wijmenga C, Grobbee DE, Spijkerman AM, van der Schouw YT, Onland-Moret NC. Dietary patterns and the risk of type 2 diabetes in overweight and obese individuals. *Eur J Nutr* 2013 Apr;52(3):1127-34.
- (312) Abiemo EE, Alonso A, Nettleton JA, Steffen LM, Bertoni AG, Jain A, Lutsey PL. Relationships of the Mediterranean dietary pattern with insulin resistance and diabetes incidence in the Multi-Ethnic Study of Atherosclerosis (MESA). *Br J Nutr* 2013 Apr 28;109(8):1490-7.
- (313) Dominguez LJ, Bes-Rastrollo M, de IF-A, Toledo E, Beunza JJ, Barbagallo M, Martinez-Gonzalez MA. Similar prediction of total mortality, diabetes incidence and cardiovascular events using relative- and absolute-component Mediterranean diet score: the SUN cohort. *Nutr Metab Cardiovasc Dis* 2013 May;23(5):451-8.
- (314) Ortega E, Franch J, Castell C, Goday A, Ribas-Barba L, Soriguer F, Vendrell J, Casamitjana R, Bosch-Comas A, Bordiu E, Calle-Pascual A, Carmena R, et al. Mediterranean diet adherence in individuals with prediabetes and unknown diabetes: The Di@bet.es study. *Annals of Nutrition and Metabolism* 2013;62(4):339-46.
- (315) Reeves MM, Healy GN, Owen N, Shaw JE, Zimmet PZ, Dunstan DW. Joint associations of poor diet quality and prolonged television viewing time with abnormal glucose metabolism in Australian men and women. *Preventive Medicine* 2013;57(5):471-6.
- (316) Kroger J. Adherence to predefined dietary patterns and incident type 2 diabetes in European populations: EPIC-InterAct study. *Diabetologia Conference: 49th Annual Meeting of the European Association for the Study of Diabetes, EASD 2013*;56 (Suppl 1):S162 (Abstract 384).
- (317) Ahmadi AS, Luben RN, Powell N, Bhaniani A, Wareham NJ, Forouhi NG, Khaw K-T. Dietary intake of carbohydrates and risk of type 2 diabetes: European Prospective Investigation into Cancer in Norfolk study. *Diabetologia Conference: 49th Annual Meeting of the European Association for the Study of Diabetes, EASD 2013*;56 (Suppl 1):S159 (Abstract 376).
- (318) Ashton L, Cade JE, Burley VJ. A type 2 diabetes mellitus prevention index predicts incident diabetes in the UK Women's Cohort Study. *Proceedings of the Nutrition Society Conference: Nutrition Society Summer Meeting 2013*;72(OCE4):E257.
- (319) Threapleton DE, Greenwood DC, Evans C, Cleghorn CL, Nykjaer C, Woodhead C, Burley VJ. Dietary fibre intake and diabetes risk: A systematic review and meta-analysis of prospective studies. *Proceedings of the Nutrition Society Conference: Nutrition Society Summer Meeting 2013*;72(OCE4):E253.
- (320) Aldwairji M, Orfila C, Burley VJ. Dietary fibre intake and risk of type 2 diabetes in British women. *Proceedings of the Nutrition Society Conference: Nutrition Society Summer Meeting 2013*;72(OCE4):E204.
- (321) Abhari SA, Luben R, Powell N, Bhaniani A, Wareham N, Forouhi N, Khaw K-T. Dietary intake of carbohydrates and risk of type 2 diabetes: European prospective

- investigation into cancer Norfolk study. *European Journal of Epidemiology Conference: EuroEpi 2013*;August.
- (322) Fraser G, Fan J, Anousheh R, Katuli S, Herring P. Vegetarian dietary patterns and cardiovascular risk factors among black subjects in the AHS-2 cohort. *American Journal of Epidemiology Conference: 46th Annual Society for Epidemiologic Research, SER Meeting Boston, MA United States Conference Publication 2013*;177 (Suppl. 11):S129.
- (323) Ibarrola-Jurado N, Salas-Salvado J, Martinez-Gonzalez MA, Bullo M. Cross-sectional and longitudinal analysis between dietary phyloquinone intake and type 2 diabetes incidence in elderly mediterranean individuals at high cardiovascular risk. *Annals of Nutrition and Metabolism Conference: Mediterranean Foods on Health and Disease - World Forum for Nutrition Research Conference 2013*;May.
- (324) Naja F, Hwalla N, Itani L, Salem M, Azar S, Nabahani-Zeidan M, Nasreddine L. Dietary patterns and risk of type 2 diabetes mellitus in lebanon: A case-control study. *Journal of Diabetes Conference: 5th International Congress on Prediabetes and the Metabolic Syndrome Early Interventions for Diabetes and Dysglycaemia Surgery in the Treatment of Obesity and Diabetes Vienna Austria Conference Publication 2013*;April.
- (325) Pan A, Cahill LE, Chiuve SE, Sun Q, Willett WC, Hu FB, Rimm EB. Fried food consumption and risk of type 2 diabetes and coronary heart disease: Two prospective studies in us men and women. *Circulation Conference: American Heart Association's Epidemiology and Prevention/Physical Activity, Nutrition and Metabolism 2013*;26.
- (326) Ginter E, Simko V, Panakova V. Antioxidants in health and disease. *Bratisl Lek Listy 2014*;115(10):603-6.
- (327) Alhazmi A, Stojanovski E, McEvoy M, Brown W, Garg ML. Diet quality score is a predictor of type 2 diabetes risk in women: the Australian Longitudinal Study on Women's Health. *Br J Nutr 2014 Sep 28*;112(6):945-51.
- (328) Tsugane S, Sawada N. The JPHC study: design and some findings on the typical Japanese diet. *Jpn J Clin Oncol 2014 Sep*;44(9):777-82.
- (329) Costanian C, Bennett K, Hwalla N, Assaad S, Sibai AM. Prevalence, correlates and management of type 2 diabetes mellitus in Lebanon: findings from a national population-based study. *Diabetes Res Clin Pract 2014 Sep*;105(3):408-15.
- (330) McEvoy CT, Cardwell CR, Woodside JV, Young IS, Hunter SJ, McKinley MC. A posteriori dietary patterns are related to risk of type 2 diabetes: findings from a systematic review and meta-analysis. *J Acad Nutr Diet 2014 Nov*;114(11):1759-75.
- (331) Cahill LE, Pan A, Chiuve SE, Sun Q, Willett WC, Hu FB, Rimm EB. Fried-food consumption and risk of type 2 diabetes and coronary artery disease: a prospective study in 2 cohorts of US women and men. *Am J Clin Nutr 2014 Aug*;100(2):667-75.
- (332) Koloverou E, Esposito K, Giugliano D, Panagiotakos D. The effect of Mediterranean diet on the development of type 2 diabetes mellitus: a meta-analysis of 10 prospective studies and 136,846 participants. *Metabolism 2014 Jul*;63(7):903-11.
- (333) Mai K. [Mediterranean diet lowers diabetes risk]. *MMW Fortschr Med 2014 May 28*;156(10):35.
- (334) Batis C, Mendez MA, Sotres-Alvarez D, Gordon-Larsen P, Popkin B. Dietary pattern trajectories during 15 years of follow-up and HbA1c, insulin resistance and diabetes prevalence among Chinese adults. *J Epidemiol Community Health 2014 Aug*;68(8):773-9.
- (335) Frank LK, Kroger J, Schulze MB, Bedu-Addo G, Mockenhaupt FP, Danquah I. Dietary patterns in urban Ghana and risk of type 2 diabetes. *Br J Nutr 2014 Jul 14*;112(1):89-98.
- (336) Salas-Salvado J, Bullo M, Estruch R, Ros E, Covas MI, Ibarrola-Jurado N, Corella D, Aros F, Gomez-Gracia E, Ruiz-Gutierrez V, Romaguera D, Lapetra J, et al. Prevention of diabetes with Mediterranean diets: a subgroup analysis of a randomized trial. *Ann Intern Med 2014 Jan 7*;160(1):1-10.



- (337) Chiu TH, Huang HY, Chiu YF, Pan WH, Kao HY, Chiu JP, Lin MN, Lin CL. Taiwanese vegetarians and omnivores: dietary composition, prevalence of diabetes and IFG. *PLoS One* 2014;9(2):e88547.
- (338) Rosa ML, Falcao PM, Yokoo EM, da Cruz Filho RA, Alcoforado VM, de Souza BS, Pinto FN, Nery AB. Brazil's staple food and incident diabetes. *Nutrition* 2014 Mar;30(3):365-8.
- (339) Yao B, Fang H, Xu W, Yan Y, Xu H, Liu Y, Mo M, Zhang H, Zhao Y. Dietary fiber intake and risk of type 2 diabetes: a dose-response analysis of prospective studies. *Eur J Epidemiol* 2014 Feb;29(2):79-88.
- (340) Grosso G, Pajak A, Mistretta A, Marventano S, Raciti T, Buscemi S, Drago F, Scalfi L, Galvano F. Protective role of the Mediterranean diet on several cardiovascular risk factors: evidence from Sicily, southern Italy. *Nutr Metab Cardiovasc Dis* 2014 Apr;24(4):370-7.
- (341) Grosso G, Mistretta A, Frigiola A, Gruttadauria S, Biondi A, Basile F, Vitaglione P, D'Orazio N, Galvano F. Mediterranean diet and cardiovascular risk factors: a systematic review. *Crit Rev Food Sci Nutr* 2014;54(5):593-610.
- (342) InterAct Consortium. Adherence to predefined dietary patterns and incident type 2 diabetes in European populations: EPIC-InterAct Study. *Diabetologia* 2014 Feb;57(2):321-33.
- (343) Alhazmi A, Stojanovski E, McEvoy M, Garg ML. The association between dietary patterns and type 2 diabetes: a systematic review and meta-analysis of cohort studies. *J Hum Nutr Diet* 2014 Jun;27(3):251-60.
- (344) hmadi-Abhari S, Luben RN, Powell N, Bhaniani A, Chowdhury R, Wareham NJ, Forouhi NG, Khaw KT. Dietary intake of carbohydrates and risk of type 2 diabetes: the European Prospective Investigation into Cancer-Norfolk study. *Br J Nutr* 2014 Jan 28;111(2):342-52.
- (345) Liu YJ, Zhan J, Liu XL, Wang Y, Ji J, He QQ. Dietary flavonoids intake and risk of type 2 diabetes: a meta-analysis of prospective cohort studies. *Clin Nutr* 2014 Feb;33(1):59-63.
- (346) Sakurai M, Nakamura K, Miura K, Takamura T, Yoshita K, Nagasawa SY, Morikawa Y, Ishizaki M, Kido T, Naruse Y, Suwazono Y, Sasaki S, et al. Sugar-sweetened beverage and diet soda consumption and the 7-year risk for type 2 diabetes mellitus in middle-aged Japanese men. *Eur J Nutr* 2014 Feb;53(1):251-8.
- (347) Jeppesen C, Bjerregaard P, Jorgensen ME. Dietary patterns in Greenland and their relationship with type 2 diabetes mellitus and glucose intolerance. *Public Health Nutr* 2014 Feb;17(2):462-70.
- (348) Kahn R, Sievenpiper JL. Dietary sugar and body weight: Have we reached a crisis in the epidemic of obesity and diabetes? - We have but the pox on sugar is overwrought and overworked. *Diabetes Care* 37 (4) (pp 957-962), 2014;April.
- (349) Bhupathiraju SN, Tobias DK, Malik VS, Pan A, Hruby A, Manson JAE, Willett WC, Hu FB. Glycemic index, glycemic load, and risk of type 2 diabetes: Results from 3 large us cohorts and an updated meta-analysis. *Circulation Conference: American Heart Association's Epidemiology and Prevention/Nutrition, Physical Activity, and Metabolism* 2014;(var.pagings):25.
- (350) Vadiveloo M, Parekh N, Mattei J. Consumption of a greater variety of healthful foods is associated with metabolic syndrome and its components in U.S. Adults. *Circulation Conference: American Heart Association's Epidemiology and Prevention/Nutrition, Physical Activity, and Metabolism* 2014;129 (Suppl 1):P066.
- (351) McGeoghegan L, Muirhead CR, Almoosawi S. Association between an anti-inflammatory and anti-oxidant dietary pattern and diabetes in British adults: results from the national diet and nutrition survey rolling programme years 1-4. *Int J Food Sci Nutr* 2015 Aug;67(5):553-61.

- (352) Dominguez LJ, Bes-Rastrollo M, Basterra-Gortari FJ, Gea A, Barbagallo M, Martinez-Gonzalez MA. Association of a Dietary Score with Incident Type 2 Diabetes: The Dietary-Based Diabetes-Risk Score (DDS). *PLoS One* 2015;10(11):e0141760.
- (353) Li X, Wang X, Wei J, Yang T. [Relationship between dietary vitamin C and Type 2 diabetes]. *Zhong Nan Da Xue Xue Bao Yi Xue Ban* 2015 Oct;40(10):1109-14.
- (354) AlEsa HB, Bhupathiraju SN, Malik VS, Wedick NM, Campos H, Rosner B, Willett WC, Hu FB. Carbohydrate quality and quantity and risk of type 2 diabetes in US women. *Am J Clin Nutr* 2015 Dec;102(6):1543-53.
- (355) Otto MC, Padhye NS, Bertoni AG, Jacobs DR, Jr., Mozaffarian D. Everything in Moderation--Dietary Diversity and Quality, Central Obesity and Risk of Diabetes. *PLoS One* 2015;10(10):e0141341.
- (356) Frank LK, Jannasch F, Kroger J, Bedu-Addo G, Mockenhaupt FP, Schulze MB, Danquah I. A Dietary Pattern Derived by Reduced Rank Regression is Associated with Type 2 Diabetes in An Urban Ghanaian Population. *Nutrients* 2015 Jul 7;7(7):5497-514.
- (357) Anjana RM, Sudha V, Nair DH, Lakshmipriya N, Deepa M, Pradeepa R, Shanthirani CS, Subhashini S, Malik V, Unnikrishnan R, Binu VS, Patel SA, et al. Diabetes in Asian Indians-How much is preventable? Ten-year follow-up of the Chennai Urban Rural Epidemiology Study (CURES-142). *Diabetes Res Clin Pract* 2015 Aug;109(2):253-61.
- (358) Trude AC, Kharmats A, Jock B, Liu D, Lee K, Martins PA, Pardia M, Swartz J, Gittelsohn J. Patterns of Food Consumption are Associated with Obesity, Self-Reported Diabetes and Cardiovascular Disease in Five American Indian Communities. *Ecol Food Nutr* 2015;54(5):437-54.
- (359) InterAct Consortium. Dietary fibre and incidence of type 2 diabetes in eight European countries: the EPIC-InterAct Study and a meta-analysis of prospective studies. *Diabetologia* 2015 Jul;58(7):1394-408.
- (360) Guo H, Ling W. The update of anthocyanins on obesity and type 2 diabetes: experimental evidence and clinical perspectives. *Rev Endocr Metab Disord* 2015 Mar;16(1):1-13.
- (361) Jacobs S, Harmon BE, Boushey CJ, Morimoto Y, Wilkens LR, Le ML, Kroger J, Schulze MB, Kolonel LN, Maskarinec G. A priori-defined diet quality indexes and risk of type 2 diabetes: the Multiethnic Cohort. *Diabetologia* 2015 Jan;58(1):98-112.
- (362) Perez-Ferre N, Del VL, Torrejon MJ, Barca I, Calvo MI, Matia P, Rubio MA, Calle-Pascual AL. Diabetes mellitus and abnormal glucose tolerance development after gestational diabetes: A three-year, prospective, randomized, clinical-based, Mediterranean lifestyle interventional study with parallel groups. *Clin Nutr* 2015 Aug;34(4):579-85.
- (363) De Oliveira Otto MC, Padhye NS, Bertoni AG, Jacobs DR, Mozaffarian D. Everything in moderation - Dietary diversity and quality, central obesity and risk of diabetes. *PLoS ONE* 2015;10(10):e0141341.
- (364) Kuijsten A, Aune D, Schulze MB, Norat T, van Woudenberg GJ, Beulens JWJ, Sluijs I, Spijkerman AMW, van der ADL, Palli D, Kuhn T, Wendt A, et al. Dietary fibre and incidence of type 2 diabetes in eight European countries: the EPIC-InterAct Study and a meta-analysis of prospective studies. *Diabetologia* 2015;58(7):1394-408.
- (365) Sluijs I, Cadier E, Beulens JWJ, van der ADL, Spijkerman AMW, van der Schouw YT. Dietary intake of carotenoids and risk of type 2 diabetes. *Nutrition, Metabolism and Cardiovascular Diseases* 2015;25(4):376-81.
- (366) Bes-Rastrollo M, Dominguez LJ, Basterra-Gortari FJ, Gea A, Barbagallo M, Perez-Cornago A, Martinez-Gonzalez MA. A dietary pattern score and risk of developing type 2 diabetes in the sun project. *Annals of Nutrition and Metabolism Conference: 12th European Nutrition Conference, FENS* 2015;67:187.
- (367) Barouti AA, Hilding A, Ostenson C-G, Bjorklund A. Fruit and vegetable consumption and risk of prediabetes and type 2 diabetes in a Swedish prospective study.



- Diabetologia Conference: 51st Annual Meeting of the European Association for the Study of Diabetes, EASD 2015;ePoster 317.
- (368) Satija A, Bhupathiraju SN, Willett WC, Manson JE, Sun Q, Hu FB. A prospective study of the association between plant-based dietary patterns and incident type 2 diabetes in women. *Circulation Conference: American Heart Association's Epidemiology and Prevention/Lifestyle and Cardiometabolic Health 2015*;131 (Suppl 1):MP14.
- (369) AlEsa H, Bhupathiraju S, Malik V, Wedick N, Campos H, Rosner B, Willett W, Hu FB. Carbohydrate quality, measured using multiple carbohydrate quality metrics, is negatively associated with risk of type 2 diabetes in us women. *Circulation Conference: American Heart Association's Epidemiology and Prevention/Lifestyle and Cardiometabolic Health 2015*;131 (Suppl 1):Abstract 20.
- (370) Zhou C, Na L, Shan R, Cheng Y, Li Y, Wu X, Sun C. Dietary Vitamin C Intake Reduces the Risk of Type 2 Diabetes in Chinese Adults: HOMA-IR and T-AOC as Potential Mediators. *PLoS One* 2016;11(9):e0163571.
- (371) Reeds J, Mansuri S, Mamakeesick M, Harris SB, Zinman B, Gittelsohn J, Wolever TM, Connelly PW, Hanley A. Dietary Patterns and Type 2 Diabetes Mellitus in a First Nations Community. *Can J Diabetes* 2016 Aug;40(4):304-10.
- (372) Satija A, Bhupathiraju SN, Rimm EB, Spiegelman D, Chiuve SE, Borgi L, Willett WC, Manson JE, Sun Q, Hu FB. Plant-Based Dietary Patterns and Incidence of Type 2 Diabetes in US Men and Women: Results from Three Prospective Cohort Studies. *PLoS Med* 2016 Jun;13(6):e1002039.
- (373) Pastorino S, Richards M, Pierce M, Ambrosini GL. A high-fat, high-glycaemic index, low-fibre dietary pattern is prospectively associated with type 2 diabetes in a British birth cohort. *Br J Nutr* 2016 May;115(9):1632-42.
- (374) Blaak EE. Carbohydrate quantity and quality and cardio-metabolic risk. *Curr Opin Clin Nutr Metab Care* 2016 Jul;19(4):289-93.
- (375) Cespedes EM, Hu FB, Tinker L, Rosner B, Redline S, Garcia L, Hingle M, Van HL, Howard BV, Levitan EB, Li W, Manson JE, et al. Multiple Healthful Dietary Patterns and Type 2 Diabetes in the Women's Health Initiative. *Am J Epidemiol* 2016 Apr 1;183(7):622-33.
- (376) Zaroudi M, Yazdani CJ, Mehrabi S, Ghorbani E, Norouzkhani J, Shirashiani H, Nikzad B, Seiedpour M, Izadi M, Mirzaei M, Oveis G, Ahangar N, et al. Dietary Patterns Are Associated with Risk of Diabetes Type 2: A Population-Based Case-Control Study. *Arch Iran Med* 2016 Mar;19(3):166-72.
- (377) Koloverou E, Panagiotakos DB, Georgousopoulou EN, Grekas A, Christou A, Chatzigeorgiou M, Chrysohoou C, Tousoulis D, Stefanadis C, Pitsavos C. Dietary Patterns and 10-year (2002-2012) Incidence of Type 2 Diabetes: Results from the ATTICA Cohort Study. *Rev Diabet Stud* 2016;13(4):246-56.
- (378) Maghsoudi Z, Ghiasvand R, Salehi-Abargouei A. Empirically derived dietary patterns and incident type 2 diabetes mellitus: a systematic review and meta-analysis on prospective observational studies. *Public Health Nutr* 2016 Feb;19(2):230-41.
- (379) Sibomana L, Orchard TJ. Assessment of a long-term outcome of a residential camp on diabetes management in Rwanda. *Diabetes Conference: 76th Scientific Sessions of the American Diabetes Association, ADA 2016*;(Supplement 1).
- (380) Jannasch F, Kroger J, Schulze M. Dietary patterns and Type 2 Diabetes-systematic review and meta-analysis. *European Journal of Epidemiology Conference: Health - Exploring Complexity: An Interdisciplinary Systems Approach, HEC 2016*;(Supplement 1):August.
- (381) Shu L, Shen XM, Li C, Zhang XY, Zheng PF. Dietary patterns are associated with type 2 diabetes mellitus among middle-aged adults in Zhejiang Province, China. *Nutr J* 2017 Dec 13;16(1):81.
- (382) Hong SM, Woo HW, Kim MK, Kim SY, Lee YH, Shin DH, Shin MH, Chun BY, Choi BY. A prospective association between dietary folate intake and type 2 diabetes risk

- among Korean adults aged 40 years or older: the Korean Multi-Rural Communities Cohort (MRCohort) Study. *Br J Nutr* 2017 Dec;118(12):1078-88.
- (383) Li M, Shi Z. Dietary Pattern during 1991-2011 and Its Association with Cardio Metabolic Risks in Chinese Adults: The China Health and Nutrition Survey. *Nutrients* 2017 Nov 6;9(11).
- (384) Syed MA, Mohammed AM. A study on the prevalence of risk factors for diabetes and hypertension among school children in Majmaah, Kingdom of Saudi Arabia. *J Public Health Res* 2017 Sep 21;6(2):829.
- (385) Guasch-Ferre M, Merino J, Sun Q, Fito M, Salas-Salvado J. Dietary Polyphenols, Mediterranean Diet, Prediabetes, and Type 2 Diabetes: A Narrative Review of the Evidence. *Oxid Med Cell Longev* 2017;2017:6723931.
- (386) Tian S, Xu Q, Jiang R, Han T, Sun C, Na L. Dietary Protein Consumption and the Risk of Type 2 Diabetes: A Systematic Review and Meta-Analysis of Cohort Studies. *Nutrients* 2017 Sep 6;9(9):982.
- (387) Voortman T, Kieft-de Jong JC, Ikram MA, Stricker BH, van Rooij FJA, Lahousse L, Tiemeier H, Brusselle GG, Franco OH, Schoufour JD. Adherence to the 2015 Dutch dietary guidelines and risk of non-communicable diseases and mortality in the Rotterdam Study. *Eur J Epidemiol* 2017 Nov;32(11):993-1005.
- (388) Paprott R, Mensink GBM, Schulze MB, Thiele S, Muhlenbruch K, Scheidt-Nave C, Heidemann C. Temporal changes in predicted risk of type 2 diabetes in Germany: findings from the German Health Interview and Examination Surveys 1997-1999 and 2008-2011. *BMJ Open* 2017 Jul 9;7(7):e013058.
- (389) Namazi N, Larijani B, Azadbakht L. Low-Carbohydrate-Diet Score and its Association with the Risk of Diabetes: A Systematic Review and Meta-Analysis of Cohort Studies. *Horm Metab Res* 2017 Aug;49(8):565-71.
- (390) Papier K, D'Este C, Bain C, Banwell C, Seubsman S, Sleigh A, Jordan S. Consumption of sugar-sweetened beverages and type 2 diabetes incidence in Thai adults: results from an 8-year prospective study. *Nutr Diabetes* 2017 Jun 19;7(6):e283.
- (391) Lee Y, Park K. Adherence to a Vegetarian Diet and Diabetes Risk: A Systematic Review and Meta-Analysis of Observational Studies. *Nutrients* 2017 Jun 14;9(6):603.
- (392) Tsilas CS, de Souza RJ, Mejia SB, Mirrahimi A, Cozma AI, Jayalath VH, Ha V, Tawfik R, Di BM, Jenkins AL, Leiter LA, Wolever TMS, et al. Relation of total sugars, fructose and sucrose with incident type 2 diabetes: a systematic review and meta-analysis of prospective cohort studies. *CMAJ* 2017 May 23;189(20):E711-E720.
- (393) Jannasch F, Kroger J, Schulze MB. Dietary Patterns and Type 2 Diabetes: A Systematic Literature Review and Meta-Analysis of Prospective Studies. *J Nutr* 2017 Jun;147(6):1174-82.
- (394) Biggelaar LJ, Eussen SJ, Sep SJ, Mari A, Ferrannini E, Dongen MC, Denissen KF, Wijckmans NE, Schram MT, Kallen CJ, Koster A, Schaper N, et al. Associations of Dietary Glucose, Fructose, and Sucrose with beta-Cell Function, Insulin Sensitivity, and Type 2 Diabetes in the Maastricht Study. *Nutrients* 2017 Apr 13;9(4):380.
- (395) Joy EJ, Green R, Agrawal S, Aleksandrowicz L, Bowen L, Kinra S, Macdiarmid JJ, Haines A, Dangour AD. Dietary patterns and non-communicable disease risk in Indian adults: secondary analysis of Indian Migration Study data. *Public Health Nutr* 2017 Aug;20(11):1963-72.
- (396) Feldman AL, Long GH, Johansson I, Weinehall L, Fharm E, Wennberg P, Norberg M, Griffin SJ, Rolandsson O. Change in lifestyle behaviors and diabetes risk: evidence from a population-based cohort study with 10 year follow-up. *Int J Behav Nutr Phys Act* 2017 Mar 29;14(1):39.
- (397) Drehmer M, Odegaard AO, Schmidt MI, Duncan BB, Cardoso LO, Matos SMA, Molina MDCB, Barreto SM, Pereira MA. Brazilian dietary patterns and the dietary approaches to stop hypertension (DASH) diet-relationship with metabolic syndrome and newly diagnosed diabetes in the ELSA-Brasil study. *Diabetol Metab Syndr* 2017;9:13.

- (398) Andreou E, Papandreou D, Hajigeorgiou P, Kyriakou K, Avraam T, Chappa G, Kallis P, Lazarou C, Philippou C, Christoforou C, Kokkinofa R, Dioghenous C, et al. Type 2 diabetes and its correlates in a first nationwide study among Cypriot adults. *Prim Care Diabetes* 2017 Apr;11(2):112-8.
- (399) den Biggelaar LJCJ, Eussen SJPM, Sep SJS, Mari A, Ferrannini E, van Dongen MCJM, Denissen KFM, Wijckmans NEG, Schram MT, van der Kallen CJ, Koste A, Schaper N, et al. Associations of dietary glucose, fructose, and sucrose with beta-cell function, insulin sensitivity, and type 2 diabetes in the maastricht study. *Nutrients* 2017;9(4):380.
- (400) Galbete CC, Kroger J, Jannasch F, Schwingshackl L, Schwedhelm C, Iqbal K, Weikert C, Boeing H, Schulze M. Nordic diet, mediterranean diet, and the risk of chronic diseases: The epic-potsdam study. *Annals of Nutrition and Metabolism Conference: 21st International Congress of Nutrition, ICN 2017;(Supplement 2):2017.*
- (401) Buyken A, Diederichs T, Rossbach S, Herder C, Roden M, Wudy S, Nothlings U, Alexy U. Carbohydrates from sources with a higher glycaemic index during adolescence: Evening intake is relevant for risk markers of type 2 diabetes in young adulthood. *Annals of Nutrition and Metabolism Conference: 21st International Congress of Nutrition, ICN 2017;(Supplement 2).*
- (402) Ahmed SM, Al MM. A study on the prevalence of risk factors for diabetes and hypertension among school children in Majmaah, Kingdom of Saudi Arabia. *Journal of Public Health Research* 2017;6(2):64-9.
- (403) Oh JS, Kim H, Vijayakumar A, Kwon O, Kim Y, Chang N. Association of dietary flavonoid intake with prevalence of type 2 diabetes mellitus and cardiovascular disease risk factors in korean women aged  $\geq 30$  years. *Journal of Nutritional Science and Vitaminology* 2017;63(1):51-8.
- (404) Konishi K, Wada K, Tamura T, Tsuji M, Kawachi T, Nagata C. Dietary magnesium intake and the risk of diabetes in the Japanese community: results from the Takayama study. *European Journal of Nutrition* 2017;56(2):767-74.
- (405) Koloverou E, Demosthenes DB, Panagiotakos B, Georgousopoulou E, Grekas A, Christou A, Chatzigeorgiou M, Chrysohoou C, Tousoulis D, Stefanadis C, Pitsavos C. The role of dietary patters in 10-year (2002-2012) diabetes incidence. *European Journal of Preventive Cardiology Conference: EuroPREvent 2017;(1 Supplement 1):April.*
- (406) He HZ, Zhang T, Zhou J, Wang DP, Wang HJ, Song Y, Zhu Z, Wang PY, Liu AP. [Relationship between sugary drinks and diabetes of adults in Wuhai city]. *Beijing Da Xue Xue Bao Yi Xue Ban* 2018 Jun 18;50(3):469-73.
- (407) Apidechkul T. Prevalence and factors associated with type 2 diabetes mellitus and hypertension among the hill tribe elderly populations in northern Thailand. *BMC Public Health* 2018 Jun 5;18(1):694.
- (408) Ericson U, Brunkwall L, Alves DJ, Drake I, Hellstrand S, Gullberg B, Sonestedt E, Nilsson PM, Wirfalt E, Orho-Melander M. Food patterns in relation to weight change and incidence of type 2 diabetes, coronary events and stroke in the Malmo Diet and Cancer cohort. *Eur J Nutr* 2018 May 31;58(5):1801-14.
- (409) Yao Z, Gu Y, Zhang Q, Liu L, Meng G, Wu H, Xia Y, Bao X, Shi H, Sun S, Wang X, Zhou M, et al. Estimated daily quercetin intake and association with the prevalence of type 2 diabetes mellitus in Chinese adults. *Eur J Nutr* 2018 May 12;58(2):819-30.
- (410) Galbete C, Nicolaou M, Meeks K, Klipstein-Grobusch K, de-Graft AA, Addo J, Amoah SK, Smeeth L, Owusu-Dabo E, Spranger J, Agyemang C, Mockenhaupt FP, et al. Dietary patterns and type 2 diabetes among Ghanaian migrants in Europe and their compatriots in Ghana: the RODAM study. *Nutr Diabetes* 2018 Apr 25;8(1):25.
- (411) Chiu THT, Pan WH, Lin MN, Lin CL. Vegetarian diet, change in dietary patterns, and diabetes risk: a prospective study. *Nutr Diabetes* 2018 Mar 9;8(1):12.
- (412) Eriksen R, Gibson R, Lamb K, McMeel Y, Vergnaud AC, Spear J, Aresu M, Chan Q, Elliott P, Frost G. Nutrient profiling and adherence to components of the UK national

- dietary guidelines association with metabolic risk factors for CVD and diabetes: Airwave Health Monitoring Study. *Br J Nutr* 2018 Mar;119(6):695-705.
- (413) Weickert MO, Pfeiffer AFH. Impact of Dietary Fiber Consumption on Insulin Resistance and the Prevention of Type 2 Diabetes. *J Nutr* 2018 Jan 1;148(1):7-12.
- (414) He F. Diets with a low glycaemic load have favourable effects on prediabetes progression and regression: a prospective cohort study. *J Hum Nutr Diet* 2018 Jun;31(3):292-300.
- (415) Yu D, Zheng W, Cai H, Xiang YB, Li H, Gao YT, Shu XO. Long-term Diet Quality and Risk of Type 2 Diabetes Among Urban Chinese Adults. *Diabetes Care* 2018 Apr;41(4):723-30.
- (416) Davison KM, Temple NJ. Cereal fiber, fruit fiber, and type 2 diabetes: Explaining the paradox. *J Diabetes Complications* 2018 Feb;32(2):240-5.
- (417) Chen Z, Zuurmond MG, van der SN, Nano J, Wijnhoven HAH, Ikram MA, Franco OH, Voortman T. Plant versus animal based diets and insulin resistance, prediabetes and type 2 diabetes: the Rotterdam Study. *European Journal of Epidemiology* 2018;33(9):883-93.
- (418) Lee HA, Son N, Lee WK, Park H. A Diabetes-Related Dietary Pattern Is Associated with Incident Diabetes in Obese Men in the Korean Genome Epidemiology Study. *J Nutr* 2018 Dec 22;149(2):323-9.
- (419) Ibarrola-Jurado N, Salas-Salvado J, Gonzalez M, Bullo M. Dietary phylloquinone intake and risk of type 2 diabetes in elderly subjects at high risk cardiovascular disease. *Obesity Facts Conference: 2019*;May.
- (420) Bo S, Pisu E. Role of dietary magnesium in cardiovascular disease prevention, insulin sensitivity and diabetes. *Current Opinion in Lipidology* 2019;(1):February.
- (421) Stern D, Mazariegos M, Ortiz-Panozo E, Campos H, Malik VS, Lajous M, Lopez-Ridaura R. Sugar-Sweetened Soda Consumption Increases Diabetes Risk Among Mexican Women. *J Nutr* 2019 May 1;149(5):795-803.
- (422) Esfandiari Z, Hosseini-Esfahani F, Mirmiran P, Yuzbashian E, Azizi F. The Association of Dietary Polyphenol Intake with the Risk of Type 2 Diabetes: Tehran Lipid and Glucose Study. *Diabetes Metab Syndr Obes* 2020;13:1643-52.
- (423) Laouali N, Berrandou T, Rothwell A, Shah S, El FD, Romana MF, Boutron-Ruault MC, Fagherazzi G. Profiles of Polyphenol Intake and Type 2 Diabetes Risk in 60,586 Women Followed for 20 Years: Results from the E3N Cohort Study. *Nutrients* 2020 Jun 29;12(7).
- (424) Zheng JS, Sharp SJ, Imamura F, Chowdhury R, Gundersen TE, Steur M, Sluijs I, van der Schouw YT, Agudo A, Aune D, Barricarte A, Boeing H, et al. Association of plasma biomarkers of fruit and vegetable intake with incident type 2 diabetes: EPIC-InterAct case-cohort study in eight European countries. *BMJ* 2020 Jul 8;370:m2194.
- (425) Madan J, Battalwar R, Narsaria A, Malandkar A, Nadkarni V. Prevalence of metabolic syndrome in indian adults from mumbai city and its correlation to their dietary pattern. *Annals of Nutrition and Metabolism Conference: 1920*;(var.pagings):2013.
- (426) Sargeant LA, Khaw KT, Bingham S, Day NE, Luben RN, Oakes S, Welch A, Wareham NJ. Fruit and vegetable intake and population glycosylated haemoglobin levels: The EPIC-Norfolk study. *European Journal of Clinical Nutrition* 2001;55(5):342-8.
- (427) Woo J, Ho SC, Sham A, Sea MM, Lam KS, Lam TH, Janus ED. Diet and glucose tolerance in a Chinese population. *Eur J Clin Nutr* 2003 Apr;57(4):523-30.
- (428) Freire RD, Cardoso MA, Gimeno SGA, Ferreira SRG. Dietary fat is associated with metabolic syndrome in Japanese Brazilians. *Diabetes Care* 2005;28(7):1779-85.
- (429) Zhang C, Liu S, Solomon CG, Hu FB. Dietary fiber intake, dietary glycemic load, and the risk for gestational diabetes mellitus. *Diabetes Care* 2006 Oct;29(10):2223-30.
- (430) Shin A, Lim SY, Sung J, Shin HR, Kim J. Dietary intake, eating habits, and metabolic syndrome in Korean men. *J Am Diet Assoc* 2009 Apr;109(4):633-40.



- (431) Chen L, Hu FB, Yeung E, Willett WC, Cui Z. A prospective study of pre-gravid consumption of sugar-sweetened beverages and the risk of gestational diabetes mellitus. Diabetes Conference: 69th Annual Meeting of the American Diabetes Association New Orleans, LA United States Conference Publication 2009;58 (SUPPL.1A).
- (432) Chen L, Zhang C, Yeung E, Nansel TR, Willett WC, Hu FB. A prospective study of pre-gravid consumption of fruits and vegetables and the risk of gestational diabetes mellitus. Diabetes Conference: 69th Annual Meeting of the American Diabetes Association New Orleans, LA United States Conference Publication 2009;58 (SUPPL.1A):2009.
- (433) Jing X, Qiao R, Li M, Liu X, Kang D, Huang C. [Gestational diabetes mellitus and the lifestyle and dietary structure of pregnant women: a case-control study]. Wei Sheng Yan Jiu 2010 Mar;39(2):209-11, 227.
- (434) Liu L, Nunez AE. Cardiometabolic syndrome and its association with education, smoking, diet, physical activity, and social support: findings from the Pennsylvania 2007 BRFSS Survey. J Clin Hypertens (Greenwich ) 2010 Jul 1;12(7):556-64.
- (435) Kaur P, Radhakrishnan E, Rao SR, Sankarasubbaiyan S, Rao TV, Gupte MD. The metabolic syndrome and associated risk factors in an urban industrial male population in South India. J Assoc Physicians India 2010 Jun;58:363-6, 371.
- (436) Ros E, Tapsell LC, Sabate J. Nuts and berries for heart health. Current Atherosclerosis Reports 2010;12(6):397-406.
- (437) Shi L, Morrison JA, Wiecha J, Horton M, Hayman LL. Healthy lifestyle factors associated with reduced cardiometabolic risk. Br J Nutr 2011 Mar;105(5):747-54.
- (438) Jing X-F, Qiao R, Li M, Kang D-Y, Liu X-H, Huang C-Y. Developing a risk appraisal model for gestational diabetes mellitus. [Chinese]. Journal of Sichuan University (Medical Science Edition) 2011;42(3):353-7.
- (439) Middleton PF, Collins CT, Crowther CA, Flenady V, Makrides M, Rumbold A, Zhou SJ. Dietary influences on diabetes in pregnancy: A systematic review. Journal of Paediatrics and Child Health Conference: 15th Annual Congress of the Perinatal Society of Australia and New Zealand, PSANZ 2011;April.
- (440) Prasad DS, Kabir Z, Dash AK, Das BC. Prevalence and risk factors for metabolic syndrome in Asian Indians: A community study from urban Eastern India. J Cardiovasc Dis Res 2012 Jul;3(3):204-11.
- (441) Jaaskelainen P, Magnussen CG, Pahkala K, Mikkila V, Kahonen M, Sabin MA, Fogelholm M, Hutri-Kahonen N, Taittonen L, Telama R, Laitinen T, Jokinen E, et al. Childhood nutrition in predicting metabolic syndrome in adults: the cardiovascular risk in Young Finns Study. Diabetes Care 2012 Sep;35(9):1937-43.
- (442) Chen L, Hu FB, Yeung E, Tobias DK, Willett WC, Zhang C. Prepregnancy consumption of fruits and fruit juices and the risk of gestational diabetes mellitus: a prospective cohort study. Diabetes Care 2012 May;35(5):1079-82.
- (443) Heikkila HM, Schwab U, Krachler B, Mannikko R, Rauramaa R. Dietary associations with prediabetic states--the DR's EXTRA Study (ISRCTN45977199). Eur J Clin Nutr 2012 Jul;66(7):819-24.
- (444) Simpson EJ, Brown SJ, Mendis B, Dunlop M, Marshall M, Macdonald IA. The effect of daily orange juice consumption on insulin sensitivity and indices of the metabolic syndrome. Proceedings of the Nutrition Society Conference: Summer Meeting of the Nutrition Society Hosted by the Irish Section 2012;2012.
- (445) Mattei J, Malik V, Hu FB, Campos H. Substituting homemade fruit juice for sugar-sweetened beverages is associated with lower odds of metabolic syndrome among hispanic adults. Circulation Conference: Epidemiology and Prevention/Physical Activity, Nutrition and Metabolism 2012;13.
- (446) Wallace IR, McEvoy CT, Hunter SJ, Hamill LL, Ennis CN, Bell PM, Patterson CC, Woodside JV, Young IS, McKinley MC. Dose-response effect of fruit and vegetables



- on insulin resistance in people at high risk of cardiovascular disease: a randomized controlled trial. *Diabetes Care* 2013 Dec;36(12):3888-96.
- (447) Carter P, Gray LJ, Talbot D, Morris DH, Khunti K, Davies MJ. Fruit and vegetable intake and the association with glucose parameters: a cross-sectional analysis of the Let's Prevent Diabetes Study. *Eur J Clin Nutr* 2013 Jan;67(1):12-7.
- (448) Iraj B, Heidari-Beni M, Bakhtiari-Broujeni M, Ebneshahidi A, Amini M, Ghiasvand R, Askari G. Effect of potato consumption as a high glycemic index food on pre-diabetes adult patients. *Pakistan Journal of Medical Sciences* 2013;29 (1 SUPPL.):412-7.
- (449) Doupis J, Kokkinos A, Doupis C, Andrianesis V, Trikola A, Perrea D, Katsilambros N, Tentolouris N. Exercise prevents dysglycemia in young age. *Diabetes Conference: 73rd Scientific Sessions of the American Diabetes Association Chicago, IL United States Conference Publication* 2013;62 (SUPPL.1):A632-A633.
- (450) Heikkila HM, Krachler B, Rauramaa R, Schwab US. Diet, insulin secretion and insulin sensitivity--the Dose-Responses to Exercise Training (DR's EXTRA) Study (ISRCTN45977199). *Br J Nutr* 2014 Nov 14;112(9):1530-41.
- (451) Feng L, Li P, Wang X, Hu Z, Ma Y, Tang W, Ben Y, Mahapatra T, Cao X, Mahapatra S, Ling M, Gou A, et al. Distribution and determinants of non communicable diseases among elderly Uyghur ethnic group in Xinjiang, China. *PLoS One* 2014;9(8):e105536.
- (452) Cook LT, O'Reilly GA, Goran MI, Weigensberg MJ, Spruijt-Metz D, Davis JN. Vegetable consumption is linked to decreased visceral and liver fat and improved insulin resistance in overweight Latino youth. *J Acad Nutr Diet* 2014 Nov;114(11):1776-83.
- (453) Dussaillant C, Echeverria G, Villarroel L, Marin PP, Rigotti A. [UNHEALTHY FOOD INTAKE IS LINKED TO HIGHER PREVALENCE OF METABOLIC SYNDROME IN CHILEAN ADULT POPULATION: CROSS SECTIONAL STUDY IN 2009-2010 NATIONAL HEALTH SURVEY]. *Nutr Hosp* 2015 Nov 1;32(5):2098-104.
- (454) Zheng R, Yang M, Bao Y, Li H, Shan Z, Zhang B, Liu J, Lv Q, Wu O, Zhu Y, Lai M. Prevalence and Determinants of Metabolic Health in Subjects with Obesity in Chinese Population. *Int J Environ Res Public Health* 2015 Oct 28;12(11):13662-77.
- (455) Gadiraju TV, Patel Y, Gaziano JM, Djousse L. Fried Food Consumption and Cardiovascular Health: A Review of Current Evidence. *Nutrients* 2015 Oct 6;7(10):8424-30.
- (456) Helm L, Macdonald IA. Impact of beverage intake on metabolic and cardiovascular health. *Nutr Rev* 2015 Sep;73 Suppl 2:120-9.
- (457) Grosso G, Stepaniak U, Micek A, Topor-Madry R, Stefler D, Szafraniec K, Bobak M, Pajak A. A Mediterranean-type diet is associated with better metabolic profile in urban Polish adults: Results from the HAPIEE study. *Metabolism* 2015 Jun;64(6):738-46.
- (458) Penczynski K, Krupp D, Bolzenius K, Wudy S, Remer T, Buyken A. Pubertal flavonoid intake from fruit and vegetables in relation to adult type 2 diabetes markers. *Annals of Nutrition and Metabolism Conference: 12th European Nutrition Conference, FENS 2015;October.*
- (459) Zhang CX, Lu Y. A prospective study of vegetable and fruit intake during pregnancy and the risk of gestational diabetes mellitus. *Annals of Nutrition and Metabolism Conference: 12th European Nutrition Conference, FENS 2015;October.*
- (460) Ma J, Jacques PF, Meigs JB, Fox CS, Rogers GT, Smith CE, Hruby A, Saltzman E, McKeown NM. Sugar-Sweetened Beverage but Not Diet Soda Consumption Is Positively Associated with Progression of Insulin Resistance and Prediabetes. *J Nutr* 2016 Dec;146(12):2544-50.
- (461) Wesonga R, Guwatudde D, Bahendeka SK, Mutungi G, Nabugoomu F, Muwonge J. Burden of cumulative risk factors associated with non-communicable diseases among adults in Uganda: evidence from a national baseline survey. *Int J Equity Health* 2016 Dec 1;15(1):195.

- (462) Chang SH, Chen MC, Chien NH, Wu LY. CE: Original Research: Examining the Links Between Lifestyle Factors and Metabolic Syndrome. *Am J Nurs* 2016 Dec;116(12):26-36.
- (463) Mattei J, Sotres-Alvarez D, Daviglius ML, Gallo LC, Gellman M, Hu FB, Tucker KL, Willett WC, Siega-Riz AM, Van HL, Kaplan RC. Diet Quality and Its Association with Cardiometabolic Risk Factors Vary by Hispanic and Latino Ethnic Background in the Hispanic Community Health Study/Study of Latinos. *J Nutr* 2016 Oct;146(10):2035-44.
- (464) Ferreira-Pego C, Babio N, Bes-Rastrollo M, Corella D, Estruch R, Ros E, Fito M, Serra-Majem L, Aros F, Fiol M, Santos-Lozano JM, Munoz-Bravo C, et al. Frequent Consumption of Sugar- and Artificially Sweetened Beverages and Natural and Bottled Fruit Juices Is Associated with an Increased Risk of Metabolic Syndrome in a Mediterranean Population at High Cardiovascular Disease Risk. *J Nutr* 2016 Aug;146(8):1528-36.
- (465) Castro-Acosta ML, Lenihan-Geels GN, Corpe CP, Hall WL. Berries and anthocyanins: promising functional food ingredients with postprandial glycaemia-lowering effects. *Proc Nutr Soc* 2016 Aug;75(3):342-55.
- (466) Donin AS, Dent JE, Nightingale CM, Sattar N, Owen CG, Rudnicka AR, Perkin MR, Stephen AM, Jebb SA, Cook DG, Whincup PH. Fruit, vegetable and vitamin C intakes and plasma vitamin C: cross-sectional associations with insulin resistance and glycaemia in 9-10 year-old children. *Diabet Med* 2016 Mar;33(3):307-15.
- (467) Tryggvadottir EA, Medek H, Birgisdottir BE, Geirsson RT, Gunnarsdottir I. Association between healthy maternal dietary pattern and risk for gestational diabetes mellitus. *European Journal of Clinical Nutrition* 2016;70(2):237-42.
- (468) Bajaber AS, Abdelkarem HM, El-Mommtan AM. Dietary approach and its relationship with metabolic syndrome components. *International Journal of PharmTech Research* 2016;9(8):237-46.
- (469) Safabakhsh M, Koohdani F, Bagheri F, Siassi F, Khajehnasiri F, Sotoudeh G. Fruit and vegetable intake and pre-diabetes: a case-control study. *Eur J Nutr* 2017 Dec 4;57(8):2953-62.
- (470) VanWormer JJ, Boucher JL, Sidebottom AC, Sillah A, Knickelbine T. Lifestyle changes and prevention of metabolic syndrome in the Heart of New Ulm Project. *Prev Med Rep* 2017 Jun;6:242-5.
- (471) Huang WQ, Lu Y, Xu M, Huang J, Su YX, Zhang CX. Excessive fruit consumption during the second trimester is associated with increased likelihood of gestational diabetes mellitus: a prospective study. *Sci Rep* 2017 Mar 8;7:43620.
- (472) Setayeshgar S, Ekwaru JP, Maximova K, Majumdar SR, Storey KE, McGavock J, Veugelers PJ. Dietary intake and prospective changes in cardiometabolic risk factors in children and youth. *Appl Physiol Nutr Metab* 2017 Jan;42(1):39-45.
- (473) Ikeda K, Sato T, Nakayama T, Tanaka D, Nagashima K, Mano F, Joo E, Fujimoto S, Takahashi Y, Kosugi S, Sekine A, Tabara Y, et al. Dietary habits associated with reduced insulin resistance: The Nagahama study. *Diabetes Res Clin Pract* 2018 Jul;141:26-34.
- (474) Mercier R, Perron J, Weisnagel SJ, Robitaille J. Associations between fruit and vegetables intake and abnormal glucose tolerance among women with prior gestational diabetes mellitus. *Eur J Nutr* 2018 Mar 22.
- (475) Zareei S, Homayounfar R, Naghizadeh MM, Ehrampoush E, Rahimi M. Dietary pattern in pregnancy and risk of gestational diabetes mellitus (GDM). *Diabetes and Metabolic Syndrome: Clinical Research and Reviews* 2018;12(3):399-404.
- (476) Hosseinpour-Niazi S, Bakhshi B, Betru E, Mirmiran P, Darand M, Azizi F. Prospective study of total and various types of vegetables and the risk of metabolic syndrome among children and adolescents. *World J Diabetes* 2019 Jun 15;10(6):362-75.

- (477) Su J, Qin Y, Pan X, Sfieri C, Geo Y, Pan E, Zhang Y, Zhou J, Wu M. Association between fresh fruit consumption and glycemic control in patients with type 2 diabetes. [Chinese]. *Chinese Journal of Endemiology* 2019;40(6):660-5.
- (478) Yamamoto J, Ishihara J, Kotemori A, Yoshizaki T, Goto A, Mizoue T, Noda M, Sawada N, Tsugane S. Association between Okinawan vegetables consumption and risk of type 2 diabetes in Japanese communities: The JPHC Study. *J Epidemiol* 2019 May 11;30(5):227-35.
- (479) Srour B, Fezeu LK, Kesse-Guyot E, Alles B, Debras C, Druesne-Pecollo N, Chazelas E, Deschasaux M, Hercberg S, Galan P, Monteiro CA, Julia C, et al. Ultraprocessed Food Consumption and Risk of Type 2 Diabetes among Participants of the NutriNet-Sante Prospective Cohort. *JAMA Internal Medicine* 2020;180(2):283-91.
- (480) Gomes-Neto AW, Oste MCJ, Sotomayor CG, Berg VD, Geleijnse JM, Gans ROB, Bakker SJL, Navis GJ. Fruit and Vegetable Intake and Risk of Posttransplantation Diabetes in Renal Transplant Recipients. *Diabetes Care* 2019 Sep;42(9):1645-52.
- (481) Hamel C, Stevens A, Singh K, Ansari MT, Myers E, Ziegler P, Hutton B, Sharma A, Bjerre LM, Fenton S, Lau DC, O'Hara K, et al. Do sugar-sweetened beverages cause adverse health outcomes in adults? A systematic review protocol. *Syst Rev* 2014 Sep 23;3:108.
- (482) Moy FM, Hoe VC, Hairi NN, Buckley B, Wark PA, Koh D, Bueno-de-Mesquita HB, Bulgiba AM. Cohort study on clustering of lifestyle risk factors and understanding its association with stress on health and wellbeing among school teachers in Malaysia (CLUSTER)--a study protocol. *BMC Public Health* 2014 Jun 17;14:611.
- (483) Schwingshackl L, Chaimani A, Bechthold A, Iqbal K, Stelmach-Mardas M, Hoffmann G, Schwedhelm C, Schlesinger S, Boeing H. Food groups and risk of chronic disease: a protocol for a systematic review and network meta-analysis of cohort studies. *Syst Rev* 2016 Jul 27;5(1):125.
- (484) Jenkins DJ, Kendall CW, Marchie A, Jenkins AL, Augustin LS, Ludwig DS, Barnard ND, Anderson JW. Type 2 diabetes and the vegetarian diet. *Am J Clin Nutr* 2003 Sep;78(3 Suppl):610S-6S.
- (485) Schulze MB, Hu FB. Primary prevention of diabetes: what can be done and how much can be prevented? *Annu Rev Public Health* 2005;26:445-67.
- (486) Murakami K, Okubo H, Sasaki S. Effect of dietary factors on incidence of type 2 diabetes: a systematic review of cohort studies. *J Nutr Sci Vitaminol (Tokyo)* 2005 Aug;51(4):292-310.
- (487) Costacou T. Evaluation of epidemiologic evidence on the role of nutrition in the development of diabetes and its complications. *Current Diabetes Reports* 2005;5(5):366-73.
- (488) Sartorelli DS, Cardoso MA. [Association between dietary carbohydrates and type 2 diabetes mellitus: epidemiological evidence]. *Arq Bras Endocrinol Metabol* 2006 Jun;50(3):415-26.
- (489) Everitt AV, Hilmer SN, Brand-Miller JC, Jamieson HA, Truswell AS, Sharma AP, Mason RS, Morris BJ, Le Couteur DG. Dietary approaches that delay age-related diseases. *Clin Interv Aging* 2006;1(1):11-31.
- (490) Weickert MO, Pfeiffer AF. Metabolic effects of dietary fiber consumption and prevention of diabetes. *J Nutr* 2008 Mar;138(3):439-42.
- (491) Laville M, Nazare JA. Diabetes, insulin resistance and sugars. *Obes Rev* 2009 Mar;10 Suppl 1:24-33.
- (492) Schlienger JL, Pradignac A. [Nutrition approaches to prevent chronic disease]. *Rev Prat* 2009 Jan 20;59(1):61-5.
- (493) Fraser GE. Vegetarian diets: what do we know of their effects on common chronic diseases? *Am J Clin Nutr* 2009 May;89(5):1607S-12S.
- (494) Hu FB, Malik VS. Sugar-sweetened beverages and risk of obesity and type 2 diabetes: epidemiologic evidence. *Physiol Behav* 2010 Apr 26;100(1):47-54.

- (495) Martinez-Gonzalez MA, de IF-A, Lopez-Del-Burgo C, Vazquez-Ruiz Z, Benito S, Ruiz-Canela M. Low consumption of fruit and vegetables and risk of chronic disease: a review of the epidemiological evidence and temporal trends among Spanish graduates. *Public Health Nutr* 2011 Dec;14(12A):2309-15.
- (496) Akesson A, Andersen LF, Kristjansdottir AG, Roos E, Trolle E, Voutilainen E, Wirfalt E. Health effects associated with foods characteristic of the Nordic diet: a systematic literature review. *Food Nutr Res* 2013 Oct 9;57:doi: 10.3402/fnr.v57i0.22790.
- (497) Pereira MA. Diet beverages and the risk of obesity, diabetes, and cardiovascular disease: a review of the evidence. *Nutr Rev* 2013 Jul;71(7):433-40.
- (498) Anderson JW, Waters AR. Raisin consumption by humans: effects on glycemia and insulinemia and cardiovascular risk factors. *J Food Sci* 2013 Jun;78 Suppl 1:A11-A17.
- (499) Hu FB. Resolved: there is sufficient scientific evidence that decreasing sugar-sweetened beverage consumption will reduce the prevalence of obesity and obesity-related diseases. *Obes Rev* 2013 Aug;14(8):606-19.
- (500) Hartley L, Igbinedion E, Holmes J, Flowers N, Thorogood M, Clarke A, Stranges S, Hooper L, Rees K. Increased consumption of fruit and vegetables for the primary prevention of cardiovascular diseases. *The Cochrane database of systematic reviews* 2013;6:CD009874.
- (501) rdisson Korat AV, Willett WC, Hu FB. Diet, lifestyle, and genetic risk factors for type 2 diabetes: a review from the Nurses' Health Study, Nurses' Health Study 2, and Health Professionals' Follow-up Study. *Curr Nutr Rep* 2014 Dec 1;3(4):345-54.
- (502) Ley SH, Hamdy O, Mohan V, Hu FB. Prevention and management of type 2 diabetes: dietary components and nutritional strategies. *Lancet* 2014 Jun 7;383(9933):1999-2007.
- (503) Bray GA, Popkin BM. Dietary sugar and body weight: have we reached a crisis in the epidemic of obesity and diabetes?: health be damned! Pour on the sugar. *Diabetes Care* 2014 Apr;37(4):950-6.
- (504) Esposito K, Giugliano D. Mediterranean diet and type 2 diabetes. *Diabetes Metab Res Rev* 2014 Mar;30 Suppl 1:34-40.
- (505) Grodstein F. Nutrition and prevention. *Alzheimer's and Dementia Conference: Alzheimer's Association International Conference 2014;July.*
- (506) Dussallant C, Echeverria G, Urquiaga I, Velasco N, Rigotti A. [Current evidence on health benefits of the mediterranean diet]. *Rev Med Chil* 2016 Aug;144(8):1044-52.
- (507) Khan TA, Sievenpiper JL. Controversies about sugars: results from systematic reviews and meta-analyses on obesity, cardiometabolic disease and diabetes. *Eur J Nutr* 2016 Nov;55(Suppl 2):25-43.
- (508) Thibault V, Belanger M, LeBlanc E, Babin L, Halpine S, Greene B, Mancuso M. Factors that could explain the increasing prevalence of type 2 diabetes among adults in a Canadian province: a critical review and analysis. *Diabetol Metab Syndr* 2016;8:71.
- (509) Borch D, Juul-Hindsgaul N, Veller M, Astrup A, Jaskolowski J, Raben A. Potatoes and risk of obesity, type 2 diabetes, and cardiovascular disease in apparently healthy adults: a systematic review of clinical intervention and observational studies. *Am J Clin Nutr* 2016 Aug;104(2):489-98.
- (510) Boni R. [What is the Optimal Nutrition for Humans?]. *Praxis (Bern 1994 )* 2016 Apr 27;105(9):517-21.
- (511) Li Y, Wang DD, Ley SH, Vasanti M, Howard AG, He Y, Hu FB. Time Trends of Dietary and Lifestyle Factors and Their Potential Impact on Diabetes Burden in China. *Diabetes Care* 2017 Dec;40(12):1685-94.
- (512) Hoare E, Varsamis P, Owen N, Dunstan DW, Jennings GL, Kingwell BA. Sugar- and Intense-Sweetened Drinks in Australia: A Systematic Review on Cardiometabolic Risk. *Nutrients* 2017 Sep 28;9(10):1075.
- (513) McMacken M, Shah S. A plant-based diet for the prevention and treatment of type 2 diabetes. *J Geriatr Cardiol* 2017 May;14(5):342-54.
- (514) Kuzma JN, Schmidt KA, Kratz M. Prevention of metabolic diseases: fruits (including fruit sugars) vs. vegetables. *Curr Opin Clin Nutr Metab Care* 2017 Jul;20(4):286-93.

- (515) Fardet A, Richonnet C, Mazur A. Association between consumption of fruit or processed fruit and chronic diseases and their risk factors: a systematic review of meta-analyses. *Nutr Rev* 2019 Apr 17;77(6):376-87.
- (516) Mello VD, Laaksonen DE. [Dietary fibers: current trends and health benefits in the metabolic syndrome and type 2 diabetes]. *Arq Bras Endocrinol Metabol* 2009 Jul;53(5):509-18.
- (517) Micha R, Shulkin ML, Penalvo JL, Khatibzadeh S, Singh GM, Rao M, Fahimi S, Powles J, Mozaffarian D. Etiologic effects and optimal intakes of foods and nutrients for risk of cardiovascular diseases and diabetes: Systematic reviews and meta-analyses from the Nutrition and Chronic Diseases Expert Group (NutriCoDE). *PLoS One* 2017;12(4):e0175149.
- (518) Fresan U, Gea A, Bes-Rastrollo M, Basterra-Gortari FJ, Carlos S, Martinez-Gonzalez MA. Substitution of water or fresh juice for bottled juice and type 2 diabetes incidence: The SUN cohort study. *Nutr Metab Cardiovasc Dis* 2017 Oct;27(10):874-80.
- (519) Roediger MA, Marucci MFN, Gobbo LA, Dourado DAQS, Santos JLF, Duarte YAO, Lebrao ML. Reported diabetes mellitus: incidence and determinants in cohort of community dwelling elderly people in Sao Paulo City, Brazil: SABE study, health, wellness and aging. *Cien Saude Colet* 2018 Nov;23(11):3913-22.
- (520) Choi Y, Larson N, Gallaher DD, Odegaard AO, Rana JS, Shikany JM, Steffen LM, Jacobs DR, Jr. A Shift Toward a Plant-Centered Diet From Young to Middle Adulthood and Subsequent Risk of Type 2 Diabetes and Weight Gain: The Coronary Artery Risk Development in Young Adults (CARDIA) Study. *Diabetes Care* 2020 Aug 26 [Epub ahead of print].



**Supplemental Table 3.** Serving sizes

| Exposure                       | Serving size<br>(g/d) <sup>a</sup> | Serving size<br>(g/d) <sup>b</sup> |
|--------------------------------|------------------------------------|------------------------------------|
| Main exposures                 |                                    |                                    |
| Fruit and vegetables           |                                    |                                    |
| Fruits                         | -                                  | 80                                 |
| Vegetables                     | -                                  | 80                                 |
| Subtypes of fruit              |                                    |                                    |
| Apples                         | 138                                | -                                  |
| Apples and pears               | 138                                | -                                  |
| Bananas                        | 114                                | -                                  |
| Berries                        | -                                  | 75                                 |
| Blueberries                    | -                                  | 70                                 |
| Cantaloupe                     | 134                                | -                                  |
| Citrus fruits                  | -                                  | 110                                |
| Fruit drinks                   | -                                  | 250                                |
| Fruit juice                    | -                                  | 250                                |
| 100% fruit juice               | -                                  | 250                                |
| Grapefruit                     | 120                                | -                                  |
| Grapes and raisins             | -                                  | 49                                 |
| Oranges                        | 131                                | -                                  |
| Peaches, plums and apricots    | 87                                 | -                                  |
| Prunes                         | -                                  | 85                                 |
| Strawberries                   | 75                                 | -                                  |
| Watermelon                     | -                                  | 286                                |
| Subtypes of vegetables         |                                    |                                    |
| Allium vegetables              | -                                  | 160                                |
| Boiled potato                  | -                                  | 202                                |
| Broccoli                       | 78                                 | -                                  |
| Brussel sprouts                | 78                                 | -                                  |
| Cabbage                        | 68                                 | -                                  |
| Cauliflower                    | 62                                 | -                                  |
| Cruciferous vegetables         | -                                  | 72                                 |
| Green leafy vegetables         | -                                  | 73                                 |
| Kale, mustard and chard greens | -                                  | 73                                 |
| Mushrooms                      | -                                  | 30                                 |
| Potatoes                       | 202                                | -                                  |
| Tomatoes                       | 122                                | -                                  |
| Yellow vegetables              | -                                  | 93                                 |

<sup>a</sup> Serving sizes retrieved from Lee et al. (2009)<sup>b</sup> Estimated values based on Lee et al. (2009)

Lee, J. E., Mannisto, S., Spiegelman, D., Hunter, D. J., Bernstein, L., van den Brandt, P. A., . . . Smith-Warner, S. A. (2009). Intakes of fruit, vegetables, and carotenoids and renal cell cancer risk: a pooled analysis of 13 prospective studies. *Cancer Epidemiol Biomarkers Prev*, 18(6), 1730-1739. doi:10.1158/1055-9965.epi-09-0045

**Supplemental Table 4.** Cohort studies of fruit and vegetables and type 2 diabetes

| Author, publication year, country | Study name or description                                | Follow-up period                             | Study size, gender, age, number of cases       | Dietary assessment                    | Outcome assessment                                     | Exposure                                                                                | Quantity                                                                                                                                   | RR (95% CI)                                                                                                                                                                                                                                                                      | Adjustment for confounders                                                                                                                                                              |
|-----------------------------------|----------------------------------------------------------|----------------------------------------------|------------------------------------------------|---------------------------------------|--------------------------------------------------------|-----------------------------------------------------------------------------------------|--------------------------------------------------------------------------------------------------------------------------------------------|----------------------------------------------------------------------------------------------------------------------------------------------------------------------------------------------------------------------------------------------------------------------------------|-----------------------------------------------------------------------------------------------------------------------------------------------------------------------------------------|
| Ford ES et al, 2000, USA          | NHANES I Epidemiologic Follow-Up Study                   | 1971-1975 to 1992-1993, 15.8 years follow-up | 9665 participants, age 25-74 years, 1018 cases | Single 24-hour dietary recall         | Self-report, hospitalization record, death certificate | Fruit and vegetable (total)<br>Fruit and vegetable (men)<br>Fruit and vegetable (women) | 0 serv/d<br>1-4<br>≥5<br>0 serv/d<br>1-4<br>≥5<br>0 serv/d<br>1-4<br>≥5                                                                    | 1.00<br>1.01 (0.78, 1.29)<br>0.79 (0.59, 1.06)<br>1.00<br>1.23 (0.76, 1.99)<br>1.14 (0.67, 1.93)<br>1.00<br>0.85 (0.62, 1.16)<br>0.61 (0.42, 0.88)                                                                                                                               | Age, sex, smoking, systolic blood pressure, cholesterol concentration, use of antihypertensive medication, recreational exercise, nonrecreational activity, alcohol use, BMI, education |
| Meyer KA et al, 2000, USA         | Iowa Women's Health Study (IWHS)                         | 1986-1992, 6 years follow-up                 | 35 988 women, age 55-69 years, 1141 cases      | Validated FFQ, 127 items              | Self-reported, validated by physician/medical records  | Total fruit and vegetable<br>Total fruit<br>Total vegetable                             | 18.0 serv/wk<br>27.0<br>35.0<br>44.0<br>62.0<br>4.0 serv/wk<br>8.5<br>12.0<br>16.0<br>23.5<br>11.0 serv/wk<br>17.0<br>22.0<br>28.5<br>41.5 | 1.00<br>1.00 (0.82, 1.22)<br>1.12 (0.92, 1.36)<br>1.21 (0.99, 1.49)<br>1.05 (0.84, 1.31)<br>1.00<br>1.05 (0.87, 1.26)<br>1.00 (0.82, 1.22)<br>1.08 (0.88, 1.32)<br>1.14 (0.93, 1.39)<br>1.00<br>1.03 (0.85, 1.24)<br>0.99 (0.82, 1.21)<br>1.09 (0.90, 1.34)<br>1.07 (0.86, 1.32) | Age, total energy intake, BMI, WHR, education, smoking, alcohol intake, physical activity                                                                                               |
| Knekt P et al, 2002, Finland      | Finnish Mobile Clinic Health Examination Survey (FMCHES) | 1966-1972 to 1994, 28 years follow-up        | 9878 participants, age >15 years, 526 cases    | Dietary history interview, >100 items | Linkage to the Social Insurance Institution            | Apple                                                                                   | >47 vs. 0 g/d                                                                                                                              | 0.73 (0.57, 0.92)                                                                                                                                                                                                                                                                | Sex, age, intakes of vegetables and fruit other than apples                                                                                                                             |

|                                 |                                             |                                |                                                 |                                            |                                   |                                                                                                                                                                                                      |                                                                                                                                                                                                                                          |                                                                                                                                                                                                                                                                                                                                                                                                                                                                          |                                                                                                                                                           |
|---------------------------------|---------------------------------------------|--------------------------------|-------------------------------------------------|--------------------------------------------|-----------------------------------|------------------------------------------------------------------------------------------------------------------------------------------------------------------------------------------------------|------------------------------------------------------------------------------------------------------------------------------------------------------------------------------------------------------------------------------------------|--------------------------------------------------------------------------------------------------------------------------------------------------------------------------------------------------------------------------------------------------------------------------------------------------------------------------------------------------------------------------------------------------------------------------------------------------------------------------|-----------------------------------------------------------------------------------------------------------------------------------------------------------|
| Hodge AM et al, 2004, Australia | Melbourne Collaborative Cohort Study (MCCS) | 1990-1994, 4 years follow-up   | 31 641 participants, age 27-75 years, 365 cases | Self-administered FFQ, 121 items           | Self-reported/doctor confirmation | Vegetable<br><br><br><br>Potato<br><br><br><br>Fruit                                                                                                                                                 | <3.0 times/d<br>3.0-4.9<br>5.0-6.9<br>≥7.0<br>Increase of 1 time/wk<br><2.0 times/wk<br>2.0-3.9<br>4.0-6.4<br>≥6.5<br>Increase of 1 time/wk<br><2.0 times/d<br>2.0-3.9<br>4.0-5.9<br>>6.0<br>Increase of 1 time/wk                       | 1.00<br>1.09 (0.78, 1.54)<br>0.97 (0.68, 1.39)<br>0.88 (0.60, 1.28)<br>0.97 (0.91, 1.03)<br>1.00<br>0.84 (0.63, 1.12)<br>0.82 (0.60, 1.12)<br>0.98 (0.70, 1.37)<br>0.99 (0.94, 1.04)<br>1.00<br>0.81 (0.59, 1.12)<br>0.82 (0.58, 1.16)<br>0.85 (0.59, 1.22)<br>0.99 (0.93, 1.04)                                                                                                                                                                                         | Age, sex, country of birth, physical activity, family history of diabetes, alcohol, education, weight change in the last 5 years, energy intake, BMI, WHR |
| Liu S et al, 2004, USA          | Women's Health Study (WHS)                  | 1993-2003, 8.8 years follow-up | 38 018 women, age ≥45 years, 1614 cases         | Validated semi-quantitative FFQ, 131 items | Self-reported/ADA criteria        | All fruits and vegetables<br><br><br><br><br><br><br>All fruits<br><br><br><br><br><br><br>All vegetables<br><br><br><br><br><br><br>Citrus fruits<br><br><br><br><br><br><br>Green leafy vegetables | 2.54 serv/d<br>4.13<br>5.49<br>7.09<br>10.16<br>0.62 serv/d<br>1.32<br>1.91<br>2.62<br>3.91<br>1.47 serv/d<br>2.49<br>3.40<br>4.58<br>6.84<br>0.07 serv/d<br>0.28<br>0.57<br>1.00<br>1.57<br>0.14 serv/d<br>0.35<br>0.56<br>0.92<br>1.42 | 1.00<br>1.03 (0.88, 1.20)<br>0.94 (0.79, 1.11)<br>0.93 (0.78, 1.10)<br>1.04 (0.87, 1.25)<br>1.00<br>0.93 (0.79, 1.09)<br>0.87 (0.74, 1.03)<br>0.94 (0.80, 1.11)<br>0.97 (0.82, 1.16)<br>1.00<br>1.01 (0.86, 1.19)<br>0.98 (0.83, 1.16)<br>0.99 (0.84, 1.18)<br>1.03 (0.86, 1.23)<br>1.00<br>1.06 (0.90, 1.24)<br>0.90 (0.76, 1.07)<br>1.14 (0.98, 1.34)<br>1.07 (0.90, 1.26)<br>1.00<br>0.92 (0.79, 1.08)<br>0.93 (0.79, 1.09)<br>0.84 (0.72, 0.99)<br>0.96 (0.81, 1.13) | Age, smoking, total calories, alcohol use, BMI, exercise, history of hypertension, history of high cholesterol and family history of diabetes             |

|                                 |                                          |                                       |                                          |                                             |                                                                                                                                             |                        |                                             |                                                                                          |                                                                                                                                                                                                                                                                                                                                                                            |
|---------------------------------|------------------------------------------|---------------------------------------|------------------------------------------|---------------------------------------------|---------------------------------------------------------------------------------------------------------------------------------------------|------------------------|---------------------------------------------|------------------------------------------------------------------------------------------|----------------------------------------------------------------------------------------------------------------------------------------------------------------------------------------------------------------------------------------------------------------------------------------------------------------------------------------------------------------------------|
|                                 |                                          |                                       |                                          |                                             |                                                                                                                                             | Cruciferous vegetables | 0.13 serv/d<br>0.21<br>0.35<br>0.57<br>1.00 | 1.00<br>0.91 (0.76, 1.09)<br>0.98 (0.84, 1.14)<br>0.96 (0.81, 1.14)<br>0.95 (0.80, 1.12) |                                                                                                                                                                                                                                                                                                                                                                            |
|                                 |                                          |                                       |                                          |                                             |                                                                                                                                             | Dark yellow vegetables | 0.07 serv/d<br>0.2<br>0.34<br>0.57<br>1.00  | 1.00<br>0.90 (0.76, 1.07)<br>0.89 (0.75, 1.07)<br>0.92 (0.76, 1.11)<br>0.81 (0.67, 0.98) |                                                                                                                                                                                                                                                                                                                                                                            |
|                                 |                                          |                                       |                                          |                                             |                                                                                                                                             | Potatoes               | 0.13 serv/d<br>0.28<br>0.43<br>0.56<br>0.93 | 1.00<br>1.03 (0.87, 1.22)<br>0.97 (0.79, 1.19)<br>0.96 (0.81, 1.13)<br>1.02 (0.86, 1.22) |                                                                                                                                                                                                                                                                                                                                                                            |
| Schulze M et al, 2004, USA      | Nurses' Health Study II (NHS II)         | 1991-1999, 7.8 years follow-up        | 91 249 women, age 24-44 years, 741 cases | Validated semi-quantitative FFQ, 133 items  | Self-reported/supplemental questionnaire/the National Diabetes Data group criteria (before 1997) or American Diabetes criteria (after 1998) | Fruit punch            | <1/mo<br>1-4/<br>2-6/wk<br>≥1/d             | 1.00<br>0.90 (0.68, 1.18)<br>1.15 (0.79, 1.66)<br>2.00 (1.33, 3.03)                      | Alcohol intake, physical activity, family history of diabetes, smoking, postmenopausal hormone use, oral contraceptive use, intake of cereal fiber, magnesium, trans-fat, and ratio of polyunsaturated to saturated fat; and consumption of sugar-sweetened soft drinks, diet soft drinks, fruit juice, and fruit punch (other than the main exposure, depending on model) |
| Montonen J et al, 2005, Finland | Finnish Mobile Clinic Health Examination | 1967-1972 to 1995, 23 years follow-up | 4304 participants, age 40-69             | Dietary history interview, > 100 food items | Linkage to the Social Insurance Institution                                                                                                 | Potato                 | <132 g/d<br>132-196<br>197-283<br>>283      | 1.00<br>1.09 (0.82, 1.46)<br>1.27 (0.94, 1.72)<br>1.42 (1.02, 1.98)                      | Age, sex, BMI, energy intake, smoking, family                                                                                                                                                                                                                                                                                                                              |

|                         |                            |                                |                                         |                                            |                                                                          |                           |                                    |                                                                     |                                      |                                                                                                                                                                                                    |
|-------------------------|----------------------------|--------------------------------|-----------------------------------------|--------------------------------------------|--------------------------------------------------------------------------|---------------------------|------------------------------------|---------------------------------------------------------------------|--------------------------------------|----------------------------------------------------------------------------------------------------------------------------------------------------------------------------------------------------|
|                         | Survey (FMCHES)            |                                | years, 383 cases                        |                                            |                                                                          | Vegetables                | <42 g/d<br>42-78<br>79-130<br>>130 | 1.00<br>0.75 (0.56, 1.00)<br>0.93 (0.70, 1.22)<br>0.77 (0.57, 1.03) | history of diabetes, geographic area |                                                                                                                                                                                                    |
|                         |                            |                                |                                         |                                            |                                                                          | Yellow and red vegetables | <19 g/d<br>19-41<br>42-77<br>>77   | 1.00<br>0.78 (0.59, 1.04)<br>0.90 (0.68, 1.18)<br>0.80 (0.60, 1.06) |                                      |                                                                                                                                                                                                    |
|                         |                            |                                |                                         |                                            |                                                                          | Green vegetables          | <11 g/d<br>11-24<br>25-43<br>>43   | 1.00<br>0.92 (0.71, 1.21)<br>0.91 (0.69, 1.20)<br>0.69 (0.50, 0.93) |                                      |                                                                                                                                                                                                    |
|                         |                            |                                |                                         |                                            |                                                                          | Other vegetables          | <1 g/d<br>1-3<br>4-10<br>>10       | 1.00<br>0.97 (0.73, 1.30)<br>0.94 (0.71, 1.24)<br>0.79 (0.58, 1.07) |                                      |                                                                                                                                                                                                    |
|                         |                            |                                |                                         |                                            |                                                                          | Fruits and berries        | <33 g/d<br>33-83<br>84-156<br>>156 | 1.00<br>0.77 (0.58, 1.02)<br>0.83 (0.63, 1.10)<br>0.69 (0.51, 0.92) |                                      |                                                                                                                                                                                                    |
|                         |                            |                                |                                         |                                            |                                                                          | Fruit                     | <20 g/d<br>20-66<br>67-138<br>>138 | 1.00<br>0.89 (0.67, 1.18)<br>0.88 (0.66, 1.17)<br>0.82 (0.61, 1.11) |                                      |                                                                                                                                                                                                    |
|                         |                            |                                |                                         |                                            |                                                                          | Berries                   | <4 g/d<br>4-10<br>11-20<br>>20     | 1.00<br>0.69 (0.53, 0.92)<br>0.65 (0.49, 0.87)<br>0.63 (0.47, 0.85) |                                      |                                                                                                                                                                                                    |
| Song Y et al, 2005, USA | Women's Health Study (WHS) | 1993-2003, 8.8 years follow-up | 38 018 women, age ≥45 years, 1614 cases | Validated semi-quantitative FFQ, 131 items | Self-reported, validated by supplementary questionnaire and ADA criteria | Broccoli                  | None<br>≤1 serv/wk<br>2-4<br>≥5    | 1.00<br>0.95 (0.77, 1.16)<br>0.94 (0.75, 1.18)<br>0.95 (0.69, 1.31) |                                      | Age, BMI, total energy intake, smoking, exercise, alcohol use, history of hypertension, history of high cholesterol, family history of diabetes, fiber intake, glycemic load, magnesium, total fat |
|                         |                            |                                |                                         |                                            |                                                                          | Apples                    | None<br>≤1 serv/wk<br>2-6<br>≥1/d  | 1.00<br>0.83 (0.70, 0.98)<br>0.73 (0.60, 0.88)<br>0.72 (0.55, 0.94) |                                      |                                                                                                                                                                                                    |
|                         |                            |                                |                                         |                                            |                                                                          | Onions                    | None<br>≤1 serv/wk<br>2-4<br>≥5    | 1.00<br>1.09 (0.97, 1.22)<br>1.10 (0.92, 1.33)<br>1.18 (0.94, 1.48) |                                      |                                                                                                                                                                                                    |



|                                 |                                                          |                                            |                                               |                                                 |                                                                                                                       |                                                               |                                                                                                 |                                                                                                                                                                 |                                                                                                                                                                                                                                                                                    |
|---------------------------------|----------------------------------------------------------|--------------------------------------------|-----------------------------------------------|-------------------------------------------------|-----------------------------------------------------------------------------------------------------------------------|---------------------------------------------------------------|-------------------------------------------------------------------------------------------------|-----------------------------------------------------------------------------------------------------------------------------------------------------------------|------------------------------------------------------------------------------------------------------------------------------------------------------------------------------------------------------------------------------------------------------------------------------------|
| Wang L et al, 2006, USA         | Women's Health Study (WHS)                               | 1992-2003, 10.2 years follow-up            | 35 783 women, age $\geq 45$ years, 1544 cases | Validated semi-quantitative FFQ, 131 food items | Self-reported, validated by supplementary questionnaire and ADA criteria                                              | Tomatoes<br><br>Tomato juice                                  | None<br>1-3 serv/mo<br>1-4 serv/wk<br>$\geq 5$<br>None<br>1-3 serv/mo<br>1 serv/wk<br>$\geq 2$  | 1.00<br>0.81 (0.64, 1.03)<br>0.94 (0.76, 1.17)<br>0.95 (0.74, 1.22)<br>1.00<br>1.00 (0.88, 1.13)<br>1.11 (0.94, 1.31)<br>0.93 (0.74, 1.15)                      | Age, energy, randomized treatment assignment, smoking, alcohol, exercise, family history of diabetes, post-menopause, postmenopausal hormone use, multivitamin use, BMI, history of hypertension, history of hypercholesterolemia                                                  |
| Montonen J et al, 2007, Finland | Finnish Mobile Clinic Health Examination Survey (FMCHES) | 1967-1972 to 1994-1995, 12 years follow-up | 4284 participants, age 40-69 years, 177 cases | Dietary history interview, >100 food items      | Linkage to the Social Insurance Institution                                                                           | Sweetened berry juice                                         | 0 g/d<br>7.5<br>21<br>51                                                                        | 1.00<br>0.68 (0.41, 1.14)<br>0.95 (0.60, 1.49)<br>1.56 (1.08, 2.26)                                                                                             | Age, sex, BMI, energy intake, smoking, geographic area, physical activity, family history of diabetes, prudent dietary pattern score, conservative pattern score, serum cholesterol, blood pressure, history of infarction, history of angina pectoris, history of cardiac failure |
| Bazzano LA et al, 2008, USA     | Nurses' Health Study (NHS)                               | 1984-2002, 18 years follow-up              | 71 346 women, age 38-63 years, 4529 cases     | Validated semi-quantitative FFQ, 116 items      | Self-reported/supplemental questionnaire/the National Diabetes Data group criteria (before 1997) or American Diabetes | Vegetables<br><br>Fruit and vegetables (fruit juice excluded) | 1.61 serv/d<br>2.35<br>3.09<br>4.25<br>5.40<br>3 serv/d increase<br>2.35 serv/d<br>3.41<br>4.47 | 1.00<br>1.00 (0.91, 1.10)<br>1.02 (0.93, 1.12)<br>1.08 (0.98, 1.19)<br>1.05 (0.94, 1.16)<br>1.04 (0.97, 1.13)<br>1.00<br>1.01 (0.92, 1.11)<br>1.00 (0.91, 1.10) | Age, BMI, physical activity, family history of diabetes, postmenopausal hormone use, alcohol, smoking, total energy intake, whole grains, nuts, processed meats,                                                                                                                   |

|                               |                                      |                                              |                                           |                                        |                                                                                                                                                      |                                              |                                                                                       |                                                                                                                                                         |                                                                                                                                                                                                                       |
|-------------------------------|--------------------------------------|----------------------------------------------|-------------------------------------------|----------------------------------------|------------------------------------------------------------------------------------------------------------------------------------------------------|----------------------------------------------|---------------------------------------------------------------------------------------|---------------------------------------------------------------------------------------------------------------------------------------------------------|-----------------------------------------------------------------------------------------------------------------------------------------------------------------------------------------------------------------------|
|                               |                                      |                                              |                                           |                                        | criteria (after 1998)                                                                                                                                | Green leafy vegetables                       | 6.07<br>7.66<br>3 serv/d increase<br>0.25 serv/d<br>0.49<br>0.72<br>1.10<br>1.48      | 0.99 (0.89, 1.09)<br>1.01 (0.90, 1.12)<br>0.99 (0.94, 1.05)<br>1.00<br>1.00 (0.91, 1.10)<br>1.02 (0.93, 1.11)<br>0.93 (0.85, 1.03)<br>0.90 (0.82, 1.00) | coffee, potatoes, and sugar-sweetened soft drinks                                                                                                                                                                     |
|                               |                                      |                                              |                                           |                                        |                                                                                                                                                      | Apple, orange, grapefruit/other fruit juices | 1 serv/d increase<br>0.04 serv/d<br>0.29<br>0.54<br>0.94<br>1.33<br>1 serv/d increase | 0.91 (0.84, 0.98)<br>1.00<br>1.21 (1.10, 1.33)<br>1.29 (1.17, 1.42)<br>1.25 (1.14, 1.38)<br>1.35 (1.22, 1.50)<br>1.18 (1.10, 1.26)                      |                                                                                                                                                                                                                       |
| Palmer JR et al, 2008, USA    | Black Women's Health Study (BWHS)    | 1995-2005, 10 years follow-up                | 43 960 women, age 21-69 years, 2713 cases | Validated FFQ, 68-items                | Self-reported, validated by physician                                                                                                                | Sweetened fruit drink                        | <1 drink/mo<br>1-7<br>2-6 drinks/wk<br>1 drink/d<br>≥2                                | 1.00<br>1.08 (0.96, 1.22)<br>1.08 (0.96, 1.21)<br>1.17 (1.02, 1.33)<br>1.31 (1.13, 1.52)                                                                | Age, family history of diabetes, physical activity, cigarette smoking, years of education, and each of the 2 other types of drinks, intake of red meat, processed meats, cereal fiber, and coffee, and glycemic index |
|                               |                                      |                                              |                                           |                                        |                                                                                                                                                      | Orange or grapefruit juice                   | <1 drink/mo<br>1-7<br>2-6 drinks/wk<br>1 drink/d<br>≥2                                | 1<br>0.93 (0.83, 1.05)<br>0.99 (0.88, 1.11)<br>0.99 (0.87, 1.14)<br>1.11 (0.92, 1.35)                                                                   |                                                                                                                                                                                                                       |
| Villegas R et al, 2008, China | Shanghai Women's Health Study (SWHS) | 2000-2002 and 2002-2004, 4.6 years follow-up | 64 191 women, age 40-70 years, 1608 cases | In-person interview with FFQ, 77 items | Self-reported/ validated by fasting glucose level (ADA criteria) and/or an oral glucose tolerance test (OGTT) and/or use of hypoglycaemic medication | All vegetables                               | 121.5 g/d<br>181.6<br>236.0<br>302.6<br>428.0                                         | 1.00<br>0.74 (0.64, 0.87)<br>0.68 (0.58, 0.80)<br>0.72 (0.61, 0.84)<br>0.72 (0.61, 0.85)                                                                | Age, daily energy intake, meat intake, BMI, WHR, smoking, alcohol consumption, physical activity, income level, education level, occupational status, and hypertension                                                |
|                               |                                      |                                              |                                           |                                        |                                                                                                                                                      | Cruciferous vegetables                       | 5.0 g/d<br>10.9<br>17.0<br>25.8<br>45.2                                               | 1.00<br>0.79 (0.68, 0.91)<br>0.69 (0.60, 0.81)<br>0.60 (0.51, 0.71)<br>0.72 (0.61, 0.83)                                                                |                                                                                                                                                                                                                       |
|                               |                                      |                                              |                                           |                                        |                                                                                                                                                      | Green leafy vegetables                       | 28.0 g/d<br>51.3<br>70.7<br>94.1                                                      | 1.00<br>0.78 (0.68, 0.91)<br>0.61 (0.52, 0.71)<br>0.58 (0.49, 0.68)                                                                                     |                                                                                                                                                                                                                       |

|  |  |  |  |  |                   |          |                   |  |
|--|--|--|--|--|-------------------|----------|-------------------|--|
|  |  |  |  |  |                   | 136.1    | 0.82 (0.71, 0.95) |  |
|  |  |  |  |  | Yellow vegetables | 0.04 g/d | 1.00              |  |
|  |  |  |  |  |                   | 0.62     | 0.69 (0.60, 0.80) |  |
|  |  |  |  |  |                   | 2.0      | 0.63 (0.54, 0.73) |  |
|  |  |  |  |  |                   | 5.6      | 0.51 (0.43, 0.60) |  |
|  |  |  |  |  |                   | 17.3     | 0.55 (0.47, 0.64) |  |
|  |  |  |  |  | Allium vegetables | 2.2 g/d  | 1.00              |  |
|  |  |  |  |  |                   | 4.2      | 0.79 (0.68, 0.92) |  |
|  |  |  |  |  |                   | 6.5      | 0.70 (0.60, 0.81) |  |
|  |  |  |  |  |                   | 9.8      | 0.70 (0.60, 0.82) |  |
|  |  |  |  |  |                   | 17.9     | 0.69 (0.59, 0.81) |  |
|  |  |  |  |  | Tomatoes          | 6.8 g/d  | 1.00              |  |
|  |  |  |  |  |                   | 17.0     | 0.68 (0.59, 0.79) |  |
|  |  |  |  |  |                   | 30.3     | 0.73 (0.63, 0.85) |  |
|  |  |  |  |  |                   | 49.2     | 0.61 (0.52, 0.71) |  |
|  |  |  |  |  |                   | 88.5     | 0.78 (0.67, 0.91) |  |
|  |  |  |  |  | Other vegetables  | 40.7 g/d | 1.00              |  |
|  |  |  |  |  |                   | 66.8     | 0.76 (0.65, 0.88) |  |
|  |  |  |  |  |                   | 90.9     | 0.84 (0.72, 0.98) |  |
|  |  |  |  |  |                   | 121.4    | 0.76 (0.64, 0.89) |  |
|  |  |  |  |  |                   | 181.0    | 0.76 (0.64, 0.89) |  |
|  |  |  |  |  | All fruits        | 87.0 g/d | 1.00              |  |
|  |  |  |  |  |                   | 170.4    | 0.76 (0.65, 0.88) |  |
|  |  |  |  |  |                   | 239.4    | 0.79 (0.67, 0.92) |  |
|  |  |  |  |  |                   | 315.0    | 0.87 (0.74, 1.02) |  |
|  |  |  |  |  |                   | 483      | 1.05 (0.90, 1.23) |  |
|  |  |  |  |  | Citrus fruit      | 2.5 g/d  | 1.00              |  |
|  |  |  |  |  |                   | 10.0     | 0.84 (0.72, 0.98) |  |
|  |  |  |  |  |                   | 16.7     | 0.84 (0.72, 0.98) |  |
|  |  |  |  |  |                   | 25.2     | 0.81 (0.69, 0.95) |  |
|  |  |  |  |  |                   | 44.4     | 1.11 (0.95, 1.29) |  |
|  |  |  |  |  | Watermelon        | 29.6 g/d | 1.00              |  |
|  |  |  |  |  |                   | 71.3     | 0.84 (0.72, 0.98) |  |
|  |  |  |  |  |                   | 109.7    | 0.83 (0.71, 0.97) |  |
|  |  |  |  |  |                   | 149.1    | 0.90 (0.77, 1.05) |  |
|  |  |  |  |  |                   | 221.0    | 1.04 (0.89, 1.21) |  |
|  |  |  |  |  | Other fruit       | 27.6 g/d | 1.00              |  |
|  |  |  |  |  |                   | 67.2     | 0.77 (0.66, 0.90) |  |
|  |  |  |  |  |                   | 102.2    | 0.68 (0.58, 0.80) |  |
|  |  |  |  |  |                   | 142.7    | 0.85 (0.73, 0.99) |  |

|                              |                                             |                               |                                                                |                                                    |                                                                                                                                                                                                                                |                                                            |                                                                        |                                                                             |                                                                                                                                                                               |
|------------------------------|---------------------------------------------|-------------------------------|----------------------------------------------------------------|----------------------------------------------------|--------------------------------------------------------------------------------------------------------------------------------------------------------------------------------------------------------------------------------|------------------------------------------------------------|------------------------------------------------------------------------|-----------------------------------------------------------------------------|-------------------------------------------------------------------------------------------------------------------------------------------------------------------------------|
|                              |                                             |                               |                                                                |                                                    |                                                                                                                                                                                                                                |                                                            | 217.6                                                                  | 0.90 (0.77, 1.05)                                                           |                                                                                                                                                                               |
| de Koning L et al, 2011, USA | Health Professionals Follow-up Study (HPFS) | 1986-2006, 20 years follow-up | 51 529 men, age 40-75 years, 2680 cases                        | Validated semi-quantitative FFQ, 131 items         | Self-reported/supplemental questionnaire/the National Diabetes Data group criteria (before 1997) or American Diabetes criteria (after 1998). Questionnaire-confirmed diagnosis of T2D was reconfirmed by medical record review | Fruit punches, lemonades, other noncarbonated fruit drinks | Per 1 serv/d                                                           | 1.05 (0.89, 1.25)                                                           | Age, smoking, physical activity, alcohol intake, multivitamin use, family history of type 2 diabetes, high triglycerides (in 1986), high blood pressure, and use of diuretics |
| Cooper AJ et al, 2012, UK    | EPIC-InterAct Study                         | 1991-2007, 11 years follow-up | Sub-cohort: 14 800 participants, age 40-79 years, 10 821 cases | Country-specific, validated dietary questionnaires | Self-reported/registers/drug registers/hospital admissions/mortality data                                                                                                                                                      | Total fruit and vegetables                                 | <235.7 g/d<br>≥235.7 - <369.1<br>≥369.1 - <544.8<br>≥544.8             | 1.00<br>0.92 (0.83, 1.03)<br>0.93 (0.84, 1.03)<br>0.90 (0.80, 1.01)         | Country, age, centre, sex, education, BMI, physical activity, smoking, total energy intake and alcohol intake                                                                 |
|                              |                                             |                               |                                                                |                                                    |                                                                                                                                                                                                                                | Total fruit                                                | <103.7 g/d<br>≥103.7 - <193.4<br>≥193.4 - <315.9<br>≥315.9             | 1.00<br>0.92 (0.83, 1.03)<br>0.94 (0.83, 1.05)<br>0.89 (0.76, 1.04)         |                                                                                                                                                                               |
|                              |                                             |                               |                                                                |                                                    |                                                                                                                                                                                                                                | Citrus fruit                                               | <10.1 g/d<br>≥10.1 - <35.9<br>≥35.9 - <79.4<br>≥79.4                   | 1.00<br>0.96 (0.86, 1.07)<br>1.00 (0.90, 1.10)<br>1.01 (0.86, 1.19)         | Total fruit: additionally adjusted for total vegetable intake                                                                                                                 |
|                              |                                             |                               |                                                                |                                                    |                                                                                                                                                                                                                                | Non-citrus fruit                                           | <53.0 g/d<br>≥53.0 - <120.9<br>≥120.9 - <213.5<br>≥213.5               | 1.00<br>1.02 (0.92, 1.13)<br>0.97 (0.87, 1.08)<br>0.94 (0.79, 1.13)         | Citrus-and non-citrus fruit: adjusted for other fruit sub-types                                                                                                               |
|                              |                                             |                               |                                                                |                                                    |                                                                                                                                                                                                                                | Total vegetable                                            | <100.5 g/d<br>≥100.5 - <154.8<br>≥154.8 - <237.6<br>≥237.6<br><3.2 g/d | 1.00<br>0.92 (0.84, 1.01)<br>0.93 (0.83, 1.05)<br>0.94 (0.84, 1.05)<br>1.00 | Non-citrus fruit: Umea (Sweden) excluded (no info)                                                                                                                            |

|                             |                                                           |                                            |                                                                                  |                         |                                             |                           |                                                           |                                                                     |                                                                                                                                                                                                                                                                                                                                                                                             |                                                                                                                                   |
|-----------------------------|-----------------------------------------------------------|--------------------------------------------|----------------------------------------------------------------------------------|-------------------------|---------------------------------------------|---------------------------|-----------------------------------------------------------|---------------------------------------------------------------------|---------------------------------------------------------------------------------------------------------------------------------------------------------------------------------------------------------------------------------------------------------------------------------------------------------------------------------------------------------------------------------------------|-----------------------------------------------------------------------------------------------------------------------------------|
|                             |                                                           |                                            |                                                                                  |                         |                                             | Green leafy vegetables    | ≥3.2 - <14.1<br>≥14.1 - <37.7<br>≥37.7                    | 0.74 (0.65, 0.84)<br>0.75 (0.65, 0.86)<br>0.84 (0.65, 1.07)         | Total vegetables: additionally adjusted for total fruit intake<br><br>Green leafy vegetables, cabbages, onion and garlic, stalk vegetables and sprouts, other vegetables: Umea (Sweden) excluded (no info)<br><br>Green leafy vegetable: Denmark excluded from analysis as there was not enough information to calculate HRs and 95% CIs<br><br>Onion and garlic: France excluded (no info) |                                                                                                                                   |
|                             |                                                           |                                            |                                                                                  |                         |                                             | Fruiting vegetables       | <28.6 g/d<br>≥28.6 - <50.5<br>≥50.5 - <87.1<br>≥87.1      | 1.00<br>0.94 (0.86, 1.04)<br>0.96 (0.86, 1.06)<br>0.97 (0.85, 1.12) |                                                                                                                                                                                                                                                                                                                                                                                             |                                                                                                                                   |
|                             |                                                           |                                            |                                                                                  |                         |                                             | Root vegetables           | <3.9 g/d<br>≥3.9 - <11.1<br>≥11.1 - <27.3<br>≥27.3        | 1.00<br>0.98 (0.88, 1.08)<br>0.85 (0.76, 0.95)<br>0.87 (0.77, 0.99) |                                                                                                                                                                                                                                                                                                                                                                                             |                                                                                                                                   |
|                             |                                                           |                                            |                                                                                  |                         |                                             | Cabbages                  | <1.5 g/d<br>≥1.5 - <8.5<br>≥8.5 - <21.4<br>≥21.4          | 1.00<br>0.94 (0.74, 1.19)<br>0.93 (0.80, 1.07)<br>0.90 (0.75, 1.09) |                                                                                                                                                                                                                                                                                                                                                                                             |                                                                                                                                   |
|                             |                                                           |                                            |                                                                                  |                         |                                             | Onion & garlic            | <2.6 g/d<br>≥2.6 - <7.0<br>≥7.0 - <17.7<br>≥17.7          | 1.00<br>0.94 (0.75, 1.18)<br>0.88 (0.71, 1.10)<br>0.92 (0.63, 1.33) |                                                                                                                                                                                                                                                                                                                                                                                             |                                                                                                                                   |
|                             |                                                           |                                            |                                                                                  |                         |                                             | Stalk vegetables, sprouts | <0.2 g/d<br>≥0.2 - <3.8<br>≥3.8 - <9.8<br>≥9.8            | 1.00<br>0.91 (0.70, 1.18)<br>0.78 (0.68, 0.91)<br>0.82 (0.63, 1.07) |                                                                                                                                                                                                                                                                                                                                                                                             |                                                                                                                                   |
|                             |                                                           |                                            |                                                                                  |                         |                                             | Other vegetables          | <3.4 g/d<br>≥3.4 - <10.2<br>≥10.2 - <23.0<br>≥23.0        | 1.00<br>1.01 (0.87, 1.19)<br>0.90 (0.78, 1.04)<br>0.96 (0.76, 1.22) |                                                                                                                                                                                                                                                                                                                                                                                             |                                                                                                                                   |
| Elwood P et al, 2013, UK    | Caerphilly Cohort Study (CaPS)                            | 1979-2009, 30 years follow-up              | 2235 men, age 45-59 years, 214 cases                                             | FFQ                     | Self-reported, validated by medical records | Fruit and vegetables      | 3 + vs. <3 serv/d                                         | 0.91 (0.62, 1.33)                                                   |                                                                                                                                                                                                                                                                                                                                                                                             | Age and social class                                                                                                              |
| Eshak ES et al, 2013, Japan | Japan Public Health Center-based Prospective Study (JPHC) | 1990-1995 to 1990-2000, 10 years follow-up | 27 585 participants, (12 137 men, 15 448 women), age 40-59 years, 824 cases (484 | Validated FFQ, 44 items | Self-reported, validated by medical records | 100% fruit juice          | Rarely<br>≤2 times/wk<br>3-4 times/wk<br>Almost every day | 1.00<br>0.81 (0.65, 1.01)<br>0.93 (0.65, 1.35)<br>1.17 (0.69, 2.00) |                                                                                                                                                                                                                                                                                                                                                                                             | Age, BMI, family history of diabetes, education, occupation, smoking status, alcohol, history of hypertension, physical activity, |
|                             |                                                           |                                            |                                                                                  |                         |                                             | 100% fruit juice          | Rarely<br>≤2 times/wk<br>3-4 times/wk<br>Almost every day | 1.00<br>0.94 (0.73, 1.21)<br>0.90 (0.58, 1.40)<br>1.37 (0.79, 2.37) |                                                                                                                                                                                                                                                                                                                                                                                             |                                                                                                                                   |



|                                  |                                                                                                                                                                    |                                 |                                                |                                                 |                                                                                                                                                             |                                        |                                                                       |                                                                                          |                                                                                                                                                                                                                                                                                                                                                                |
|----------------------------------|--------------------------------------------------------------------------------------------------------------------------------------------------------------------|---------------------------------|------------------------------------------------|-------------------------------------------------|-------------------------------------------------------------------------------------------------------------------------------------------------------------|----------------------------------------|-----------------------------------------------------------------------|------------------------------------------------------------------------------------------|----------------------------------------------------------------------------------------------------------------------------------------------------------------------------------------------------------------------------------------------------------------------------------------------------------------------------------------------------------------|
|                                  |                                                                                                                                                                    |                                 | men, 340 women)                                |                                                 |                                                                                                                                                             | Vegetable juice                        | Rarely<br>≤2 times/wk<br>3-4 times/wk<br>Almost every day             | 1.00<br>0.84 (0.65, 1.09)<br>0.81 (0.49, 1.39)<br>1.27 (0.65, 2.51)                      | coffee, green tea, energy-adjusted intakes of dietary magnesium, calcium, vitamin D, rice and total dietary fiber, and total energy intake                                                                                                                                                                                                                     |
|                                  |                                                                                                                                                                    |                                 |                                                |                                                 |                                                                                                                                                             | Vegetable juice                        | Rarely<br>≤2 times/wk<br>3-4 times/wk<br>Almost every day             | 1.00<br>0.97 (0.69, 1.35)<br>0.92 (0.47, 1.79)<br>0.71 (0.28, 1.82)                      |                                                                                                                                                                                                                                                                                                                                                                |
| Fagherazzi G et al, 2013, France | Etude Epidémiologique auprès des femmes de la Mutuelle Générale de l'Education Nationale–European Prospective Investigation into Cancer and Nutrition cohort (E3N) | 1993-2007, 14 years follow-up   | 66 118 women, age 40-65 years, 1369 cases      | Validated diet-history questionnaire, 208 items | Self-reported/ a diabetes diet plan/ the use of diabetic drugs/ a hospitalization for diabetes, validated by drug registries or supplementary questionnaire | 100% fruit juice                       | Non-consumers<br><180<br>180–447 mL/wk<br>448–967 mL/wk<br>>967 mL/wk | 1.00<br>0.90 (0.76, 1.07)<br>0.95 (0.81, 1.12)<br>1.18 (1.01, 1.38)<br>0.93 (0.78, 1.10) | Age, years of education, smoking, physical activity, hypertension, hypercholesterolemia, use of hormone replacement therapy, family history of diabetes, self-reported use of antidiabetic drugs, alcohol, omega-3 fatty acid intake, carbohydrate, coffee, fruit and vegetables, and processed-meat consumption, dietary pattern, total energy intake and BMI |
| Jacques PF et al, 2013, USA      | Framingham Heart Study Offspring (FHSO)                                                                                                                            | 1991-2008, 11.9 years follow-up | 2 915 participants, age 10-70 years, 308 cases | Semi-quantitative FFQ, 145 items                | Fasting glucose concentrations and/or a medical and medication use history                                                                                  | Apples and pears                       | <138 g/wk<br>138-620<br>621-896<br>≥897                               | 1.00<br>0.99 (0.67, 1.46)<br>0.63 (0.31, 1.26)<br>0.73 (0.35, 1.56)                      | Sex, time-dependent variables age, cardiovascular disease, current smoker, BMI, cumulative mean energy intake                                                                                                                                                                                                                                                  |
|                                  |                                                                                                                                                                    |                                 |                                                |                                                 |                                                                                                                                                             | Banana                                 | <114 g/wk<br>114-512<br>513-740<br>≥741                               | 1.00<br>1.16 (0.78, 1.73)<br>1.06 (0.59, 1.89)<br>1.36 (0.76, 2.43)                      |                                                                                                                                                                                                                                                                                                                                                                |
| Kurotani K et al, 2013, Japan    | Japan Public Health Center-based                                                                                                                                   | 1995-1998 to 2000-2003, 5       | 48 437 men and women (21 269                   | Validated self-administered FFQ, 147 items      | Self-reported, validated by                                                                                                                                 | Total vegetable and fruit intake (men) | 146 g/d<br>273.1<br>414.1                                             | 1.00<br>0.85 (0.66, 1.10)<br>1.08 (0.83, 1.40)                                           | Age, public health centre area, BMI, smoking, alcohol                                                                                                                                                                                                                                                                                                          |

|                                           |                   |                                                                     |                 |                                          |                   |                                                                                                                                                              |                   |
|-------------------------------------------|-------------------|---------------------------------------------------------------------|-----------------|------------------------------------------|-------------------|--------------------------------------------------------------------------------------------------------------------------------------------------------------|-------------------|
| Prospective Study (JPHC)                  | years follow-up   | men, 27 168 women), age 45-75 years, 896 cases (530 men, 366 women) | medical records | 686.8                                    | 0.93 (0.67, 1.29) | consumption, leisure-time activity, history of hypertension, coffee consumption, family history of diabetes, magnesium intake, calcium intake, energy intake |                   |
|                                           |                   |                                                                     |                 | Total vegetable and fruit intake (women) | 209.7 g/d         |                                                                                                                                                              | 1.00              |
|                                           |                   |                                                                     |                 | 532.9                                    | 0.94 (0.69, 1.28) |                                                                                                                                                              |                   |
|                                           |                   |                                                                     |                 | 858.7                                    | 0.79 (0.56, 1.11) |                                                                                                                                                              |                   |
|                                           |                   |                                                                     |                 | 75.2 g/d                                 | 1.04 (0.69, 1.55) |                                                                                                                                                              |                   |
|                                           |                   |                                                                     |                 | Total vegetable intake (men)             | 1.00              |                                                                                                                                                              |                   |
|                                           |                   |                                                                     |                 | 141.7                                    | 0.93 (0.73, 1.19) |                                                                                                                                                              |                   |
|                                           |                   |                                                                     |                 | 213.1                                    | 0.92 (0.70, 1.20) |                                                                                                                                                              |                   |
|                                           |                   |                                                                     |                 | 355.4                                    | 0.81 (0.59, 1.13) |                                                                                                                                                              |                   |
|                                           |                   |                                                                     |                 | Total vegetable intake (women)           | 1.00              |                                                                                                                                                              |                   |
|                                           |                   |                                                                     |                 | 99.5 g/d                                 | 1.04 (0.77, 1.41) |                                                                                                                                                              |                   |
|                                           |                   |                                                                     |                 | 172.7                                    | 0.76 (0.54, 1.08) |                                                                                                                                                              |                   |
|                                           |                   |                                                                     |                 | 252.5                                    | 0.99 (0.66, 1.47) |                                                                                                                                                              |                   |
|                                           |                   |                                                                     |                 | 406.9                                    | 1.00              |                                                                                                                                                              |                   |
|                                           |                   |                                                                     |                 | Total fruit intake (men)                 | 0.94 (0.73, 1.19) |                                                                                                                                                              |                   |
|                                           |                   |                                                                     |                 | 113.1                                    | 0.91 (0.70, 1.18) |                                                                                                                                                              |                   |
|                                           |                   |                                                                     |                 | 191.6                                    | 0.94 (0.71, 1.26) |                                                                                                                                                              |                   |
|                                           |                   |                                                                     |                 | 362.4                                    | 1.00              |                                                                                                                                                              |                   |
|                                           |                   |                                                                     |                 | Total fruit intake (women)               | 0.73 (0.53, 1.00) |                                                                                                                                                              |                   |
|                                           |                   |                                                                     |                 | 74.4 g/d                                 | 0.96 (0.70, 1.32) |                                                                                                                                                              |                   |
|                                           |                   |                                                                     |                 | 166.3                                    | 1.04 (0.73, 1.48) |                                                                                                                                                              |                   |
|                                           |                   |                                                                     |                 | 272.2                                    | 1.00              |                                                                                                                                                              |                   |
|                                           |                   |                                                                     |                 | 487.1                                    | 0.82 (0.64, 1.06) |                                                                                                                                                              |                   |
|                                           |                   |                                                                     |                 | Total green and yellow vegetables (men)  | 58.8              |                                                                                                                                                              | 1.05 (0.82, 1.36) |
| 94.6                                      | 0.90 (0.66, 1.22) |                                                                     |                 |                                          |                   |                                                                                                                                                              |                   |
| 172.4                                     | 1.00              |                                                                     |                 |                                          |                   |                                                                                                                                                              |                   |
| Total green and yellow vegetables (women) | 35.4 g/d          | 1.06 (0.79, 1.42)                                                   |                 |                                          |                   |                                                                                                                                                              |                   |
| 70.9                                      | 0.84 (0.61, 1.17) |                                                                     |                 |                                          |                   |                                                                                                                                                              |                   |
| 113.2                                     | 0.89 (0.61, 1.29) |                                                                     |                 |                                          |                   |                                                                                                                                                              |                   |
| 197.5                                     | 1.00              |                                                                     |                 |                                          |                   |                                                                                                                                                              |                   |
| Green leafy vegetables (men)              | 4.5 g/d           | 0.92 (0.72, 1.17)                                                   |                 |                                          |                   |                                                                                                                                                              |                   |
| 11.8                                      | 0.88 (0.68, 1.14) |                                                                     |                 |                                          |                   |                                                                                                                                                              |                   |
| 22.7                                      | 0.83 (0.62, 1.12) |                                                                     |                 |                                          |                   |                                                                                                                                                              |                   |
| 47.2                                      | 1.00              |                                                                     |                 |                                          |                   |                                                                                                                                                              |                   |
| Green leafy vegetables (women)            | 7.4 g/d           | 0.81 (0.60, 1.10)                                                   |                 |                                          |                   |                                                                                                                                                              |                   |
| 16.7                                      | 0.88 (0.65, 1.20) |                                                                     |                 |                                          |                   |                                                                                                                                                              |                   |
| 29.5                                      | 0.81 (0.57, 1.16) |                                                                     |                 |                                          |                   |                                                                                                                                                              |                   |
| 57.5                                      | 1.00              |                                                                     |                 |                                          |                   |                                                                                                                                                              |                   |
| Cruciferous vegetables (men)              | 17.6 g/d          | 1.02 (0.80, 1.30)                                                   |                 |                                          |                   |                                                                                                                                                              |                   |
| 37.3                                      | 0.94 (0.73, 1.22) |                                                                     |                 |                                          |                   |                                                                                                                                                              |                   |
| 60.8                                      |                   |                                                                     |                 |                                          |                   |                                                                                                                                                              |                   |

|                           |                            |                               |                                           |                                            |                                                                                                                                                                                                                                 |                                |                                                                |                                                                                                               |                                                                                                                                                                                                                                                                                                                              |
|---------------------------|----------------------------|-------------------------------|-------------------------------------------|--------------------------------------------|---------------------------------------------------------------------------------------------------------------------------------------------------------------------------------------------------------------------------------|--------------------------------|----------------------------------------------------------------|---------------------------------------------------------------------------------------------------------------|------------------------------------------------------------------------------------------------------------------------------------------------------------------------------------------------------------------------------------------------------------------------------------------------------------------------------|
|                           |                            |                               |                                           |                                            |                                                                                                                                                                                                                                 | Cruciferous vegetables (women) | 103.9<br>24.0 g/d<br>47.6<br>72.5<br>119.8                     | 0.78 (0.58, 1.06)<br>1.00<br>1.09 (0.80, 1.48)<br>1.13 (0.82, 1.55)<br>1.10 (0.77, 1.57)                      |                                                                                                                                                                                                                                                                                                                              |
|                           |                            |                               |                                           |                                            |                                                                                                                                                                                                                                 | Citrus fruits (men)            | 7.2 g/d<br>46.5<br>79.3                                        | 1.00<br>1.00 (0.79, 1.28)<br>0.85 (0.65, 1.10)                                                                |                                                                                                                                                                                                                                                                                                                              |
|                           |                            |                               |                                           |                                            |                                                                                                                                                                                                                                 | Citrus fruits (women)          | 165.4<br>19.1 g/d<br>66.0<br>114.8<br>248.9                    | 1.04 (0.79, 1.36)<br>1.00<br>0.91 (0.67, 1.23)<br>0.92 (0.67, 1.27)<br>1.14 (0.82, 1.58)                      |                                                                                                                                                                                                                                                                                                                              |
| Muraki I et al, 2013, USA | Nurses' Health Study (NHS) | 1984-2008, 21 years follow-up | 66 105 women, age 30-55 years, 6358 cases | Validated semi-quantitative FFQ, 116 items | Self-reported/supplemental questionnaire/ the National Diabetes Data group criteria (before 1997) or American Diabetes criteria (after 1998). Questionnaire-confirmed diagnosis of T2D was reconfirmed by medical record review | Total whole fruit consumption  | <4 serv/wk<br>5-6<br>1 serv/d<br>2<br>≥3<br>Every 3 serv/wk    | 1.00<br>0.92 (0.85, 0.99)<br>0.96 (0.80, 0.93)<br>0.86 (0.79, 0.93)<br>0.90 (0.81, 0.99)<br>0.98, 0.96, 1.00  | Age, ethnicity, BMI, smoking, multivitamin use, physical activity, family history of diabetes, menopausal status and post-menopausal hormone use, oral contraceptive use, total energy intake, fruit juice consumption and modified alternate healthy eating index score. Individual fruit consumption was mutually adjusted |
|                           |                            |                               |                                           |                                            |                                                                                                                                                                                                                                 | Grapes and raisins             | <1 serv/mo<br>1-3<br>1 serv/wk<br>2-4<br>≥5<br>Every 3 serv/wk | 1.00<br>0.91 (0.86, 0.97)<br>0.88 (0.80, 0.95)<br>0.80 (0.72, 0.88)<br>0.77 (0.64, 0.92)<br>0.84 (0.78, 0.91) |                                                                                                                                                                                                                                                                                                                              |
|                           |                            |                               |                                           |                                            |                                                                                                                                                                                                                                 | Peaches, plums and apricots    | <1 serv/mo<br>1-3<br>1 serv/wk<br>2-4<br>≥5<br>Every 3 serv/wk | 1.00<br>0.99 (0.93, 1.07)<br>1.00 (0.92, 1.08)<br>1.04 (0.94, 1.14)<br>0.92 (0.78, 1.09)<br>1.00 (0.93, 1.07) |                                                                                                                                                                                                                                                                                                                              |
|                           |                            |                               |                                           |                                            |                                                                                                                                                                                                                                 | Prunes                         | <1 serv/mo<br>1-3<br>1 serv/wk<br>2-≥5<br>Every 3 serv/wk      | 1.00<br>0.99 (0.92, 1.07)<br>0.86 (0.73, 1.02)<br>0.89 (0.75, 1.06)<br>0.87 (0.74, 1.03)                      |                                                                                                                                                                                                                                                                                                                              |
|                           |                            |                               |                                           |                                            |                                                                                                                                                                                                                                 | Bananas                        | <1 serv/mo<br>1-3<br>1 serv/wk<br>2-4                          | 1.00<br>1.08 (0.98, 1.19)<br>1.05 (0.95, 1.17)<br>1.04 (0.94, 1.15)                                           |                                                                                                                                                                                                                                                                                                                              |

|  |  |  |  |  |                  |                 |                   |  |
|--|--|--|--|--|------------------|-----------------|-------------------|--|
|  |  |  |  |  |                  | ≥5              | 1.08 (0.96, 1.21) |  |
|  |  |  |  |  |                  | Every 3 serv/wk | 1.01 (0.96, 1.06) |  |
|  |  |  |  |  | Cantaloupe       | <1 serv/mo      | 1.00              |  |
|  |  |  |  |  |                  | 1-3             | 1.00 (0.93, 1.08) |  |
|  |  |  |  |  |                  | 1 serv/wk       | 1.06 (0.98, 1.15) |  |
|  |  |  |  |  |                  | 2-≥5            | 1.07 (0.96, 1.19) |  |
|  |  |  |  |  |                  | Every 3 serv/wk | 1.08 (0.98, 1.18) |  |
|  |  |  |  |  | Apples and pears | <1 serv/mo      | 1.00              |  |
|  |  |  |  |  |                  | 1-3             | 0.94 (0.84, 1.04) |  |
|  |  |  |  |  |                  | 1 serv/wk       | 0.94 (0.84, 1.05) |  |
|  |  |  |  |  |                  | 2-4             | 0.85 (0.77, 0.95) |  |
|  |  |  |  |  |                  | ≥5              | 0.82 (0.73, 0.92) |  |
|  |  |  |  |  | Oranges          | Every 3 serv/wk | 0.91 (0.87, 0.95) |  |
|  |  |  |  |  |                  | <1 serv/mo      | 1.00              |  |
|  |  |  |  |  |                  | 1-3             | 0.96 (0.89, 1.04) |  |
|  |  |  |  |  |                  | 1 serv/wk       | 1.03 (0.94, 1.13) |  |
|  |  |  |  |  |                  | 2-4             | 0.96 (0.87, 1.05) |  |
|  |  |  |  |  |                  | ≥5              | 1.03 (0.92, 1.15) |  |
|  |  |  |  |  |                  | Every 3 serv/wk | 1.00 (0.95, 1.06) |  |
|  |  |  |  |  | Grapefruit       | <1 serv/mo      | 1.00              |  |
|  |  |  |  |  |                  | 1-3             | 0.91 (0.85, 0.97) |  |
|  |  |  |  |  |                  | 1 serv/wk       | 0.95 (0.88, 1.03) |  |
|  |  |  |  |  |                  | 2-4             | 0.88 (0.80, 0.96) |  |
|  |  |  |  |  |                  | ≥5              | 0.86 (0.75, 0.98) |  |
|  |  |  |  |  |                  | Every 3 serv/wk | 0.92 (0.87, 0.98) |  |
|  |  |  |  |  | Total berries    | <1 serv/mo      | 1.00              |  |
|  |  |  |  |  |                  | 1-3             | 0.93 (0.86, 1.01) |  |
|  |  |  |  |  |                  | 1 serv/wk       | 0.95 (0.87, 1.03) |  |
|  |  |  |  |  |                  | 2-4             | 0.91 (0.82, 0.99) |  |
|  |  |  |  |  |                  | ≥5              | 0.96 (0.83, 1.11) |  |
|  |  |  |  |  |                  | Every 3 serv/wk | 0.97 (0.91, 1.03) |  |
|  |  |  |  |  | Strawberries     | <1 serv/mo      | 1.00              |  |
|  |  |  |  |  |                  | 1-3             | 0.94 (0.87, 1.01) |  |
|  |  |  |  |  |                  | 1 serv/wk       | 0.98 (0.90, 1.07) |  |
|  |  |  |  |  |                  | 2-4             | 0.87 (0.77, 0.98) |  |
|  |  |  |  |  |                  | ≥5              | 0.99 (0.79, 1.25) |  |
|  |  |  |  |  |                  | Every 3 serv/wk | 0.94 (0.85, 1.03) |  |
|  |  |  |  |  | Blueberries      | <1 serv/mo      | 1.00              |  |
|  |  |  |  |  |                  | 1-3             | 0.90 (0.85, 0.96) |  |
|  |  |  |  |  |                  | 1 serv/wk       | 0.89 (0.82, 0.98) |  |

|                           |                                  |                               |                                           |                                            |                                                                                                                                             |                                                                                                                                           |                                                                                                                                                                                                                                                                                                                                                                       |                                                                                                                                                                                                                                                                                                                                                                                                                                                                                                                                                                                                                |                                                                                                                                                                                                                                                                                                                              |
|---------------------------|----------------------------------|-------------------------------|-------------------------------------------|--------------------------------------------|---------------------------------------------------------------------------------------------------------------------------------------------|-------------------------------------------------------------------------------------------------------------------------------------------|-----------------------------------------------------------------------------------------------------------------------------------------------------------------------------------------------------------------------------------------------------------------------------------------------------------------------------------------------------------------------|----------------------------------------------------------------------------------------------------------------------------------------------------------------------------------------------------------------------------------------------------------------------------------------------------------------------------------------------------------------------------------------------------------------------------------------------------------------------------------------------------------------------------------------------------------------------------------------------------------------|------------------------------------------------------------------------------------------------------------------------------------------------------------------------------------------------------------------------------------------------------------------------------------------------------------------------------|
|                           |                                  |                               |                                           |                                            |                                                                                                                                             | Fruit juice                                                                                                                               | 2-≥5<br>Every 3 serv/wk<br><1 serv/wk<br>1<br>2-4<br>5-6<br>≥1 serv/d<br>Per 3 serv/wk                                                                                                                                                                                                                                                                                | 0.82 (0.69, 0.98)<br>0.77 (0.66, 0.91)<br>1.00<br>1.09 (0.98, 1.21)<br>1.13 (1.03, 1.23)<br>1.13 (1.03, 1.24)<br>1.21 (1.12, 1.31)<br>1.07 (1.04, 1.11)                                                                                                                                                                                                                                                                                                                                                                                                                                                        |                                                                                                                                                                                                                                                                                                                              |
| Muraki I et al, 2013, USA | Nurses' Health Study II (NHS II) | 1991-2009, 20 years follow-up | 85 104 women, age 25-42 years, 3153 cases | Validated semi-quantitative FFQ, 131 items | Self-reported/supplemental questionnaire/the National Diabetes Data group criteria (before 1997) or American Diabetes criteria (after 1998) | Total whole fruit consumption<br><br>Grapes and raisins<br><br>Peaches, plums and apricots<br><br>Prunes<br><br>Bananas<br><br>Cantaloupe | <4 serv/wk<br>5-6<br>1 serv/d<br>2<br>≥3<br>Every 3 serv/wk<br><1 serv/mo<br>1-3<br>1 serv/wk<br>2-4<br>≥5<br>Every 3 serv/wk<br><1 serv/mo<br>1-3<br>1 serv/wk<br>2-4<br>≥5<br>Every 3 serv/wk<br><1 serv/mo<br>1-3<br>1 serv/wk<br>2-4<br>≥5<br>Every 3 serv/wk<br><1 serv/mo<br>1-3<br>1 serv/wk<br>2-4<br>≥5<br>Every 3 serv/wk<br><1 serv/mo<br>1-3<br>1 serv/wk | 1.00<br>0.86 (0.77, 0.95)<br>0.84 (0.76, 0.94)<br>0.88 (0.78, 0.98)<br>0.92 (0.78, 1.08)<br>0.99 (0.96, 1.00)<br>1.00<br>0.81 (0.74, 0.88)<br>0.85 (0.75, 0.96)<br>0.83 (0.72, 0.97)<br>0.88 (0.66, 1.16)<br>0.91 (0.81, 1.02)<br>1.00<br>1.07 (0.97, 1.18)<br>1.03 (0.91, 1.16)<br>0.99 (0.86, 1.14)<br>1.01 (0.78, 1.31)<br>0.97 (0.87, 1.08)<br>1.00<br>0.85 (0.75, 0.96)<br>1.00 (0.77, 1.31)<br>1.16 (0.88, 1.53)<br>1.03 (0.79, 1.34)<br>1.00<br>0.95 (0.84, 1.07)<br>0.95 (0.83, 1.08)<br>0.82 (0.72, 0.94)<br>0.80 (0.67, 0.94)<br>0.87 (0.81, 0.94)<br>1.00<br>0.99 (0.90, 1.09)<br>1.05 (0.94, 1.17) | Age, ethnicity, BMI, smoking, multivitamin use, physical activity, family history of diabetes, menopausal status and post-menopausal hormone use, oral contraceptive use, total energy intake, fruit juice consumption and modified alternate healthy eating index score. Individual fruit consumption was mutually adjusted |



|  |  |  |  |  |                  |                 |                   |  |
|--|--|--|--|--|------------------|-----------------|-------------------|--|
|  |  |  |  |  |                  | 2-≥5            | 1.11 (0.94, 1.30) |  |
|  |  |  |  |  |                  | Every 3 serv/wk | 1.12 (0.96, 1.32) |  |
|  |  |  |  |  | Apples and pears | <1 serv/mo      | 1.00              |  |
|  |  |  |  |  |                  | 1-3             | 0.83 (0.72, 0.95) |  |
|  |  |  |  |  |                  | 1 serv/wk       | 0.83 (0.72, 0.96) |  |
|  |  |  |  |  |                  | 2-4             | 0.79 (0.68, 0.91) |  |
|  |  |  |  |  |                  | ≥5              | 0.76 (0.64, 0.90) |  |
|  |  |  |  |  |                  | Every 3 serv/wk | 0.92 (0.86, 0.99) |  |
|  |  |  |  |  | Oranges          | <1 serv/mo      | 1.00              |  |
|  |  |  |  |  |                  | 1-3             | 0.94 (0.85, 1.04) |  |
|  |  |  |  |  |                  | 1 serv/wk       | 0.93 (0.82, 1.05) |  |
|  |  |  |  |  |                  | 2-4             | 0.93 (0.81, 1.07) |  |
|  |  |  |  |  |                  | ≥5              | 0.97 (0.78, 1.21) |  |
|  |  |  |  |  |                  | Every 3 serv/wk | 0.99 (0.89, 1.09) |  |
|  |  |  |  |  | Grapefruit       | <1 serv/mo      | 1.00              |  |
|  |  |  |  |  |                  | 1-3             | 1.00 (0.91, 1.09) |  |
|  |  |  |  |  |                  | 1 serv/wk       | 1.06 (0.94, 1.20) |  |
|  |  |  |  |  |                  | 2-4             | 0.97 (0.83, 1.14) |  |
|  |  |  |  |  |                  | ≥5              | 0.91 (0.69, 1.21) |  |
|  |  |  |  |  |                  | Every 3 serv/wk | 0.97 (0.86, 1.09) |  |
|  |  |  |  |  | Total berries    | <1 serv/mo      | 1.00              |  |
|  |  |  |  |  |                  | 1-3             | 0.93 (0.84, 1.05) |  |
|  |  |  |  |  |                  | 1 serv/wk       | 0.93 (0.82, 1.05) |  |
|  |  |  |  |  |                  | 2-4             | 0.92 (0.80, 1.05) |  |
|  |  |  |  |  |                  | ≥5              | 1.03 (0.86, 1.24) |  |
|  |  |  |  |  |                  | Every 3 serv/wk | 1.02 (0.94, 1.11) |  |
|  |  |  |  |  | Strawberries     | <1 serv/mo      | 1.00              |  |
|  |  |  |  |  |                  | 1-3             | 0.97 (0.87, 1.08) |  |
|  |  |  |  |  |                  | 1 serv/wk       | 1.01 (0.89, 1.15) |  |
|  |  |  |  |  |                  | 2-4             | 1.09 (0.93, 1.27) |  |
|  |  |  |  |  |                  | ≥5              | 1.08 (0.81, 1.43) |  |
|  |  |  |  |  |                  | Every 3 serv/wk | 1.09 (0.97, 1.22) |  |
|  |  |  |  |  | Blueberries      | <1 serv/mo      | 1.00              |  |
|  |  |  |  |  |                  | 1-3             | 0.83 (0.76, 0.91) |  |
|  |  |  |  |  |                  | 1 serv/wk       | 0.90 (0.79, 1.04) |  |
|  |  |  |  |  |                  | 2-≥5            | 0.69 (0.55, 0.87) |  |
|  |  |  |  |  |                  | Every 3 serv/wk | 0.67 (0.54, 0.83) |  |
|  |  |  |  |  | Fruit juice      | <1 serv/wk      | 1.00              |  |
|  |  |  |  |  |                  | 1               | 0.92 (0.81, 1.05) |  |
|  |  |  |  |  |                  | 2-4             | 0.97 (0.87, 1.00) |  |

|                           |                                             |                               |                                         |                                            |                                                                                                                                                                                                                                |                               |                                   |                                                             |                                                                                                                                                                                                                                                   |                   |
|---------------------------|---------------------------------------------|-------------------------------|-----------------------------------------|--------------------------------------------|--------------------------------------------------------------------------------------------------------------------------------------------------------------------------------------------------------------------------------|-------------------------------|-----------------------------------|-------------------------------------------------------------|---------------------------------------------------------------------------------------------------------------------------------------------------------------------------------------------------------------------------------------------------|-------------------|
|                           |                                             |                               |                                         |                                            |                                                                                                                                                                                                                                |                               | 5-6<br>≥1 serv/d<br>Per 3 serv/wk | 0.97 (0.86, 1.09)<br>1.14 (1.02, 1.27)<br>1.07 (1.02, 1.11) |                                                                                                                                                                                                                                                   |                   |
| Muraki I et al, 2013, USA | Health Professionals Follow-up Study (HPFS) | 1986-2008, 22 years follow-up | 36 173 men, age 40-75 years, 2687 cases | Validated semi-quantitative FFQ, 131 items | Self-reported/supplemental questionnaire/the National Diabetes Data group criteria (before 1997) or American Diabetes criteria (after 1998). Questionnaire-confirmed diagnosis of T2D was reconfirmed by medical record review | Total whole fruit consumption | <4 serv/wk                        | 1.00                                                        | Age, ethnicity, BMI, smoking, multivitamin use, physical activity, family history of diabetes, total energy intake, fruit juice consumption and modified alternate healthy eating index score. Individual fruit consumption was mutually adjusted |                   |
|                           |                                             |                               |                                         |                                            |                                                                                                                                                                                                                                |                               | 5-6                               | 1.00 (0.88, 1.12)                                           |                                                                                                                                                                                                                                                   |                   |
|                           |                                             |                               |                                         |                                            |                                                                                                                                                                                                                                |                               | 1 serv/d                          | 0.92 (0.82, 1.03)                                           |                                                                                                                                                                                                                                                   |                   |
|                           |                                             |                               |                                         |                                            |                                                                                                                                                                                                                                |                               | 2                                 | 0.89 (0.79, 1.01)                                           |                                                                                                                                                                                                                                                   |                   |
|                           |                                             |                               |                                         |                                            |                                                                                                                                                                                                                                |                               | ≥3                                | 0.90 (0.78, 1.04)                                           |                                                                                                                                                                                                                                                   |                   |
|                           |                                             |                               |                                         |                                            |                                                                                                                                                                                                                                |                               | Every 3 serv/wk                   | 0.98 (0.95, 1.00)                                           |                                                                                                                                                                                                                                                   |                   |
|                           |                                             |                               |                                         |                                            |                                                                                                                                                                                                                                |                               | Grapes and raisins                | <1 serv/mo                                                  |                                                                                                                                                                                                                                                   | 1.00              |
|                           |                                             |                               |                                         |                                            |                                                                                                                                                                                                                                |                               |                                   | 1-3                                                         |                                                                                                                                                                                                                                                   | 0.95 (0.87, 1.05) |
|                           |                                             |                               |                                         |                                            |                                                                                                                                                                                                                                |                               |                                   | 1 serv/wk                                                   |                                                                                                                                                                                                                                                   | 0.95 (0.84, 1.08) |
|                           |                                             |                               |                                         |                                            |                                                                                                                                                                                                                                |                               |                                   | 2-4                                                         |                                                                                                                                                                                                                                                   | 0.87 (0.76, 1.01) |
|                           |                                             |                               |                                         |                                            |                                                                                                                                                                                                                                |                               |                                   | ≥5                                                          |                                                                                                                                                                                                                                                   | 0.84 (0.69, 1.04) |
|                           |                                             |                               |                                         |                                            |                                                                                                                                                                                                                                |                               | Peaches, plums and apricots       | Every 3 serv/wk                                             |                                                                                                                                                                                                                                                   | 0.91 (0.82, 0.99) |
|                           |                                             |                               |                                         |                                            |                                                                                                                                                                                                                                |                               |                                   | <1 serv/mo                                                  |                                                                                                                                                                                                                                                   | 1.00              |
|                           |                                             |                               |                                         |                                            |                                                                                                                                                                                                                                |                               |                                   | 1-3                                                         |                                                                                                                                                                                                                                                   | 0.98 (0.88, 1.08) |
|                           |                                             |                               |                                         |                                            |                                                                                                                                                                                                                                |                               |                                   | 1 serv/wk                                                   |                                                                                                                                                                                                                                                   | 1.03 (0.90, 1.18) |
|                           |                                             |                               |                                         |                                            |                                                                                                                                                                                                                                |                               |                                   | 2-4                                                         |                                                                                                                                                                                                                                                   | 0.88 (0.75, 1.04) |
|                           |                                             |                               |                                         |                                            |                                                                                                                                                                                                                                |                               | Prunes                            | ≥5                                                          |                                                                                                                                                                                                                                                   | 0.75 (0.55, 1.04) |
|                           |                                             |                               |                                         |                                            |                                                                                                                                                                                                                                |                               |                                   | Every 3 serv/wk                                             |                                                                                                                                                                                                                                                   | 0.87 (0.77, 0.99) |
|                           |                                             |                               |                                         |                                            |                                                                                                                                                                                                                                |                               |                                   | <1 serv/mo                                                  |                                                                                                                                                                                                                                                   | 1.00              |
|                           |                                             |                               |                                         |                                            |                                                                                                                                                                                                                                |                               |                                   | 1-3                                                         |                                                                                                                                                                                                                                                   | 0.92 (0.80, 1.06) |
|                           |                                             |                               |                                         |                                            |                                                                                                                                                                                                                                |                               |                                   | 1 serv/wk                                                   |                                                                                                                                                                                                                                                   | 0.83 (0.63, 1.10) |
|                           |                                             |                               |                                         |                                            |                                                                                                                                                                                                                                |                               | Bananas                           | 2-≥5                                                        |                                                                                                                                                                                                                                                   | 0.86 (0.66, 1.12) |
|                           |                                             |                               |                                         |                                            |                                                                                                                                                                                                                                |                               |                                   | Every 3 serv/wk                                             |                                                                                                                                                                                                                                                   | 0.82 (0.63, 1.07) |
| <1 serv/mo                | 1.00                                        |                               |                                         |                                            |                                                                                                                                                                                                                                |                               |                                   |                                                             |                                                                                                                                                                                                                                                   |                   |
| 1-3                       | 1.09 (0.95, 1.25)                           |                               |                                         |                                            |                                                                                                                                                                                                                                |                               |                                   |                                                             |                                                                                                                                                                                                                                                   |                   |
| 1 serv/wk                 | 1.01 (0.87, 1.18)                           |                               |                                         |                                            |                                                                                                                                                                                                                                |                               |                                   |                                                             |                                                                                                                                                                                                                                                   |                   |
| Cantaloupe                | 2-4                                         | 0.93 (0.80, 1.07)             |                                         |                                            |                                                                                                                                                                                                                                |                               |                                   |                                                             |                                                                                                                                                                                                                                                   |                   |
|                           | ≥5                                          | 0.86 (0.73, 1.01)             |                                         |                                            |                                                                                                                                                                                                                                |                               |                                   |                                                             |                                                                                                                                                                                                                                                   |                   |
|                           | Every 3 serv/wk                             | 0.89 (0.83, 0.95)             |                                         |                                            |                                                                                                                                                                                                                                |                               |                                   |                                                             |                                                                                                                                                                                                                                                   |                   |
|                           | <1 serv/mo                                  | 1.00                          |                                         |                                            |                                                                                                                                                                                                                                |                               |                                   |                                                             |                                                                                                                                                                                                                                                   |                   |
|                           | 1-3                                         | 1.15 (1.03, 1.27)             |                                         |                                            |                                                                                                                                                                                                                                |                               |                                   |                                                             |                                                                                                                                                                                                                                                   |                   |
| Apples and pears          | 1 serv/wk                                   | 1.17 (1.03, 1.34)             |                                         |                                            |                                                                                                                                                                                                                                |                               |                                   |                                                             |                                                                                                                                                                                                                                                   |                   |
|                           | 2-≥5                                        | 1.19 (1.01, 1.40)             |                                         |                                            |                                                                                                                                                                                                                                |                               |                                   |                                                             |                                                                                                                                                                                                                                                   |                   |
|                           | Every 3 serv/wk                             | 1.14 (0.98, 1.34)             |                                         |                                            |                                                                                                                                                                                                                                |                               |                                   |                                                             |                                                                                                                                                                                                                                                   |                   |
|                           | <1 serv/mo                                  | 1.00                          |                                         |                                            |                                                                                                                                                                                                                                |                               |                                   |                                                             |                                                                                                                                                                                                                                                   |                   |
|                           | 1-3                                         | 0.91 (0.78, 1.06)             |                                         |                                            |                                                                                                                                                                                                                                |                               |                                   |                                                             |                                                                                                                                                                                                                                                   |                   |
|                           |                                             |                               |                                         |                                            |                                                                                                                                                                                                                                |                               | 1 serv/wk                         | 0.98 (0.83, 1.16)                                           |                                                                                                                                                                                                                                                   |                   |

|  |  |  |  |  |               |                 |                   |  |
|--|--|--|--|--|---------------|-----------------|-------------------|--|
|  |  |  |  |  |               | 2-4             | 0.91 (0.77, 1.07) |  |
|  |  |  |  |  |               | ≥ 5             | 0.93 (0.78, 1.11) |  |
|  |  |  |  |  |               | Every 3 serv/wk | 0.98 (0.92, 1.06) |  |
|  |  |  |  |  | Oranges       | <1 serv/mo      | 1.00              |  |
|  |  |  |  |  |               | 1-3             | 0.89 (0.79, 1.01) |  |
|  |  |  |  |  |               | 1 serv/wk       | 0.91 (0.79, 1.04) |  |
|  |  |  |  |  |               | 2-4             | 0.89 (0.78, 1.03) |  |
|  |  |  |  |  |               | ≥5              | 0.89 (0.76, 1.05) |  |
|  |  |  |  |  |               | Every 3 serv/wk | 0.97 (0.90, 1.05) |  |
|  |  |  |  |  | Grapefruit    | <1 serv/mo      | 1.00              |  |
|  |  |  |  |  |               | 1-3             | 1.03 (0.93, 1.14) |  |
|  |  |  |  |  |               | 1 serv/wk       | 1.09 (0.96, 1.24) |  |
|  |  |  |  |  |               | 2-4             | 0.93 (0.81, 1.06) |  |
|  |  |  |  |  |               | ≥5              | 1.08 (0.90, 1.30) |  |
|  |  |  |  |  |               | Every 3 serv/wk | 0.99 (0.91, 1.08) |  |
|  |  |  |  |  | Total berries | <1 serv/mo      | 1.00              |  |
|  |  |  |  |  |               | 1-3             | 0.93 (0.83, 1.03) |  |
|  |  |  |  |  |               | 1 serv/wk       | 0.95 (0.84, 1.07) |  |
|  |  |  |  |  |               | 2-4             | 0.94 (0.81, 1.09) |  |
|  |  |  |  |  |               | ≥5              | 1.22 (0.98, 1.52) |  |
|  |  |  |  |  |               | Per 3 serv/wk   | 1.24 (1.08, 1.42) |  |
|  |  |  |  |  | Strawberries  | <1 serv/mo      | 1.00              |  |
|  |  |  |  |  |               | 1-3             | 0.95 (0.85, 1.05) |  |
|  |  |  |  |  |               | 1 serv/wk       | 0.98 (0.85, 1.13) |  |
|  |  |  |  |  |               | 2-4             | 1.16 (0.95, 1.42) |  |
|  |  |  |  |  |               | ≥5              | 1.51 (1.00, 2.28) |  |
|  |  |  |  |  |               | Every 3 serv/wk | 1.22 (1.03, 1.43) |  |
|  |  |  |  |  | Blueberries   | <1 serv/mo      | 1.00              |  |
|  |  |  |  |  |               | 1-3             | 0.94 (0.85, 1.03) |  |
|  |  |  |  |  |               | 1 serv/wk       | 0.96 (0.80, 1.15) |  |
|  |  |  |  |  |               | 2-≥5            | 0.74 (0.55, 1.00) |  |
|  |  |  |  |  |               | Every 3 serv/wk | 0.75 (0.58, 0.98) |  |
|  |  |  |  |  | Fruit juice   | <1 serv/wk      | 1.00              |  |
|  |  |  |  |  |               | 1               | 1.07 (0.91, 1.26) |  |
|  |  |  |  |  |               | 2-4             | 0.99 (0.86, 1.13) |  |
|  |  |  |  |  |               | 5-6             | 1.05 (0.92, 1.20) |  |
|  |  |  |  |  |               | ≥1 serv/d       | 1.13 (1.01, 1.27) |  |
|  |  |  |  |  |               | Per 3 serv/wk   | 1.06 (1.01, 1.11) |  |

|                              |                                                         |                                              |                                                          |                                                   |                                                                                                                                                                |                                                                                                                 |                                                                                                                                                                                                                                         |                                                                                                                                                                                                                                                                                                                                                                                                                   |                                                                                                                                                                                                                                                                                      |
|------------------------------|---------------------------------------------------------|----------------------------------------------|----------------------------------------------------------|---------------------------------------------------|----------------------------------------------------------------------------------------------------------------------------------------------------------------|-----------------------------------------------------------------------------------------------------------------|-----------------------------------------------------------------------------------------------------------------------------------------------------------------------------------------------------------------------------------------|-------------------------------------------------------------------------------------------------------------------------------------------------------------------------------------------------------------------------------------------------------------------------------------------------------------------------------------------------------------------------------------------------------------------|--------------------------------------------------------------------------------------------------------------------------------------------------------------------------------------------------------------------------------------------------------------------------------------|
| Romaguera D et al, 2013, UK  | EPIC-InterAct Study                                     | 1991-2007, 11.7 years follow-up              | Sub-cohort: 15 374 participants, age 40-79, 11 684 cases | Country-specific validated dietary questionnaires | Self-report, validated by linkage to primary-care registers, secondary-care registers, medication use (drug registers), hospital admissions and mortality data | Juices and nectar                                                                                               | 0.0 g/d<br>17.1<br>100.0<br>338.3                                                                                                                                                                                                       | 1.00<br>0.97 (0.86, 1.10)<br>1.04 (0.96, 1.13)<br>1.06 (0.90, 1.25)                                                                                                                                                                                                                                                                                                                                               | Sex, educational level, physical activity, smoking status, alcohol consumption; juices and total soft drinks were mutually adjusted; sugar-sweetened and artificially sweetened soft drinks were also mutually adjusted plus adjustment for juice consumption, energy intake and BMI |
| Mursu J et al, 2014, Finland | Kuopio Ischaemic Heart Disease Risk Factor Study (KIHD) | 1984-1989 to 2006-2008, 19.3 years follow-up | 2332 men, age 42-60 years, 432 cases                     | Instructed 4-day food recording                   | Self-reported, diabetes register, blood glucose measurements and OGTT                                                                                          | Total fruit and vegetables<br>Fruit<br>Berries<br>Fruit and berry juices<br>Vegetables<br>Cruciferous vegetable | 90.94 g/d<br>192.50<br>284.80<br>469.26<br>0.71 g/d<br>33.82<br>99.13<br>241.25<br>0.00 g/d<br>14.68<br>41.04<br>108.55<br>0.00 g/d<br>39.03<br>128.21<br>387.25<br>36.29 g/d<br>82.73<br>128.18<br>231.92<br>0.00 g/d<br>3.76<br>14.28 | 1.00<br>0.79 (0.60, 1.03)<br>0.89 (0.68, 1.16)<br>0.76 (0.57, 1.02)<br>1.00<br>0.95 (0.72, 1.25)<br>0.87 (0.66, 1.15)<br>0.98 (0.75, 1.29)<br>1.00<br>1.15 (0.90, 1.47)<br>0.89 (0.68, 1.17)<br>0.65 (0.49, 0.88)<br>1.00<br>1.07 (0.82, 1.39)<br>1.03 (0.78, 1.34)<br>0.99 (0.74, 1.31)<br>1.00<br>0.90 (0.69, 1.17)<br>0.92 (0.70, 1.20)<br>0.81 (0.61, 1.07)<br>1.00<br>1.15 (0.89, 1.49)<br>0.89 (0.67, 1.76) | Age, examination years, BMI, WHR, smoking, education, leisure time physical activity, family history of diabetes, intake of energy, alcohol                                                                                                                                          |

|                                    |                                       |                                 |                                                                                                    |                                            |                                                                                                                                                                                                                                |                                                    |                                                        |                                                                                                               |                                                                                                                                                                                                                                                        |
|------------------------------------|---------------------------------------|---------------------------------|----------------------------------------------------------------------------------------------------|--------------------------------------------|--------------------------------------------------------------------------------------------------------------------------------------------------------------------------------------------------------------------------------|----------------------------------------------------|--------------------------------------------------------|---------------------------------------------------------------------------------------------------------------|--------------------------------------------------------------------------------------------------------------------------------------------------------------------------------------------------------------------------------------------------------|
|                                    |                                       |                                 |                                                                                                    |                                            |                                                                                                                                                                                                                                |                                                    | 43.95                                                  | 0.79 (0.59, 1.05)                                                                                             |                                                                                                                                                                                                                                                        |
| Qiao Y et al, 2014, USA            | Women's Health Initiative (WHI)       | 1993-2005, 7.6 years follow-up  | 154 493 participants, age 50-79 years, 10 307 cases                                                | Validated FFQ, 122 items                   | Self-reported, validated by medication and laboratory data                                                                                                                                                                     | Vegetables                                         | <3.01 serv/d<br>≥3.01                                  | 1.00<br>1.10 (0.96, 1.26)                                                                                     | Age, education, cigarette smoking, BMI, WHR, physical activity, log (daily energy intake), family history of diabetes, study arms and hormone therapy use                                                                                              |
| Lacoppidan SA et al, 2015, Denmark | Diet, Cancer, and Health cohort (DCH) | 1993-2011, 15.3 years follow-up | 55 060 participants (28 953 women, 26 107 men), age 50-64 years, 7366 cases (3269 women, 4097 men) | Validated FFQ, 192-items                   | Linkage to National Diabetes Registry                                                                                                                                                                                          | Apples and pears (women)<br>Apples and pears (men) | <70.99 g/d<br>≥71<br><55.99 g/d<br>≥56                 | 1.00<br>1.03 (0.96, 1.11)<br>1.00<br>0.97 (0.91, 1.04)                                                        | Age, schooling level, participation in sports, smoking status, alcohol intake, red and processed meat, total energy intake, BMI and waist circumference                                                                                                |
| Muraki I et al, 2016, USA          | Nurses' Health Study (NHS)            | 1984-2010, 22.4 years follow-up | 70 773 women, age 30-55 years, 7436 cases                                                          | Validated semi-quantitative FFQ, 116 items | Self-reported/supplemental questionnaire/the National Diabetes Data group criteria (before 1997) or American Diabetes criteria (after 1998). Questionnaire-confirmed diagnosis of T2D was reconfirmed by medical record review | Potatoes                                           | <1 serv/wk<br>1<br>2-4<br>5-6<br>≥7<br>Every 3 serv/wk | 1.00<br>1.08 (0.93, 1.26)<br>1.15 (1.00, 1.32)<br>1.22 (1.05, 1.40)<br>1.27 (1.04, 1.56)<br>1.08 (1.04, 1.13) | Age, ethnicity, smoking status, alcohol intake, multivitamin use, physical activity, a family history of diabetes, menopausal status and postmenopausal hormone use, oral contraceptive use, total energy intake, modified aHEI score and baseline BMI |



|                           |                                             |                                 |                                                         |                                            |                                                                                                                                                                                                                                 |                                           |                                                                                             |                                                                                                               |                                                                                                                                                                                                                                                      |
|---------------------------|---------------------------------------------|---------------------------------|---------------------------------------------------------|--------------------------------------------|---------------------------------------------------------------------------------------------------------------------------------------------------------------------------------------------------------------------------------|-------------------------------------------|---------------------------------------------------------------------------------------------|---------------------------------------------------------------------------------------------------------------|------------------------------------------------------------------------------------------------------------------------------------------------------------------------------------------------------------------------------------------------------|
| Muraki I et al, 2016, USA | Nurses' Health Study II (NHS II)            | 1991-2011, 18.4 years follow-up | 87 739 women, age 25-42 years, 4621 cases               | Validated semi-quantitative FFQ, 131 items | Self-reported/supplemental questionnaire/ the National Diabetes Data group criteria (before 1997) or American Diabetes criteria (after 1998).                                                                                   | Potatoes                                  | <1 serv/wk<br>1<br>2-4<br>5-6<br>≥7<br>Every 3 serv/wk                                      | 1.00<br>0.95 (0.78, 1.16)<br>0.99 (0.82, 1.19)<br>1.09 (0.90, 1.31)<br>1.38 (1.08, 1.76)<br>1.12 (1.05, 1.18) | Age, ethnicity, smoking status, alcohol intake, multivitamin use, physical activity, family history of diabetes, menopausal status and postmenopausal hormone use, oral contraceptive use, total energy intake, modified aHEI score and baseline BMI |
| Muraki I et al, 2016, USA | Health Professionals Follow-up Study (HPFS) | 1986-2010, 19.5 years follow-up | 40 669 men, age 40-75 years, 3305 cases                 | Validated semi-quantitative FFQ, 131 items | Self-reported/supplemental questionnaire/ the National Diabetes Data group criteria (before 1997) or American Diabetes criteria (after 1998). Questionnaire-confirmed diagnosis of T2D was reconfirmed by medical record review | Potatoes                                  | <1 serv/wk<br>1<br>2-4<br>5-6<br>≥7<br>Every 3 serv/wk                                      | 1.00<br>0.94 (0.76, 1.17)<br>1.03 (0.85, 1.24)<br>1.09 (0.89, 1.32)<br>1.38 (1.07, 1.78)<br>1.10 (1.03, 1.17) | Age, ethnicity, smoking status, alcohol intake, multivitamin use, physical activity, a family history of diabetes, total energy intake, modified aHEI score and baseline BMI                                                                         |
| Muraki et al, 2016, USA   | Nurses' Health Study (NHS)                  | 1984-2010, 21 years follow-up   | 70 773 women, age 30-55 years, 7436 cases<br><br>87 739 | Validated semi-quantitative FFQ, 116 items | Self-reported/supplemental questionnaire/ the National Diabetes Data group criteria (before 1997)                                                                                                                               | Baked, boiled or mashed potatoes (pooled) | Almost never to<br>1-3 serv/mo<br>1 serv/wk<br>2-4<br>≥5<br>Every 3 serv/wk<br>Almost never | 1.00<br>1.02 (0.95, 1.09)<br>1.03 (0.96, 1.10)<br>1.08 (1.00, 1.16)<br>1.04 (1.01, 1.08)<br>1.00              | Age, ethnicity, smoking status, alcohol intake, multivitamin use, physical activity, a family history of diabetes,                                                                                                                                   |

|                                   |                                             |                                 |                                                  |                                            |                                                                                                                                                |                                       |                                                                          |                                                                                                                                                         |                                                                                                                                                                                                                                                                                                                                                                                                                                                                             |
|-----------------------------------|---------------------------------------------|---------------------------------|--------------------------------------------------|--------------------------------------------|------------------------------------------------------------------------------------------------------------------------------------------------|---------------------------------------|--------------------------------------------------------------------------|---------------------------------------------------------------------------------------------------------------------------------------------------------|-----------------------------------------------------------------------------------------------------------------------------------------------------------------------------------------------------------------------------------------------------------------------------------------------------------------------------------------------------------------------------------------------------------------------------------------------------------------------------|
|                                   | Nurses' Health Study II (NHS II)            | 1991-2011, 18.4 years follow-up | women, age 25-42 years, 4621 cases               | Validated semi-quantitative FFQ, 131 items | or American Diabetes criteria (after 1998). In NHS and HPFS, questionnaire-confirmed diagnosis of T2D was reconfirmed by medical record review | French fries (pooled)                 | 1-3 serv/mo<br>1 serv/wk<br>2-4<br>≥5<br>Every 3 serv/wk                 | 1.11 (1.06, 1.17)<br>1.17 (1.11, 1.24)<br>1.26 (1.18, 1.35)<br>1.32 (1.13, 1.55)<br>1.19 (1.13, 1.25)                                                   | menopausal status, postmenopausal hormone use, oral contraceptive use (NHS and NHS II), total energy intake, modified aHEI score, baked, boiled or mashed potatoes (for french fries), and french fries (for baked, boiled, or mashed potatoes) and baseline BMI                                                                                                                                                                                                            |
|                                   | Health Professionals Follow-up Study (HPFS) | 1986-2010, 19.5 years follow-up | 40 669 men, age 40-75 years, 3305 cases          | Validated semi-quantitative FFQ, 131 items |                                                                                                                                                |                                       |                                                                          |                                                                                                                                                         |                                                                                                                                                                                                                                                                                                                                                                                                                                                                             |
|                                   |                                             | Median follow-up 20.0 years     |                                                  |                                            |                                                                                                                                                |                                       |                                                                          |                                                                                                                                                         |                                                                                                                                                                                                                                                                                                                                                                                                                                                                             |
| Alperet DJ et al, 2017, Singapore | Singapore Chinese Health Study (SCHS)       | 1993-2010, 10.9 years follow-up | 45 411 participants, age 45-74 years, 5207 cases | Validated semi-quantitative FFQ, 165 items | Self-reported, validated by linkage with a nationwide hospital-based discharge database and supplementary questionnaire                        | Total whole-fruit (all)               | 0.1 serv/wk<br>1.5<br>3.0<br>5.5<br>9.6<br>16.6<br>25.3<br>Per 3 serv/wk | 1.00<br>1.10 (0.92, 1.30)<br>1.15 (1.00, 1.32)<br>1.11 (0.98, 1.27)<br>1.06 (0.93, 1.21)<br>1.08 (0.93, 1.25)<br>1.08 (0.91, 1.27)<br>0.99 (0.98, 1.01) | Age, sex, dialect group, year of baseline interview, total daily energy intake, physical activity, education, smoking, alcohol intake, BMI, total vegetable intake, unsweetened soy intake, saturated fat intake, dairy intake, soft drink consumption, coffee intake, black and green tea intake, fruit- and vegetable-juice intake, mutually adjusted for individual fruits<br><br>Juice: adjusted for all the above, included dietary fiber, but not adjusted for fruit- |
|                                   |                                             |                                 |                                                  |                                            |                                                                                                                                                | Total whole-fruit (men)               | 0.0 serv/wk<br>1.5<br>3.0<br>5.5<br>9.6<br>16.6<br>25.5<br>Per 3 serv/wk | 1.00<br>1.01 (0.75, 1.35)<br>1.24 (0.99, 1.56)<br>1.25 (1.00, 1.54)<br>1.16 (0.94, 1.43)<br>1.24 (0.99, 1.56)<br>1.33 (1.04, 1.71)<br>1.01 (0.99, 1.03) |                                                                                                                                                                                                                                                                                                                                                                                                                                                                             |
|                                   |                                             |                                 |                                                  |                                            |                                                                                                                                                | Total whole-fruit (women)             | 0.2 serv/wk<br>1.5<br>3.0<br>5.5<br>9.6<br>16.6<br>25.1<br>Per 3 serv/wk | 1.00<br>1.14 (0.92, 1.41)<br>1.11 (0.93, 1.32)<br>1.04 (0.88, 1.23)<br>1.00 (0.85, 1.18)<br>0.97 (0.81, 1.17)<br>0.88 (0.71, 1.11)<br>0.97 (0.96, 0.99) |                                                                                                                                                                                                                                                                                                                                                                                                                                                                             |
|                                   |                                             |                                 |                                                  |                                            |                                                                                                                                                | Temperate fruit (all) <i>apples</i> , | 0.0 serv/wk<br>0.5                                                       | 1.00<br>1.00                                                                                                                                            |                                                                                                                                                                                                                                                                                                                                                                                                                                                                             |

|  |  |  |  |  |  |                         |               |                   |                            |
|--|--|--|--|--|--|-------------------------|---------------|-------------------|----------------------------|
|  |  |  |  |  |  | <i>pears, apricots,</i> | 1.3           | 0.95 (0.85, 1.06) | and vegetable-juice intake |
|  |  |  |  |  |  | <i>peaches, grapes,</i> | 2.9           | 0.98 (0.88, 1.09) |                            |
|  |  |  |  |  |  | <i>persimmon</i>        | 5.0           | 0.96 (0.87, 1.05) |                            |
|  |  |  |  |  |  |                         | 8.1           | 0.94 (0.83, 1.05) |                            |
|  |  |  |  |  |  | Temperate fruit         | 0.0 serv/wk   | 0.86 (0.77, 0.97) |                            |
|  |  |  |  |  |  | (men)                   | 0.5           | 1.00              |                            |
|  |  |  |  |  |  |                         | 1.3           | 0.99 (0.85, 1.16) |                            |
|  |  |  |  |  |  |                         | 2.9           | 1.02 (0.87, 1.19) |                            |
|  |  |  |  |  |  |                         | 5.0           | 1.03 (0.89, 1.19) |                            |
|  |  |  |  |  |  |                         | 8.1           | 0.99 (0.83, 1.17) |                            |
|  |  |  |  |  |  | Temperate fruit         | 0.0 serv/wk   | 0.97 (0.82, 1.16) |                            |
|  |  |  |  |  |  | (women)                 | 0.5           | 1.00              |                            |
|  |  |  |  |  |  |                         | 1.4           | 0.91 (0.78, 1.05) |                            |
|  |  |  |  |  |  |                         | 3.0           | 0.95 (0.82, 1.09) |                            |
|  |  |  |  |  |  |                         | 5.1           | 0.90 (0.79, 1.03) |                            |
|  |  |  |  |  |  |                         | 8.1           | 0.89 (0.76, 1.04) |                            |
|  |  |  |  |  |  | Apple (all)             | 0.0 serv/wk   | 0.79 (0.67, 0.92) |                            |
|  |  |  |  |  |  |                         | 0.5           | 1.00              |                            |
|  |  |  |  |  |  |                         | 1.0           | 0.97 (0.89, 1.05) |                            |
|  |  |  |  |  |  |                         | 2.5           | 0.93 (0.85, 1.02) |                            |
|  |  |  |  |  |  |                         | 5.0           | 0.93 (0.86, 1.01) |                            |
|  |  |  |  |  |  |                         | 7.0           | 0.90 (0.79, 1.03) |                            |
|  |  |  |  |  |  |                         | Per 3 serv/wk | 0.82 (0.74, 0.92) |                            |
|  |  |  |  |  |  | Apple (men)             | 0.0 serv/wk   | 0.93 (0.90, 0.97) |                            |
|  |  |  |  |  |  |                         | 0.5           | 1.00              |                            |
|  |  |  |  |  |  |                         | 1.0           | 0.93 (0.81, 1.06) |                            |
|  |  |  |  |  |  |                         | 2.5           | 0.98 (0.85, 1.12) |                            |
|  |  |  |  |  |  |                         | 5.0           | 0.94 (0.83, 1.07) |                            |
|  |  |  |  |  |  |                         | 7.0           | 0.94 (0.77, 1.14) |                            |
|  |  |  |  |  |  |                         | Per 3 serv/wk | 0.95 (0.80, 1.13) |                            |
|  |  |  |  |  |  | Apple (women)           | 0.0 serv/wk   | 0.98 (0.92, 1.04) |                            |
|  |  |  |  |  |  |                         | 0.5           | 1.00              |                            |
|  |  |  |  |  |  |                         | 1.0           | 0.99 (0.88, 1.11) |                            |
|  |  |  |  |  |  |                         | 2.5           | 0.91 (0.81, 1.02) |                            |
|  |  |  |  |  |  |                         | 5.0           | 0.92 (0.83, 1.03) |                            |
|  |  |  |  |  |  |                         | 7.0           | 0.87 (0.74, 1.03) |                            |
|  |  |  |  |  |  |                         | Per 3 serv/wk | 0.75 (0.64, 0.87) |                            |
|  |  |  |  |  |  | Pear (all)              | 0.0 serv/wk   | 0.90 (0.86, 0.95) |                            |
|  |  |  |  |  |  |                         | 0.5           | 1.00              |                            |
|  |  |  |  |  |  |                         | 1.0           | 0.99 (0.93, 1.06) |                            |

|  |  |  |  |  |                          |               |                   |  |
|--|--|--|--|--|--------------------------|---------------|-------------------|--|
|  |  |  |  |  |                          | 2.5           | 1.02 (0.94, 1.11) |  |
|  |  |  |  |  |                          | Per 3 serv/wk | 1.07 (0.97, 1.18) |  |
|  |  |  |  |  | Pear (men)               | 0.0 serv/wk   | 1.08 (0.99, 1.19) |  |
|  |  |  |  |  |                          | 0.5           | 1.00              |  |
|  |  |  |  |  |                          | 1.0           | 1.03 (0.93, 1.14) |  |
|  |  |  |  |  |                          | 2.5           | 1.01 (0.88, 1.14) |  |
|  |  |  |  |  |                          | Per 3 serv/wk | 1.05 (0.90, 1.23) |  |
|  |  |  |  |  | Pear (women)             | 0.0 serv/wk   | 1.07 (0.93, 1.23) |  |
|  |  |  |  |  |                          | 0.5           | 1.00              |  |
|  |  |  |  |  |                          | 1.0           | 0.97 (0.89, 1.06) |  |
|  |  |  |  |  |                          | 2.5           | 1.04 (0.93, 1.15) |  |
|  |  |  |  |  |                          | Per 3 serv/wk | 1.09 (0.96, 1.23) |  |
|  |  |  |  |  | Grapes (all)             | 0.0 serv/wk   | 1.10 (0.97, 1.23) |  |
|  |  |  |  |  |                          | 0.3           | 1.00              |  |
|  |  |  |  |  |                          | 1.3           | 0.95 (0.89, 1.01) |  |
|  |  |  |  |  |                          | 2.0           | 0.98 (0.88, 1.08) |  |
|  |  |  |  |  |                          | Per 3 serv/wk | 0.86 (0.75, 0.99) |  |
|  |  |  |  |  | Grapes (men)             | 0.0 serv/wk   | 0.87 (0.76, 0.99) |  |
|  |  |  |  |  |                          | 0.5           | 1.00              |  |
|  |  |  |  |  |                          | 1.3           | 0.97 (0.88, 1.06) |  |
|  |  |  |  |  |                          | 2.0           | 1.02 (0.87, 1.19) |  |
|  |  |  |  |  |                          | Per 3 serv/wk | 0.81 (0.65, 1.01) |  |
|  |  |  |  |  | Grapes (women)           | 0.0 serv/wk   | 0.87 (0.71, 1.07) |  |
|  |  |  |  |  |                          | 0.3           | 1.00              |  |
|  |  |  |  |  |                          | 1.3           | 0.94 (0.86, 1.02) |  |
|  |  |  |  |  |                          | 2.0           | 0.95 (0.83, 1.08) |  |
|  |  |  |  |  |                          | Per 3 serv/wk | 0.89 (0.75, 1.06) |  |
|  |  |  |  |  | Subtropical fruits (all) | 0.0 serv/wk   | 0.87 (0.73, 1.03) |  |
|  |  |  |  |  |                          | 0.5           | 1.00              |  |
|  |  |  |  |  |                          | 1.1           | 0.97 (0.89, 1.06) |  |
|  |  |  |  |  |                          | 2.5           | 0.99 (0.90, 1.09) |  |
|  |  |  |  |  |                          | 5.1           | 1.01 (0.93, 1.09) |  |
|  |  |  |  |  |                          | 7.1           | 0.98 (0.88, 1.10) |  |
|  |  |  |  |  |                          | Per 3 serv/wk | 1.01 (0.90, 1.12) |  |
|  |  |  |  |  | Subtropical fruits (men) | 0.0 serv/wk   | 1.00 (0.97, 1.04) |  |
|  |  |  |  |  |                          | 0.5           | 1.00              |  |
|  |  |  |  |  |                          | 1.1           | 0.96 (0.84, 1.11) |  |
|  |  |  |  |  |                          | 2.5           | 1.03 (0.89, 1.20) |  |
|  |  |  |  |  |                          | 5.1           | 1.07 (0.94, 1.22) |  |
|  |  |  |  |  |                          | 7.1           |                   |  |

|  |  |  |  |  |  |                            |               |                   |  |
|--|--|--|--|--|--|----------------------------|---------------|-------------------|--|
|  |  |  |  |  |  | Subtropical fruits (women) | 0.0 serv/wk   | 1.02 (0.85, 1.21) |  |
|  |  |  |  |  |  |                            | 0.5           | 1.07 (0.91, 1.26) |  |
|  |  |  |  |  |  |                            | 1.1           | 1.00              |  |
|  |  |  |  |  |  |                            | 2.5           | 0.99 (0.88, 1.11) |  |
|  |  |  |  |  |  |                            | 5.1           | 0.97 (0.86, 1.09) |  |
|  |  |  |  |  |  |                            | 7.1           | 0.97 (0.87, 1.08) |  |
|  |  |  |  |  |  | Oranges (all)              | 0.0 serv/wk   | 0.96 (0.83, 1.12) |  |
|  |  |  |  |  |  |                            | 0.6           | 0.96 (0.84, 1.11) |  |
|  |  |  |  |  |  |                            | 1.0           | 1.00              |  |
|  |  |  |  |  |  |                            | 2.5           | 0.96 (0.88, 1.05) |  |
|  |  |  |  |  |  |                            | 5.0           | 1.00 (0.92, 1.10) |  |
|  |  |  |  |  |  |                            | 7.0           | 1.01 (0.94, 1.09) |  |
|  |  |  |  |  |  |                            | Per 3 serv/wk | 1.07 (0.95, 1.21) |  |
|  |  |  |  |  |  | Oranges (men)              | 0.0 serv/wk   | 1.01 (0.91, 1.13) |  |
|  |  |  |  |  |  |                            | 0.6           | 1.02 (0.98, 1.06) |  |
|  |  |  |  |  |  |                            | 1.0           | 1.00              |  |
|  |  |  |  |  |  |                            | 2.5           | 0.93 (0.81, 1.07) |  |
|  |  |  |  |  |  |                            | 5.0           | 1.02 (0.89, 1.18) |  |
|  |  |  |  |  |  |                            | 7.0           | 1.09 (0.96, 1.22) |  |
|  |  |  |  |  |  |                            | Per 3 serv/wk | 1.10 (0.92, 1.32) |  |
|  |  |  |  |  |  | Oranges (women)            | 0.0 serv/wk   | 1.05 (0.89, 1.23) |  |
|  |  |  |  |  |  |                            | 0.6           | 1.03 (0.98, 1.09) |  |
|  |  |  |  |  |  |                            | 1.0           | 1.00              |  |
|  |  |  |  |  |  |                            | 2.5           | 0.99 (0.89, 1.12) |  |
|  |  |  |  |  |  |                            | 5.0           | 1.00 (0.89, 1.12) |  |
|  |  |  |  |  |  |                            | 7.0           | 0.98 (0.88, 1.08) |  |
|  |  |  |  |  |  |                            | Per 3 serv/wk | 1.06 (0.90, 1.24) |  |
|  |  |  |  |  |  | Tangerine (all)            | 0.0 serv/wk   | 1.00 (0.87, 1.15) |  |
|  |  |  |  |  |  |                            | 0.1           | 1.01 (0.96, 1.06) |  |
|  |  |  |  |  |  |                            | 1.5           | 1.00              |  |
|  |  |  |  |  |  |                            | 4.1           | 1.05 (0.99, 1.11) |  |
|  |  |  |  |  |  |                            | Per 3 serv/wk | 0.91 (0.77, 1.06) |  |
|  |  |  |  |  |  | Tangerine (men)            | 0.0 serv/wk   | 0.90 (0.79, 1.04) |  |
|  |  |  |  |  |  |                            | 0.1           | 0.90 (0.81, 1.00) |  |
|  |  |  |  |  |  |                            | 1.5           | 1.00              |  |
|  |  |  |  |  |  |                            | 4.1           | 1.03 (0.94, 1.13) |  |
|  |  |  |  |  |  |                            | Per 3 serv/wk | 0.94 (0.73, 1.20) |  |
|  |  |  |  |  |  | Tangerine (women)          | 0.0 serv/wk   | 0.87 (0.70, 1.08) |  |
|  |  |  |  |  |  |                            | 0.1           | 0.90 (0.77, 1.05) |  |
|  |  |  |  |  |  |                            | 1.5           | 1.00              |  |



|  |  |  |  |  |                        |               |                   |  |
|--|--|--|--|--|------------------------|---------------|-------------------|--|
|  |  |  |  |  |                        | 4.1           | 1.06 (0.98, 1.15) |  |
|  |  |  |  |  |                        | Per 3 serv/wk | 0.89 (0.72, 1.10) |  |
|  |  |  |  |  | Tropical fruit (all)   | 0.0 serv/wk   | 0.90 (0.75, 1.08) |  |
|  |  |  |  |  |                        | 0.6           | 0.88 (0.77, 1.01) |  |
|  |  |  |  |  |                        | 1.4           | 1.00              |  |
|  |  |  |  |  |                        | 2.8           | 1.02 (0.91, 1.16) |  |
|  |  |  |  |  |                        | 5.0           | 1.05 (0.93, 1.18) |  |
|  |  |  |  |  |                        | 10.0          | 1.05 (0.94, 1.17) |  |
|  |  |  |  |  | Tropical fruit (men)   | 0.0 serv/wk   | 1.01 (0.89, 1.14) |  |
|  |  |  |  |  |                        | 0.6           | 1.08 (0.95, 1.22) |  |
|  |  |  |  |  |                        | 1.4           | 1.00              |  |
|  |  |  |  |  |                        | 2.8           | 1.20 (0.97, 1.50) |  |
|  |  |  |  |  |                        | 5.0           | 1.12 (0.91, 1.38) |  |
|  |  |  |  |  |                        | 10.1          | 1.19 (0.98, 1.45) |  |
|  |  |  |  |  | Tropical fruit (women) | 0.0 serv/wk   | 1.16 (0.95, 1.41) |  |
|  |  |  |  |  |                        | 0.6           | 1.24 (1.01, 1.53) |  |
|  |  |  |  |  |                        | 1.4           | 1.00              |  |
|  |  |  |  |  |                        | 2.8           | 0.95 (0.81, 1.10) |  |
|  |  |  |  |  |                        | 5.0           | 1.02 (0.88, 1.17) |  |
|  |  |  |  |  |                        | 9.5           | 0.98 (0.86, 1.13) |  |
|  |  |  |  |  | Banana (all)           | 0.0 serv/wk   | 0.94 (0.80, 1.10) |  |
|  |  |  |  |  |                        | 0.5           | 0.99 (0.83, 1.17) |  |
|  |  |  |  |  |                        | 1.0           | 1.00              |  |
|  |  |  |  |  |                        | 2.5           | 0.99 (0.92, 1.07) |  |
|  |  |  |  |  |                        | 5.0           | 0.96 (0.89, 1.05) |  |
|  |  |  |  |  |                        | 7.0           | 0.96 (0.87, 1.05) |  |
|  |  |  |  |  |                        | Per 3 serv/wk | 1.04 (0.91, 1.19) |  |
|  |  |  |  |  | Banana (men)           | 0.0 serv/wk   | 1.09 (0.93, 1.29) |  |
|  |  |  |  |  |                        | 0.6           | 1.03 (0.98, 1.08) |  |
|  |  |  |  |  |                        | 1.0           | 1.00              |  |
|  |  |  |  |  |                        | 2.5           | 1.13 (0.99, 1.28) |  |
|  |  |  |  |  |                        | 5.0           | 1.12 (0.98, 1.28) |  |
|  |  |  |  |  |                        | 7.0           | 1.06 (0.92, 1.23) |  |
|  |  |  |  |  |                        | Per 3 serv/wk | 1.19 (0.99, 1.43) |  |
|  |  |  |  |  | Banana (women)         | 0.0 serv/wk   | 1.49 (1.20, 1.84) |  |
|  |  |  |  |  |                        | 0.5           | 1.11 (1.04, 1.19) |  |
|  |  |  |  |  |                        | 1.0           | 1.00              |  |
|  |  |  |  |  |                        | 2.5           | 0.93 (0.85, 1.03) |  |
|  |  |  |  |  |                        | 5.0           | 0.89 (0.80, 0.99) |  |
|  |  |  |  |  |                        | 7.0           | 0.91 (0.81, 1.03) |  |

|  |  |  |  |  |  |                      |               |                   |  |
|--|--|--|--|--|--|----------------------|---------------|-------------------|--|
|  |  |  |  |  |  | Papaya               | Per 3 serv/wk | 0.96 (0.78, 1.18) |  |
|  |  |  |  |  |  |                      | 0.0 serv/wk   | 0.77 (0.59, 1.01) |  |
|  |  |  |  |  |  |                      | 0.5           | 0.94 (0.87, 1.01) |  |
|  |  |  |  |  |  |                      | 1.0           | 1.00              |  |
|  |  |  |  |  |  |                      | 2.5           | 1.00 (0.93, 1.07) |  |
|  |  |  |  |  |  |                      | 5.0           | 0.92 (0.85, 1.00) |  |
|  |  |  |  |  |  | Papaya (men)         | Per 3 serv/wk | 0.94 (0.85, 1.03) |  |
|  |  |  |  |  |  |                      | 0.0 serv/wk   | 0.89 (0.78, 1.02) |  |
|  |  |  |  |  |  |                      | 0.5           | 0.94 (0.88, 1.00) |  |
|  |  |  |  |  |  |                      | 1.0           | 1.00              |  |
|  |  |  |  |  |  |                      | 2.5           | 1.01 (0.90, 1.13) |  |
|  |  |  |  |  |  |                      | 5.0           | 0.91 (0.80, 1.04) |  |
|  |  |  |  |  |  | Papaya (women)       | Per 3 serv/wk | 0.94 (0.81, 1.08) |  |
|  |  |  |  |  |  |                      | 0.0 serv/wk   | 0.83 (0.68, 1.00) |  |
|  |  |  |  |  |  |                      | 0.5           | 0.91 (0.83, 1.00) |  |
|  |  |  |  |  |  |                      | 1.0           | 1.00              |  |
|  |  |  |  |  |  |                      | 2.5           | 1.00 (0.91, 1.09) |  |
|  |  |  |  |  |  |                      | 5.0           | 0.93 (0.83, 1.03) |  |
|  |  |  |  |  |  | Watermelon (all)     | Per 3 serv/wk | 0.94 (0.82, 1.07) |  |
|  |  |  |  |  |  |                      | 0.0 serv/wk   | 0.97 (0.80, 1.17) |  |
|  |  |  |  |  |  |                      | 0.5           | 0.97 (0.88, 1.06) |  |
|  |  |  |  |  |  |                      | 1.0           | 1.00              |  |
|  |  |  |  |  |  |                      | 2.5           | 1.05 (0.98, 1.12) |  |
|  |  |  |  |  |  |                      | 5.0           | 1.06 (0.97, 1.15) |  |
|  |  |  |  |  |  | Watermelon (men)     | Per 3 serv/wk | 1.10 (0.98, 1.24) |  |
|  |  |  |  |  |  |                      | 0.0 serv/wk   | 1.10 (0.92, 1.32) |  |
|  |  |  |  |  |  |                      | 0.5           | 1.08 (0.98, 1.18) |  |
|  |  |  |  |  |  |                      | 1.0           | 1.00              |  |
|  |  |  |  |  |  |                      | 2.5           | 1.05 (0.95, 1.17) |  |
|  |  |  |  |  |  |                      | 5.0           | 1.10 (0.97, 1.26) |  |
|  |  |  |  |  |  | Watermelon (women)   | Per 3 serv/wk | 1.14 (0.97, 1.34) |  |
|  |  |  |  |  |  |                      | 0.0 serv/wk   | 1.17 (0.92, 1.49) |  |
|  |  |  |  |  |  |                      | 0.5           | 1.11 (0.98, 1.26) |  |
|  |  |  |  |  |  |                      | 1.0           | 1.00              |  |
|  |  |  |  |  |  |                      | 2.5           | 1.05 (0.96, 1.14) |  |
|  |  |  |  |  |  |                      | 5.0           | 1.02 (0.91, 1.15) |  |
|  |  |  |  |  |  | Honeydew melon (all) | Per 3 serv/wk | 1.08 (0.91, 1.28) |  |
|  |  |  |  |  |  |                      | 0.0 serv/wk   | 1.01 (0.76, 1.36) |  |
|  |  |  |  |  |  |                      | 0.3           | 1.05 (0.91, 1.20) |  |
|  |  |  |  |  |  |                      | 1.0           | 1.00              |  |

|                              |                                     |                                        |                                              |                                            |                                                                                    |                                                 |                                                                             |                                                                                                                                                                              |                                                                                                                                          |
|------------------------------|-------------------------------------|----------------------------------------|----------------------------------------------|--------------------------------------------|------------------------------------------------------------------------------------|-------------------------------------------------|-----------------------------------------------------------------------------|------------------------------------------------------------------------------------------------------------------------------------------------------------------------------|------------------------------------------------------------------------------------------------------------------------------------------|
|                              |                                     |                                        |                                              |                                            |                                                                                    | Honeydew melon (men)                            | 2.5<br>Per 3 serv/wk<br>0.0 serv/wk<br>0.3<br>1.0<br>2.5                    | 1.03 (0.97, 1.10)<br>0.94 (0.85, 1.04)<br>1.05 (0.92, 1.19)<br>1.02 (0.90, 1.16)<br>1.00<br>0.98 (0.89, 1.09)                                                                |                                                                                                                                          |
|                              |                                     |                                        |                                              |                                            |                                                                                    | Honeydew melon (women)                          | Per 3 serv/wk<br>0.0 serv/wk<br>0.3<br>1.0<br>2.5                           | 0.88 (0.76, 1.03)<br>0.98 (0.82, 1.18)<br>0.92 (0.76, 1.10)<br>1.00<br>1.06 (0.98, 1.15)                                                                                     |                                                                                                                                          |
|                              |                                     |                                        |                                              |                                            |                                                                                    | Total juice (all)                               | Per 3 serv/wk<br>0.0 serv/wk<br>0.5<br>1.0<br>2.5<br>7.0                    | 0.99 (0.87, 1.13)<br>1.10 (0.92, 1.32)<br>1.12 (0.94, 1.34)<br>1.00<br>1.03 (0.95, 1.12)<br>1.13 (1.04, 1.24)                                                                |                                                                                                                                          |
|                              |                                     |                                        |                                              |                                            |                                                                                    | Total juice (men)                               | Per 3 serv/wk<br>0.0 serv/wk<br>0.5<br>1.0<br>2.5<br>7.0                    | 1.05 (0.93, 1.18)<br>1.16 (1.00, 1.34)<br>1.08 (1.02, 1.16)<br>1.00<br>1.09 (0.96, 1.23)<br>1.16 (1.03, 1.32)                                                                |                                                                                                                                          |
|                              |                                     |                                        |                                              |                                            |                                                                                    | Total juice (women)                             | Per 3 serv/wk<br>0.0 serv/wk<br>0.5<br>1.0<br>2.5<br>7.0<br>Per 3 serv/wk   | 1.09 (0.93, 1.29)<br>1.15 (0.93, 1.41)<br>1.09 (1.00, 1.20)<br>1.00<br>0.99 (0.89, 1.11)<br>1.11 (0.99, 1.25)<br>1.01 (0.86, 1.20)<br>1.16 (0.94, 1.42)<br>1.07 (0.98, 1.18) |                                                                                                                                          |
| Auerbach BJ et al, 2017, USA | The Women's Health Initiative (WHI) | 1993-1998 to 2005, 7.8 years follow-up | 114 219 women, age 50-79 years, 11 488 cases | Validated semi-quantitative FFQ, 122 items | Self-reported, validated by medication inventory and fasting plasma glucose levels | 100% fruit juice<br><br><br><br><br>Whole fruit | ≤4 serv/wk<br>5-6<br>1 serv/d<br>2-3<br>≥4<br>≤4 serv/wk<br>5-6<br>1 serv/d | 1.00<br>1.01 (0.97, 1.07)<br>0.97 (0.93, 1.02)<br>0.97 (0.87, 1.08)<br>0.82 (0.53, 1.27)<br>1.00<br>1.03 (0.97, 1.08)<br>1.00 (0.94, 1.06)                                   | Age, education level, race/ethnicity, smoking status, physical activity, body mass index, hormone replacement therapy status, study arm, |

|                               |                                        |                                           |                                                   |                                                 |                                                                             |                         |                                                          |                                                                                                               |                                                                                                                                                                       |
|-------------------------------|----------------------------------------|-------------------------------------------|---------------------------------------------------|-------------------------------------------------|-----------------------------------------------------------------------------|-------------------------|----------------------------------------------------------|---------------------------------------------------------------------------------------------------------------|-----------------------------------------------------------------------------------------------------------------------------------------------------------------------|
|                               |                                        |                                           |                                                   |                                                 |                                                                             | Citrus fruits           | 2-3<br>≥4<br><4 serv/wk<br>5-6<br>1 serv/d<br>2-3        | 1.04 (0.96, 1.11)<br>0.93 (0.73, 1.18)<br>1.00<br>0.93 (0.87, 0.99)<br>0.96 (0.85, 1.08)<br>0.98 (0.65, 1.47) | and total energy intake                                                                                                                                               |
| Bahadoran Z et al, 2017, Iran | Tehran Lipid and Glucose Study (TLGS)  | 2006-2008 to 2012-2014, 6 years follow-up | 3052 participants, age ≥19 years, 150 cases       | Validated FFQ, 168 items                        | Fasting plasma glucose or medication use                                    | Allium vegetables       | 1.0 g/wk<br>10 g/wk<br>39 g/wk<br>Per each 10 g/wk       | 1.00<br>1.05 (0.69, 1.61)<br>0.86 (0.57, 1.31)<br>0.95 (0.91, 1.05)                                           | Age, diabetes risk score, physical activity, and dietary pattern scores                                                                                               |
| Du H et al, 2017, China       | The China Kadoorie Biobank Study (CKB) | 2004-2008 to 2013-2014 7 years follow-up  | 482 591 participants, age 30-79 years, 9504 cases | Administered laptop-based questionnaire on diet | Linkage with local disease and death registries, health insurance databases | Fresh fruit consumption | Never/rarely<br>Monthly<br>1-3 d/wk<br>4-6 d/wk<br>Daily | 1.00<br>0.99 (0.90, 1.09)<br>0.93 (0.84, 1.02)<br>0.93 (0.83, 1.04)<br>0.88 (0.83, 0.93)                      | Age, sex, region, education, income, alcohol, smoking, physical activity, survey season, BMI, family history of diabetes, dairy products, meat, preserved vegetables  |
| Lv J et al, 2017, China       | China Kadoorie Biobank (CKB)           | 2004-2008 to 2013, 7.2 years follow-up    | 461 211 participants, age 30-79 years, 8784 cases | Validated qualitative FFQ                       | Linkage with local disease and death registries                             | Vegetables and fruits   | Less than daily (either or both)<br>Daily (both)         | 1.00<br>0.91 (0.85, 0.97)                                                                                     | Age, sex, education, marital status, family history of diabetes, smoking, alcohol consumption, physical activity, red meat and wheat, BMI, WHR                        |
| Huang M et al, 2017, USA      | The Women's Health Initiative (WHI)    | 1993-1998 to 2010, 8.4 years follow-up    | 64 850 women, age 50-79 years, 4675 cases         | Validated semi-quantitative FFQ, 122 items      | Self-report, validated by medical record review and laboratory data         | Fruit drinks            | <1 serv/wk<br>1 serv/wk - <1 serv/d<br>≥ 1 serv/d        | 1.00<br>0.99 (0.85, 1.15)<br>1.33 (0.89, 1.98)                                                                | Age, race, marital status, family income, education, family history of diabetes, BMI, change in BMI, WHR, systolic blood pressure, insurance status, antihypertensive |

|                     |                                               |                                              |                                                   |                                        |                                                   |                                                                                                |                                                                      |                                                                                          |                                                                                                                                                                                                                                                                                               |
|---------------------|-----------------------------------------------|----------------------------------------------|---------------------------------------------------|----------------------------------------|---------------------------------------------------|------------------------------------------------------------------------------------------------|----------------------------------------------------------------------|------------------------------------------------------------------------------------------|-----------------------------------------------------------------------------------------------------------------------------------------------------------------------------------------------------------------------------------------------------------------------------------------------|
|                     |                                               |                                              |                                                   |                                        |                                                   |                                                                                                |                                                                      |                                                                                          | use, antihyperlipidemic use, hormone replacement therapy use, calibrated energy, sugar-sweetened beverages, glycemic load, glycemic index, Alternate Healthy Eating Index, cardiovascular history, hysterectomy history, smoking status, physical activity, sitting time, alcohol consumption |
| Mamluk L, 2017, USA | The NIH-AARP Diet and Health Study (NIH-AARP) | 1995-1996 to 2004-2006, 10.6 years follow-up | 401 909 participants, age >50 years, 22 782 cases | Validated self-reported FFQ, 124-items | Self-administered questionnaires or in interviews | Fruit intake<br>1.99<br>3.24<br>7.73<br>Total intake 1 portion/d                               | 0.82 portions/d<br>1.99<br>3.24<br>7.73<br>Total intake 1 portion/d  | 1.00<br>0.96 (0.91, 1.02)<br>0.95 (0.91, 0.99)<br>0.95 (0.91, 0.99)<br>1.00 (0.99, 1.01) | Age, sex, BMI, physical activity, energy intake, alcohol consumption, education, smoking                                                                                                                                                                                                      |
|                     |                                               |                                              |                                                   |                                        |                                                   | Vegetable intake<br>1.04 portions/d<br>2.02<br>3.20<br>6.41<br>Total intake 1 portion/d        | 1.04 portions/d<br>2.02<br>3.20<br>6.41<br>Total intake 1 portion/d  | 1.00<br>0.92 (0.87, 0.97)<br>0.88 (0.84, 0.94)<br>0.92 (0.87, 0.97)<br>1.00 (0.99, 1.01) |                                                                                                                                                                                                                                                                                               |
|                     |                                               |                                              |                                                   |                                        |                                                   | Leafy green vegetables<br>0.65 portions/wk<br>1.98<br>3.10<br>8.06<br>Total intake 1 portion/d | 0.65 portions/wk<br>1.98<br>3.10<br>8.06<br>Total intake 1 portion/d | 1.00<br>0.90 (0.86, 0.94)<br>0.89 (0.85, 0.94)<br>0.87 (0.84, 0.90)<br>0.98 (0.98, 0.99) |                                                                                                                                                                                                                                                                                               |
|                     |                                               |                                              |                                                   |                                        |                                                   | Cabbage<br>0.32 portions/wk<br>1.63                                                            | 0.32 portions/wk<br>1.63                                             | 1.00<br>1.06 (1.01, 1.12)                                                                |                                                                                                                                                                                                                                                                                               |



|                                |                                       |                                  |                                                  |                                            |                                                                                                                         |                             |                                                                         |                                                                                          |                                                                                          |                                                                                                                                                                                                                               |
|--------------------------------|---------------------------------------|----------------------------------|--------------------------------------------------|--------------------------------------------|-------------------------------------------------------------------------------------------------------------------------|-----------------------------|-------------------------------------------------------------------------|------------------------------------------------------------------------------------------|------------------------------------------------------------------------------------------|-------------------------------------------------------------------------------------------------------------------------------------------------------------------------------------------------------------------------------|
|                                |                                       |                                  |                                                  |                                            |                                                                                                                         |                             | 3.90<br>9.79<br>Total intake 1<br>portion/d                             | 1.09 (1.00, 1.18)<br>1.07 (0.94, 1.21)<br>1.02 (1.01, 1.03)                              |                                                                                          |                                                                                                                                                                                                                               |
| Mamluk L, 2017, Greece         | EPIC-elderly Greece                   | 1994-ongoing, 10 years follow-up | 7567 participants, age >50 years, 1077 cases     | Validated FFQ, 200 items                   | Self-administered questionnaires or in interviews                                                                       | Fruit intake                | 1.06 portions/d<br>2.08<br>3.28<br>5.29<br>Total intake 1<br>portion/d  | 1.00<br>1.12 (0.77, 1.64)<br>1.09 (0.77, 1.54)<br>1.09 (0.77, 1.55)<br>1.00 (0.96, 1.04) | Age, sex, BMI, physical activity, energy intake, alcohol consumption, education, smoking |                                                                                                                                                                                                                               |
|                                |                                       |                                  |                                                  |                                            |                                                                                                                         | Vegetable intake            | 1.15 portions/d<br>2.12<br>3.39<br>5.61<br>Total intake 1<br>portion/d  | 1.00<br>1.96 (0.81, 4.77)<br>2.29 (0.99, 5.36)<br>2.15 (0.93, 5.03)<br>0.99 (0.95, 1.04) |                                                                                          |                                                                                                                                                                                                                               |
|                                |                                       |                                  |                                                  |                                            |                                                                                                                         | Leafy green vegetables      | 0.87 portions/wk<br>2.13<br>3.13<br>6.18<br>Total intake 1<br>portion/d | 1.00<br>1.23 (0.89, 1.71)<br>1.55 (1.14, 2.11)<br>1.52 (1.13, 2.04)<br>1.02 (0.99, 1.04) |                                                                                          |                                                                                                                                                                                                                               |
|                                |                                       |                                  |                                                  |                                            |                                                                                                                         | Cabbage                     | 0.84 portions/wk<br>2.06<br>3.06<br>4.88<br>Total intake 1<br>portion/d | 1.00<br>0.93 (0.77, 1.11)<br>1.21 (1.07, 1.44)<br>1.09 (0.85, 1.41)<br>1.02 (0.98, 1.07) |                                                                                          |                                                                                                                                                                                                                               |
| Chen GC et al, 2018, Singapore | Singapore Chinese Health Study (SCHS) | 1993-2010, 10.9 years follow-up  | 45 411 participants, age 45-74 years, 5207 cases | Validated semi-quantitative FFQ, 165 items | Self-reported, validated by linkage with a nationwide hospital-based discharge database and supplementary questionnaire | Total vegetables            | 57.431 g/d<br>83.286<br>105.459<br>132.489<br>184.357                   | 1.00<br>1.16 (1.06, 1.26)<br>0.98 (0.89, 1.07)<br>1.02 (0.93, 1.11)<br>1.08 (0.98, 1.18) |                                                                                          | Age, sex, dialect group, year of baseline interview, energy intake, physical activity, education, smoking, alcohol, soft drink, coffee, energy-adjusted intakes of red meat, poultry, fish, nuts and seeds, soya products and |
|                                |                                       |                                  |                                                  |                                            |                                                                                                                         | Light green vegetables      | 14.181 g/d<br>22.094<br>28.989<br>37.608<br>55.001                      | 1.00<br>0.99 (0.90, 1.08)<br>0.98 (0.90, 1.08)<br>1.02 (0.93, 1.11)<br>0.95 (0.87, 1.04) |                                                                                          |                                                                                                                                                                                                                               |
|                                |                                       |                                  |                                                  |                                            |                                                                                                                         | Dark green leafy vegetables | 13.946 g/d<br>23.505                                                    | 1.00<br>0.96 (0.88, 1.04)                                                                |                                                                                          |                                                                                                                                                                                                                               |

|                                 |                                       |                                           |                                               |                          |                                              |                        |                                                                                  |                                                                                                                                                         |                                           |                                                                                                                                                                                                                                 |
|---------------------------------|---------------------------------------|-------------------------------------------|-----------------------------------------------|--------------------------|----------------------------------------------|------------------------|----------------------------------------------------------------------------------|---------------------------------------------------------------------------------------------------------------------------------------------------------|-------------------------------------------|---------------------------------------------------------------------------------------------------------------------------------------------------------------------------------------------------------------------------------|
|                                 |                                       |                                           |                                               |                          |                                              | Cruciferous vegetables | 32.201<br>43.484<br>65.735<br>18.882 g/d<br>30.243<br>40.428<br>53.278<br>79.211 | 1.03 (0.94, 1.12)<br>0.96 (0.88, 1.05)<br>1.05 (0.96, 1.15)<br>1.00<br>0.97 (0.89, 1.06)<br>1.02 (0.94, 1.12)<br>0.90 (0.82, 0.98)<br>0.97 (0.88, 1.06) | wholegrains, BMI, history of hypertension |                                                                                                                                                                                                                                 |
|                                 |                                       |                                           |                                               |                          |                                              | Yellow vegetables      | 0.938 g/d<br>3.525<br>5.954<br>9.480<br>18.568                                   | 1.00<br>0.94 (0.87, 1.03)<br>0.95 (0.87, 1.03)<br>1.05 (0.96, 1.14)<br>0.97 (0.88, 1.06)                                                                |                                           |                                                                                                                                                                                                                                 |
|                                 |                                       |                                           |                                               |                          |                                              | Potatoes               | 0.023 g/d<br>1.802<br>3.604<br>5.876<br>11.517                                   | 1.00<br>1.02 (0.94, 1.11)<br>0.97 (0.89, 1.06)<br>1.02 (0.94, 1.11)<br>0.95 (0.87, 1.04)                                                                |                                           |                                                                                                                                                                                                                                 |
|                                 |                                       |                                           |                                               |                          |                                              | Tomatoes               | 0.579 g/d<br>2.898<br>5.249<br>8.226<br>17.315                                   | 1.00<br>1.02 (0.93, 1.11)<br>1.08 (0.99, 1.18)<br>1.09 (1.00, 1.19)<br>1.06 (0.97, 1.16)                                                                |                                           |                                                                                                                                                                                                                                 |
|                                 |                                       |                                           |                                               |                          |                                              | Preserved vegetables   | 1.488 g/d<br>3.839<br>5.719<br>8.461<br>16.375                                   | 1.00<br>0.91 (0.84, 1.00)<br>0.95 (0.87, 1.04)<br>0.99 (0.90, 1.08)<br>0.97 (0.89, 1.06)                                                                |                                           |                                                                                                                                                                                                                                 |
| Farhadnejad H et al, 2018, Iran | Tehran Lipid and Glucose Study (TLGS) | 2006-2008 to 2012-2014, 6 years follow-up | 1981 participants, age 18-75 years, 132 cases | Validated FFQ, 168 items | Fasting plasma glucose levels (ADA criteria) | Total potato           | 7.30 g/d                                                                         | 1.00                                                                                                                                                    |                                           | Age, sex, BMI, physical activity, smoking, family history of diabetes, hypertension, serum triglycerides, high-density lipoprotein cholesterol, daily intakes of energy, saturated fat and food groups intake, including fruit, |
|                                 |                                       |                                           |                                               |                          |                                              |                        | 16.05                                                                            | 0.60 (0.34, 1.01)                                                                                                                                       |                                           |                                                                                                                                                                                                                                 |
|                                 |                                       |                                           |                                               |                          |                                              |                        | 29.22                                                                            | 0.75 (0.45, 1.26)                                                                                                                                       |                                           |                                                                                                                                                                                                                                 |
|                                 |                                       |                                           |                                               |                          |                                              | Boiled potato          | 55.50                                                                            | 0.46 (0.25, 0.84)                                                                                                                                       |                                           |                                                                                                                                                                                                                                 |
|                                 |                                       |                                           |                                               |                          |                                              |                        | 2.42 g/d                                                                         | 1.00                                                                                                                                                    |                                           |                                                                                                                                                                                                                                 |
|                                 |                                       |                                           |                                               |                          |                                              |                        | 10.38                                                                            | 0.65 (0.39, 1.08)                                                                                                                                       |                                           |                                                                                                                                                                                                                                 |
|                                 |                                       |                                           |                                               |                          |                                              | Fried potato           | 20.76                                                                            | 0.74 (0.43, 1.28)                                                                                                                                       |                                           |                                                                                                                                                                                                                                 |
|                                 |                                       |                                           |                                               |                          |                                              |                        | 36.3                                                                             | 0.47 (0.26, 0.85)                                                                                                                                       |                                           |                                                                                                                                                                                                                                 |
|                                 |                                       |                                           |                                               |                          |                                              |                        | 1.30 g/d                                                                         | 1.00                                                                                                                                                    |                                           |                                                                                                                                                                                                                                 |
|                                 |                                       |                                           |                                               |                          |                                              |                        | 4.66                                                                             | 0.82 (0.50, 1.35)                                                                                                                                       |                                           |                                                                                                                                                                                                                                 |
|                                 |                                       |                                           |                                               |                          |                                              |                        | 10.33                                                                            | 0.60 (0.35, 1.03)                                                                                                                                       |                                           |                                                                                                                                                                                                                                 |
|                                 |                                       |                                           |                                               |                          |                                              |                        | 25.71                                                                            | 0.50 (0.25, 1.07)                                                                                                                                       |                                           |                                                                                                                                                                                                                                 |

|                                      |                                       |                                             |                                                                     |                                            |                                                                                                                                                                                                                                |                                                                                                                                            |                                                                                                                                                                                                                                                                                                                                                                                                                   |                                                                                                                                                                                                                                                                                                                                                                                                                                                                                                                                                                      |                                                                                                                                                                                                                                                                                                                 |
|--------------------------------------|---------------------------------------|---------------------------------------------|---------------------------------------------------------------------|--------------------------------------------|--------------------------------------------------------------------------------------------------------------------------------------------------------------------------------------------------------------------------------|--------------------------------------------------------------------------------------------------------------------------------------------|-------------------------------------------------------------------------------------------------------------------------------------------------------------------------------------------------------------------------------------------------------------------------------------------------------------------------------------------------------------------------------------------------------------------|----------------------------------------------------------------------------------------------------------------------------------------------------------------------------------------------------------------------------------------------------------------------------------------------------------------------------------------------------------------------------------------------------------------------------------------------------------------------------------------------------------------------------------------------------------------------|-----------------------------------------------------------------------------------------------------------------------------------------------------------------------------------------------------------------------------------------------------------------------------------------------------------------|
|                                      |                                       |                                             |                                                                     |                                            |                                                                                                                                                                                                                                |                                                                                                                                            |                                                                                                                                                                                                                                                                                                                                                                                                                   |                                                                                                                                                                                                                                                                                                                                                                                                                                                                                                                                                                      | whole grains, vegetables, nuts and legumes                                                                                                                                                                                                                                                                      |
| Khalili-Moghadam S et al, 2018, Iran | Tehran Lipid and Glucose Study (TLGS) | 2006-2008 to 2012-2014, 5.8 years follow-up | 2139 participants (1168 women, 971 men), age 20-70 years, 143 cases | Validated semi-quantitative FFQ, 168 items | Fasting plasma glucose levels                                                                                                                                                                                                  | Vegetables<br><br>Fruit                                                                                                                    | 1.7 serv/d<br>2.6<br>3.8<br><br>2.1 serv/d<br>3.5<br>5.1                                                                                                                                                                                                                                                                                                                                                          | 1.00<br>0.75 (0.48, 1.17)<br>0.89 (0.57, 1.39)<br><br>1.00<br>1.14 (0.74, 1.75)<br>0.75 (0.46, 1.22)                                                                                                                                                                                                                                                                                                                                                                                                                                                                 | Diabetes risk score: family history of diabetes, FPG concentrations, SBP, WHtR and TG/HDL-C                                                                                                                                                                                                                     |
| Ma L et al, 2018, USA                | The Nurses' Health Study (NHS)        | 1984-2012, 23.6 years follow-up             | 71 256 women, age 30-55 years, 7586 cases                           | Validated FFQ, 116 items                   | Self-reported/supplemental questionnaire/the National Diabetes Data group criteria (before 1997) or American Diabetes criteria (after 1998). Questionnaire-confirmed diagnosis of T2D was reconfirmed by medical record review | Total cruciferous vegetables<br><br>Broccoli<br><br>Cabbage<br><br>Cauliflower<br><br>Brussel sprouts<br><br>Kale, mustard or chard greens | <1 serv/wk<br>1-3<br>4-6<br>≥1 serv/d<br>Every 2 serv/wk<br><0.5 serv/wk<br>0.5-1<br>2-3<br>≥4<br>Every 2 serv/wk<br>Never/almost never<br><0.5 serv/wk<br>0.5-1<br>≥1<br>Every 2 serv/wk<br>Never/almost never<br><0.5 serv/wk<br>0.5-1<br>≥1<br>Every 2 serv/wk<br>Never/almost never<br><0.5 serv/wk<br>0.5-1<br>≥1<br>Every 2 serv/wk<br>Never/almost never<br><0.5 serv/wk<br>0.5-1<br>≥1<br>Every 2 serv/wk | 1.00<br>1.14 (1.04, 1.25)<br>1.23 (1.11, 1.36)<br>1.22 (1.07, 1.38)<br>1.03 (1.01, 1.05)<br>1.00<br>1.03 (0.95, 1.11)<br>1.07 (1.00, 1.15)<br>0.92 (0.77, 1.09)<br>1.01 (0.96, 1.05)<br>1.00<br>1.12 (1.00, 1.24)<br>1.22 (1.09, 1.36)<br>1.25 (1.12, 1.39)<br>1.10 (1.04, 1.17)<br>1.00<br>0.99 (0.91, 1.08)<br>1.04 (0.96, 1.14)<br>1.07 (0.98, 1.17)<br>1.05 (0.99, 1.10)<br>1.00<br>1.08 (1.03, 1.14)<br>1.14 (1.06, 1.24)<br>1.27 (1.16, 1.40)<br>1.28 (1.16, 1.40)<br>1.00<br>1.03 (0.96, 1.10)<br>0.98 (0.84, 1.15)<br>1.04 (0.87, 1.24)<br>1.04 (0.89, 1.21) | Age, race/ethnicity, family history of diabetes, smoking status, alcohol intake, physical activity, menopausal status and postmenopausal hormone use, oral contraceptive use, multivitamin use, hypertension, hypercholesterolemia, BMI, total energy intake, the modified alternate healthy eating index score |

|                       |                                                 |                                 |                                           |                          |                                                                                                                                               |                              |                                                                                                                                                                                                                                                                                                                                                                                                                    |                                                                                                                                                                                                                                                                                                                                                                                                                                                                                                                                                                      |                                                                                                                                                                                                                                                                                                                     |
|-----------------------|-------------------------------------------------|---------------------------------|-------------------------------------------|--------------------------|-----------------------------------------------------------------------------------------------------------------------------------------------|------------------------------|--------------------------------------------------------------------------------------------------------------------------------------------------------------------------------------------------------------------------------------------------------------------------------------------------------------------------------------------------------------------------------------------------------------------|----------------------------------------------------------------------------------------------------------------------------------------------------------------------------------------------------------------------------------------------------------------------------------------------------------------------------------------------------------------------------------------------------------------------------------------------------------------------------------------------------------------------------------------------------------------------|---------------------------------------------------------------------------------------------------------------------------------------------------------------------------------------------------------------------------------------------------------------------------------------------------------------------|
| Ma L et al, 2018, USA | The Nurses' Health Study II (NHS II)            | 1991-2013, 20.2 years follow-up | 88 293 women, age 24-44 years, 5438 cases | Validated FFQ, 131 items | Self-reported/ supplemental questionnaire/ the National Diabetes Data group criteria (before 1997) or American Diabetes criteria (after 1998) | Total cruciferous vegetables | <1 serv/wk<br>1-3<br>4-6<br>≥ 1 serv/d<br>Every 2 serv/wk<br><0.5 serv/wk<br>0.5-1<br>2-3<br>≥4<br>Every 2 serv/wk<br>Never/almost never<br><0.5 serv/wk<br>0.5-1<br>≥1<br>Every 2 serv/wk<br>Never/almost never<br><0.5 serv/wk<br>0.5-1<br>≥1<br>Every 2 serv/wk<br>Never/almost never<br><0.5 serv/wk<br>0.5-1<br>≥1<br>Every 2 serv/wk<br>Never/almost never<br><0.5 serv/wk<br>0.5-1<br>≥1<br>Every 2 serv/wk | 1.00<br>1.00 (0.93, 1.07)<br>1.10 (1.00, 1.20)<br>1.10 (0.98, 1.24)<br>1.02 (1.00, 1.04)<br>1.00<br>0.91 (0.82, 1.01)<br>0.98 (0.92, 1.05)<br>1.06 (0.91, 1.23)<br>1.00 (0.96, 1.04)<br>1.00<br>0.97 (0.91, 1.04)<br>0.95 (0.85, 1.07)<br>1.13 (1.04, 1.23)<br>1.05 (0.99, 1.11)<br>1.00<br>0.95 (0.88, 1.02)<br>0.91 (0.81, 1.02)<br>1.05 (0.98, 1.14)<br>1.05 (1.00, 1.11)<br>1.00<br>1.04 (0.97, 1.11)<br>1.09 (0.93, 1.27)<br>1.09 (0.98, 1.22)<br>1.11 (1.01, 1.23)<br>1.00<br>1.05 (0.95, 1.16)<br>1.20 (0.93, 1.54)<br>1.16 (0.97, 1.38)<br>1.07 (1.00, 1.16) | Age, race/ethnicity, family history of diabetes, smoking status, alcohol intake, physical activity, menopausal status and postmenopausal hormone use, oral contraceptive use, multivitamin use, hypertension, hypercholesterolemia, BMI, total energy intake, and the modified alternate healthy eating index score |
| Ma L et al, 2018, USA | The Health Professionals Follow-up Study (HPFS) | 1986-2012, 20.3 years follow-up | 41 358 men, age 40-75 years, 3543 cases   | Validated FFQ, 131 items | Self-reported/ supplemental questionnaire/ the National Diabetes Data group criteria (before 1997) or American Diabetes criteria              | Total cruciferous vegetables | <1 serv/wk<br>1-3<br>4-6<br>≥ 1 serv/d<br>Every 2 serv/wk<br><0.5 serv/wk<br>0.5-1<br>2-3<br>≥4<br>Every 2 serv/wk                                                                                                                                                                                                                                                                                                 | 1.00<br>0.98 (0.88, 1.09)<br>1.04 (0.92, 1.18)<br>1.17 (1.00, 1.36)<br>1.03 (1.01, 1.06)<br>1.00<br>1.07 (0.97, 1.19)<br>1.02 (0.93, 1.11)<br>1.38 (1.10, 1.72)<br>1.03 (0.98, 1.09)                                                                                                                                                                                                                                                                                                                                                                                 | Age, race/ethnicity, family history of diabetes, smoking status, alcohol intake, physical activity, multivitamin use, hypertension, hypercholesterolemia, BMI, total energy                                                                                                                                         |

|                              |                                                                |                                 |                                              |                                           |                                                                                                              |                                                                            |                                                                                                                                                                                                                                                                                              |                                                                                                                                                                                                                                                                                                                                                                              |                                                                                                                                                                                               |
|------------------------------|----------------------------------------------------------------|---------------------------------|----------------------------------------------|-------------------------------------------|--------------------------------------------------------------------------------------------------------------|----------------------------------------------------------------------------|----------------------------------------------------------------------------------------------------------------------------------------------------------------------------------------------------------------------------------------------------------------------------------------------|------------------------------------------------------------------------------------------------------------------------------------------------------------------------------------------------------------------------------------------------------------------------------------------------------------------------------------------------------------------------------|-----------------------------------------------------------------------------------------------------------------------------------------------------------------------------------------------|
|                              |                                                                |                                 |                                              |                                           | (after 1998).<br>Questionnaire-confirmed diagnosis of T2D was reconfirmed by medical record review           | Cabbage<br>Cauliflower<br>Brussel sprouts<br>Kale, mustard or chard greens | Never/almost never<br><0.5 serv/wk<br>0.5-1<br>≥1<br>Every 2 serv/wk<br>Never/almost never<br><0.5 serv/wk<br>0.5-1<br>≥1<br>Every 2 serv/wk<br>Never/almost never<br><0.5 serv/wk<br>0.5-1<br>≥1<br>Every 2 serv/wk<br>Never/almost never<br><0.5 serv/wk<br>0.5-1<br>≥1<br>Every 2 serv/wk | 1.00<br>0.99 (0.86, 1.13)<br>1.11 (0.94, 1.32)<br>1.09 (0.97, 1.23)<br>1.00 (0.99, 1.02)<br>1.00<br>0.92 (0.84, 1.02)<br>1.00 (0.89, 1.12)<br>1.01 (0.90, 1.12)<br>1.04 (0.96, 1.13)<br>1.00<br>1.01 (0.94, 1.09)<br>1.11 (0.98, 1.25)<br>1.16 (1.03, 1.31)<br>1.11 (1.00, 1.24)<br>1.00<br>1.04 (0.95, 1.14)<br>1.07 (0.88, 1.30)<br>1.09 (0.90, 1.31)<br>1.08 (0.94, 1.24) | intake, and the modified alternate healthy eating index score                                                                                                                                 |
| Dow C et al, 2019, Australia | The Australian Diabetes, Obesity and Lifestyle Study (AusDiab) | 1999-2012, 11.7 years follow-up | 6242 participants, age ≥ 25 years, 376 cases | Validated semi-quantitative FFQ, 80 items | Standard oral glucose tolerance test                                                                         | Vegetables<br>Fruit                                                        | <2.5 serv/d<br>2.5-4.9<br>5.0-5.9<br>≥6<br><0.75 serv/d<br>0.75-1.4<br>1.5-2.4<br>≥2.5                                                                                                                                                                                                       | 1.00<br>0.89 (0.72, 1.11)<br>0.83 (0.37, 1.88)<br>0.29 (0.04, 2.10)<br>1.00<br>0.81 (0.62, 1.05)<br>0.68 (0.51, 0.91)<br>1.04 (0.76, 1.43)                                                                                                                                                                                                                                   | Age, sex, education, smoking status, recreational physical activity, high triglycerides, low HDL cholesterol, family history of diabetes, energy intake, hypertension and waist circumference |
| Lee DH et al, 2019, USA      | The Nurses' Health Study (NHS)                                 | 1986-2012, 22 years follow-up   | 67 139 women, age 30-55 years, 6946 cases    | Validated FFQ, 116 items                  | Self-reported/supplemental questionnaire/the National Diabetes Data group criteria (before 1997) or American | Mushrooms                                                                  | Never/almost never<br><1 serv/wk<br>1<br>2-4<br>≥5<br>Per 2 serv/wk increase                                                                                                                                                                                                                 | 1.00<br>1.03 (0.96, 1.10)<br>1.10 (1.02, 1.18)<br>1.18 (1.08, 1.28)<br>1.04 (0.91, 1.19)<br>1.00 (0.98, 1.03)                                                                                                                                                                                                                                                                | Age, total calorie intake, smoking, physical activity, race, family history of type 2 diabetes, baseline high blood cholesterol, baseline high blood pressure, alcohol intake,                |

|                                       |                                                                                 |                                        |                                                   |                          |                                                                                                                                                                                                                                   |                                 |                                                                              |                                                                                                               |                                                                                                                                                                                                                                                      |
|---------------------------------------|---------------------------------------------------------------------------------|----------------------------------------|---------------------------------------------------|--------------------------|-----------------------------------------------------------------------------------------------------------------------------------------------------------------------------------------------------------------------------------|---------------------------------|------------------------------------------------------------------------------|---------------------------------------------------------------------------------------------------------------|------------------------------------------------------------------------------------------------------------------------------------------------------------------------------------------------------------------------------------------------------|
|                                       |                                                                                 |                                        |                                                   |                          | Diabetes criteria (after 1998). Questionnaire -confirmed diagnosis of T2D was reconfirmed by medical record review                                                                                                                |                                 |                                                                              |                                                                                                               | multivitamin use, Prudent dietary pattern, Western dietary pattern, menopausal status and postmenopausal hormone use                                                                                                                                 |
| Lee DH et al, 2019, USA               | The Health Professionals Follow-up Study (HPFS)                                 | 1986-2012, 19.8 years follow-up        | 43 541 men, age 40-75 years, 3544 cases           | Validated FFQ, 131 items | Self-reported/ supplemental questionnaire/ the National Diabetes Data group criteria (before 1997) or American Diabetes criteria (after 1998). Questionnaire -confirmed diagnosis of T2D was reconfirmed by medical record review | Mushrooms                       | Never/almost never<br><1 serv/wk<br>1<br>2-4<br>≥5<br>Per 2 serv/wk increase | 1.00<br>1.03 (0.94, 1.13)<br>1.02 (0.92, 1.13)<br>1.01 (0.89, 1.14)<br>1.04 (0.83, 1.31)<br>0.98 (0.94, 1.03) | Age, total calorie intake, smoking, physical activity, race, family history of type 2 diabetes, baseline high blood cholesterol, baseline high blood pressure, alcohol intake, multivitamin use, Prudent dietary pattern and Western dietary pattern |
| Scheffers FR et al, 2020, Netherlands | European Prospective Investigation into Cancer and Nutrition- Netherlands Study | 1993-1997 - 2010, 14.6 years follow-up | 36 147 men and women, age 20-69 years, 1477 cases | Validated FFQ, 178 items | Linkage to hospital discharge, diagnosis registry, and follow-up questionnaires , validated (up to 2006) by consulting the general practitioner or                                                                                | Pure fruit juice (150 ml/glass) | Non-drinker<br><1 glass/wk<br>1-<4<br>4-<8<br>≥8                             | 1.00<br>1.00 (0.85-1.17)<br>0.98 (0.84-1.14)<br>0.97 (0.84-1.14)<br>0.98 (0.80-1.21)                          | Age, sex, education, physical activity, smoking, family history of diabetes, Dutch Healthy Diet Index 2015, alcohol, coffee, sugar-sweetened beverages, fruit, BMI, waist circumference                                                              |



|                                 |                                                 |                               |                                                         |                         |                                                                                                                              |                                                                                                                                      |                                                                                                                   |                                                                                                                                                                                                          |                                                                                                                                                                                                                                                                                                       |
|---------------------------------|-------------------------------------------------|-------------------------------|---------------------------------------------------------|-------------------------|------------------------------------------------------------------------------------------------------------------------------|--------------------------------------------------------------------------------------------------------------------------------------|-------------------------------------------------------------------------------------------------------------------|----------------------------------------------------------------------------------------------------------------------------------------------------------------------------------------------------------|-------------------------------------------------------------------------------------------------------------------------------------------------------------------------------------------------------------------------------------------------------------------------------------------------------|
|                                 |                                                 |                               |                                                         |                         | pharmacist and general practitioner (after 2006)                                                                             |                                                                                                                                      |                                                                                                                   |                                                                                                                                                                                                          |                                                                                                                                                                                                                                                                                                       |
| Rayner J et al, 2020, Australia | Australian Longitudinal Study on Women's Health | 2001-2016, 15 years follow-up | 9689 women, age 50-55 years, 959 cases                  | Validated FFQ, 80 items | Self-reported T2D were obtained at follow-up surveys and validated against hospital discharge data in a subset of the cohort | Fruit<br><br>Fruit juice<br><br>Vegetables                                                                                           | 0.62 serv/d<br>1.18<br>1.77<br>2.74<br>0.01 serv/d<br>0.10<br>0.43<br>1.30<br>1.11 serv/d<br>1.75<br>2.26<br>3.28 | 1.22 (1.01-1.48)<br>1.06 (0.88-1.26)<br>1.10 (0.88-1.36)<br>1.00<br>0.94 (0.80-1.10)<br>0.90 (0.75-1.07)<br>0.95 (0.82-1.11)<br>1.00<br>1.03 (0.84-1.26)<br>1.02 (0.82-1.26)<br>1.01 (0.87-1.19)<br>1.00 | Age, country of birth, energy intake, highest educational qualification, employment status, years of follow-up, history of gestational diabetes, physical activity, cereal, high fiber bread, pasta and rice, discretionary foods, white bread, dairy, red and processed meat, fish, BMI, added sugar |
| Ahmed A et al, 2020, Sweden     | Stockholm Public Health Cohort                  | 2010-2014, 4 years follow-up  | 14 718 men and 20 589 women, age 25-84 years, 319 cases | FFQ                     | Self-report                                                                                                                  | Vegetables (men)<br>Fruit (men)<br>Fruit and vegetables (men)<br>Vegetables (women)<br>Fruit (women)<br>Fruit and vegetables (women) | ≥2 serv/d<br><2<br>≥2 serv/d<br><2<br>≥4 serv/d<br><4<br>≥2 serv/d<br><2<br>≥2 serv/d<br><2<br>≥4 serv/d<br><4    | 1.00<br>1.62 (1.00-2.61)<br>1.00<br>1.04 (0.60-1.59)<br>1.00<br>1.17 (0.66-2.08)<br>1.00<br>1.18 (0.82-1.71)<br>1.00<br>0.90 (0.65-1.26)<br>1.00<br>1.07 (0.73-1.58)                                     | Age, education, BMI, smoking, alcohol, physical activity                                                                                                                                                                                                                                              |

**Supplemental Table 5.** Modified Newcastle-Ottawa Scale (NOS) assessment of the included cohort studies

| Author, year          | Selection                       |                        |                                               | Comparability                   | Outcome assessment |                                  |                                   | Total |
|-----------------------|---------------------------------|------------------------|-----------------------------------------------|---------------------------------|--------------------|----------------------------------|-----------------------------------|-------|
|                       | Selection of non-exposed cohort | Exposure ascertainment | Demonstration of outcome not present at start | 0.25 points for each adjustment | Outcome assessment | Long enough follow-up (≥5 years) | Adequacy of follow-up (≤10% lost) |       |
| Ford, 2000            | 1                               | 1                      | 1                                             | 2                               | 0.5                | 1                                | 0                                 | 6.5   |
| Meyer, 2000           | 1                               | 1                      | 1                                             | 2                               | 1                  | 1                                | 0                                 | 7     |
| Knekt, 2002           | 1                               | 1                      | 1                                             | 0.75                            | 0.5                | 1                                | 0                                 | 5.25  |
| Hodge, 2004           | 1                               | 0                      | 1                                             | 2                               | 1                  | 0                                | 1                                 | 6     |
| Liu, 2004             | 1                               | 1                      | 1                                             | 2                               | 1                  | 1                                | 0                                 | 7     |
| Schulze, 2004         | 1                               | 1                      | 1                                             | 2                               | 1                  | 1                                | 1                                 | 8     |
| Montonen, 2005        | 1                               | 1                      | 1                                             | 1.75                            | 0.5                | 1                                | 0                                 | 6.25  |
| Song, 2005            | 1                               | 1                      | 1                                             | 2                               | 1                  | 1                                | 0                                 | 7     |
| Wang, 2006            | 1                               | 1                      | 1                                             | 2                               | 1                  | 1                                | 0                                 | 7     |
| Montonen, 2007        | 1                               | 1                      | 1                                             | 2                               | 0.5                | 1                                | 0                                 | 6.5   |
| Bazzano, 2008         | 1                               | 1                      | 1                                             | 2                               | 1                  | 1                                | 0                                 | 7     |
| Palmer, 2008          | 1                               | 1                      | 1                                             | 2                               | 1                  | 1                                | 0                                 | 7     |
| Villegas, 2008        | 1                               | 1                      | 1                                             | 2                               | 0                  | 0                                | 1                                 | 6     |
| de Koning, 2011       | 1                               | 1                      | 1                                             | 2                               | 1                  | 1                                | 1                                 | 8     |
| Cooper, 2012          | 1                               | 1                      | 1                                             | 2                               | 0.5                | 1                                | 1                                 | 7.5   |
| Elwood, 2013          | 1                               | 0                      | 0                                             | 0.5                             | 0                  | 1                                | 0                                 | 2.5   |
| Eshak, 2013           | 1                               | 1                      | 1                                             | 2                               | 1                  | 1                                | 0                                 | 7     |
| Fagherazzi, 2013      | 1                               | 1                      | 1                                             | 2                               | 1                  | 1                                | 1                                 | 8     |
| Jacques, 2013         | 1                               | 0                      | 1                                             | 1.5                             | 1                  | 1                                | 0                                 | 5.5   |
| Kurotani, 2013        | 1                               | 1                      | 1                                             | 2                               | 1                  | 1                                | 0                                 | 7     |
| Muraki (NHS), 2013    | 1                               | 1                      | 1                                             | 2                               | 1                  | 1                                | 1                                 | 8     |
| Muraki (NHS II), 2013 | 1                               | 1                      | 1                                             | 2                               | 1                  | 1                                | 1                                 | 8     |

|                                    |   |   |   |      |     |   |   |      |
|------------------------------------|---|---|---|------|-----|---|---|------|
| Muraki, (HPFS) 2013                | 1 | 1 | 1 | 2    | 1   | 1 | 1 | 8    |
| Romaguera, 2013                    | 1 | 1 | 1 | 2    | 0.5 | 1 | 0 | 6.5  |
| Mursu, 2014                        | 1 | 1 | 1 | 2    | 1   | 1 | 1 | 8    |
| Qiao, 2014                         | 1 | 1 | 1 | 2    | 1   | 1 | 0 | 7    |
| Lacoppidan, 2015                   | 1 | 0 | 1 | 2    | 0.5 | 1 | 0 | 5.5  |
| Muraki (NHS), 2016                 | 1 | 1 | 1 | 2    | 1   | 1 | 0 | 7    |
| Muraki (NHS II), 2016              | 1 | 1 | 1 | 2    | 1   | 1 | 0 | 7    |
| Muraki (HPFS), 2016                | 1 | 1 | 1 | 2    | 1   | 1 | 0 | 7    |
| Muraki (NHS, NHS II, HPFS), 2016   | 1 | 1 | 1 | 2    | 1   | 1 | 0 | 7    |
| Alperet, 2017                      | 1 | 1 | 1 | 2    | 1   | 1 | 0 | 7    |
| Auerbach, 2017                     | 1 | 1 | 1 | 2    | 1   | 1 | 0 | 7    |
| Bahadoran, 2017                    | 1 | 1 | 1 | 1    | 1   | 1 | 0 | 6    |
| Du, 2017                           | 1 | 0 | 1 | 2    | 1   | 1 | 1 | 7.0  |
| Huang, 2017                        | 1 | 1 | 1 | 2    | 1   | 1 | 0 | 7    |
| Ly, 2017                           | 1 | 0 | 1 | 2    | 1   | 1 | 1 | 7.0  |
| Mamluk (NIH-AARP), 2017            | 1 | 1 | 1 | 2    | 0   | 1 | 0 | 6    |
| Mamluk (EPIC-Elderly Greece), 2017 | 1 | 1 | 1 | 2    | 0   | 1 | 0 | 6    |
| Chen, 2018                         | 1 | 1 | 1 | 2    | 1   | 1 | 0 | 7    |
| Farhadnejad, 2018                  | 1 | 1 | 1 | 2    | 1   | 1 | 0 | 7    |
| Khalili-Moghadam, 2018             | 1 | 1 | 1 | 1.25 | 1   | 1 | 0 | 6.25 |
| Ma (NHS), 2018                     | 1 | 1 | 1 | 2    | 1   | 1 | 0 | 7    |
| Ma (NHS II), 2018                  | 1 | 1 | 1 | 2    | 1   | 1 | 0 | 7    |
| Ma (HPFS), 2018                    | 1 | 1 | 1 | 2    | 1   | 1 | 0 | 7    |
| Dow, 2019                          | 1 | 1 | 1 | 2    | 1   | 1 | 0 | 7    |
| Lee (NHS), 2019                    | 1 | 1 | 1 | 2    | 1   | 1 | 1 | 8    |

|                  |   |   |   |     |     |   |   |     |
|------------------|---|---|---|-----|-----|---|---|-----|
| Lee (HPFS), 2019 | 1 | 1 | 1 | 2   | 1   | 1 | 1 | 8   |
| Scheffers, 2020  | 1 | 1 | 1 | 2   | 1   | 1 | 0 | 7   |
| Rayner, 2020     | 1 | 1 | 1 | 2   | 0.5 | 1 | 0 | 6.5 |
| Ahmed, 2020      | 1 | 0 | 1 | 1.5 | 0   | 0 | 0 | 3.5 |

**Supplemental Table 6.** Relative risks (95% confidence intervals) from nonlinear analysis of fruit and vegetable intake and type 2 diabetes

| Fruit and vegetables (n=8) |                  | Fruits (n=19) |                  | Vegetables (n=15) |                  |
|----------------------------|------------------|---------------|------------------|-------------------|------------------|
| g/d                        | RR (95% CI)      | g/d           | RR (95% CI)      | g/d               | RR (95% CI)      |
| 0                          | 1.00             | 0             | 1.00             | 24                | 1.00             |
| 100                        | 0.97 (0.94-1.00) | 100           | 0.92 (0.88-0.95) | 100               | 0.94 (0.89-0.98) |
| 200                        | 0.95 (0.89-1.00) | 200           | 0.87 (0.82-0.93) | 200               | 0.88 (0.80-0.97) |
| 300                        | 0.92 (0.84-1.01) | 300           | 0.88 (0.83-0.93) | 300               | 0.86 (0.77-0.97) |
| 400                        | 0.91 (0.82-1.01) | 400           | 0.90 (0.85-0.94) | 400               | 0.87 (0.77-0.98) |
| 500                        | 0.90 (0.81-1.01) | 500           | 0.92 (0.87-0.97) | 500               | 0.88 (0.77-1.00) |
| 600                        | 0.90 (0.81-1.00) | 600           | 0.94 (0.88-1.01) | 600               | 0.89 (0.78-1.02) |
| 700                        | 0.91 (0.82-1.00) |               |                  |                   |                  |
| 800                        | 0.91 (0.82-1.01) |               |                  |                   |                  |
| Pnonlinearity              | 0.13             | Pnonlinearity | <0.0001          | Pnonlinearity     | 0.004            |

**Supplemental Table 7.** Relative risks (95% confidence intervals) from nonlinear analysis of fruit and vegetable subtypes and type 2 diabetes

| Apples (n=2)  |                  | Apples and pears (n=4) |                  | Bananas (n=5) |                  | Berries (n=5) |                  | Blueberries (n=3) |                  |
|---------------|------------------|------------------------|------------------|---------------|------------------|---------------|------------------|-------------------|------------------|
| g/d           | RR (95% CI)      | g/d                    | RR (95% CI)      | g/d           | RR (95% CI)      | g/d           | RR (95% CI)      | g/d               | RR (95% CI)      |
| 0             | 1.00             | 0                      | 1.00             | 0             | 1.00             | 0             | 1.00             | 1                 | 1.00             |
| 50            | 0.91 (0.83-1.01) | 50                     | 0.90 (0.83-0.97) | 20            | 0.95 (0.91-1.00) | 10            | 0.93 (0.83-1.03) | 10                | 0.86 (0.81-0.91) |
| 100           | 0.86 (0.75-0.99) | 100                    | 0.87 (0.80-0.95) | 40            | 0.92 (0.85-1.00) | 20            | 0.89 (0.76-1.04) | 20                | 0.79 (0.72-0.86) |
| 150           | 0.83 (0.74-0.95) | 150                    | 0.87 (0.78-0.96) | 60            | 0.91 (0.83-1.01) | 30            | 0.89 (0.78-1.03) | 30                | 0.76 (0.69-0.83) |
| 200           | 0.82 (0.73-0.92) |                        |                  | 80            | 0.91 (0.81-1.03) | 40            | 0.92 (0.84-1.01) | 40                | 0.76 (0.68-0.84) |
| 250           | 0.81 (0.71-0.93) |                        |                  | 100           | 0.92 (0.80-1.06) | 50            | 0.97 (0.89-1.07) |                   |                  |
|               |                  |                        |                  | 120           | 0.92 (0.78-1.10) | 60            | 1.05 (0.86-1.27) |                   |                  |
|               |                  |                        |                  | 140           | 0.93 (0.77-1.13) | 70            | 1.13 (0.82-1.55) |                   |                  |
|               |                  |                        |                  |               |                  |               |                  |                   |                  |
| Pnonlinearity | 0.37             | Pnonlinearity          | 0.07             | Pnonlinearity | 0.04             | Pnonlinearity | 0.23             | Pnonlinearity     | 0.003            |



**Supplemental Table 8.** Relative risks (95% confidence intervals) from nonlinear analysis of fruit and vegetable subtypes and type 2 diabetes

| Cantaloupe (n=3) |                  | Citrus fruits (n=6) |                  | Oranges (n=4) |                  | Grapefruit (n=3) |                  | Grapes and raisins (n=4) |                  |
|------------------|------------------|---------------------|------------------|---------------|------------------|------------------|------------------|--------------------------|------------------|
| g/d              | RR (95% CI)      | g/d                 | RR (95% CI)      | g/d           | RR (95% CI)      | g/d              | RR (95% CI)      | g/d                      | RR (95% CI)      |
| 2                | 1.00             | 0                   | 1.00             | 0             | 1.00             | 2                | 1.00             | 0                        | 1.00             |
| 10               | 1.05 (1.01-1.09) | 50                  | 1.01 (0.97-1.06) | 20            | 0.99 (0.95-1.03) | 20               | 0.97 (0.92-1.02) | 10                       | 0.88 (0.83-0.94) |
| 20               | 1.09 (1.02-1.16) | 100                 | 1.02 (0.96-1.09) | 40            | 0.98 (0.93-1.04) | 40               | 0.95 (0.87-1.03) | 20                       | 0.83 (0.77-0.90) |
| 30               | 1.12 (1.03-1.21) | 150                 | 1.03 (0.96-1.11) | 60            | 0.99 (0.93-1.05) | 60               | 0.94 (0.86-1.02) | 30                       | 0.83 (0.76-0.90) |
| 40               | 1.14 (1.04-1.24) | 200                 | 1.04 (0.94-1.15) | 80            | 0.99 (0.94-1.05) | 80               | 0.93 (0.85-1.02) | 40                       | 0.84 (0.74-0.97) |
| 50               | 1.14 (1.05-1.25) | 250                 | 1.05 (0.92-1.21) | 100           | 1.00 (0.95-1.06) | 100              | 0.93 (0.84-1.03) |                          |                  |
| 60               | 1.14 (1.05-1.25) | 300                 | 1.06 (0.89-1.28) | 120           | 1.01 (0.96-1.08) |                  |                  |                          |                  |
| 70               | 1.14 (1.05-1.23) | 330                 | 1.07 (0.87-1.31) | 130           | 1.02 (0.96-1.09) |                  |                  |                          |                  |
| 80               | 1.13 (1.05-1.22) |                     |                  |               |                  |                  |                  |                          |                  |
| pnonlinearity    | 0.04             | pnonlinearity       | 0.94             | pnonlinearity | 0.41             | pnonlinearity    | 0.49             | pnonlinearity            | 0.01             |

**Supplemental Table 9.** Relative risks (95% confidence intervals) from nonlinear analysis of fruit and vegetable subtypes and type 2 diabetes

| Peaches, plums, apricots (n=3) |                  | Prunes (n=3)  |                  | Strawberries (n=3) |                  | Watermelon (n=2) |                  | Allium vegetables (n=3) |                  |
|--------------------------------|------------------|---------------|------------------|--------------------|------------------|------------------|------------------|-------------------------|------------------|
| g/d                            | RR (95% CI)      | g/d           | RR (95% CI)      | g/d                | RR (95% CI)      | g/d              | RR (95% CI)      | g/d                     | RR (95% CI)      |
| 1                              | 1.00             | 0             | 1.00             | 1                  | 1.00             | g/d              | RR (95% CI)      | 0                       | 1.00             |
| 10                             | 1.01 (0.97-1.05) | 10            | 0.90 (0.82-0.98) | 10                 | 1.00 (0.94-1.06) | 0                | 1.00             | 5                       | 0.81 (0.67-0.97) |
| 20                             | 1.01 (0.94-1.08) | 20            | 0.85 (0.74-0.97) | 20                 | 1.01 (0.91-1.12) | 50               | 0.94 (0.74-1.21) | 10                      | 0.72 (0.55-0.96) |
| 30                             | 1.00 (0.92-1.09) | 30            | 0.84 (0.74-0.96) | 30                 | 1.03 (0.90-1.19) | 100              | 0.92 (0.62-1.35) | 15                      | 0.71 (0.52-0.96) |
| 40                             | 0.98 (0.89-1.08) | 40            | 0.86 (0.77-0.97) | 40                 | 1.06 (0.90-1.26) | 150              | 0.92 (0.63-1.35) | 20                      | 0.72 (0.53-0.97) |
| 50                             | 0.96 (0.86-1.07) | 50            | 0.91 (0.79-1.05) | 50                 | 1.10 (0.90-1.36) | 200              | 0.96 (0.72-1.27) | 23                      | 0.72 (0.53-0.99) |
| 60                             | 0.93 (0.83-1.06) |               |                  | 60                 | 1.15 (0.89-1.49) | 220              | 0.97 (0.77-1.24) |                         |                  |
| 70                             | 0.91 (0.78-1.05) |               |                  |                    |                  |                  |                  |                         |                  |
| 74                             | 0.89 (0.76-1.05) |               |                  |                    |                  |                  |                  |                         |                  |
| pnonlinearity                  | 0.29             | pnonlinearity | 0.06             | pnonlinearity      | 0.39             | pnonlinearity    | 0.61             | pnonlinearity           | 0.045            |

**Supplemental Table 10.** Relative risks (95% confidence intervals) from nonlinear analysis of fruit and vegetable subtypes and type 2 diabetes

| Broccoli (n=4) |                  | Brussels sprouts (n=3) |                  | Cabbage (n=6) |                  | Cauliflower (n=3) |                  | Cruciferous vegetables (n=8) |                  |
|----------------|------------------|------------------------|------------------|---------------|------------------|-------------------|------------------|------------------------------|------------------|
| g/d            | RR (95% CI)      | g/d                    | RR (95% CI)      | g/d           | RR (95% CI)      | g/d               | RR (95% CI)      | g/d                          | RR (95% CI)      |
| 0              | 1.00             | 1                      | 1.00             | 0.8           | 1.00             | 1                 | 1.00             | 0                            | 1.00             |
| 20             | 1.01 (0.93-1.09) | 2                      | 1.02 (1.00-1.05) | 20            | 1.15 (1.03-1.28) | 2                 | 0.98 (0.95-1.01) | 20                           | 0.97 (0.90-1.05) |
| 40             | 1.03 (0.98-1.09) | 4                      | 1.05 (1.01-1.09) | 40            | 1.20 (1.01-1.42) | 4                 | 0.96 (0.90-1.02) | 40                           | 0.96 (0.84-1.09) |
| 60             | 1.07 (0.93-1.23) | 6                      | 1.07 (1.01-1.14) | 60            | 1.23 (0.97-1.56) | 6                 | 0.96 (0.89-1.03) | 60                           | 0.96 (0.82-1.12) |
| 80             | 1.11 (0.85-1.44) | 8                      | 1.10 (1.03-1.17) | 80            | 1.26 (0.92-1.73) | 8                 | 0.98 (0.91-1.05) | 80                           | 0.97 (0.82-1.13) |
| 100            | 1.14 (0.78-1.65) | 10                     | 1.12 (1.04-1.21) | 100           | 1.29 (0.87-1.92) | 10                | 1.01 (0.95-1.08) | 100                          | 0.99 (0.85-1.15) |
|                |                  | 12                     | 1.15 (1.06-1.25) | 110           | 1.30 (0.84-2.02) | 11                | 1.03 (0.97-1.09) | 120                          | 1.01 (0.87-1.17) |
|                |                  | 14                     | 1.18 (1.07-1.29) |               |                  |                   |                  | 140                          | 1.04 (0.89-1.20) |
|                |                  |                        |                  |               |                  |                   |                  |                              |                  |
| pnonlinearity  | 0.81             | pnonlinearity          | 0.98             | pnonlinearity | 0.04             | pnonlinearity     | 0.03             | pnonlinearity                | 0.32             |

**Supplemental Table 11.** Relative risks (95% confidence intervals) from nonlinear analysis of fruit and vegetable subtypes and type 2 diabetes

| Green leafy vegetables (n=8) |                  | Kale, mustard and chard greens (n=3) |                  | Mushrooms (n=2) |                  | Tomatoes (n=3) |                  | Yellow vegetables (n=4) |                  |
|------------------------------|------------------|--------------------------------------|------------------|-----------------|------------------|----------------|------------------|-------------------------|------------------|
| g/d                          | RR (95% CI)      | g/d                                  | RR (95% CI)      | g/d             | RR (95% CI)      | g/d            | RR (95% CI)      | g/d                     | RR (95% CI)      |
| 1.6                          | 1.00             | 1                                    | 1.00             | 0.45            | 1.00             | 0              | 1.00             | 0                       | 1.00             |
| 20                           | 0.92 (0.82-1.04) | 2                                    | 1.02 (0.99-1.05) | 5               | 1.07 (0.97-1.17) | 20             | 0.91 (0.68-1.23) | 20                      | 0.84 (0.66-1.07) |
| 40                           | 0.87 (0.70-1.07) | 4                                    | 1.04 (0.99-1.10) | 10              | 1.10 (0.96-1.27) | 40             | 0.88 (0.57-1.37) | 40                      | 0.77 (0.55-1.08) |
| 60                           | 0.85 (0.66-1.09) | 6                                    | 1.06 (0.98-1.13) | 15              | 1.11 (0.95-1.28) | 60             | 0.89 (0.56-1.40) | 60                      | 0.75 (0.53-1.05) |
| 80                           | 0.84 (0.65-1.10) | 8                                    | 1.07 (0.99-1.16) | 20              | 1.09 (0.95-1.25) | 80             | 0.92 (0.61-1.38) | 80                      | 0.75 (0.56-1.01) |
| 100                          | 0.85 (0.66-1.10) | 10                                   | 1.08 (0.99-1.18) | 25              | 1.06 (0.93-1.21) | 100            | 0.96 (0.68-1.34) | 100                     | 0.77 (0.59-1.00) |
| 120                          | 0.85 (0.66-1.11) | 12                                   | 1.09 (0.99-1.20) |                 |                  |                |                  |                         |                  |
| 140                          | 0.86 (0.66-1.12) | 13                                   | 1.10 (0.99-1.21) |                 |                  |                |                  |                         |                  |
| pnonlinearity                | 0.21             | pnonlinearity                        | 0.63             | pnonlinearity   | 0.22             | pnonlinearity  | 0.50             | pnonlinearity           | 0.27             |

**Supplemental Table 12.** Relative risks (95% confidence intervals) from nonlinear analysis of potatoes and type 2 diabetes

| Potatoes, boiled (n=2)    |                   | Potatoes, total (n=8)     |                  |
|---------------------------|-------------------|---------------------------|------------------|
| g/d                       | RR (95% CI)       | g/d                       | RR (95% CI)      |
| 2.4                       | 1.00              | 0                         | 1.00             |
| 20                        | 0.85 (0.58-1.25)  | 50                        | 0.98 (0.89-1.08) |
| 40                        | 0.74 (0.35-1.58)  | 100                       | 0.99 (0.84-1.16) |
| 60                        | 0.66 (0.21-2.08)  | 150                       | 1.02 (0.85-1.23) |
| 80                        | 0.60 (0.12-2.91)  | 200                       | 1.08 (0.89-1.31) |
| 100                       | 0.55 (0.07-4.39)  | 250                       | 1.15 (0.95-1.40) |
| 120                       | 0.52 (0.04-7.06)  | 300                       | 1.22 (1.00-1.50) |
| 140                       | 0.49 (0.02-12.02) | 325                       | 1.26 (1.02-1.55) |
| 160                       | 0.47 (0.01-21.39) |                           |                  |
|                           |                   |                           |                  |
| $p_{\text{nonlinearity}}$ | 0.71              | $p_{\text{nonlinearity}}$ | 0.15             |

**Supplemental Table 13.** Relative risks (95% confidence intervals) from nonlinear analysis of fruit juice and fruit drinks and type 2 diabetes

| Fruit juice (n=9)         |                  | 100% fruit juice (n=4)    |                  | Fruit drinks (n=6)        |                  |
|---------------------------|------------------|---------------------------|------------------|---------------------------|------------------|
| g/d                       | RR (95% CI)      | g/d                       | RR (95% CI)      | g/d                       | RR (95% CI)      |
| 0                         | 1.00             | 0                         | 1.00             | 0                         | 1.00             |
| 200                       | 1.02 (0.97-1.07) | 200                       | 0.99 (0.89-1.11) | 100                       | 1.07 (0.99-1.14) |
| 400                       | 1.03 (0.97-1.10) | 400                       | 1.06 (0.63-1.80) | 200                       | 1.14 (1.01-1.28) |
| 600                       | 1.05 (0.99-1.11) | 600                       | 1.14 (0.42-3.12) | 300                       | 1.21 (0.99-1.47) |
| 800                       | 1.06 (1.01-1.12) | 800                       | 1.22 (0.28-5.35) | 400                       | 1.28 (0.95-1.72) |
| 1000                      | 1.08 (1.02-1.13) |                           |                  | 500                       | 1.36 (0.90-2.04) |
| 1200                      | 1.09 (1.04-1.15) |                           |                  |                           |                  |
| 1400                      | 1.11 (1.05-1.16) |                           |                  |                           |                  |
| 1600                      | 1.12 (1.07-1.18) |                           |                  |                           |                  |
| 1800                      | 1.14 (1.08-1.20) |                           |                  |                           |                  |
| p <sub>nonlinearity</sub> | 0.87             | p <sub>nonlinearity</sub> | 0.74             | p <sub>nonlinearity</sub> | 0.93             |



**Supplemental Table 14.** Subgroup analyses of fruit and vegetable intake and type 2 diabetes, high vs. low and dose-response

|                            | Fruit and vegetables, high vs. low |                  |                    |                                    |                                    | Fruit and vegetables, dose-response (200 g/day) |                  |                    |                                    |                                    |      |      |
|----------------------------|------------------------------------|------------------|--------------------|------------------------------------|------------------------------------|-------------------------------------------------|------------------|--------------------|------------------------------------|------------------------------------|------|------|
|                            | <i>n</i>                           | RR (95% CI)      | I <sup>2</sup> (%) | <i>P</i> <sub>h</sub> <sup>a</sup> | <i>P</i> <sub>h</sub> <sup>b</sup> | <i>n</i>                                        | RR (95% CI)      | I <sup>2</sup> (%) | <i>P</i> <sub>h</sub> <sup>a</sup> | <i>P</i> <sub>h</sub> <sup>b</sup> |      |      |
| All studies                | 10                                 | 0.93 (0.89-0.98) | 0                  | 0.47                               |                                    | 7                                               | 0.98 (0.95-1.01) | 37.8               | 0.14                               |                                    |      |      |
| Duration of follow-up      |                                    |                  |                    |                                    |                                    |                                                 |                  |                    |                                    |                                    |      |      |
| <10 years follow-up        | 5                                  | 0.93 (0.88-0.99) | 0                  | 0.54                               | 0.54                               | 3                                               | 1.01 (0.97-1.05) | 0                  | 0.75                               | 0.14                               |      |      |
| ≥10 years follow-up        | 5                                  | 0.91 (0.83-1.01) | 27.9               | 0.24                               |                                    | 4                                               | 0.95 (0.91-1.00) | 46.3               | 0.13                               |                                    |      |      |
| Gender                     |                                    |                  |                    |                                    |                                    |                                                 |                  |                    |                                    |                                    |      |      |
| Men                        | 5                                  | 0.88 (0.74-1.04) | 0                  | 0.73                               | 0.92/                              | 1                                               | 0.89 (0.76-1.03) |                    |                                    | 0.46                               |      |      |
| Women                      | 5                                  | 0.95 (0.81-1.11) | 43.8               | 0.13                               | 0.30                               | 3                                               | 1.00 (0.97-1.04) | 0                  | 0.62                               |                                    |      |      |
| Men and women              | 3                                  | 0.92 (0.87-0.97) | 0                  | 0.37                               |                                    | 3                                               | 0.95 (0.90-1.01) | 45.8               | 0.16                               |                                    |      |      |
| Geographic location        |                                    |                  |                    |                                    |                                    |                                                 |                  |                    |                                    |                                    |      |      |
| Europe                     | 4                                  | 0.88 (0.80-0.98) | 0                  | 0.76                               | 0.68                               | 2                                               | 0.95 (0.91-1.00) | 3.2                | 0.31                               | 0.32                               |      |      |
| America                    | 4                                  | 1.00 (0.92-1.09) | 0                  | 0.41                               |                                    | 4                                               | 0.99 (0.94-1.04) | 54.2               | 0.09                               |                                    |      |      |
| Asia                       | 2                                  | 0.91 (0.86-0.97) | 0                  | 0.62                               |                                    | 1                                               | 1.00 (0.92-1.09) |                    |                                    |                                    |      |      |
| Australia                  |                                    |                  |                    |                                    |                                    |                                                 |                  |                    |                                    |                                    |      |      |
| Number of cases            |                                    |                  |                    |                                    |                                    |                                                 |                  |                    |                                    |                                    |      |      |
| Cases <1.000               | 3                                  | 0.84 (0.70-1.02) | 0                  | 0.65                               | 0.42                               | 2                                               | 0.96 (0.85-1.08) | 49.0               | 0.16                               | 0.95                               |      |      |
| Cases 1.000-<2.000         | 3                                  | 0.95 (0.81-1.11) | 14.1               | 0.31                               |                                    | 3                                               | 0.98 (0.90-1.06) | 69.5               | 0.04                               |                                    |      |      |
| Cases ≥2.000               | 4                                  | 0.94 (0.89-1.01) | 30.1               | 0.23                               |                                    | 2                                               | 0.98 (0.95-1.01) | 0                  | 0.36                               |                                    |      |      |
| Study quality              |                                    |                  |                    |                                    |                                    |                                                 |                  |                    |                                    |                                    |      |      |
| 0-3                        | 1                                  | 0.91 (0.62-1.33) |                    |                                    | 0.84                               | 0                                               |                  |                    |                                    | NC                                 |      |      |
| >3-6                       | 1                                  | 0.91 (0.66-1.25) |                    |                                    |                                    | 0                                               |                  |                    |                                    |                                    |      |      |
| >6-8                       | 8                                  | 0.94 (0.89-0.99) | 19.1               | 0.28                               |                                    | 7                                               | 0.98 (0.95-1.01) | 55.4               | 0.03                               |                                    |      |      |
| Adjustment for confounders |                                    |                  |                    |                                    |                                    |                                                 |                  |                    |                                    |                                    |      |      |
| Age                        | Yes                                | 10               | 0.93 (0.89-0.98)   | 0                                  | 0.47                               | NC                                              | Yes              | 7                  | 0.98 (0.95-1.01)                   | 55.4                               | 0.03 | NC   |
|                            | No                                 | 0                |                    |                                    |                                    |                                                 | No               | 0                  |                                    |                                    |      |      |
| Education                  | Yes                                | 6                | 0.91 (0.86-0.95)   | 0                                  | 0.56                               | 0.07                                            | Yes              | 4                  | 0.95 (0.89-1.02)                   | 59.3                               | 0.06 | 0.28 |
|                            | No                                 | 4                | 1.01 (0.92-1.10)   | 0                                  | 0.93                               |                                                 | No               | 3                  | 1.00 (0.96-1.03)                   | 0                                  | 0.95 |      |
| Ethnicity                  | Yes                                | 0                |                    |                                    |                                    | NC                                              | Yes              | 0                  |                                    |                                    |      | NC   |
|                            | No                                 | 10               | 0.93 (0.89-0.98)   | 0                                  | 0.47                               |                                                 | No               | 7                  | 0.98 (0.95-1.01)                   | 55.4                               | 0.03 |      |
| Family history             | Yes                                | 4                | 0.93 (0.86-1.02)   | 34.3                               | 0.21                               | 0.93                                            | Yes              | 4                  | 0.99 (0.96-1.02)                   | 0                                  | 0.50 | 0.46 |
|                            | No                                 | 6                | 0.94 (0.86-1.02)   | 0                                  | 0.54                               |                                                 | No               | 3                  | 0.96 (0.89-1.04)                   | 67.6                               | 0.05 |      |
| Body mass index            | Yes                                | 9                | 0.94 (0.89-0.98)   | 7.7                                | 0.37                               | 0.89                                            | Yes              | 7                  | 0.98 (0.95-1.01)                   | 55.4                               | 0.03 | NC   |
|                            | No                                 | 1                | 0.91 (0.62-1.33)   |                                    |                                    |                                                 | No               | 0                  |                                    |                                    |      |      |
| Waist circumference/WHR    | Yes                                | 3                | 0.91 (0.81-1.03)   | 34.6                               | 0.22                               | 0.40                                            | Yes              | 2                  | 0.97 (0.83-1.13)                   | 70                                 | 0.07 | 0.69 |
|                            | No                                 | 7                | 0.96 (0.89-1.02)   | 0                                  | 0.59                               |                                                 | No               | 5                  | 0.98 (0.94-1.01)                   | 32.5                               | 0.21 |      |
| Hypertension               | Yes                                | 3                | 0.96 (0.83-1.11)   | 18.4                               | 0.29                               | 0.64                                            | Yes              | 2                  | 1.00 (0.96-1.05)                   | 0                                  | 0.98 | 0.45 |
|                            | No                                 | 7                | 0.93 (0.88-0.97)   | 0                                  | 0.43                               |                                                 | No               | 5                  | 0.97 (0.92-1.01)                   | 52.8                               | 0.08 |      |
| Alcohol                    | Yes                                | 9                | 0.94 (0.89-0.98)   | 7.7                                | 0.37                               | 0.89                                            | Yes              | 7                  | 0.98 (0.95-1.01)                   | 55.4                               | 0.03 | NC   |
|                            | No                                 | 1                | 0.91 (0.62-1.33)   |                                    |                                    |                                                 | No               | 0                  |                                    |                                    |      |      |

|                   |     |   |                  |      |      |      |     |   |                  |      |      |      |
|-------------------|-----|---|------------------|------|------|------|-----|---|------------------|------|------|------|
| Smoking           | Yes | 9 | 0.94 (0.89-0.98) | 7.7  | 0.37 | 0.89 | Yes | 7 | 0.98 (0.95-1.01) | 55.4 | 0.03 | NC   |
|                   | No  | 1 | 0.91 (0.62-1.33) |      |      |      | No  | 0 |                  |      |      |      |
| Physical activity | Yes | 9 | 0.94 (0.89-0.98) | 7.7  | 0.37 | 0.89 | Yes | 7 | 0.98 (0.95-1.01) | 55.4 | 0.03 | NC   |
|                   | No  | 1 | 0.91 (0.62-1.33) |      |      |      | No  | 0 |                  |      |      |      |
| Meat              | Yes | 2 | 0.95 (0.86-1.05) | 60.9 | 0.11 | 0.76 | Yes | 1 | 0.99 (0.95-1.04) |      |      | 0.74 |
|                   | No  | 8 | 0.93 (0.86-1.00) | 0    | 0.53 |      | No  | 6 | 0.97 (0.93-1.02) | 46.5 | 0.10 |      |
| Soft drinks       | Yes | 1 | 1.01 (0.90-1.12) |      |      | 0.16 | Yes | 1 | 0.99 (0.95-1.04) |      |      | 0.74 |
|                   | No  | 9 | 0.92 (0.87-0.96) | 0    | 0.62 |      | No  | 6 | 0.97 (0.93-1.02) | 46.5 | 0.10 |      |
| Whole grains      | Yes | 2 | 0.96 (0.86-1.05) | 60.9 | 0.11 | 0.76 | Yes | 1 | 0.99 (0.95-1.04) |      |      | 0.74 |
|                   | No  | 8 | 0.93 (0.86-1.00) | 0    | 0.53 |      | No  | 6 | 0.97 (0.93-1.02) | 46.5 | 0.10 |      |
| Coffee            | Yes | 2 | 1.00 (0.91-1.11) | 0    | 0.79 | 0.15 | Yes | 2 | 0.99 (0.95-1.04) | 0    | 0.81 | 0.56 |
|                   | No  | 8 | 0.92 (0.87-0.96) | 0    | 0.54 |      | No  | 5 | 0.97 (0.92-1.02) | 55.1 | 0.06 |      |
| Energy intake     | Yes | 6 | 0.96 (0.90-1.04) | 14.4 | 0.32 | 0.21 | Yes | 6 | 0.99 (0.96-1.01) | 3.2  | 0.40 | 0.09 |
|                   | No  | 4 | 0.90 (0.85-0.96) | 0    | 0.84 |      | No  | 1 | 0.88 (0.80-0.98) |      |      |      |

*n* = number of studies

<sup>a</sup> *P* for heterogeneity within each subgroup

<sup>b</sup> *P* for heterogeneity between subgroups with meta-regression analysis

NC not calculatable

**Supplemental Table 15.** Subgroup analyses of fruit intake and type 2 diabetes, high vs. low and dose-response

|                            | Fruits, high vs. low |                  |                    |                                    |                                    | Fruits, dose-response (200 g/day) |                  |                    |                                    |                                    |         |      |
|----------------------------|----------------------|------------------|--------------------|------------------------------------|------------------------------------|-----------------------------------|------------------|--------------------|------------------------------------|------------------------------------|---------|------|
|                            | <i>n</i>             | RR (95% CI)      | I <sup>2</sup> (%) | <i>P</i> <sub>h</sub> <sup>a</sup> | <i>P</i> <sub>h</sub> <sup>b</sup> | <i>n</i>                          | RR (95% CI)      | I <sup>2</sup> (%) | <i>P</i> <sub>h</sub> <sup>a</sup> | <i>P</i> <sub>h</sub> <sup>b</sup> |         |      |
| All studies                | 20                   | 0.93 (0.90-0.97) | 9.3                | 0.34                               |                                    | 19                                | 0.96 (0.92-1.00) | 68.7               | <0.0001                            |                                    |         |      |
| Duration of follow-up      |                      |                  |                    |                                    |                                    |                                   |                  |                    |                                    |                                    |         |      |
| <10 years follow-up        | 9                    | 0.96 (0.89-1.04) | 33.4               | 0.15                               | 0.64                               | 8                                 | 0.98 (0.87-1.09) | 84.7               | <0.0001                            | 0.50                               |         |      |
| ≥10 years follow-up        | 11                   | 0.94 (0.91-0.97) | 0                  | 0.58                               |                                    | 11                                | 0.97 (0.95-0.99) | 4.3                | 0.40                               |                                    |         |      |
| Gender                     |                      |                  |                    |                                    |                                    |                                   |                  |                    |                                    |                                    |         |      |
| Men                        | 5                    | 1.01 (0.86-1.18) | 44.7               | 0.12                               | 0.10/                              | 4                                 | 0.99 (0.90-1.10) | 41.5               | 0.16                               | 0.47/                              |         |      |
| Women                      | 9                    | 0.96 (0.91-1.02) | 0                  | 0.48                               | 0.73                               | 9                                 | 0.98 (0.92-1.04) | 61.3               | 0.008                              | 0.80                               |         |      |
| Men and women              | 9                    | 0.91 (0.88-0.95) | 12.0               | 0.34                               |                                    | 8                                 | 0.91 (0.82-1.01) | 82.6               | <0.0001                            |                                    |         |      |
| Geographic location        |                      |                  |                    |                                    |                                    |                                   |                  |                    |                                    |                                    |         |      |
| Europe                     | 5                    | 0.94 (0.84-1.04) | 0                  | 0.60                               | 0.52                               | 4                                 | 0.95 (0.89-1.03) | 0                  | 0.62                               | 0.41                               |         |      |
| America                    | 7                    | 0.94 (0.91-0.98) | 0                  | 0.55                               |                                    | 7                                 | 0.98 (0.95-1.02) | 21.7               | 0.26                               |                                    |         |      |
| Asia                       | 5                    | 0.97 (0.86-1.08) | 58.2               | 0.05                               |                                    | 5                                 | 0.94 (0.82-1.08) | 89.7               | <0.0001                            |                                    |         |      |
| Australia                  | 3                    | 0.87 (0.75-1.01) | 0                  | 0.44                               |                                    | 3                                 | 0.90 (0.81-1.01) | 0                  | 0.51                               |                                    |         |      |
| Number of cases            |                      |                  |                    |                                    |                                    |                                   |                  |                    |                                    |                                    |         |      |
| Cases <1.000               | 6                    | 0.94 (0.83-1.07) | 0                  | 0.68                               | 0.69                               | 5                                 | 0.93 (0.84-1.03) | 0                  | 0.73                               | 0.96                               |         |      |
| Cases 1.000-<2.000         | 4                    | 0.98 (0.84-1.16) | 0                  | 0.69                               |                                    | 4                                 | 1.00 (0.89-1.12) | 47.6               | 0.13                               |                                    |         |      |
| Cases ≥2.000               | 10                   | 0.93 (0.90-0.97) | 19.4               | 0.26                               |                                    | 10                                | 0.95 (0.90-1.00) | 81.4               | <0.0001                            |                                    |         |      |
| Study quality              |                      |                  |                    |                                    |                                    |                                   |                  |                    |                                    |                                    |         |      |
| 0-3                        | 0                    |                  |                    |                                    | 0.18                               | 0                                 |                  |                    |                                    | 0.18                               |         |      |
| >3-6                       | 5                    | 0.96 (0.92-1.00) | 0                  | 0.57                               |                                    | 5                                 | 1.00 (0.95-1.06) | 43.3               | 0.15                               |                                    |         |      |
| >6-8                       | 15                   | 0.91 (0.88-0.95) | 3.9                | 0.41                               |                                    | 14                                | 0.94 (0.88-0.99) | 65.1               | <0.0001                            |                                    |         |      |
| Adjustment for confounders |                      |                  |                    |                                    |                                    |                                   |                  |                    |                                    |                                    |         |      |
| Age                        | Yes                  | 19               | 0.94 (0.91-0.97)   | 10.8                               | 0.32                               | 0.39                              | Yes              | 18                 | 0.96 (0.92-1.00)                   | 69.9                               | <0.0001 | 0.40 |
|                            | No                   | 1                | 0.75 (0.46-1.22)   |                                    |                                    |                                   | No               | 1                  | 0.79 (0.53-1.19)                   |                                    |         |      |
| Education                  | Yes                  | 13               | 0.95 (0.90-1.00)   | 34.2                               | 0.11                               | 0.38                              | Yes              | 12                 | 0.96 (0.91-1.02)                   | 78.2                               | <0.0001 | 0.54 |
|                            | No                   | 7                | 0.91 (0.86-0.97)   | 0                                  | 0.91                               |                                   | No               | 7                  | 0.94 (0.89-1.00)                   | 0                                  | 0.52    |      |
| Ethnicity                  | Yes                  | 5                | 0.90 (0.84-0.97)   | 0                                  | 0.33                               | 0.29                              | Yes              | 5                  | 0.95 (0.90-1.01)                   | 18.0                               | 0.30    | 0.69 |
|                            | No                   | 15               | 0.95 (0.91-1.00)   | 29.3                               | 0.14                               |                                   | No               | 14                 | 0.96 (0.91-1.02)                   | 74.9                               | <0.0001 |      |
| Family history             | Yes                  | 11               | 0.90 (0.86-0.94)   | 0                                  | 0.94                               | 0.03                              | Yes              | 11                 | 0.91 (0.85-0.98)                   | 56.0                               | 0.01    | 0.04 |
|                            | No                   | 9                | 0.98 (0.92-1.04)   | 26.7                               | 0.21                               |                                   | No               | 8                  | 1.00 (0.96-1.04)                   | 41.6                               | 0.10    |      |
| Body mass index            | Yes                  | 18               | 0.93 (0.90-0.97)   | 13.8                               | 0.29                               | 0.96                              | Yes              | 18                 | 0.96 (0.92-1.00)                   | 71.6                               | <0.0001 | 0.57 |
|                            | No                   | 2                | 0.93 (0.69-1.26)   | 17.7                               | 0.27                               |                                   | No               | 2                  | 0.89 (0.71-1.12)                   | 0                                  | 0.49    |      |
| Waist circumference/WHR    | Yes                  | 5                | 1.04 (0.94-1.16)   | 0                                  | 0.70                               | 0.04                              | Yes              | 6                  | 1.03 (0.96-1.10)                   | 12.7                               | 0.33    | 0.16 |
|                            | No                   | 15               | 0.92 (0.90-0.95)   | 0                                  | 0.51                               |                                   | No               | 13                 | 0.94 (0.89-0.98)                   | 74.9                               | <0.0001 |      |
| Hypertension               | Yes                  | 4                | 1.01 (0.91-1.11)   | 0                                  | 0.91                               | 0.14                              | Yes              | 5                  | 1.03 (0.98-1.09)                   | 0                                  | 0.50    | 0.18 |
|                            | No                   | 16               | 0.93 (0.89-0.96)   | 15.3                               | 0.28                               |                                   | No               | 14                 | 0.94 (0.89-0.99)                   | 74.1                               | <0.0001 |      |
| Alcohol                    | Yes                  | 12               | 0.96 (0.91-1.01)   | 31.5                               | 0.14                               | 0.13                              | Yes              | 11                 | 0.97 (0.92-1.03)                   | 78.6                               | <0.0001 | 0.24 |
|                            | No                   | 8                | 0.89 (0.84-0.95)   | 0                                  | 0.91                               |                                   | No               | 8                  | 0.93 (0.87-0.99)                   | 19.4                               | 0.28    |      |

|                   |     |    |                  |      |      |      |     |    |                  |      |         |         |
|-------------------|-----|----|------------------|------|------|------|-----|----|------------------|------|---------|---------|
| Smoking           | Yes | 17 | 0.94 (0.91-0.97) | 11.3 | 0.32 | 0.12 | Yes | 16 | 0.96 (0.92-1.01) | 71.7 | <0.0001 | 0.23    |
|                   | No  | 3  | 0.82 (0.70-0.96) | 0    | 0.92 |      | No  | 3  | 0.88 (0.79-0.99) | 0    | 0.46    |         |
| Physical activity | Yes | 18 | 0.94 (0.91-0.97) | 12.6 | 0.30 | 0.25 | Yes | 17 | 0.96 (0.92-1.00) | 71.0 | <0.0001 | 0.23    |
|                   | No  | 2  | 0.80 (0.62-1.03) | 0    | 0.76 |      | No  | 2  | 0.80 (0.62-1.04) | 0    | 0.94    |         |
| Meat              | Yes | 3  | 0.91 (0.81-1.03) | 61.4 | 0.08 | 0.06 | Yes | 3  | 0.88 (0.70-1.12) | 94.3 | <0.0001 | 0.21    |
|                   | No  | 17 | 0.95 (0.92-0.98) | 0    | 0.76 |      | No  | 16 | 0.98 (0.97-1.00) | 0    | 0.66    |         |
| Soft drinks       | Yes | 1  | 1.08 (0.91-1.28) |      |      | 0.12 | Yes | 1  | 0.98 (0.90-1.06) |      |         | 0.79    |
|                   | No  | 19 | 0.93 (0.90-0.95) | 0    | 0.46 |      | No  | 18 | 0.95 (0.91-1.00) | 70.4 | <0.0001 |         |
| Whole grains      | Yes | 1  | 0.82 (0.68-0.99) |      |      | 0.20 | Yes | 1  | 0.81 (0.65-1.00) |      |         | 0.21    |
|                   | No  | 19 | 0.94 (0.91-0.97) | 5.8  | 0.39 |      | No  | 18 | 0.96 (0.92-1.00) | 68.7 | <0.0001 |         |
| Coffee            | Yes | 2  | 1.04 (0.91-1.19) | 0    | 0.49 | 0.14 | Yes | 2  | 0.99 (0.93-1.06) | 0    | 0.57    | 0.51    |
|                   | No  | 18 | 0.93 (0.90-0.96) | 3.9  | 0.41 |      | No  | 17 | 0.95 (0.90-1.00) | 72.0 | <0.0001 |         |
| Energy intake     | Yes | 17 | 0.95 (0.92-0.98) | 0    | 0.58 | 0.05 | Yes | 17 | 0.98 (0.96-1.01) | 17.1 | 0.25    | <0.0001 |
|                   | No  | 3  | 0.89 (0.82-0.97) | 7.0  | 0.34 |      | No  | 2  | 0.79 (0.73-0.84) | 0    | 0.97    |         |

*n* = number of studies

<sup>a</sup> *P* for heterogeneity within each subgroup

<sup>b</sup> *P* for heterogeneity between subgroups with meta-regression analysis

NC not calculatable

**Supplemental Table 16.** Subgroup analyses of vegetable intake and type 2 diabetes, high vs. low and dose-response

|                            | Vegetables, high vs. low |                  |                    |                                    |                                    | Vegetables, dose-response (200 g/day) |                  |                    |                                    |                                    |      |      |
|----------------------------|--------------------------|------------------|--------------------|------------------------------------|------------------------------------|---------------------------------------|------------------|--------------------|------------------------------------|------------------------------------|------|------|
|                            | <i>n</i>                 | RR (95% CI)      | I <sup>2</sup> (%) | <i>P</i> <sub>h</sub> <sup>a</sup> | <i>P</i> <sub>h</sub> <sup>b</sup> | <i>n</i>                              | RR (95% CI)      | I <sup>2</sup> (%) | <i>P</i> <sub>h</sub> <sup>a</sup> | <i>P</i> <sub>h</sub> <sup>b</sup> |      |      |
| All studies                | 17                       | 0.95 (0.88-1.02) | 60.4               | 0.001                              |                                    | 15                                    | 0.97 (0.94-1.01) | 39.2               | 0.06                               |                                    |      |      |
| Duration of follow-up      |                          |                  |                    |                                    |                                    |                                       |                  |                    |                                    |                                    |      |      |
| <10 years follow-up        | 8                        | 0.92 (0.80-1.05) | 65.3               | 0.005                              | 0.59                               | 6                                     | 0.94 (0.85-1.04) | 62.3               | 0.02                               | 0.48                               |      |      |
| ≥10 years follow-up        | 9                        | 0.97 (0.89-1.05) | 59.8               | 0.01                               |                                    | 9                                     | 1.00 (0.98-1.02) | 0                  | 0.51                               |                                    |      |      |
| Gender                     |                          |                  |                    |                                    |                                    |                                       |                  |                    |                                    |                                    |      |      |
| Men                        | 3                        | 0.78 (0.64-0.94) | 0                  | 0.61                               | 0.35/                              | 2                                     | 0.85 (0.71-1.01) | 0                  | 0.76                               | 0.52/                              |      |      |
| Women                      | 8                        | 0.97 (0.87-1.09) | 63.2               | 0.008                              | 0.11                               | 6                                     | 0.98 (0.90-1.05) | 66.1               | 0.01                               | 0.26                               |      |      |
| Men and women              | 8                        | 0.95 (0.87-1.05) | 55.8               | 0.03                               |                                    | 8                                     | 1.00 (0.97-1.02) | 0                  | 0.63                               |                                    |      |      |
| Geographic location        |                          |                  |                    |                                    |                                    |                                       |                  |                    |                                    |                                    |      |      |
| Europe                     | 5                        | 0.87 (0.73-1.03) | 48.3               | 0.10                               | 0.55                               | 4                                     | 0.95 (0.88-1.02) | 0                  | 0.12                               | 0.32                               |      |      |
| America                    | 5                        | 1.02 (0.93-1.11) | 61.3               | 0.04                               |                                    | 4                                     | 1.01 (0.99-1.03) | 0                  | 0.76                               |                                    |      |      |
| Asia                       | 4                        | 0.89 (0.70-1.13) | 83.6               | <0.0001                            |                                    | 4                                     | 0.91 (0.81-1.02) | 48.9               | 0.12                               |                                    |      |      |
| Australia                  | 3                        | 0.94 (0.79-1.12) | 0                  | 0.46                               |                                    | 3                                     | 0.91 (0.78-1.05) | 0                  | 0.59                               |                                    |      |      |
| Number of cases            |                          |                  |                    |                                    |                                    |                                       |                  |                    |                                    |                                    |      |      |
| Cases <1.000               | 7                        | 0.87 (0.74-1.03) | 48.8               | 0.07                               | 0.27                               | 7                                     | 0.88 (0.80-0.98) | 0                  | 0.93                               | 0.05                               |      |      |
| Cases 1.000-<2.000         | 4                        | 1.00 (0.85-1.19) | 35.7               | 0.20                               |                                    | 4                                     | 0.96 (0.87-1.06) | 74.7               | 0.008                              |                                    |      |      |
| Cases ≥2.000               | 6                        | 0.96 (0.87-1.05) | 78.8               | <0.0001                            |                                    | 4                                     | 1.00 (0.98-1.03) | 0                  | 0.63                               |                                    |      |      |
| Study quality              |                          |                  |                    |                                    |                                    |                                       |                  |                    |                                    |                                    |      |      |
| 0-3                        | 0                        |                  |                    |                                    | 0.05                               | 0                                     |                  |                    |                                    | 0.46                               |      |      |
| >3-6                       | 5                        | 0.85 (0.71-1.02) | 69.5               | 0.01                               |                                    | 4                                     | 0.93 (0.83-1.05) | 77.8               | 0.004                              |                                    |      |      |
| >6-8                       | 12                       | 1.00 (0.95-1.06) | 25.2               | 0.20                               |                                    | 11                                    | 1.00 (0.96-1.03) | 0                  | 0.49                               |                                    |      |      |
| Adjustment for confounders |                          |                  |                    |                                    |                                    |                                       |                  |                    |                                    |                                    |      |      |
| Age                        | Yes                      | 16               | 0.95 (0.88-1.02)   | 62.8                               | <0.0001                            | 0.82                                  | Yes              | 14                 | 0.97 (0.94-1.01)                   | 43.2                               | 0.04 | 0.77 |
|                            | No                       | 1                | 0.89 (0.57-1.39)   |                                    |                                    |                                       | No               | 1                  | 0.89 (0.53-1.51)                   |                                    |      |      |
| Education                  | Yes                      | 12               | 0.94 (0.86-1.03)   | 67.6                               | <0.0001                            | 0.89                                  | Yes              | 10                 | 0.96 (0.91-1.01)                   | 50.8                               | 0.03 | 0.51 |
|                            | No                       | 5                | 0.98 (0.88-1.08)   | 23.6                               | 0.26                               |                                       | No               | 5                  | 1.01 (0.96-1.06)                   | 3.8                                | 0.39 |      |
| Ethnicity                  | Yes                      | 1                | 0.88 (0.60-1.29)   |                                    |                                    | 0.76                                  | Yes              | 1                  | 0.59 (0.19-1.68)                   |                                    |      | 0.38 |
|                            | No                       | 16               | 0.95 (0.88-1.02)   | 62.7                               | <0.0001                            |                                       | No               | 14                 | 0.97 (0.94-1.01)                   | 41.3                               | 0.05 |      |
| Family history             | Yes                      | 9                | 0.98 (0.89-1.07)   | 28.6                               | 0.19                               | 0.80                                  | Yes              | 8                  | 0.98 (0.92-1.04)                   | 20.5                               | 0.27 | 0.85 |
|                            | No                       | 8                | 0.94 (0.85-1.04)   | 73.6                               | <0.0001                            |                                       | No               | 7                  | 0.97 (0.92-1.03)                   | 57.8                               | 0.03 |      |
| Body mass index            | Yes                      | 15               | 0.95 (0.89-1.02)   | 64.0                               | <0.0001                            | 0.63                                  | Yes              | 13                 | 0.98 (0.94-1.02)                   | 43.8                               | 0.05 | 0.35 |
|                            | No                       | 2                | 0.78 (0.39-1.58)   | 14.7                               | 0.28                               |                                       | No               | 2                  | 0.88 (0.72-1.06)                   | 0                                  | 0.94 |      |
| Waist circumference/WHR    | Yes                      | 6                | 0.90 (0.74-1.10)   | 73.7                               | 0.002                              | 0.57                                  | Yes              | 5                  | 0.90 (0.78-1.02)                   | 61.0                               | 0.04 | 0.04 |
|                            | No                       | 11               | 0.97 (0.90-1.04)   | 52.3                               | 0.02                               |                                       | No               | 10                 | 1.00 (0.98-1.02)                   | 0                                  | 0.80 |      |
| Hypertension               | Yes                      | 5                | 0.91 (0.74-1.11)   | 80.0                               | 0.001                              | 0.74                                  | Yes              | 5                  | 0.93 (0.85-1.02)                   | 65.0                               | 0.02 | 0.20 |
|                            | No                       | 12               | 0.96 (0.89-1.03)   | 45.0                               | 0.05                               |                                       | No               | 10                 | 1.00 (0.98-1.02)                   | 0                                  | 0.62 |      |
| Alcohol                    | Yes                      | 12               | 0.94 (0.87-1.02)   | 66.4                               | 0.001                              | 0.85                                  | Yes              | 11                 | 0.98 (0.94-1.02)                   | 49.6                               | 0.03 | 0.29 |
|                            | No                       | 5                | 0.96 (0.81-1.13)   | 40.5                               | 0.15                               |                                       | No               | 4                  | 0.90 (0.78-1.03)                   | 0                                  | 0.80 |      |

|                   |     |    |                  |      |         |      |     |    |                  |      |       |      |
|-------------------|-----|----|------------------|------|---------|------|-----|----|------------------|------|-------|------|
| Smoking           | Yes | 14 | 0.95 (0.88-1.02) | 67.6 | <0.0001 | 0.89 | Yes | 12 | 0.97 (0.93-1.01) | 49.8 | 0.03  | 0.75 |
|                   | No  | 3  | 0.94 (0.80-1.11) | 0    | 0.88    |      | No  | 3  | 0.94 (0.77-1.15) | 0    | 0.66  |      |
| Physical activity | Yes | 15 | 0.96 (0.89-1.03) | 63.3 | <0.0001 | 0.32 | Yes | 13 | 0.97 (0.94-1.01) | 44.1 | 0.04  | 0.33 |
|                   | No  | 2  | 0.80 (0.63-1.03) | 0    | 0.60    |      | No  | 2  | 0.81 (0.58-1.13) | 0    | 0.66  |      |
| Meat              | Yes | 4  | 0.95 (0.81-1.12) | 83.9 | <0.0001 | 0.80 | Yes | 4  | 0.96 (0.85-1.08) | 77.5 | 0.004 | 0.87 |
|                   | No  | 13 | 0.94 (0.88-1.01) | 35.9 | 0.10    |      | No  | 11 | 1.00 (0.97-1.02) | 0    | 0.51  |      |
| Soft drinks       | Yes | 2  | 1.07 (1.00-1.14) | 0    | 0.69    | 0.11 | Yes | 2  | 1.03 (0.97-1.09) | 0    | 0.87  | 0.19 |
|                   | No  | 15 | 0.92 (0.85-0.99) | 50.3 | 0.01    |      | No  | 13 | 0.96 (0.91-1.00) | 43.2 | 0.05  |      |
| Whole grains      | Yes | 3  | 1.06 (0.99-1.13) | 0    | 0.64    | 0.12 | Yes | 3  | 1.03 (0.97-1.09) | 0    | 0.85  | 0.22 |
|                   | No  | 14 | 0.91 (0.84-0.99) | 53.5 | 0.009   |      | No  | 12 | 0.95 (0.91-1.00) | 47.8 | 0.03  |      |
| Coffee            | Yes | 3  | 1.05 (0.97-1.13) | 13.4 | 0.32    | 0.22 | Yes | 3  | 1.01 (0.95-1.08) | 13.5 | 0.32  | 0.40 |
|                   | No  | 14 | 0.92 (0.85-1.00) | 53.6 | 0.009   |      | No  | 12 | 0.96 (0.91-1.01) | 44.8 | 0.05  |      |
| Energy intake     | Yes | 15 | 0.96 (0.89-1.03) | 62.8 | 0.001   | 0.26 | Yes | 14 | 0.97 (0.94-1.01) | 43.2 | 0.04  | 0.77 |
|                   | No  | 2  | 0.79 (0.62-1.01) | 0    | 0.53    |      | No  | 1  | 0.89 (0.53-1.51) | 0    | 0     |      |

*n* = number of studies

<sup>a</sup> *P* for heterogeneity within each subgroup

<sup>b</sup> *P* for heterogeneity between subgroups with meta-regression analysis

NC not calculatable



**Supplemental Table 17.** Subgroup analyses of cruciferous vegetable intake and type 2 diabetes, dose-response

|                            |                         | Cruciferous vegetables, 100 g/day |                  |                    |                                    |                                    |       |
|----------------------------|-------------------------|-----------------------------------|------------------|--------------------|------------------------------------|------------------------------------|-------|
|                            |                         | <i>n</i>                          | RR (95% CI)      | I <sup>2</sup> (%) | <i>P</i> <sub>h</sub> <sup>a</sup> | <i>P</i> <sub>h</sub> <sup>b</sup> |       |
| All studies                |                         | 8                                 | 0.96 (0.84-1.09) | 80.9               | <0.0001                            |                                    |       |
| Duration of follow-up      |                         |                                   |                  |                    |                                    |                                    |       |
|                            | <10 years follow-up     | 3                                 | 0.75 (0.51-1.11) | 82.8               | 0.003                              | 0.20                               |       |
|                            | ≥10 years follow-up     | 5                                 | 1.07 (0.97-1.18) | 67.5               | 0.02                               |                                    |       |
| Gender                     |                         |                                   |                  |                    |                                    |                                    |       |
|                            | Men                     | 2                                 | 0.85 (0.42-1.73) | 79.6               | 0.03                               | 0.99                               |       |
|                            | Women                   | 4                                 | 0.94 (0.76-1.16) | 87.4               | 0                                  |                                    |       |
|                            | Men and women           | 2                                 | 0.91 (0.81-1.03) | 0                  | 0.79                               |                                    |       |
| Geographic location        |                         |                                   |                  |                    |                                    |                                    |       |
|                            | Europe                  | 1                                 | 0.55 (0.29-1.04) |                    |                                    | 0.53                               |       |
|                            | America                 | 4                                 | 1.13 (1.07-1.19) | 0                  | 0.53                               |                                    |       |
|                            | Asia                    | 3                                 | 0.75 (0.54-1.05) | 83.4               | 0.002                              |                                    |       |
|                            | Australia               |                                   |                  |                    |                                    |                                    |       |
| Number of cases            |                         |                                   |                  |                    |                                    |                                    |       |
|                            | Cases <1.000            | 2                                 | 0.77 (0.50-1.19) | 47.1               | 0.17                               | 0.14                               |       |
|                            | Cases 1.000-<2.000      | 2                                 | 0.68 (0.33-1.39) | 90.8               | 0.001                              |                                    |       |
|                            | Cases ≥2.000            | 4                                 | 1.09 (1.00-1.19) | 61.1               | 0.05                               |                                    |       |
| Study quality              |                         |                                   |                  |                    |                                    |                                    |       |
|                            | 0-3                     | 0                                 |                  |                    |                                    | 0.02                               |       |
|                            | >3-6                    | 1                                 | 0.47 (0.33-0.67) |                    |                                    |                                    |       |
|                            | >6-8                    | 7                                 | 1.04 (0.95-1.14) | 62.4               | 0.01                               |                                    |       |
| Adjustment for confounders |                         |                                   |                  |                    |                                    |                                    |       |
|                            | Age                     | Yes                               | 8                | 0.96 (0.84-1.09)   | 80.9                               | <0.0001                            | NC    |
|                            |                         | No                                | 0                |                    |                                    |                                    |       |
|                            | Education               | Yes                               | 3                | 0.64 (0.38-1.08)   | 85.2                               | 0.001                              | 0.05  |
|                            |                         | No                                | 5                | 1.10 (1.03-1.18)   | 29.5                               | 0.23                               |       |
|                            | Ethnicity               | Yes                               | 3                | 1.13 (1.07-1.20)   | 0                                  | 0.75                               | 0.03  |
|                            |                         | No                                | 5                | 0.78 (0.62-0.99)   | 73.1                               | 0.005                              |       |
|                            | Family history          | Yes                               | 6                | 1.08 (0.99-1.17)   | 51.3                               | 0.07                               | 0.15  |
|                            |                         | No                                | 2                | 0.67 (0.34-1.30)   | 91.6                               | 0.001                              |       |
|                            | Body mass index         | Yes                               | 8                | 0.96 (0.84-1.09)   | 80.9                               | <0.0001                            | NC    |
|                            |                         | No                                | 0                |                    |                                    |                                    |       |
|                            | Waist circumference/WHR | Yes                               | 2                | 0.48 (0.35-0.66)   | 0                                  | 0.68                               | 0.005 |
|                            |                         | No                                | 6                | 1.06 (0.98-1.15)   | 57.1                               | 0.04                               |       |
|                            | Hypertension            | Yes                               | 7                | 0.98 (0.86-1.11)   | 81.6                               | <0.0001                            | 0.38  |
|                            |                         | No                                | 1                | 0.55 (0.29-1.04)   |                                    |                                    |       |
|                            | Alcohol                 | Yes                               | 8                | 0.96 (0.84-1.09)   | 80.9                               | <0.0001                            | NC    |
|                            |                         | No                                | 0                |                    |                                    |                                    |       |
|                            | Smoking                 | Yes                               | 8                | 0.96 (0.84-1.09)   | 80.9                               | <0.0001                            | NC    |
|                            |                         | No                                | 0                |                    |                                    |                                    |       |
|                            | Physical activity       | Yes                               | 8                | 0.96 (0.84-1.09)   | 80.9                               | <0.0001                            | NC    |
|                            |                         | No                                | 0                |                    |                                    |                                    |       |
|                            | Meat consumption        | Yes                               | 2                | 0.67 (0.34-1.30)   | 91.6                               | 0.001                              | 0.15  |
|                            |                         | No                                | 6                | 1.08 (0.99-1.17)   | 51.3                               | 0.07                               |       |
|                            | Soft drink              | Yes                               | 1                | 0.92 (0.80-1.06)   |                                    |                                    | 0.96  |
|                            |                         | No                                | 7                | 0.96 (0.83-1.11)   | 81.2                               | <0.0001                            |       |
|                            | Whole grain             | Yes                               | 1                | 0.92 (0.80-1.06)   |                                    |                                    | 0.96  |
|                            |                         | No                                | 7                | 0.96 (0.83-1.11)   | 81.2                               | <0.0001                            |       |
|                            | Coffee                  | Yes                               | 2                | 0.91 (0.81-1.03)   | 0                                  | 0.79                               | 0.99  |
|                            |                         | No                                | 6                | 0.97 (0.84-1.14)   | 82.8                               | <0.0001                            |       |
|                            | Energy intake           | Yes                               | 8                | 0.96 (0.84-1.09)   | 80.9                               | <0.0001                            | NC    |
|                            |                         | No                                | 0                |                    |                                    |                                    |       |

*n* = number of studies<sup>a</sup> *P* for heterogeneity within each subgroup<sup>b</sup> *P* for heterogeneity between subgroups with meta-regression analysis

NC not calculatable

**Supplemental Table 18.** Subgroup analyses of green leafy vegetable intake and type 2 diabetes, dose-response

|                            |                         | Green leafy vegetables, 100 g/day |                  |                    |                                    |                                    |      |
|----------------------------|-------------------------|-----------------------------------|------------------|--------------------|------------------------------------|------------------------------------|------|
|                            |                         | <i>n</i>                          | RR (95% CI)      | I <sup>2</sup> (%) | <i>P</i> <sub>h</sub> <sup>a</sup> | <i>P</i> <sub>h</sub> <sup>b</sup> |      |
| All studies                |                         | 8                                 | 0.96 (0.91-1.01) | 75.0               | <0.0001                            |                                    |      |
| Duration of follow-up      |                         |                                   |                  |                    |                                    |                                    |      |
|                            | <10 years follow-up     | 3                                 | 0.86 (0.76-0.96) | 19.0               | 0.29                               | 0.18                               |      |
|                            | ≥10 years follow-up     | 5                                 | 0.98 (0.93-1.03) | 78.7               | 0.001                              |                                    |      |
| Gender                     |                         |                                   |                  |                    |                                    |                                    |      |
|                            | Men                     | 0                                 |                  |                    |                                    |                                    |      |
|                            | Women                   | 3                                 | 0.87 (0.81-0.94) | 0                  | 0.41                               | 0.06                               |      |
|                            | Men and women           | 5                                 | 1.00 (0.94-1.05) | 76.2               | 0.002                              |                                    |      |
| Geographic location        |                         |                                   |                  |                    |                                    |                                    |      |
|                            | Europe                  | 2                                 | 0.87 (0.57-1.32) | 73.6               | 0.05                               | 0.66                               |      |
|                            | America                 | 3                                 | 0.95 (0.88-1.01) | 48.5               | 0.14                               |                                    |      |
|                            | Asia                    | 3                                 | 0.90 (0.70-1.15) | 78.2               | 0.01                               |                                    |      |
|                            | Australia               | 0                                 |                  |                    |                                    |                                    |      |
| Number of cases            |                         |                                   |                  |                    |                                    |                                    |      |
|                            | Cases <1.000            | 1                                 | 0.70 (0.44-1.12) |                    |                                    | 0.57                               |      |
|                            | Cases 1.000-<2.000      | 3                                 | 0.93 (0.80-1.08) | 83.2               | 0.003                              |                                    |      |
|                            | Cases ≥2.000            | 4                                 | 0.95 (0.86-1.05) | 66.3               | 0.03                               |                                    |      |
| Study quality              |                         |                                   |                  |                    |                                    |                                    |      |
|                            | 0-3                     | 0                                 |                  |                    |                                    | 0.74                               |      |
|                            | >3-6                    | 3                                 | 0.97 (0.92-1.03) | 88.2               | <0.0001                            |                                    |      |
|                            | >6-8                    | 5                                 | 0.91 (0.80-1.05) | 55.9               | 0.06                               |                                    |      |
| Adjustment for confounders |                         |                                   |                  |                    |                                    |                                    |      |
|                            | Age                     | Yes                               | 8                | 0.96 (0.91-1.01)   | 75.0                               | <0.0001                            | NC   |
|                            |                         | No                                | 0                |                    |                                    |                                    |      |
|                            | Education               | Yes                               | 5                | 0.98 (0.92-1.03)   | 81.9                               | <0.0001                            | 0.44 |
|                            |                         | No                                | 3                | 0.89 (0.82-0.97)   | 0                                  | 0.47                               |      |
|                            | Ethnicity               | Yes                               | 8                | 0.96 (0.91-1.01)   | 75.0                               | <0.0001                            | NC   |
|                            |                         | No                                | 0                |                    |                                    |                                    |      |
|                            | Family history          | Yes                               | 3                | 0.89 (0.82-0.97)   | 0                                  | 0.47                               | 0.44 |
|                            |                         | No                                | 5                | 0.98 (0.92-1.03)   | 81.9                               | <0.0001                            |      |
|                            | Body mass index         | Yes                               | 8                | 0.96 (0.91-1.01)   | 75.0                               | <0.0001                            | NC   |
|                            |                         | No                                | 0                |                    |                                    |                                    |      |
|                            | Waist circumference/WHR | Yes                               | 1                | 0.82 (0.72-0.93)   |                                    |                                    | 0.18 |
|                            |                         | No                                | 7                | 0.98 (0.93-1.02)   | 71.2                               | 0.002                              |      |
|                            | Hypertension            | Yes                               | 4                | 0.92 (0.78-1.08)   | 67.8                               | 0.03                               | 0.81 |
|                            |                         | No                                | 4                | 0.97 (0.92-1.02)   | 81.9                               | 0.001                              |      |
|                            | Alcohol                 | Yes                               | 8                | 0.96 (0.91-1.01)   | 75.0                               | <0.0001                            | NC   |
|                            |                         | No                                | 0                |                    |                                    |                                    |      |
|                            | Smoking                 | Yes                               | 8                | 0.96 (0.91-1.01)   | 75.0                               | <0.0001                            | NC   |
|                            |                         | No                                | 0                |                    |                                    |                                    |      |
|                            | Physical activity       | Yes                               | 8                | 0.96 (0.91-1.01)   | 75.0                               | <0.0001                            | NC   |
|                            |                         | No                                | 0                |                    |                                    |                                    |      |
|                            | Meat consumption        | Yes                               | 3                | 0.92 (0.79-1.07)   | 76.0                               | 0.02                               | 0.68 |
|                            |                         | No                                | 5                | 0.98 (0.94-1.03)   | 73.1                               | 0.005                              |      |
|                            | Soft drink              | Yes                               | 2                | 0.98 (0.78-1.22)   | 81.1                               | 0.02                               | 0.63 |
|                            |                         | No                                | 6                | 0.96 (0.91-1.01)   | 77.4                               | 0.001                              |      |
|                            | Whole grain             | Yes                               | 2                | 0.98 (0.78-1.22)   | 81.1                               | 0.02                               | 0.63 |
|                            |                         | No                                | 6                | 0.96 (0.91-1.01)   | 77.4                               | 0.001                              |      |
|                            | Coffee                  | Yes                               | 3                | 0.86 (0.76-1.14)   | 70.4                               | 0.03                               | 0.93 |
|                            |                         | No                                | 5                | 0.96 (0.91-1.02)   | 80.2                               | <0.0001                            |      |
|                            | Energy intake           | Yes                               | 8                | 0.96 (0.91-1.01)   | 75.0                               | <0.0001                            | NC   |
|                            |                         | No                                | 0                |                    |                                    |                                    |      |

*n* = number of studies<sup>a</sup> *P* for heterogeneity within each subgroup<sup>b</sup> *P* for heterogeneity between subgroups with meta-regression analysis

NC not calculatable

**Supplemental Table 19.** Subgroup analyses of potato (total) intake and type 2 diabetes, dose-response

|                            |                         | Potatoes (total), 100 g/day |                  |                    |                                    |                                    |      |
|----------------------------|-------------------------|-----------------------------|------------------|--------------------|------------------------------------|------------------------------------|------|
|                            |                         | <i>n</i>                    | RR (95% CI)      | I <sup>2</sup> (%) | <i>P</i> <sub>h</sub> <sup>a</sup> | <i>P</i> <sub>h</sub> <sup>b</sup> |      |
| All studies                |                         | 8                           | 1.08 (1.02-1.15) | 55.4               | 0.03                               |                                    |      |
| Duration of follow-up      |                         |                             |                  |                    |                                    |                                    |      |
|                            | <10 years follow-up     | 3                           | 0.95 (0.78-1.16) | 60.1               | 0.08                               | 0.08                               |      |
|                            | ≥10 years follow-up     | 5                           | 1.11 (1.08-1.15) | 0                  | 0.43                               |                                    |      |
| Gender                     |                         |                             |                  |                    |                                    |                                    |      |
|                            | Men                     | 1                           | 1.12 (1.04-1.20) |                    |                                    | 0.64                               |      |
|                            | Women                   | 3                           | 1.09 (1.02-1.15) | 57.5               | 0.01                               |                                    |      |
|                            | Men and women           | 4                           | 0.94 (0.71-1.24) | 71.3               | 0.02                               |                                    |      |
| Geographic location        |                         |                             |                  |                    |                                    |                                    |      |
|                            | Europe                  | 1                           | 1.17 (1.02-1.35) |                    |                                    | 0.20                               |      |
|                            | America                 | 4                           | 1.10 (1.05-1.14) | 39.5               | 0.18                               |                                    |      |
|                            | Asia                    | 2                           | 0.46 (0.19-1.13) | 43.1               | 0.19                               |                                    |      |
|                            | Australia               | 1                           | 0.97 (0.81-1.15) |                    |                                    |                                    |      |
| Number of cases            |                         |                             |                  |                    |                                    |                                    |      |
|                            | Cases <1.000            | 3                           | 0.99 (0.74-1.33) | 76.6               | 0.01                               | 0.45                               |      |
|                            | Cases 1.000-<2.000      | 1                           | 1.00 (0.91-1.10) |                    |                                    |                                    |      |
|                            | Cases ≥2.000            | 4                           | 1.11 (1.07-1.15) | 6.7                | 0.36                               |                                    |      |
| Study quality              |                         |                             |                  |                    |                                    |                                    |      |
|                            | 0-3                     | 0                           |                  |                    |                                    | 0.38                               |      |
|                            | >3-6                    | 1                           | 0.97 (0.81-1.15) |                    |                                    |                                    |      |
|                            | >6-8                    | 7                           | 1.09 (1.03-1.16) | 56.1               | 0.03                               |                                    |      |
| Adjustment for confounders |                         |                             |                  |                    |                                    |                                    |      |
|                            | Age                     | Yes                         | 8                | 1.08 (1.02-1.15)   | 55.4                               | 0.03                               | NC   |
|                            |                         | No                          | 0                |                    |                                    |                                    |      |
|                            | Education               | Yes                         | 2                | 0.92 (0.72-1.18)   | 12.0                               | 0.29                               | 0.28 |
|                            |                         | No                          | 6                | 1.10 (1.04-1.16)   | 56.7                               | 0.04                               |      |
|                            | Ethnicity               | Yes                         | 4                | 1.10 (1.06-1.15)   | 10.7                               | 0.34                               | 0.42 |
|                            |                         | No                          | 4                | 0.99 (0.78-1.24)   | 71.7                               | 0.01                               |      |
|                            | Family history          | Yes                         | 7                | 1.09 (1.03-1.15)   | 55.9                               | 0.03                               | 0.36 |
|                            |                         | No                          | 1                | 0.65 (0.32-1.32)   |                                    |                                    |      |
|                            | Body mass index         | Yes                         | 8                | 1.08 (1.02-1.15)   | 55.4                               | 0.03                               | NC   |
|                            |                         | No                          | 0                |                    |                                    |                                    |      |
|                            | Waist circumference/WHR | Yes                         | 1                | 0.97 (0.81-1.15)   |                                    |                                    | 0.38 |
|                            |                         | No                          | 7                | 1.09 (1.03-1.16)   | 56.1                               | 0.03                               |      |
|                            | Hypertension            | Yes                         | 2                | 0.93 (0.69-1.27)   | 28.2                               | 0.24                               | 0.17 |
|                            |                         | No                          | 6                | 1.10 (1.05-1.17)   | 49.2                               | 0.08                               |      |
|                            | Alcohol                 | Yes                         | 6                | 1.08 (1.03-1.14)   | 44.5                               | 0.11                               | 0.65 |
|                            |                         | No                          | 2                | 0.61 (0.14-2.73)   | 83.7                               | 0.01                               |      |
|                            | Smoking                 | Yes                         | 7                | 1.09 (1.03-1.16)   | 56.1                               | 0.03                               | 0.38 |
|                            |                         | No                          | 1                | 0.97 (0.81-1.15)   |                                    |                                    |      |
|                            | Physical activity       | Yes                         | 7                | 1.07 (1.00-1.14)   | 59.1                               | 0.02                               | 0.51 |
|                            |                         | No                          | 1                | 1.17 (1.02-1.35)   |                                    |                                    |      |
|                            | Meat consumption        | Yes                         | 1                | 0.65 (0.32-1.32)   |                                    |                                    | 0.36 |
|                            |                         | No                          | 7                | 1.09 (1.03-1.15)   | 55.9                               | 0.03                               |      |
|                            | Soft drink              | Yes                         | 1                | 0.65 (0.32-1.32)   |                                    |                                    | 0.36 |
|                            |                         | No                          | 7                | 1.09 (1.03-1.15)   | 55.9                               | 0.03                               |      |
|                            | Whole grain             | Yes                         | 2                | 0.46 (0.19-1.13)   | 43.1                               | 0.19                               | 0.09 |
|                            |                         | No                          | 6                | 1.09 (1.05-1.14)   | 36.9                               | 0.16                               |      |
|                            | Coffee                  | Yes                         | 1                | 0.65 (0.32-1.32)   |                                    |                                    | 0.36 |
|                            |                         | No                          | 7                | 1.09 (1.03-1.15)   | 55.9                               | 0.03                               |      |
|                            | Energy intake           | Yes                         | 8                | 1.08 (1.02-1.15)   | 55.4                               | 0.03                               | NC   |
|                            |                         | No                          | 0                |                    |                                    |                                    |      |

*n* = number of studies<sup>a</sup> *P* for heterogeneity within each subgroup<sup>b</sup> *P* for heterogeneity between subgroups with meta-regression analysis

NC not calculatable

**Supplemental Table 20.** World Cancer Research Fund grading criteria

| Grading              | Criteria                                                                                                                                                                                                                                                                                                                                                                                                                                                                                                                                                                                                                                                                                                                                                                                                                                                                                                                                                                                                                                                                                                                                                                    |
|----------------------|-----------------------------------------------------------------------------------------------------------------------------------------------------------------------------------------------------------------------------------------------------------------------------------------------------------------------------------------------------------------------------------------------------------------------------------------------------------------------------------------------------------------------------------------------------------------------------------------------------------------------------------------------------------------------------------------------------------------------------------------------------------------------------------------------------------------------------------------------------------------------------------------------------------------------------------------------------------------------------------------------------------------------------------------------------------------------------------------------------------------------------------------------------------------------------|
| Convincing           | <p>A convincing relationship should be robust enough to be highly unlikely to be modified in the foreseeable future as new evidence accumulates. All of the following are generally required:</p> <ul style="list-style-type: none"> <li>- Evidence from more than one study type</li> <li>- Evidence from at least two independent cohort studies</li> <li>- No substantial unexplained heterogeneity within or between study types or in different populations relating to the presence or absence of an association, or direction of effect</li> <li>- Good quality studies to exclude with confidence the possibility that the observed association results from random or systematic error, including confounding, measurement error, and selection bias</li> <li>- Presence of a plausible biological gradient in the association. Such a gradient need not be linear or even in the same direction across different levels of exposure, so long as this can be explained plausibly</li> <li>- Strong and plausible experimental evidence, either from human studies or relevant animal models, that typical human exposures can lead to relevant outcomes</li> </ul> |
| Probable             | <p>All of the following are generally required:</p> <ul style="list-style-type: none"> <li>- Evidence from at least two independent cohort studies, or at least five case-control studies</li> <li>- No substantial unexplained heterogeneity within or between study types or in different populations relating to the presence or absence of an association, or direction of effect</li> <li>- Good quality studies to exclude with confidence the possibility that the observed association results from random or systematic error, including confounding, measurement error, and selection bias</li> <li>- Evidence for biological plausibility</li> </ul>                                                                                                                                                                                                                                                                                                                                                                                                                                                                                                             |
| Limited - suggestive | <p>All of the following are generally required:</p> <ul style="list-style-type: none"> <li>- Evidence from at least two independent cohort studies, or at least five case-control studies</li> <li>- The direction of effect is generally consistent though some unexplained heterogeneity may be present</li> <li>- Evidence for biological plausibility</li> </ul>                                                                                                                                                                                                                                                                                                                                                                                                                                                                                                                                                                                                                                                                                                                                                                                                        |

|                                     |                                                                                                                                                                                                                                                                                                                                                                                                                                                                                                                                                                                                                                                                                                                                                                                                                                                                                                                                                                                    |
|-------------------------------------|------------------------------------------------------------------------------------------------------------------------------------------------------------------------------------------------------------------------------------------------------------------------------------------------------------------------------------------------------------------------------------------------------------------------------------------------------------------------------------------------------------------------------------------------------------------------------------------------------------------------------------------------------------------------------------------------------------------------------------------------------------------------------------------------------------------------------------------------------------------------------------------------------------------------------------------------------------------------------------|
| Limited - no conclusion             | Evidence is so limited that no firm conclusion can be made, but this does not mean that there is evidence of no relationship. The evidence might be graded "limited - no conclusion" for several reasons: <ul style="list-style-type: none"> <li>- limited number of studies</li> <li>- inconsistency of direction of effect</li> <li>- poor quality of studies (e.g. lack of adjustment for known confounders)</li> <li>- or any combination of these factors</li> </ul>                                                                                                                                                                                                                                                                                                                                                                                                                                                                                                          |
| Substantial effect on risk unlikely | All of the following are generally required: <ul style="list-style-type: none"> <li>- Evidence from more than one study type</li> <li>- Evidence from at least two independent cohort studies</li> <li>- Summary estimate of effect close to 1.0 for comparison of high versus low exposure categories</li> <li>- No substantial unexplained heterogeneity within or between study types or in different populations</li> <li>- Good quality studies to exclude with confidence the possibility that the absence of association results from random or systematic error, including inadequate power, imprecision or error in exposure measurement, inadequate range of exposure, confounding, and selection bias</li> <li>- Absence of a demonstrable biological gradient (dose response)</li> <li>- Absence of strong and plausible experimental evidence, either from human studies or relevant animal models, that typical human exposures lead to relevant outcomes</li> </ul> |

Specific upgrading factors:

- 1) Presence of a plausible biological gradient (dose response) in the association. Such a gradient need not be linear or even in the same direction across the different levels of exposure, so long as this can be explained plausibly.
- 2) A particularly large summary effect size (an odds ratio or relative risk of 2.0 or more, depending on the unit of exposure) after appropriate control for confounders.
- 3) Evidence from randomised trials in humans.
- 4) Evidence from appropriately controlled experiments demonstrating one or more plausible and specific mechanisms actually operating in humans.
- 5) Robust and reproducible evidence from experimental studies in appropriate animal models showing that typical human exposures can lead to relevant health outcomes.

**Supplemental Table 21.** Justification for evidence grading for fruit and vegetables and type 2 diabetes

| Requirements for grading of convincing                                                                                                                                           | Fruit and vegetables                                                                                                                                                                                                                                                                                                             | Fruits                                                                                                                                                                                                                                                                                                                                                                                                                                | Vegetables                                                                                                                                                                                                                                                                                                                                           |
|----------------------------------------------------------------------------------------------------------------------------------------------------------------------------------|----------------------------------------------------------------------------------------------------------------------------------------------------------------------------------------------------------------------------------------------------------------------------------------------------------------------------------|---------------------------------------------------------------------------------------------------------------------------------------------------------------------------------------------------------------------------------------------------------------------------------------------------------------------------------------------------------------------------------------------------------------------------------------|------------------------------------------------------------------------------------------------------------------------------------------------------------------------------------------------------------------------------------------------------------------------------------------------------------------------------------------------------|
| Statistically significant and robust association                                                                                                                                 | Statistically significant weak inverse association for high vs. low analysis, but this is not robust in influence analyses. The linear and nonlinear dose-response analyses show a non-significant inverse association. Three studies only reported dichotomous results and could not be included in the dose-response analyses. | Statistically significant weak inverse association for high vs. low and nonlinear analysis, borderline significant in linear dose-response, but there is strong evidence of nonlinearity. High vs. low analysis is robust in influence analyses.                                                                                                                                                                                      | No significant association in the high vs. low or linear dose-response analysis, but there is evidence of nonlinearity with a significant reduction at an intake of 100-400 g/d. The lack of association in high vs. low and linear dose-response analyses are not driven by any single studies.                                                     |
| Evidence from at least two independent cohort studies                                                                                                                            | 10 studies (high vs. low)<br>7 studies (dose-response)                                                                                                                                                                                                                                                                           | 20 studies (high vs. low)<br>19 studies (dose-response)                                                                                                                                                                                                                                                                                                                                                                               | 17 studies (high vs. low)<br>15 studies (dose-response)                                                                                                                                                                                                                                                                                              |
| No substantial unexplained heterogeneity within or between study types or in different populations relating to the presence or absence of an association, or direction of effect | There is no heterogeneity in the high vs. low analysis and low heterogeneity in the dose-response analysis. The inverse association in high vs. low analyses persists in several, but not all subgroup analyses.                                                                                                                 | Low heterogeneity in high vs. low analysis and moderate to high heterogeneity in the linear dose-response analysis. Most studies show risk estimates in the direction of reduced risk for the high vs. low comparison, although only four studies show a statistically significant reduction in risk, but confidence intervals are somewhat wide and overlapping for several studies. No studies show a significant increase in risk. | Moderate to high heterogeneity in the high vs. low and dose-response analyses. Eleven of 17 studies reported risk estimates in the direction of reduced risk, but only two of these are statistically significant. No studies reported a significant increase in risk, although some studies also report relative risks non-significantly above 1.0. |
| Good quality studies to exclude with confidence the possibility that the observed association results from random or systematic error,                                           | No indication of publication bias<br><br>Results persisted in several, although not all subgroup analyses. However, there was no indication of between                                                                                                                                                                           | No indication of publication bias.<br><br>Results are in general consistent in subgroup analyses, although for some subgroups there is low power due to few studies. There is little                                                                                                                                                                                                                                                  | Egger's test was significant for the dose-response analysis, but not for the high vs. low analysis.<br><br>Subgroup analyses based on high vs. low and dose-response analyses                                                                                                                                                                        |

|                                                                                                                                                                                                                         |                                                                                                                                                                                                                                                                                                                                                                                                                                               |                                                                                                                                                                                                                                                                                                                                                                                                                                                                                                                                                                                                                                                                                                                                                                |                                                                                                                                                                                                                                                                                                                                                                                                                                       |
|-------------------------------------------------------------------------------------------------------------------------------------------------------------------------------------------------------------------------|-----------------------------------------------------------------------------------------------------------------------------------------------------------------------------------------------------------------------------------------------------------------------------------------------------------------------------------------------------------------------------------------------------------------------------------------------|----------------------------------------------------------------------------------------------------------------------------------------------------------------------------------------------------------------------------------------------------------------------------------------------------------------------------------------------------------------------------------------------------------------------------------------------------------------------------------------------------------------------------------------------------------------------------------------------------------------------------------------------------------------------------------------------------------------------------------------------------------------|---------------------------------------------------------------------------------------------------------------------------------------------------------------------------------------------------------------------------------------------------------------------------------------------------------------------------------------------------------------------------------------------------------------------------------------|
| <p>including confounding, measurement error, and selection bias</p>                                                                                                                                                     | <p>subgroup heterogeneity with meta-regression analyses.</p> <p>No studies corrected for measurement error, but one study (EPIC-InterAct) using biomarkers of fruit and vegetable intakes reported substantially stronger associations than FFQ-based fruit and vegetable intakes.</p> <p>All studies excluded prevalent type 2 diabetes cases at baseline. Exposed and non-exposed participants were selected from the same populations.</p> | <p>indication of significant between subgroup heterogeneity. Exceptions are subgroup with adjustment for family history of diabetes, which shows a significant inverse association and the subgroup of studies with adjustment for waist measures of adiposity, which shows no association. However, both general and abdominal adiposity could potentially be mediators.</p> <p>No studies corrected for measurement error, but one study (EPIC-InterAct) using biomarkers of fruit and vegetable intakes reported substantially stronger associations than FFQ-based fruit and vegetable intakes.</p> <p>All studies excluded prevalent type 2 diabetes cases at baseline. Exposed and non-exposed participants were selected from the same populations.</p> | <p>show consistently no significant association.</p> <p>No studies corrected for measurement error, but one study (EPIC-InterAct) using biomarkers of fruit and vegetable intakes reported substantially stronger associations than FFQ-based fruit and vegetable intakes.</p> <p>All studies excluded prevalent type 2 diabetes cases at baseline. Exposed and non-exposed participants were selected from the same populations.</p> |
| <p>Presence of a plausible biological gradient in the association. Such a gradient need not be linear or even in the same direction across different levels of exposure, so long as this can be explained plausibly</p> | <p>Some indication of a weak dose-response relationship up to 300-500 g/d and the test for nonlinearity is not significant (<math>p=0.13</math>), although there is no further reductions in risk up to 800 g/d.</p>                                                                                                                                                                                                                          | <p>There is strong evidence of nonlinearity with a reverse J-shaped or U-shaped association. Several subtypes of fruit are inversely associated with type 2 diabetes, while a few fruit subtypes (cantaloupe, watermelon) are slightly positively associated with type 2 diabetes. Although it is not clear whether some of these are due to selective reporting or if there is a real increase in risk, different directions of risk between fruit subtypes could potentially explain the observed U-shaped dose-response relationship.</p>                                                                                                                                                                                                                   | <p>There is evidence of nonlinearity (<math>p=0.004</math>) and a slight reverse J-shaped or U-shaped association with a significant reduction in risk at intakes of 100-400 g/d, but the association is non-significant at higher intakes.</p>                                                                                                                                                                                       |



|                                                                                                                                                                    |                                                                                                                                                                                                                                                                                                                                                                                                                                                                                                                                                                                                                                                                                                                                                                                                                                                                                                                                                                                                                                                                                                                                                                                                                                  |                                                                                                                                                                                                                                                                                                                                                                                                                                                                                                                                                                                                                                                                                                                                                                                                                                                                                                                                                                                                                                                                                                                                                                          |                                                                                                                                                                                                                                                                                                                                                                                                                                                                                                                                                                                                                                                                                                                                                                                                                                                                                                                                                                                                                                                                                                                                                                                        |
|--------------------------------------------------------------------------------------------------------------------------------------------------------------------|----------------------------------------------------------------------------------------------------------------------------------------------------------------------------------------------------------------------------------------------------------------------------------------------------------------------------------------------------------------------------------------------------------------------------------------------------------------------------------------------------------------------------------------------------------------------------------------------------------------------------------------------------------------------------------------------------------------------------------------------------------------------------------------------------------------------------------------------------------------------------------------------------------------------------------------------------------------------------------------------------------------------------------------------------------------------------------------------------------------------------------------------------------------------------------------------------------------------------------|--------------------------------------------------------------------------------------------------------------------------------------------------------------------------------------------------------------------------------------------------------------------------------------------------------------------------------------------------------------------------------------------------------------------------------------------------------------------------------------------------------------------------------------------------------------------------------------------------------------------------------------------------------------------------------------------------------------------------------------------------------------------------------------------------------------------------------------------------------------------------------------------------------------------------------------------------------------------------------------------------------------------------------------------------------------------------------------------------------------------------------------------------------------------------|----------------------------------------------------------------------------------------------------------------------------------------------------------------------------------------------------------------------------------------------------------------------------------------------------------------------------------------------------------------------------------------------------------------------------------------------------------------------------------------------------------------------------------------------------------------------------------------------------------------------------------------------------------------------------------------------------------------------------------------------------------------------------------------------------------------------------------------------------------------------------------------------------------------------------------------------------------------------------------------------------------------------------------------------------------------------------------------------------------------------------------------------------------------------------------------|
| <p>Strong and plausible experimental evidence, either from human studies or relevant animal models, that typical human exposures can lead to relevant outcomes</p> | <p>Fruits and vegetables are important sources of dietary fiber, for which there is convincing evidence of a protective effect on adiposity and weight gain, which are major risk factors for type 2 diabetes.</p> <p>There is also considerable evidence from observational studies that a high fruit and vegetable intake reduces weight gain and prevents the development of overweight and obesity. Results from randomized trials show weaker associations between fruit and vegetable intake and weight gain, but are of short duration and there may be issues with compliance.</p> <p>Fruits and vegetables have a high content of various antioxidants, flavonoids and phytochemicals that may contribute towards reduced type 2 diabetes risk. Flavonoids have for example in animal and in vitro studies been shown to regulate carbohydrate digestion, insulin secretion, insulin sensitivity, insulin signaling, and glucose uptake in insulin-sensitive issues through various intracellular signaling pathways. Flavonoids may also protect insulin-producing beta-cells from inflammatory cytokine-induced cytotoxicity, promote beta-cell function and viability, and protect beta-cells against apoptosis.</p> | <p>Fruits are an important source of dietary fiber, for which there is convincing evidence of a protective effect on adiposity and weight gain, which are major risk factors for type 2 diabetes.</p> <p>There is also considerable evidence from observational studies that a high fruit intake reduces weight gain and prevents the development of overweight and obesity. Results from randomized trials show weaker associations between fruit intake and weight gain, but are of short duration and there may be issues with compliance.</p> <p>Fruits have a high content of various antioxidants, flavonoids and phytochemicals that may contribute towards reduced type 2 diabetes risk. Flavonoids have for example in animal and in vitro studies been shown to regulate carbohydrate digestion, insulin secretion, insulin sensitivity, insulin signaling, and glucose uptake in insulin-sensitive issues through various intracellular signaling pathways. Flavonoids may also protect insulin-producing beta-cells from inflammatory cytokine-induced cytotoxicity, promote beta-cell function and viability, and protect beta-cells against apoptosis.</p> | <p>Vegetables are important sources of dietary fiber, for which there is convincing evidence of a protective effect on adiposity and weight gain, which are major risk factors for type 2 diabetes.</p> <p>There is also considerable evidence from observational studies that a high vegetable intake reduces weight gain and prevents the development of overweight and obesity. Results from randomized trials show weaker associations between vegetable intake and weight gain, but are of short duration and there may be issues with compliance.</p> <p>Vegetables have a high content of various antioxidants, flavonoids and phytochemicals that may contribute towards reduced type 2 diabetes risk. Flavonoids have for example in animal and in vitro studies been shown to regulate carbohydrate digestion, insulin secretion, insulin sensitivity, insulin signaling, and glucose uptake in insulin-sensitive issues through various intracellular signaling pathways. Flavonoids may also protect insulin-producing beta-cells from inflammatory cytokine-induced cytotoxicity, promote beta-cell function and viability, and protect beta-cells against apoptosis.</p> |
|--------------------------------------------------------------------------------------------------------------------------------------------------------------------|----------------------------------------------------------------------------------------------------------------------------------------------------------------------------------------------------------------------------------------------------------------------------------------------------------------------------------------------------------------------------------------------------------------------------------------------------------------------------------------------------------------------------------------------------------------------------------------------------------------------------------------------------------------------------------------------------------------------------------------------------------------------------------------------------------------------------------------------------------------------------------------------------------------------------------------------------------------------------------------------------------------------------------------------------------------------------------------------------------------------------------------------------------------------------------------------------------------------------------|--------------------------------------------------------------------------------------------------------------------------------------------------------------------------------------------------------------------------------------------------------------------------------------------------------------------------------------------------------------------------------------------------------------------------------------------------------------------------------------------------------------------------------------------------------------------------------------------------------------------------------------------------------------------------------------------------------------------------------------------------------------------------------------------------------------------------------------------------------------------------------------------------------------------------------------------------------------------------------------------------------------------------------------------------------------------------------------------------------------------------------------------------------------------------|----------------------------------------------------------------------------------------------------------------------------------------------------------------------------------------------------------------------------------------------------------------------------------------------------------------------------------------------------------------------------------------------------------------------------------------------------------------------------------------------------------------------------------------------------------------------------------------------------------------------------------------------------------------------------------------------------------------------------------------------------------------------------------------------------------------------------------------------------------------------------------------------------------------------------------------------------------------------------------------------------------------------------------------------------------------------------------------------------------------------------------------------------------------------------------------|

|                                                                |                                                                                                                                                                                                                                                                                                                                                                                                                                                                                                                                                |                                                                                                                                                                                                                                                                                                                                                                                                                                                                                                                                                                                                                                                                                                                                    |                                                                                                                                                                                                                                                                                                                                                                                                                                                                                                                                                                                                                                                                                                                                                                                                                                                                                                                                                 |
|----------------------------------------------------------------|------------------------------------------------------------------------------------------------------------------------------------------------------------------------------------------------------------------------------------------------------------------------------------------------------------------------------------------------------------------------------------------------------------------------------------------------------------------------------------------------------------------------------------------------|------------------------------------------------------------------------------------------------------------------------------------------------------------------------------------------------------------------------------------------------------------------------------------------------------------------------------------------------------------------------------------------------------------------------------------------------------------------------------------------------------------------------------------------------------------------------------------------------------------------------------------------------------------------------------------------------------------------------------------|-------------------------------------------------------------------------------------------------------------------------------------------------------------------------------------------------------------------------------------------------------------------------------------------------------------------------------------------------------------------------------------------------------------------------------------------------------------------------------------------------------------------------------------------------------------------------------------------------------------------------------------------------------------------------------------------------------------------------------------------------------------------------------------------------------------------------------------------------------------------------------------------------------------------------------------------------|
| <p>Final grading and justification for overall assessment.</p> | <p>Limited-suggestive evidence for reduced risk with higher fruit and vegetable intake.</p> <p>Justification: Primarily based on significant high vs. low analysis and marginally significant nonlinear dose-response analysis. Results are in general consistent across several, but not all subgroups. Low heterogeneity, no publication bias, no indication of selection bias. Biologically plausible mechanisms exist, but a more precise and robust summary estimate and more details on mechanisms could have led to higher grading.</p> | <p>Probable evidence for reduced type 2 diabetes risk with higher fruit intake.</p> <p>Justification: Significant high vs. low and nonlinear dose-response analysis with evidence of nonlinearity (therefore less emphasis on linear dose-response analysis). Low heterogeneity, robust results in many subgroup analyses as well as in influence analyses (high vs. low comparison). No publication, no indication of selection bias. The overall data for fruits are also consistent with the results for several subtypes of fruits, which show inverse associations (although the number of studies is limited). Biologically plausible mechanisms exist, but more details on mechanisms could have led to higher grading.</p> | <p>Limited-no conclusion evidence for reduced risk of type 2 diabetes with higher vegetable intake.</p> <p>Justification: This is largely based on the lack of association in both high vs. low and linear dose-response analysis. Although there is indication of nonlinearity in the nonlinear analysis, and a weak association cannot be excluded, there is insufficient evidence at present for a higher grading. The null results are robust in subgroup and influence analyses. There is some heterogeneity and indication of publication bias in the dose-response analysis, but in sensitivity analyses this is not substantially affecting the results. No indication of selection bias. None of the vegetable subtypes showed significant inverse associations, although power may be low because of a limited number of studies. Biologically plausible mechanisms by which vegetables could reduced type 2 diabetes risk exist.</p> |
|----------------------------------------------------------------|------------------------------------------------------------------------------------------------------------------------------------------------------------------------------------------------------------------------------------------------------------------------------------------------------------------------------------------------------------------------------------------------------------------------------------------------------------------------------------------------------------------------------------------------|------------------------------------------------------------------------------------------------------------------------------------------------------------------------------------------------------------------------------------------------------------------------------------------------------------------------------------------------------------------------------------------------------------------------------------------------------------------------------------------------------------------------------------------------------------------------------------------------------------------------------------------------------------------------------------------------------------------------------------|-------------------------------------------------------------------------------------------------------------------------------------------------------------------------------------------------------------------------------------------------------------------------------------------------------------------------------------------------------------------------------------------------------------------------------------------------------------------------------------------------------------------------------------------------------------------------------------------------------------------------------------------------------------------------------------------------------------------------------------------------------------------------------------------------------------------------------------------------------------------------------------------------------------------------------------------------|

**Supplemental Table 22.** Evidence grading for fruit and vegetables and subtypes and type 2 diabetes

|                         | Reduced risk                                                                                                                                                                                                                                                                                       | Increased risk                                                                       |
|-------------------------|----------------------------------------------------------------------------------------------------------------------------------------------------------------------------------------------------------------------------------------------------------------------------------------------------|--------------------------------------------------------------------------------------|
| Convincing              | -                                                                                                                                                                                                                                                                                                  | -                                                                                    |
| Probable                | Fruits                                                                                                                                                                                                                                                                                             | -                                                                                    |
| Limited-suggestive      | Fruits and vegetables combined, blueberries, prunes, grapes and raisins, apples/pears, apples, grapefruit                                                                                                                                                                                          | Fruit juice, fruit drinks, total potatoes, brussels sprouts, cauliflower, cantaloupe |
| Limited - no conclusion | Vegetables, peaches/plums/apricots, bananas, berries, oranges, citrus fruits, watermelon, strawberries, 100% fruit juice, boiled potatoes, allium vegetables, yellow vegetables, cruciferous vegetables, green leafy vegetables, mushrooms, kale/mustard/chard greens, broccoli, cabbage, tomatoes |                                                                                      |

For fruit and vegetable subtypes these judgments were largely based on the limited number of studies published. A larger number of studies were published on potatoes and fruit juice and fruit drinks, however, results were not robust in influence analyses and across all subgroup analyses, thus further studies are needed before an upgrade of the evidence grading can be made. There is supporting evidence of biological plausibility for several fruit and vegetable subtypes (e.g. blueberries, apples, grapes/raisins, grapefruit, fruit juice, fruit drinks).
