# Supplementary material for: Fruit and vegetable consumption and the risk of type 2 diabetes: a systematic review and dose–response meta-analysis of prospective studies
Source: PubMed Central journal article supplement — BMJ Nutr Prev Health. 2021 Jul 2;4(2):519–31. doi: 10.1136/bmjnph-2020-000218 (PMC8718861; doi:10.1136/bmjnph-2020-000218), 2021-07-02
Supplement: bmjnph-2020-000218supp002.pdf [file bmjnph-2020-000218supp002.pdf]

## Supplemental Figures

### Supplemental Figures of subtypes of fruit, high vs. low, linear and nonlinear dose response analyses

**Supplemental Figure 1.** Apples and type 2 diabetes, high vs. low

**Supplemental Figure 2.** Apples and type 2 diabetes, dose-response analysis per 100 g/d

**Supplemental Figure 3.** Apples and type 2 diabetes, nonlinear dose-response analysis

**Supplemental Figure 4.** Apples and pears and type 2 diabetes, high vs. low

**Supplemental Figure 5.** Apples and pears and type 2 diabetes, dose-response analysis per 100 g/d

**Supplemental Figure 6.** Apples and pears and type 2 diabetes, nonlinear dose-response analysis

**Supplemental Figure 7.** Bananas and type 2 diabetes, high vs. low

**Supplemental Figure 8.** Bananas and type 2 diabetes, dose-response analysis per 100 g/d

**Supplemental Figure 9.** Bananas and type 2 diabetes, nonlinear dose-response analysis

**Supplemental Figure 10.** Berries and type 2 diabetes, high vs. low

**Supplemental Figure 11.** Berries and type 2 diabetes, dose-response analysis per 50 g/d

**Supplemental Figure 12.** Berries and type 2 diabetes, nonlinear dose-response analysis

**Supplemental Figure 13.** Blueberries and type 2 diabetes, high vs. low

**Supplemental Figure 14.** Blueberries and type 2 diabetes, dose-response analysis per 50 g/d

**Supplemental Figure 15.** Blueberries and type 2 diabetes, nonlinear dose-response analysis

**Supplemental Figure 16.** Cantaloupe and type 2 diabetes, high vs. low

**Supplemental Figure 17.** Cantaloupe and type 2 diabetes, dose-response analysis per 100 g/d

**Supplemental Figure 18.** Cantaloupe and type 2 diabetes, nonlinear dose-response analysis

**Supplemental Figure 19.** Citrus fruits and type 2 diabetes, high vs. low

**Supplemental Figure 20.** Citrus fruits and type 2 diabetes, dose-response analysis per 100 g/d

**Supplemental Figure 21.** Citrus fruits and type 2 diabetes, nonlinear dose-response analysis

**Supplemental Figure 22.** Fruit drinks and type 2 diabetes, high vs. low

**Supplemental Figure 23.** Fruit drinks and type 2 diabetes, dose-response analysis per 250 g/d

**Supplemental Figure 24.** Fruit drinks and type 2 diabetes, nonlinear dose-response analysis

**Supplemental Figure 25.** Fruit juice and type 2 diabetes, high vs. low

**Supplemental Figure 26.** Fruit juice and type 2 diabetes, dose-response analysis per 250 g/d

**Supplemental Figure 27.** Fruit juice and type 2 diabetes, nonlinear dose-response analysis

**Supplemental Figure 28.** 100% fruit juice and type 2 diabetes, high vs. low

**Supplemental Figure 29.** 100% fruit juice and type 2 diabetes, dose-response analysis per 250 g/d

**Supplemental Figure 30.** 100% fruit juice and type 2 diabetes, nonlinear dose-response analysis

**Supplemental Figure 31.** Grapefruit and type 2 diabetes, high vs. low

**Supplemental Figure 32.** Grapefruit and type 2 diabetes, dose-response analysis per 100 g/d

**Supplemental Figure 33.** Grapefruit and type 2 diabetes, nonlinear dose-response analysis

**Supplemental Figure 34.** Grapes and raisins and type 2 diabetes, high vs. low

**Supplemental Figure 35.** Grapes and raisins and type 2 diabetes, dose-response analysis per 50 g/d

**Supplemental Figure 36.** Grapes and raisins and type 2 diabetes, nonlinear dose-response analysis

**Supplemental Figure 37.** Oranges and type 2 diabetes, high vs. low

**Supplemental Figure 38.** Oranges and type 2 diabetes, dose-response analysis per 100 g/d

**Supplemental Figure 39.** Oranges and type 2 diabetes, nonlinear dose-response analysis

**Supplemental Figure 40.** Peaches, plums and apricots and type 2 diabetes, high vs. low

**Supplemental Figure 41.** Peaches, plums and apricots and type 2 diabetes, dose-response analysis per 100 g/d

**Supplemental Figure 42.** Peaches, plums and apricots and type 2 diabetes, nonlinear dose-response analysis

**Supplemental Figure 43.** Prunes and type 2 diabetes, high vs. low

**Supplemental Figure 44.** Prunes and type 2 diabetes, dose-response analysis per 100 g/d

**Supplemental Figure 45.** Prunes and type 2 diabetes, nonlinear dose-response analysis

**Supplemental Figure 46.** Strawberries and type 2 diabetes, high vs. low

**Supplemental Figure 47.** Strawberries and type 2 diabetes, dose-response analysis per 50 g/d

**Supplemental Figure 48.** Strawberries and type 2 diabetes, nonlinear dose-response analysis

**Supplemental Figure 49.** Watermelon and type 2 diabetes, high vs. low

**Supplemental Figure 50.** Watermelon and type 2 diabetes, dose-response analysis per 100 g/d

**Supplemental Figure 51.** Watermelon and type 2 diabetes, nonlinear dose-response analysis

### **Supplemental Figures of subtypes of vegetables**

**Supplemental Figure 52.** Allium vegetables and type 2 diabetes, high vs. low

**Supplemental Figure 53.** Allium vegetables and type 2 diabetes, dose-response analysis per 100 g/d

**Supplemental Figure 54.** Allium vegetables and type 2 diabetes, nonlinear dose-response analysis

**Supplemental Figure 55.** Broccoli and type 2 diabetes, high vs. low

**Supplemental Figure 56.** Broccoli and type 2 diabetes, dose-response analysis per 100 g/d

**Supplemental Figure 57.** Broccoli and type 2 diabetes, nonlinear dose-response analysis

**Supplemental Figure 58.** Brussels sprouts and type 2 diabetes, high vs. low

**Supplemental Figure 59.** Brussels sprouts and type 2 diabetes, dose-response analysis per 10 g/d

**Supplemental Figure 60.** Brussels sprouts and type 2 diabetes, nonlinear dose-response analysis

**Supplemental Figure 61.** Cabbage and type 2 diabetes, high vs. low

**Supplemental Figure 62.** Cabbage and type 2 diabetes, dose-response analysis per 100 g/d

**Supplemental Figure 63.** Cabbage and type 2 diabetes, nonlinear dose-response analysis

**Supplemental Figure 64.** Cauliflower and type 2 diabetes, high vs. low

**Supplemental Figure 65.** Cauliflower and type 2 diabetes, dose-response analysis per 100 g/d

**Supplemental Figure 66.** Cauliflower and type 2 diabetes, nonlinear dose-response analysis

**Supplemental Figure 67.** Cruciferous vegetables and type 2 diabetes, high vs. low

**Supplemental Figure 68.** Cruciferous vegetables and type 2 diabetes, dose-response analysis per 100 g/d

**Supplemental Figure 69.** Cruciferous vegetables and type 2 diabetes, nonlinear dose-response analysis

**Supplemental Figure 70.** Green leafy vegetables and type 2 diabetes, high vs. low

**Supplemental Figure 71.** Green leafy vegetables and type 2 diabetes, dose-response analysis per 100 g/d

**Supplemental Figure 72.** Green leafy vegetables and type 2 diabetes, nonlinear dose-response analysis

**Supplemental Figure 73.** Kale, mustard and chard greens and type 2 diabetes, high vs. low

**Supplemental Figure 74.** Kale, mustard and chard greens and type 2 diabetes, dose-response analysis per 10 g/d

**Supplemental Figure 75.** Kale, mustard and chard greens and type 2 diabetes, nonlinear dose-response analysis

**Supplemental Figure 76.** Mushrooms and type 2 diabetes, high vs. low

**Supplemental Figure 77.** Mushrooms and type 2 diabetes, dose-response analysis per 10 g/d

**Supplemental Figure 78.** Mushrooms and type 2 diabetes, nonlinear dose-response analysis

**Supplemental Figure 79.** Potatoes, boiled and type 2 diabetes, high vs. low

**Supplemental Figure 80.** Potatoes, boiled and type 2 diabetes, dose-response analysis per 100 g/d

- Supplemental Figure 81.** Potatoes, boiled and type 2 diabetes, nonlinear dose-response analysis  
**Supplemental Figure 82.** Potatoes, total and type 2 diabetes, high vs. low  
**Supplemental Figure 83.** Potatoes, total and type 2 diabetes, dose-response analysis per 100 g/d  
**Supplemental Figure 84.** Potatoes, total and type 2 diabetes, nonlinear dose-response analysis  
**Supplemental Figure 85.** Tomatoes and type 2 diabetes, high vs. low  
**Supplemental Figure 86.** Tomatoes and type 2 diabetes, dose-response analysis per 100 g/d  
**Supplemental Figure 87.** Tomatoes and type 2 diabetes, nonlinear dose-response analysis  
**Supplemental Figure 88.** Yellow vegetables and type 2 diabetes, high vs. low  
**Supplemental Figure 89.** Yellow vegetables and type 2 diabetes, dose-response analysis per 100 g/d  
**Supplemental Figure 90.** Yellow vegetables and type 2 diabetes, nonlinear dose-response analysis

### **Influence analyses**

- Supplemental Figure 91.** Influence analysis of fruit and vegetables and type 2 diabetes, high vs. low  
**Supplemental Figure 92.** Influence analysis of fruit and vegetables and type 2 diabetes, dose-response  
**Supplemental Figure 93.** Influence analysis of fruits and type 2 diabetes, high vs. low  
**Supplemental Figure 94.** Influence analysis of fruits and type 2 diabetes, dose-response  
**Supplemental Figure 95.** Influence analysis of vegetables and type 2 diabetes, high vs. low  
**Supplemental Figure 96.** Influence analysis of vegetables and type 2 diabetes, dose-response  
**Supplemental Figure 97.** Influence analysis of cruciferous vegetables and type 2 diabetes, dose-response  
**Supplemental Figure 98.** Influence analysis of fruit drinks and type 2 diabetes, dose-response  
**Supplemental Figure 99.** Influence analysis of green leafy vegetables and type 2 diabetes, dose-response  
**Supplemental Figure 100.** Influence analysis of potatoes, total and type 2 diabetes, dose response

### **Funnel plots**

- Supplemental Figure 101.** Funnel plot of fruit and vegetables and type 2 diabetes  
**Supplemental Figure 102.** Funnel plot of fruits and type 2 diabetes  
**Supplemental Figure 103.** Funnel plot of vegetables and type 2 diabetes  
**Supplemental Figure 104.** Funnel plot of cruciferous vegetables and type 2 diabetes  
**Supplemental Figure 105.** Funnel plot of green leafy vegetables and type 2 diabetes  
**Supplemental Figure 106.** Funnel plot of potatoes (total) and type 2 diabetes

## Supplemental Figures of subtypes of fruit, high vs. low, linear and nonlinear dose response analyses

Supplemental Figure 1. Apples and type 2 diabetes, high vs. low

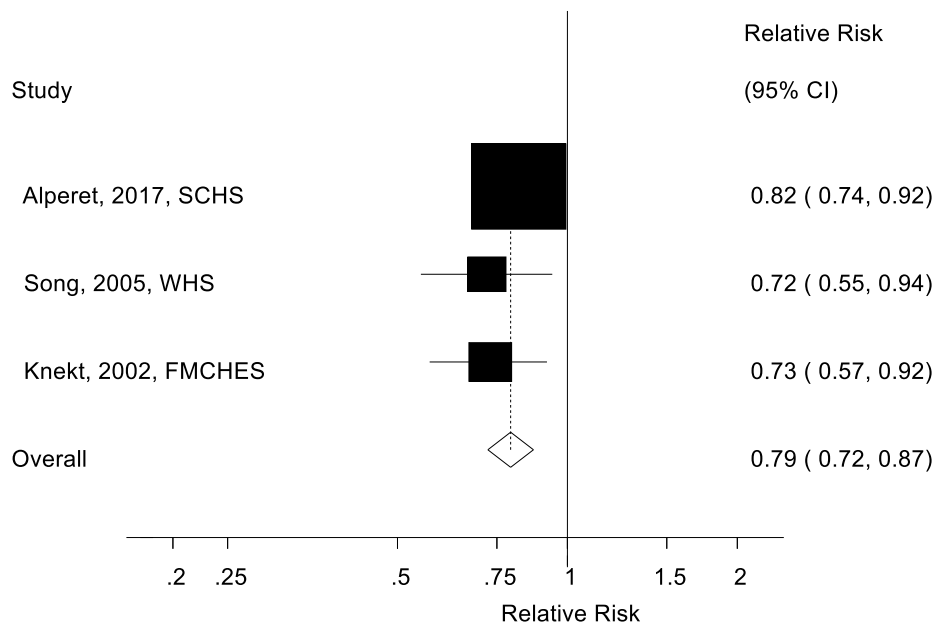

Supplemental Figure 2. Apples and type 2 diabetes, dose-response analysis per 100 g/d

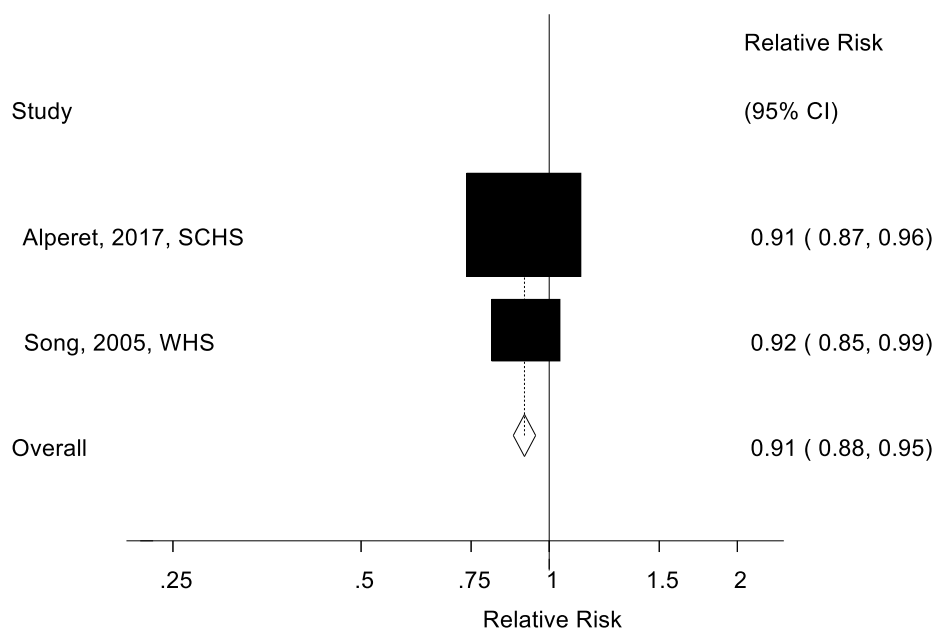

**Supplemental Figure 3.** Apples and type 2 diabetes, nonlinear dose-response analysis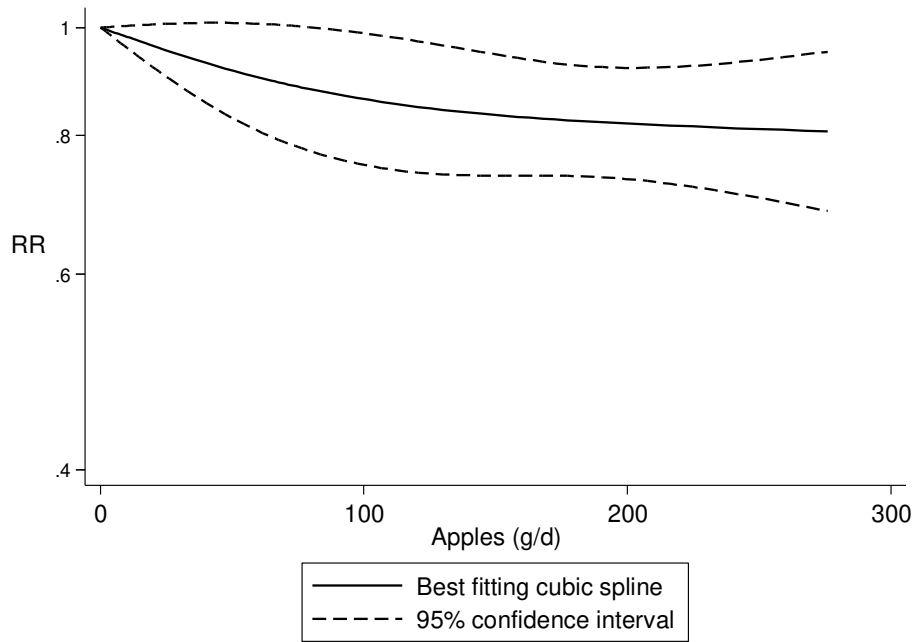

**Supplemental Figure 4.** Apples and pears and type 2 diabetes, high vs. low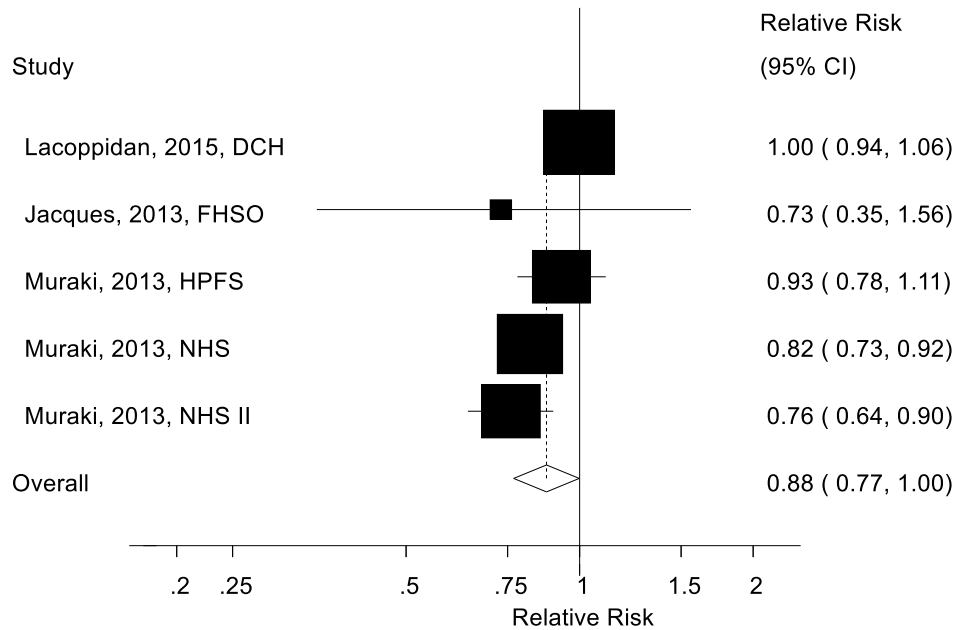**Supplemental Figure 5.** Apples and pears and type 2 diabetes, dose-response analysis per 100 g/d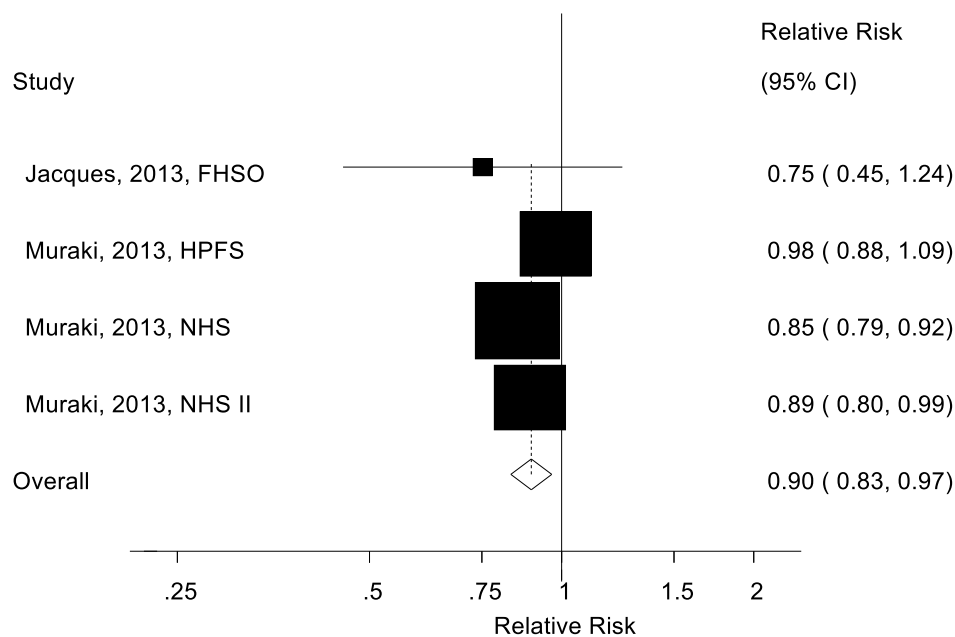

**Supplemental Figure 6.** Apples and pears and type 2 diabetes, nonlinear dose-response analysis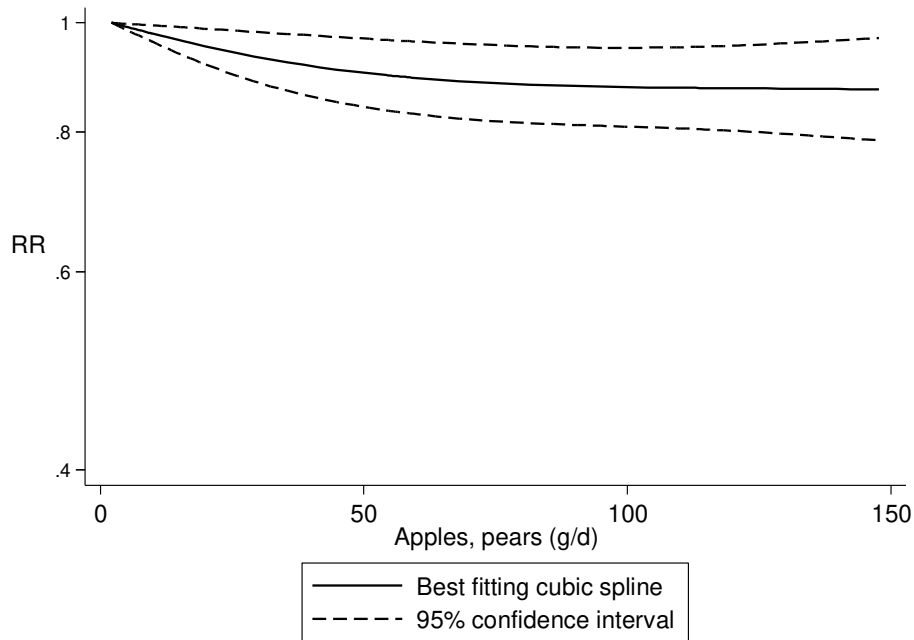

**Supplemental Figure 7.** Bananas and type 2 diabetes, high vs. low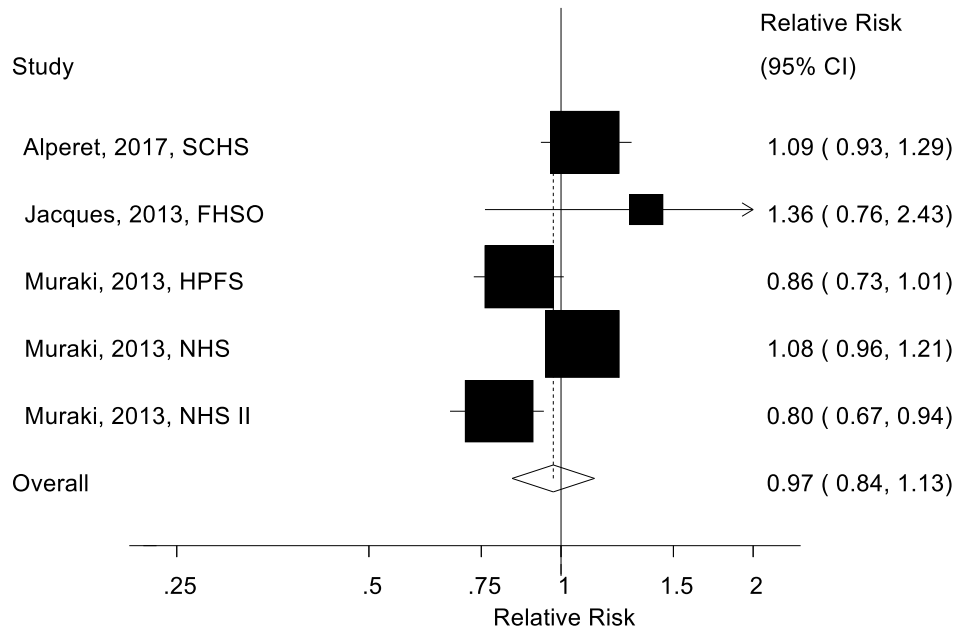**Supplemental Figure 8.** Bananas and type 2 diabetes, dose-response analysis per 100 g/d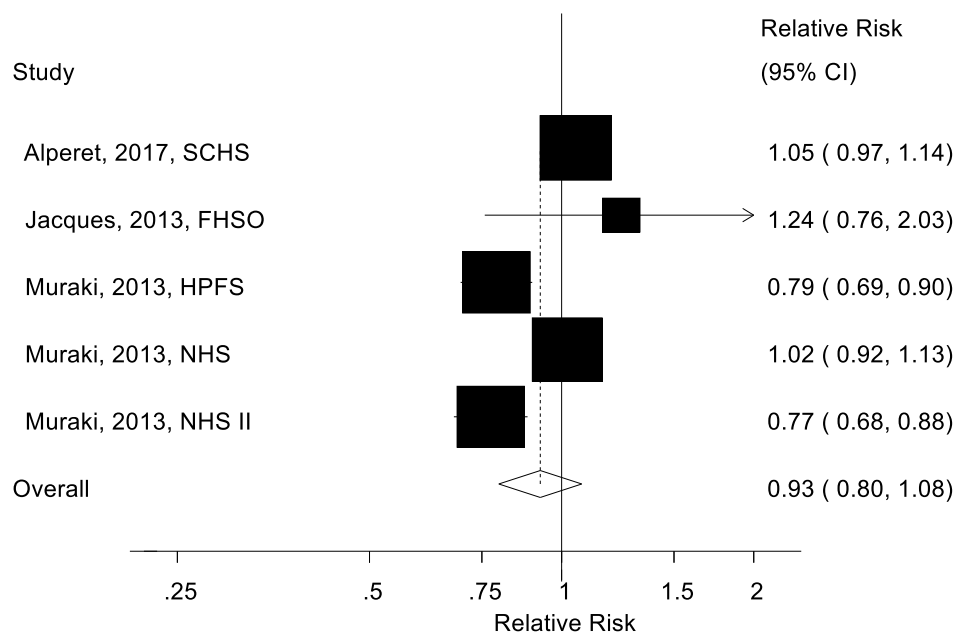



**Supplemental Figure 9.** Bananas and type 2 diabetes, nonlinear dose-response analysis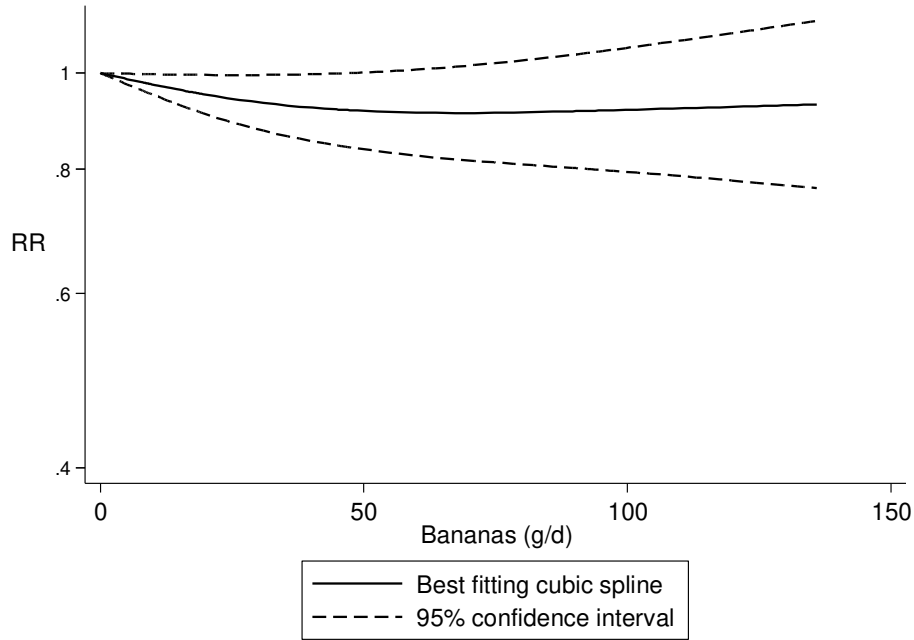

**Supplemental Figure 10.** Berries and type 2 diabetes, high vs. low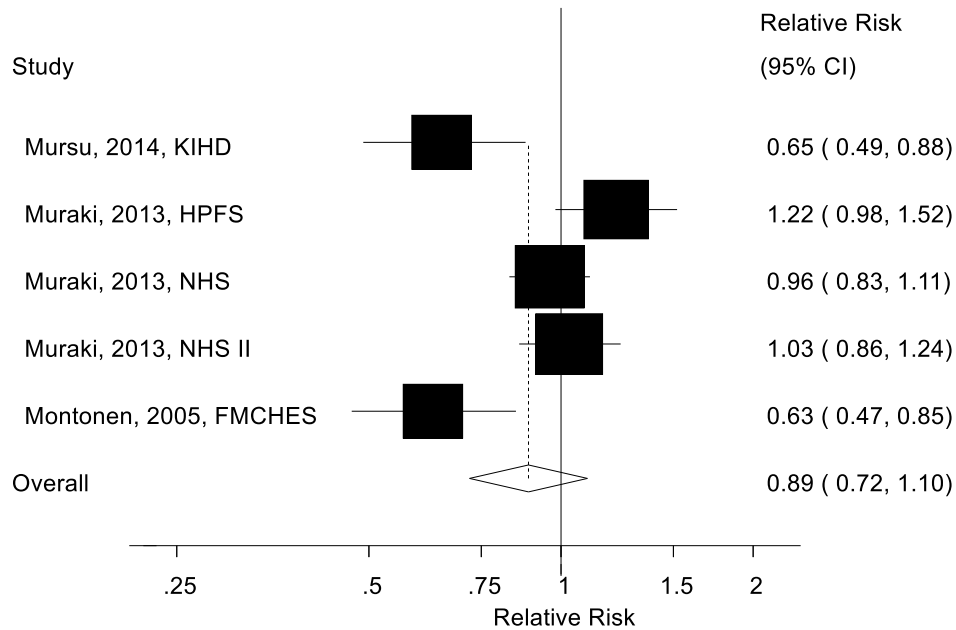**Supplemental Figure 11.** Berries and type 2 diabetes, dose-response analysis per 50 g/d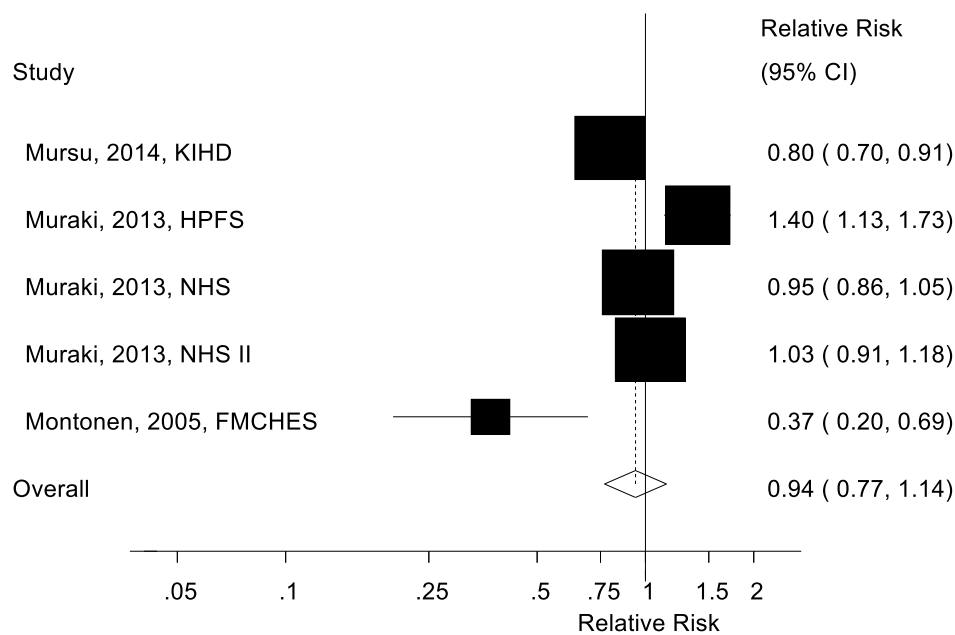

**Supplemental Figure 12.** Berries and type 2 diabetes, nonlinear dose-response analysis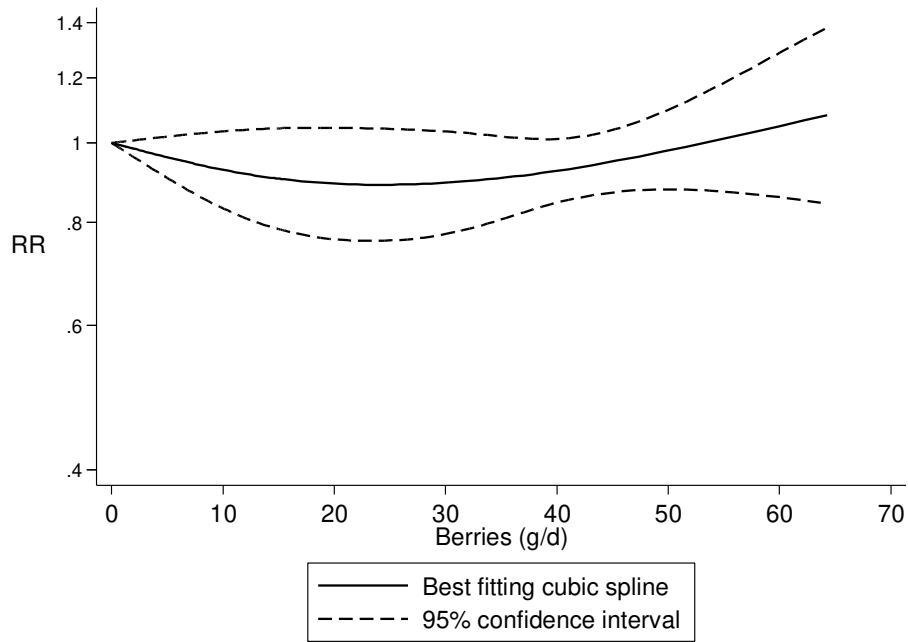

**Supplemental Figure 13.** Blueberries and type 2 diabetes, high vs. low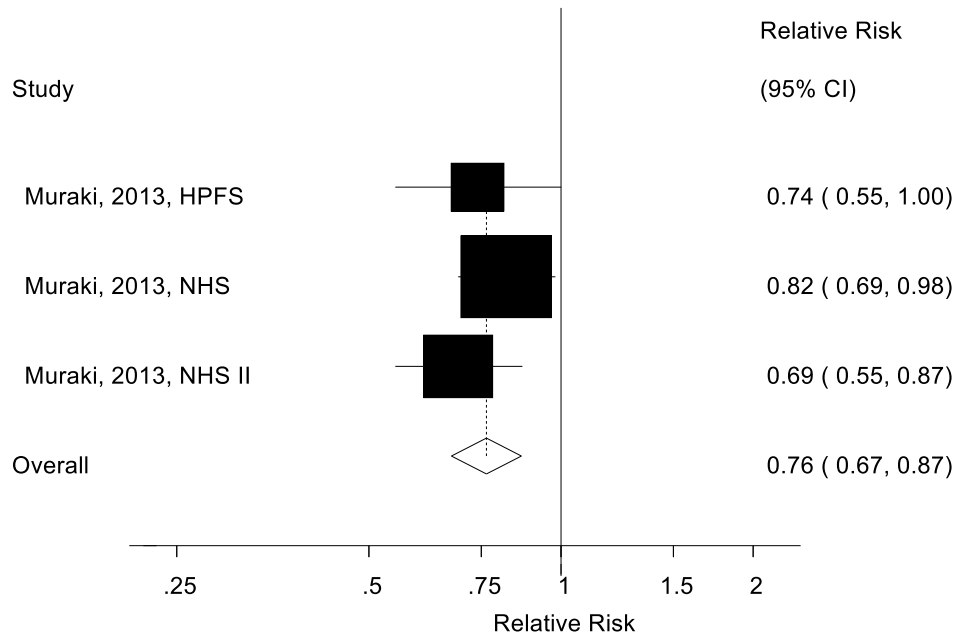**Supplemental Figure 14.** Blueberries and type 2 diabetes, dose-response analysis per 50 g/d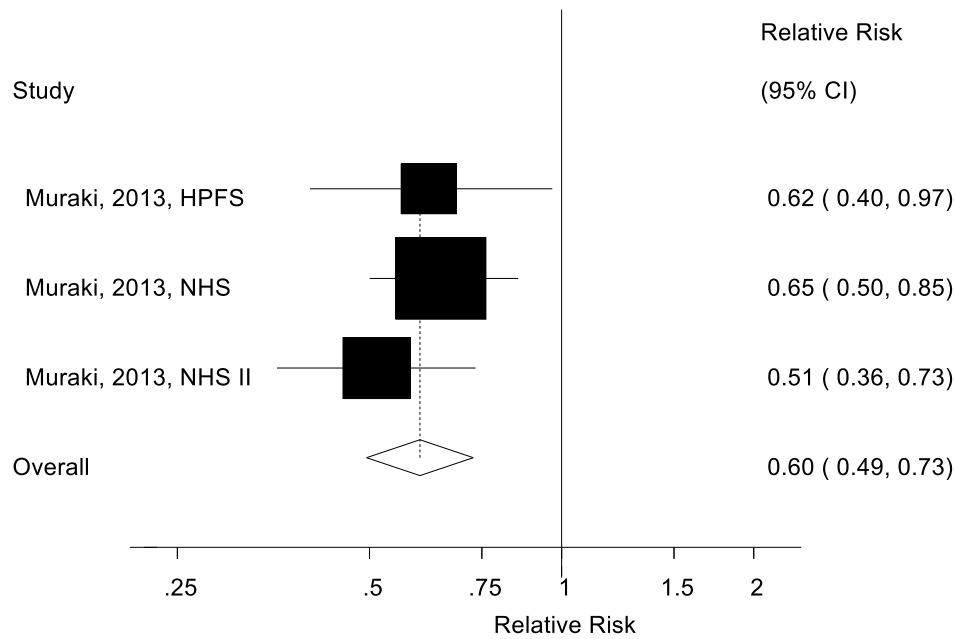

**Supplemental Figure 15.** Blueberries and type 2 diabetes, nonlinear dose-response analysis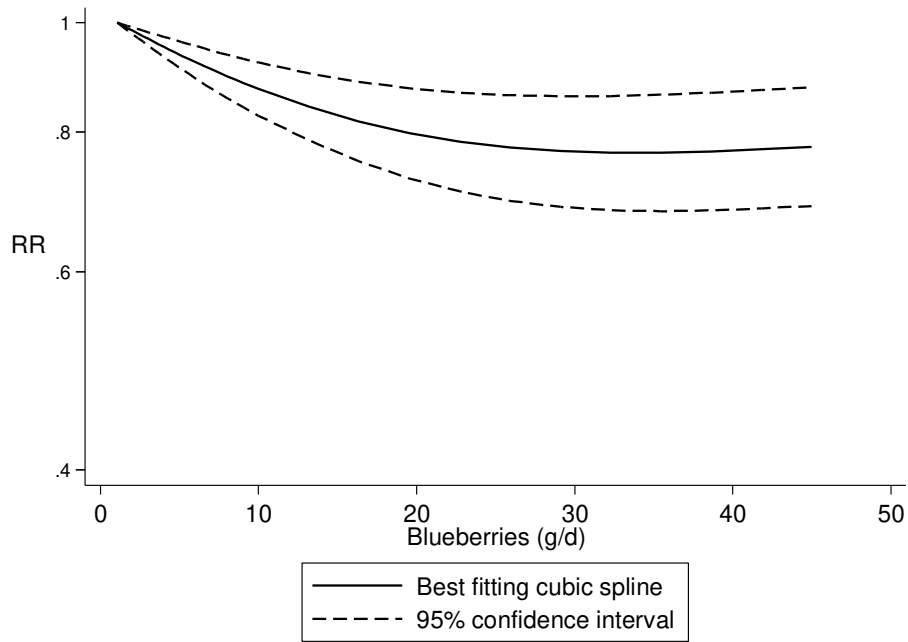

**Supplemental Figure 16.** Cantaloupe and type 2 diabetes, high vs. low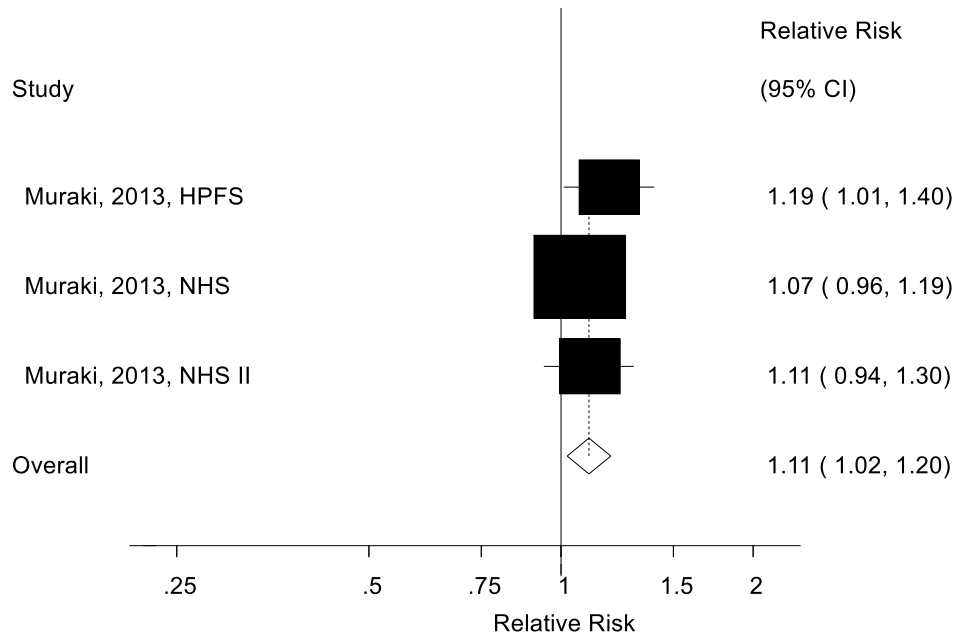**Supplemental Figure 17.** Cantaloupe and type 2 diabetes, dose-response analysis per 100 g/d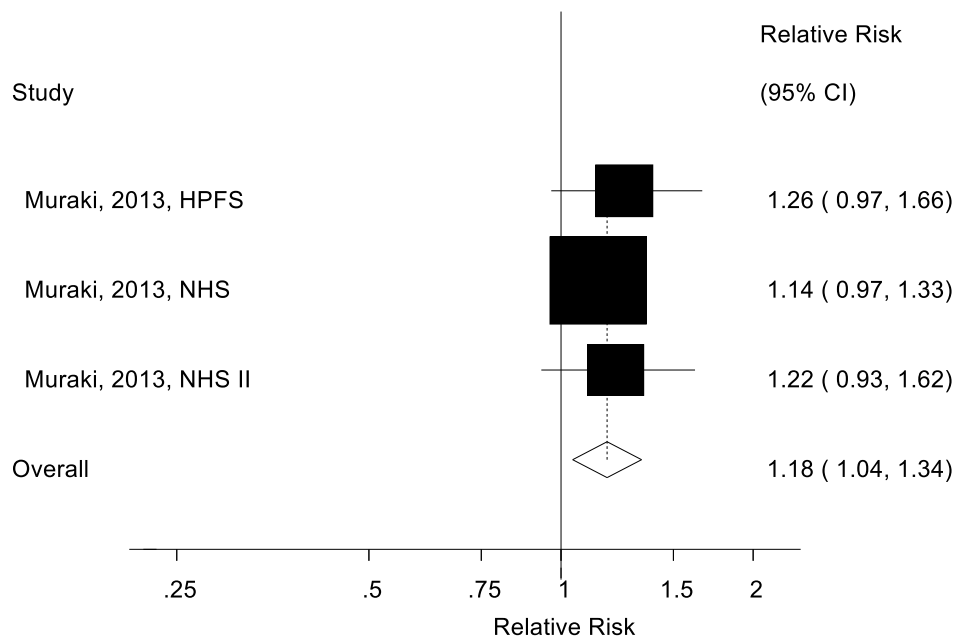

**Supplemental Figure 18.** Cantaloupe and type 2 diabetes, nonlinear dose-response analysis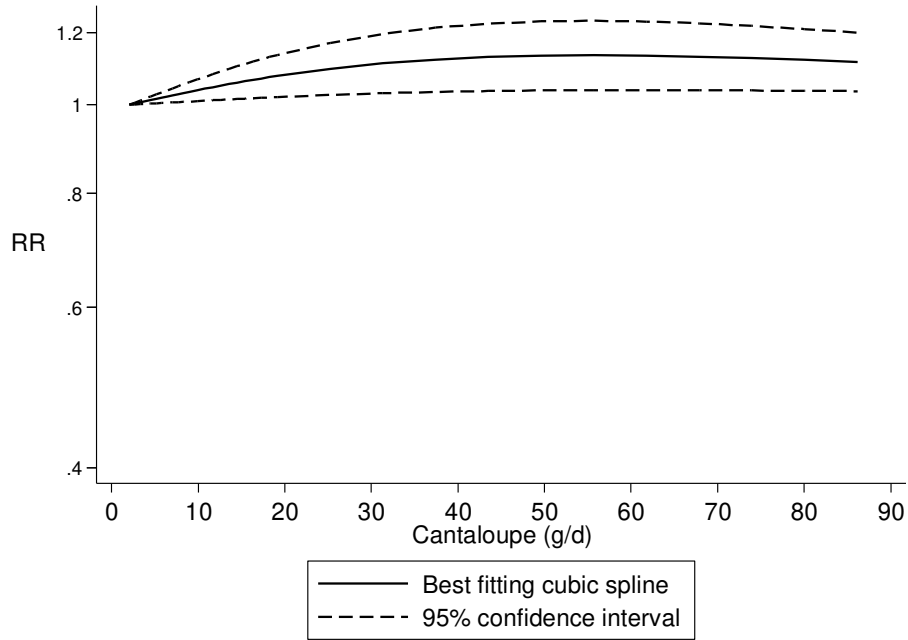

**Supplemental Figure 19.** Citrus fruits and type 2 diabetes, high vs. low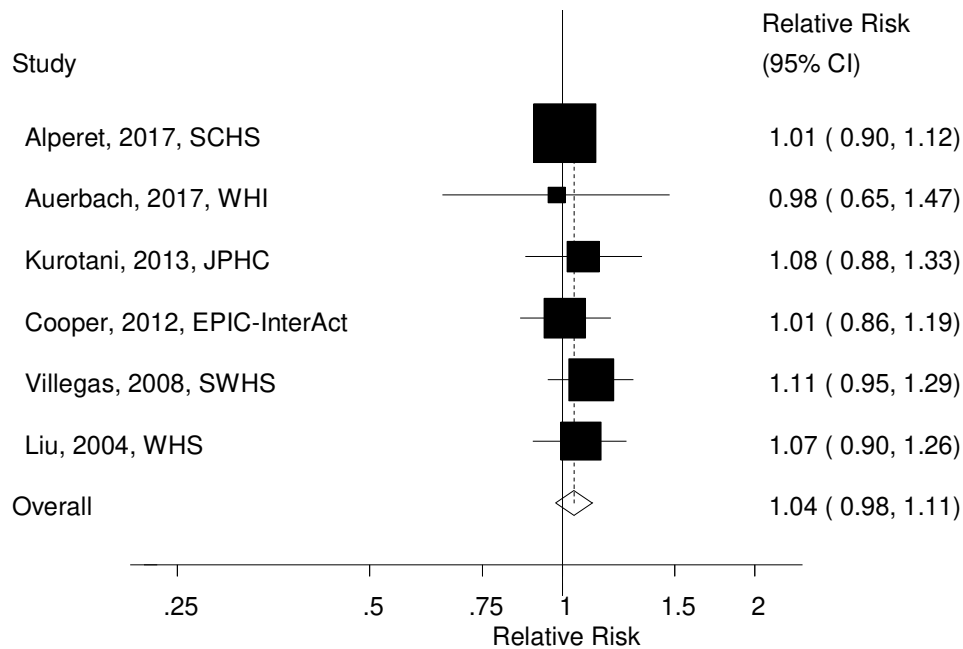**Supplemental Figure 20.** Citrus fruits and type 2 diabetes, dose-response analysis per 100 g/d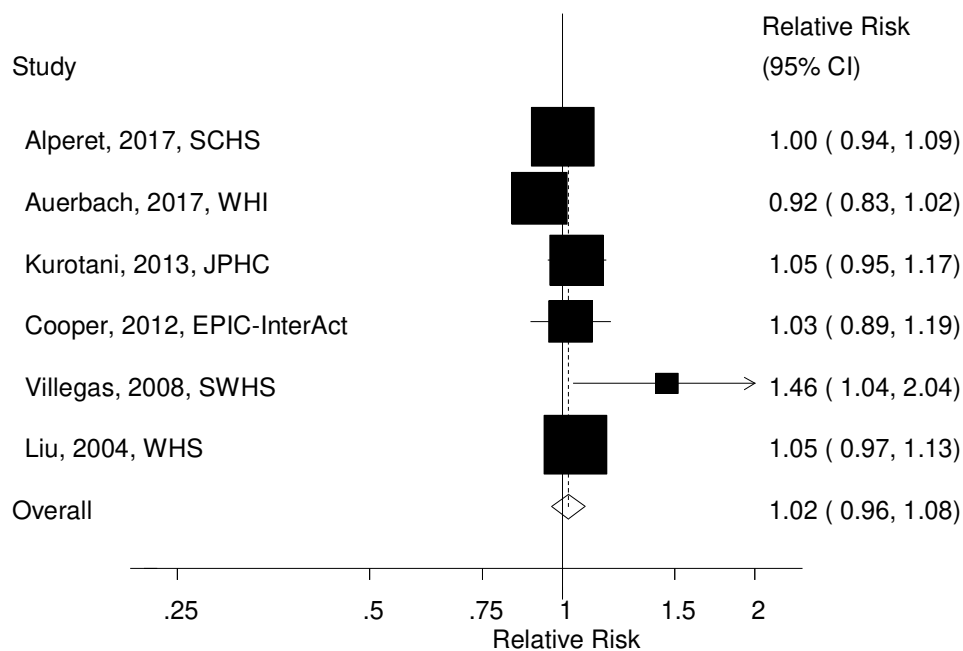



**Supplemental Figure 21.** Citrus fruits and type 2 diabetes, nonlinear dose-response analysis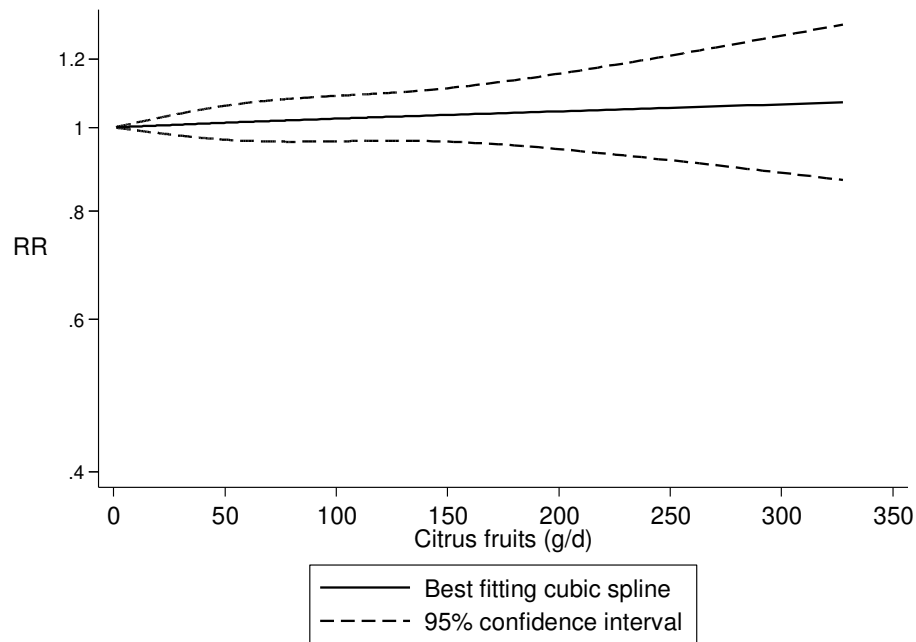

**Supplemental Figure 22.** Fruit drinks and type 2 diabetes, high vs. low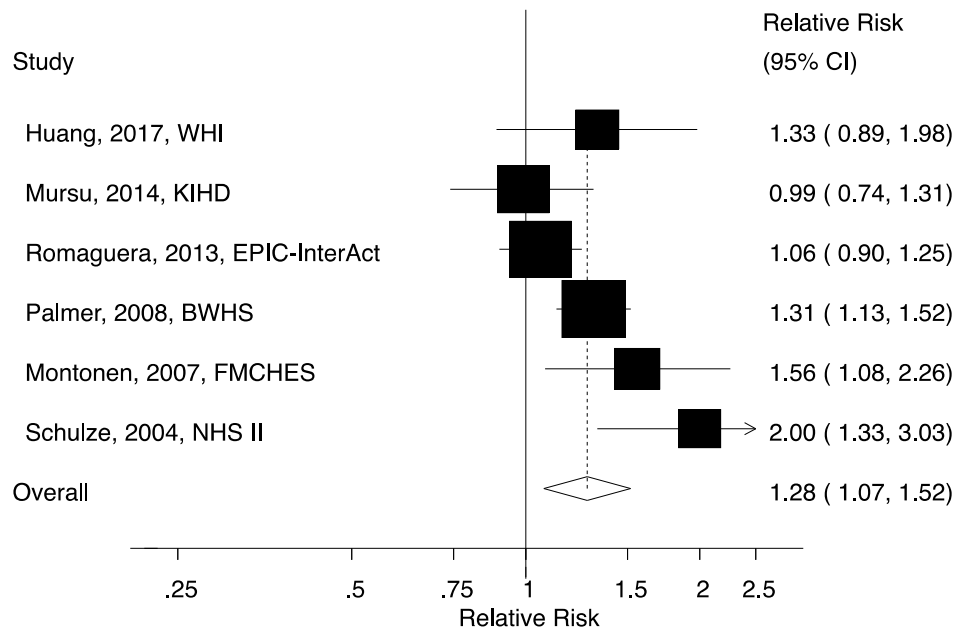**Supplemental Figure 23.** Fruit drinks and type 2 diabetes, dose-response analysis per 250 g/d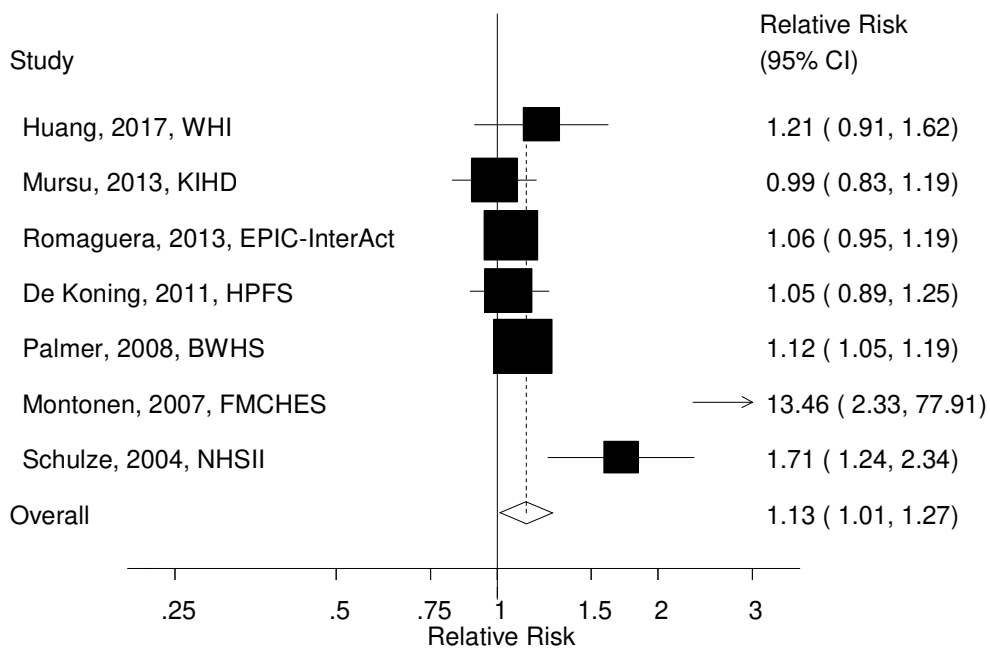

**Supplemental Figure 24.** Fruit drinks and type 2 diabetes, nonlinear dose-response analysis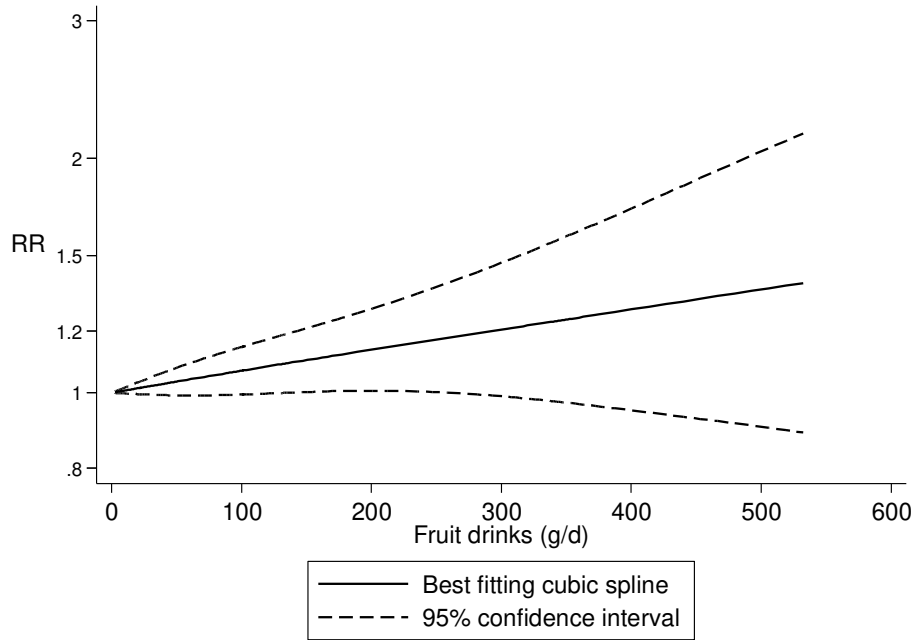

**Supplemental Figure 25.** Fruit juice and type 2 diabetes, high vs. low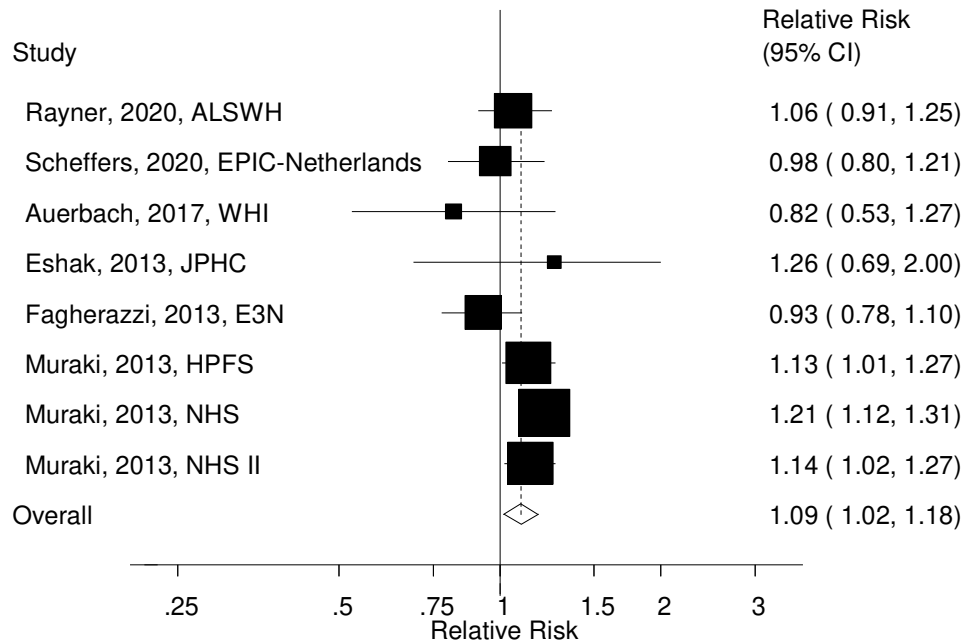**Supplemental Figure 26.** Fruit juice and type 2 diabetes, dose-response analysis per 250 g/d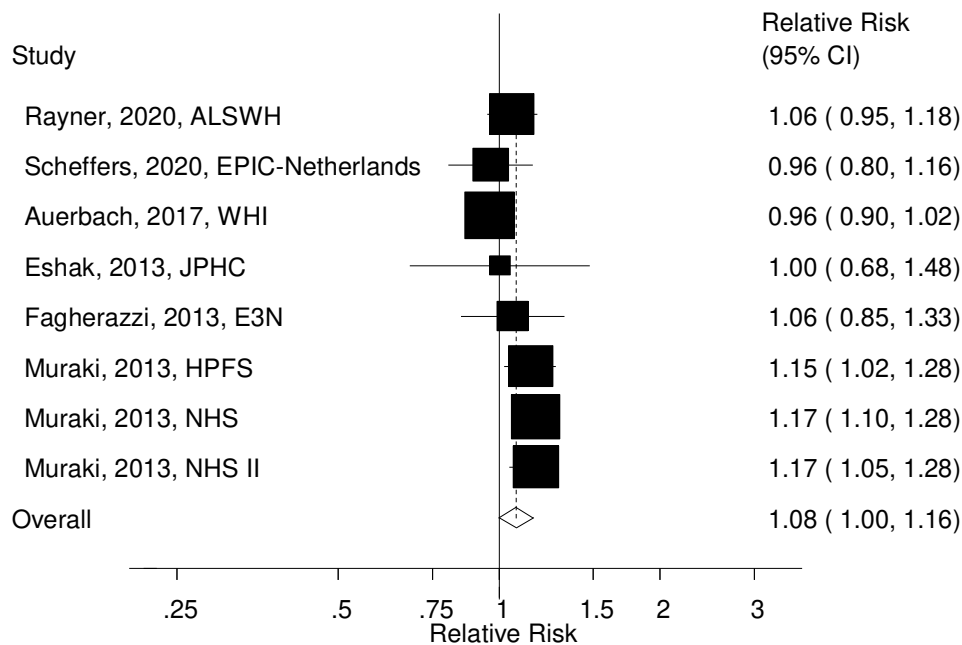

**Supplemental Figure 27.** Fruit juice and type 2 diabetes, nonlinear dose-response analysis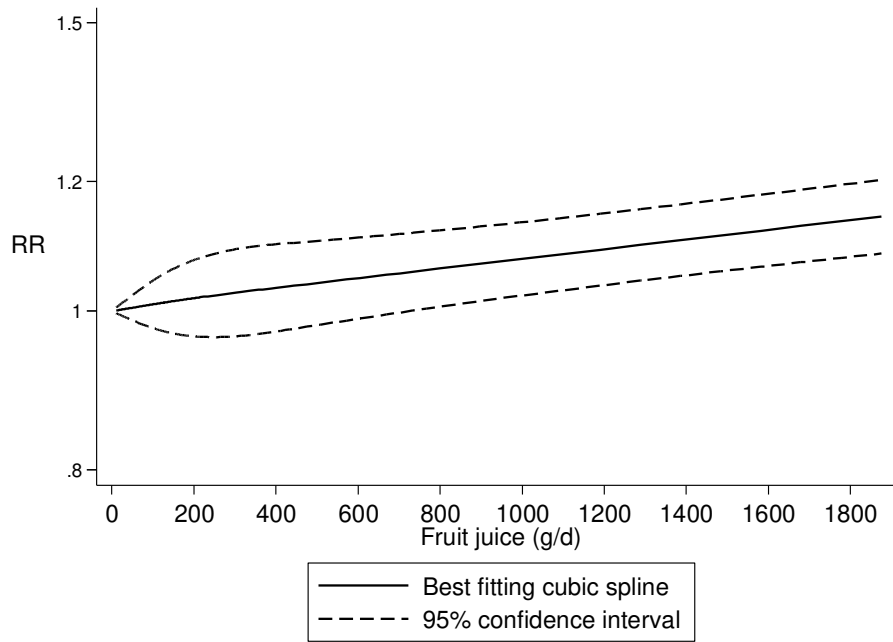

**Supplemental Figure 28.** 100% fruit juice and type 2 diabetes, high vs. low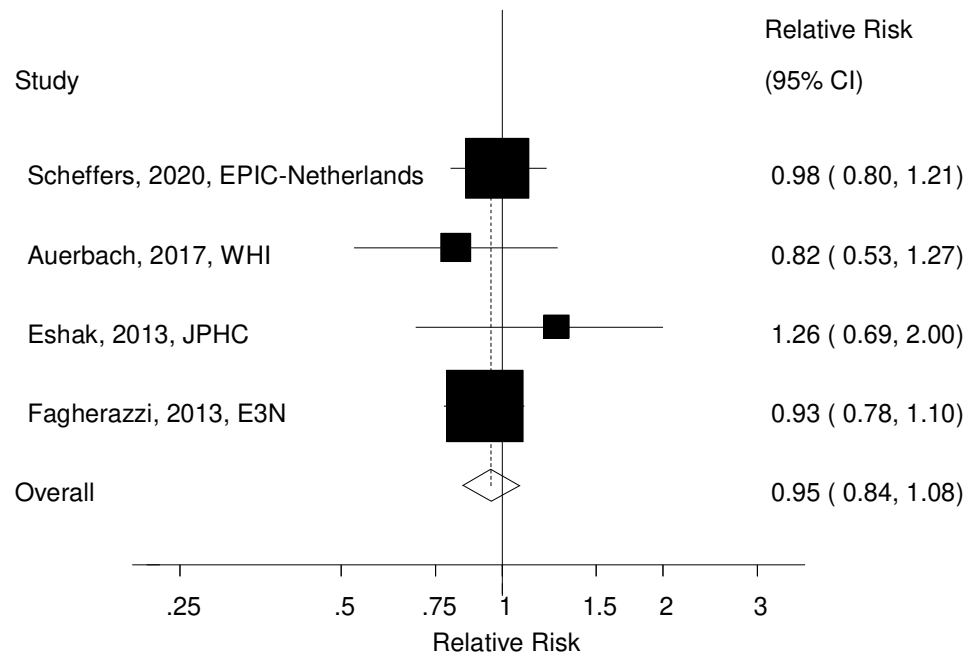**Supplemental Figure 29.** 100% fruit juice and type 2 diabetes, dose-response analysis per 250 g/d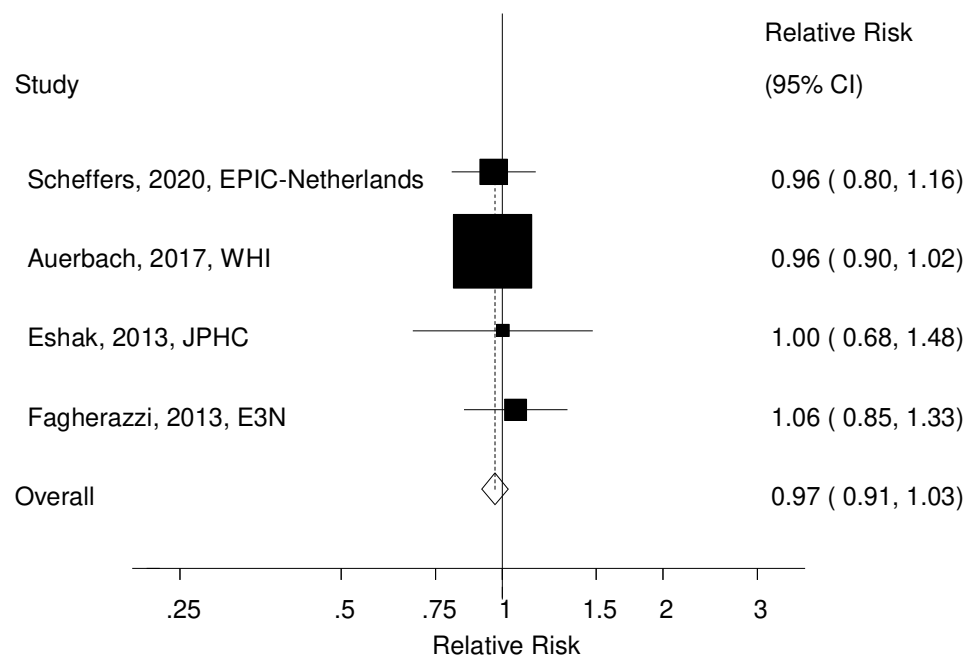

**Supplemental Figure 30.** 100% fruit juice and type 2 diabetes, nonlinear dose-response analysis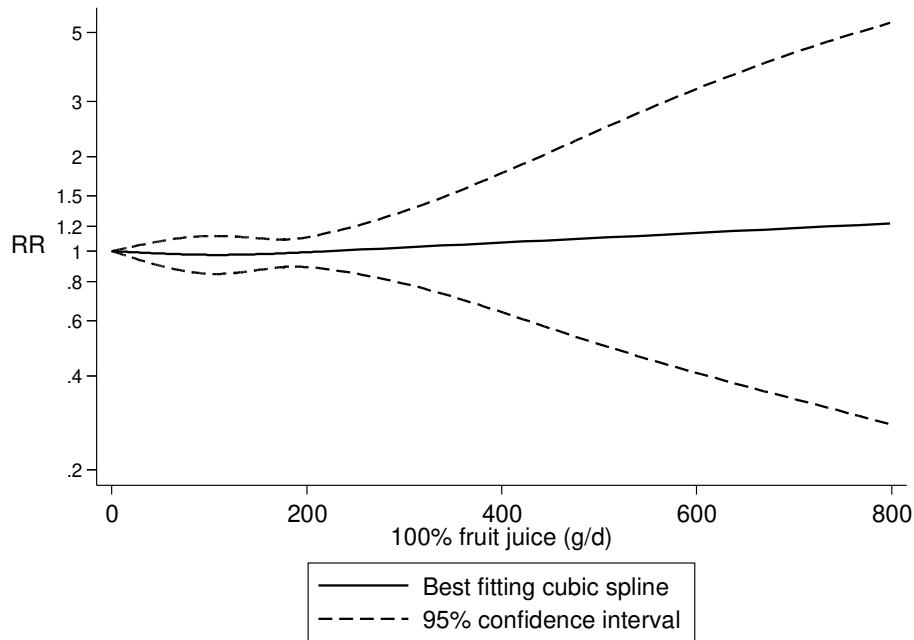

**Supplemental Figure 31.** Grapefruit and type 2 diabetes, high vs. low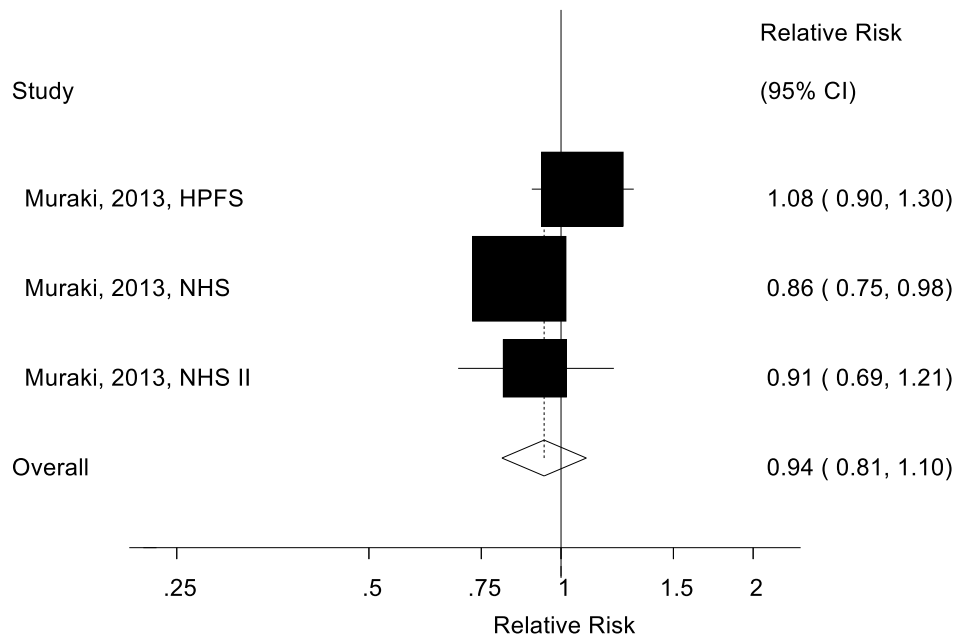**Supplemental Figure 32.** Grapefruit and type 2 diabetes, dose-response analysis per 100 g/d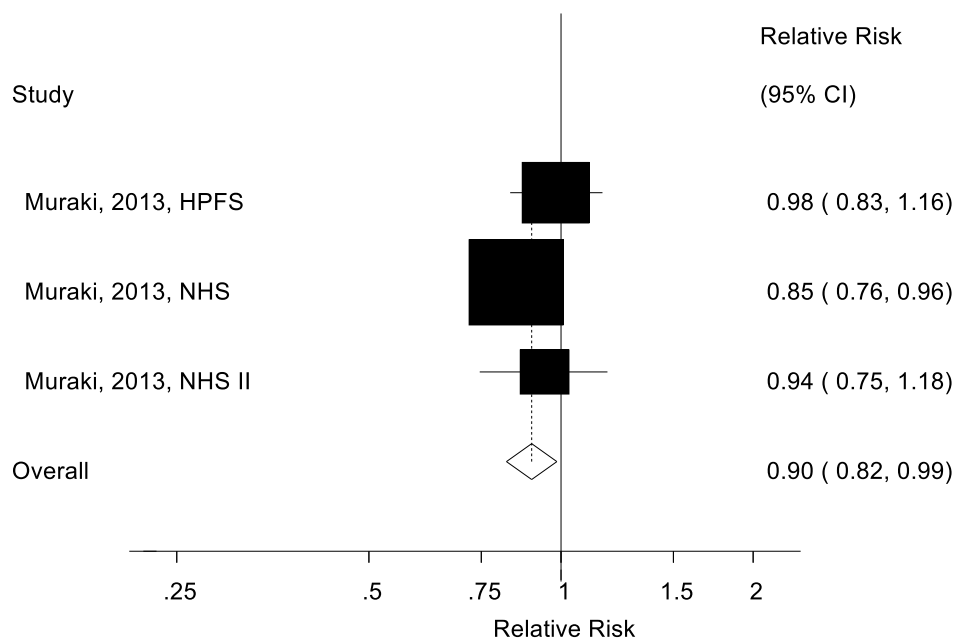



**Supplemental Figure 33.** Grapefruit and type 2 diabetes, nonlinear dose-response analysis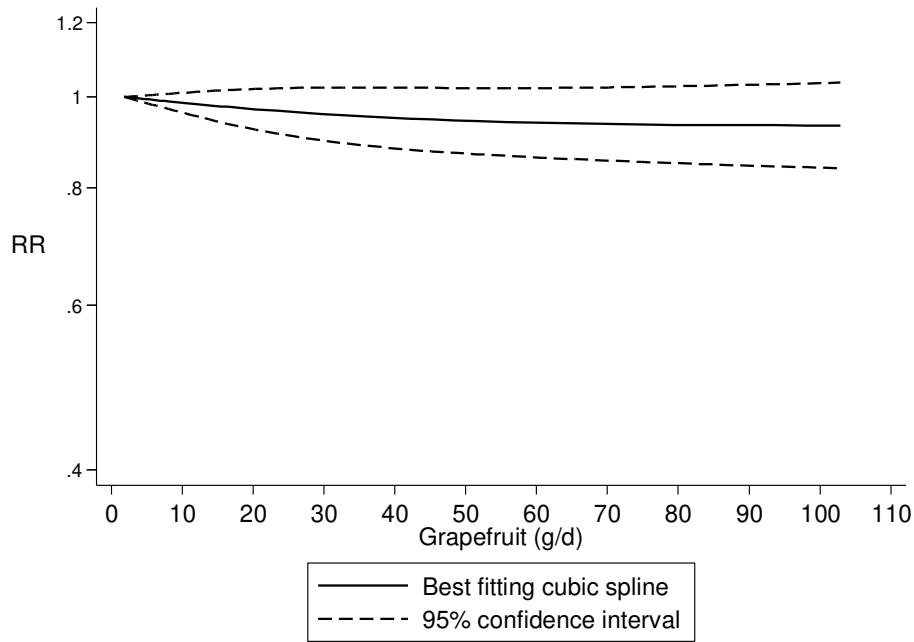

**Supplemental Figure 34.** Grapes and raisins and type 2 diabetes, high vs. low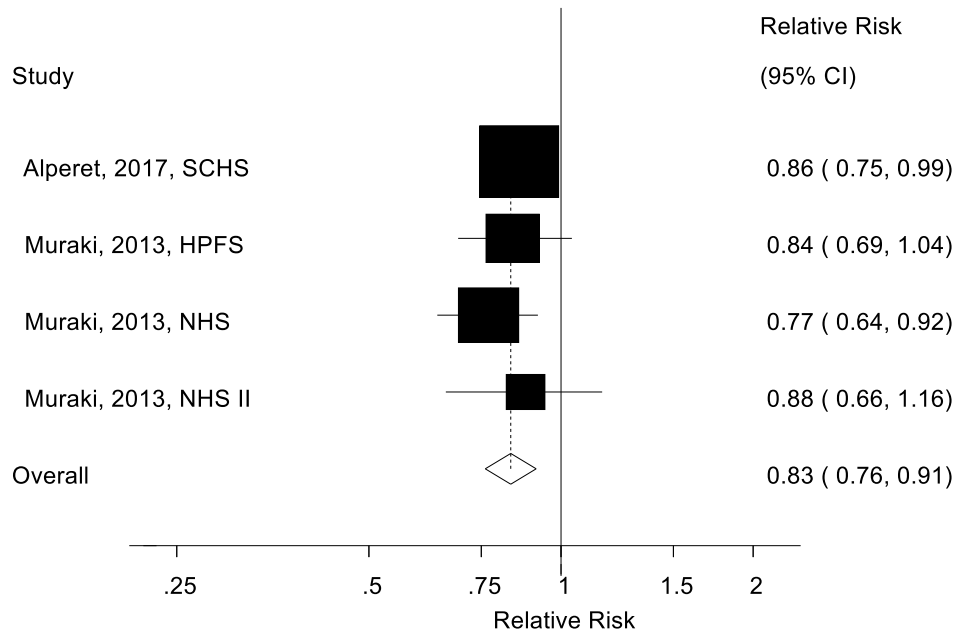**Supplemental Figure 35.** Grapes and raisins and type 2 diabetes, dose-response analysis per 50 g/d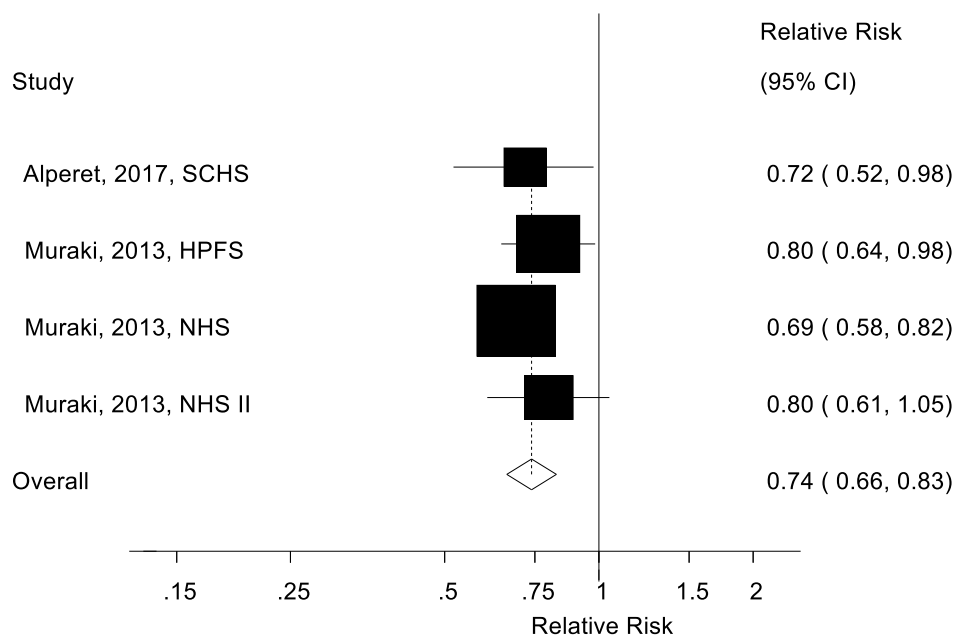

**Supplemental Figure 36.** Grapes and raisins and type 2 diabetes, nonlinear dose-response analysis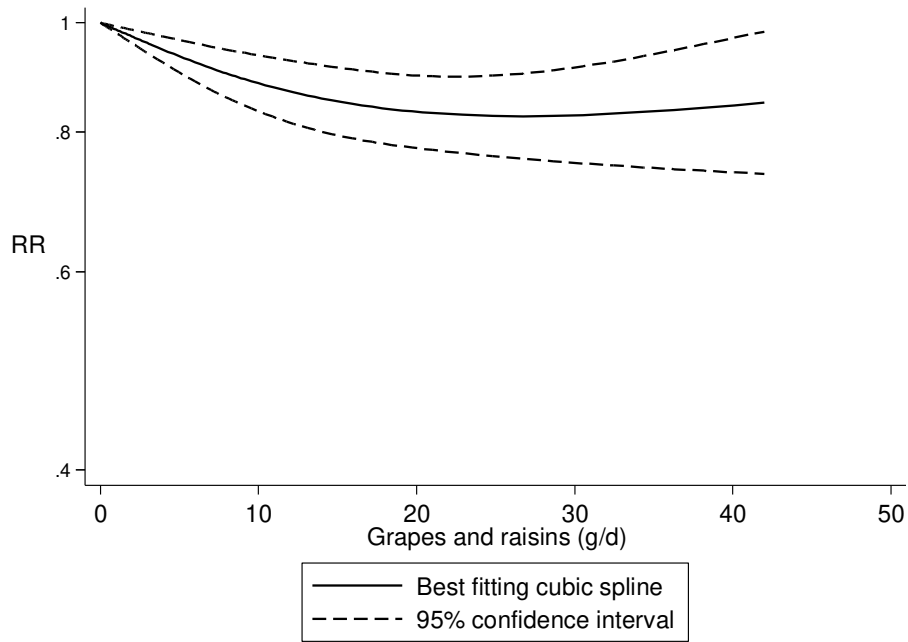

**Supplemental Figure 37.** Oranges and type 2 diabetes, high vs. low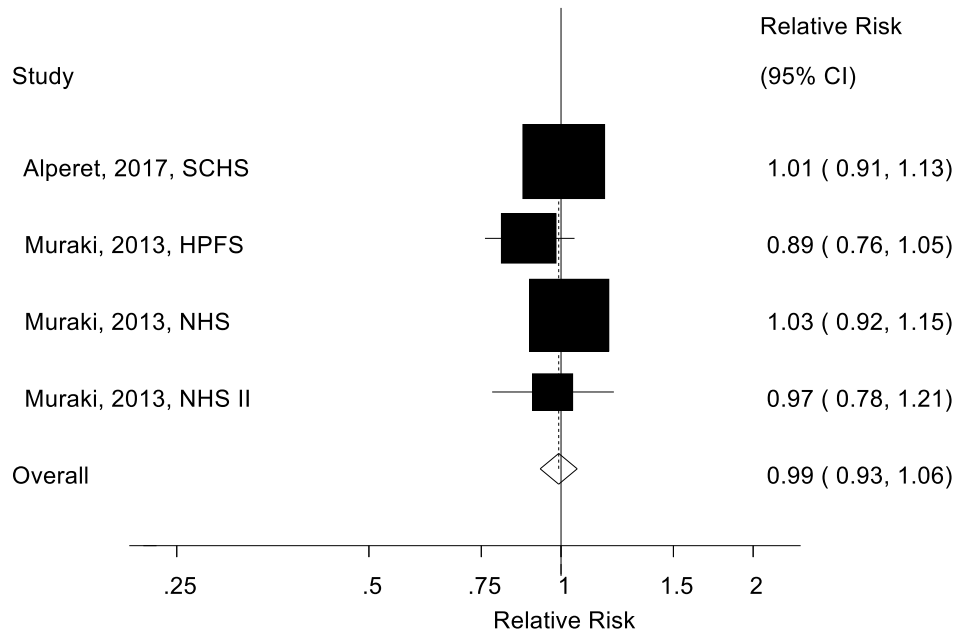**Supplemental Figure 38.** Oranges and type 2 diabetes, dose-response analysis per 100 g/d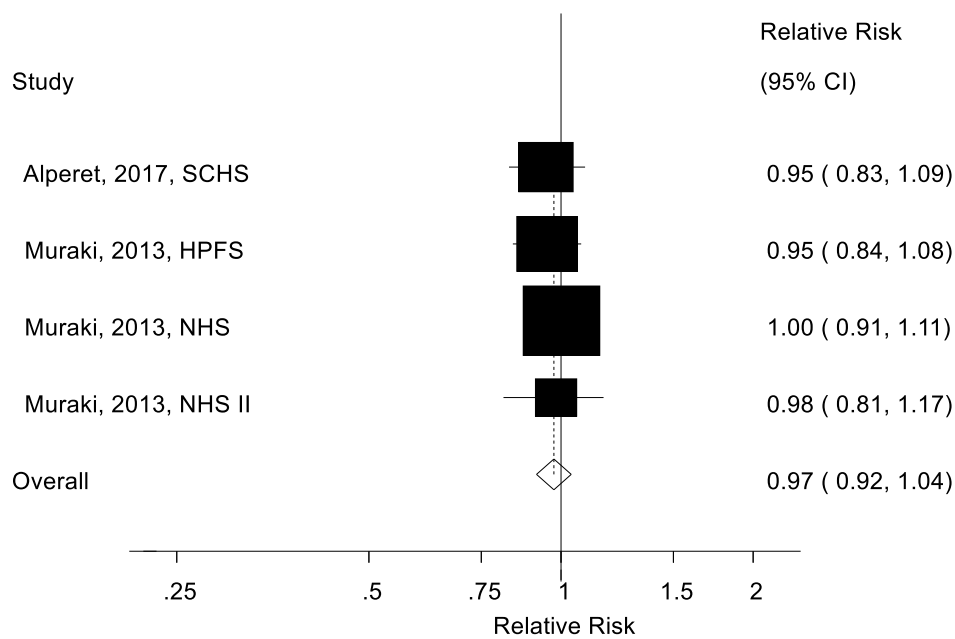

**Supplemental Figure 39.** Oranges and type 2 diabetes, nonlinear dose-response analysis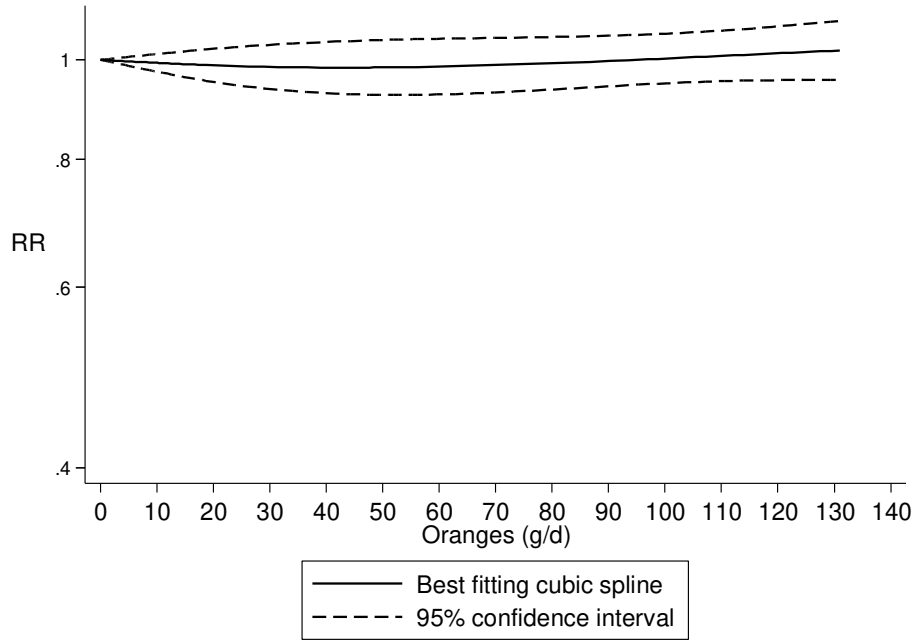

**Supplemental Figure 40.** Peaches, plums and apricots and type 2 diabetes, high vs. low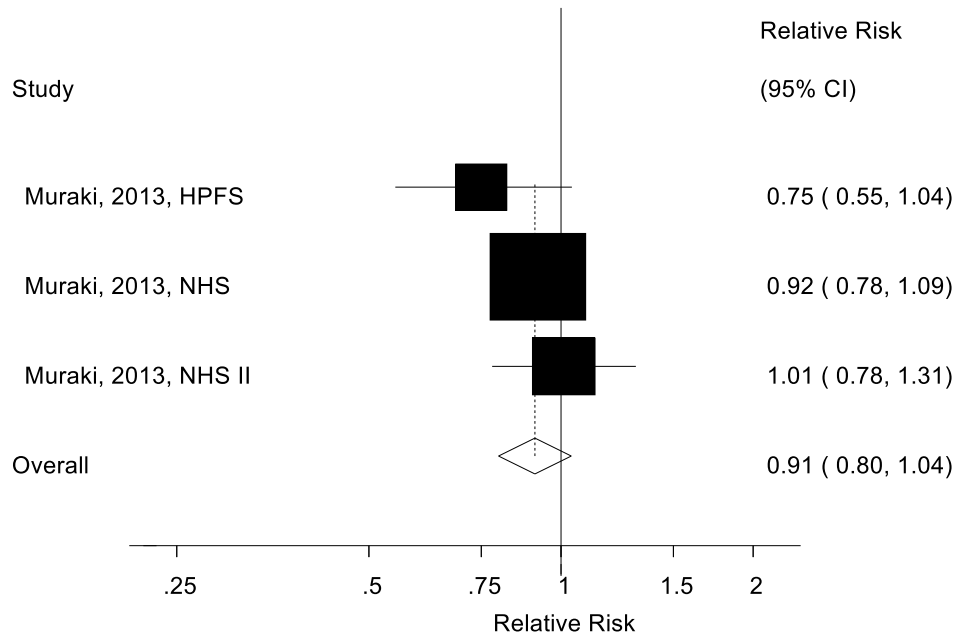**Supplemental Figure 41.** Peaches, plums and apricots and type 2 diabetes, dose-response analysis per 100 g/d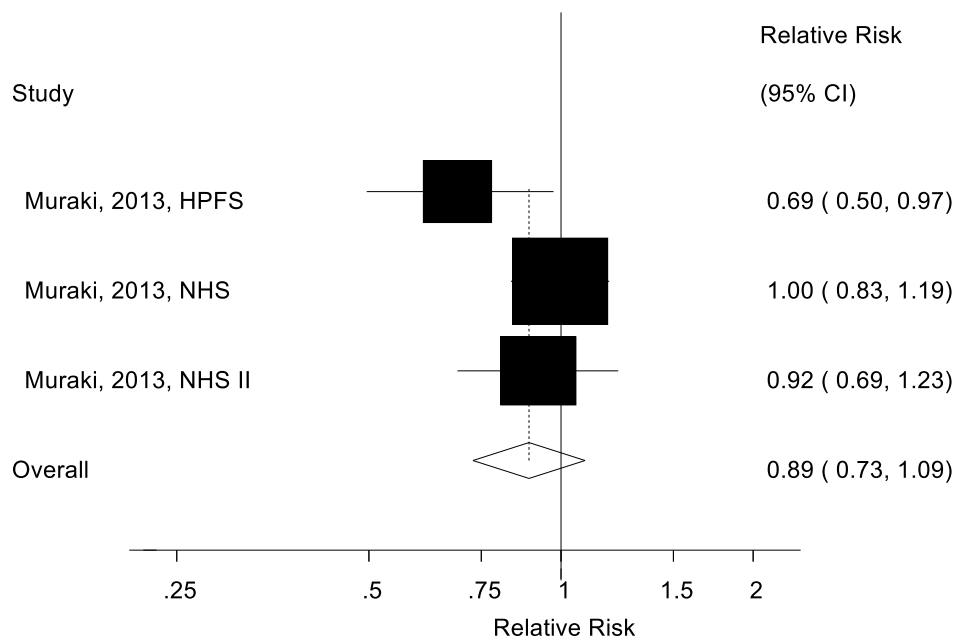

**Supplemental Figure 42.** Peaches, plums and apricots and type 2 diabetes, nonlinear dose-response analysis

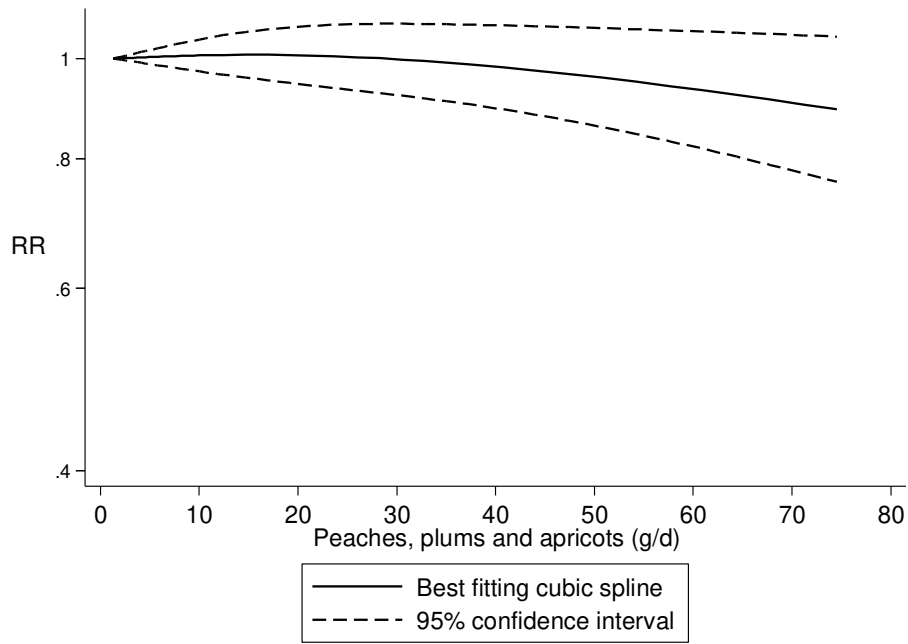

**Supplemental Figure 43.** Prunes and type 2 diabetes, high vs. low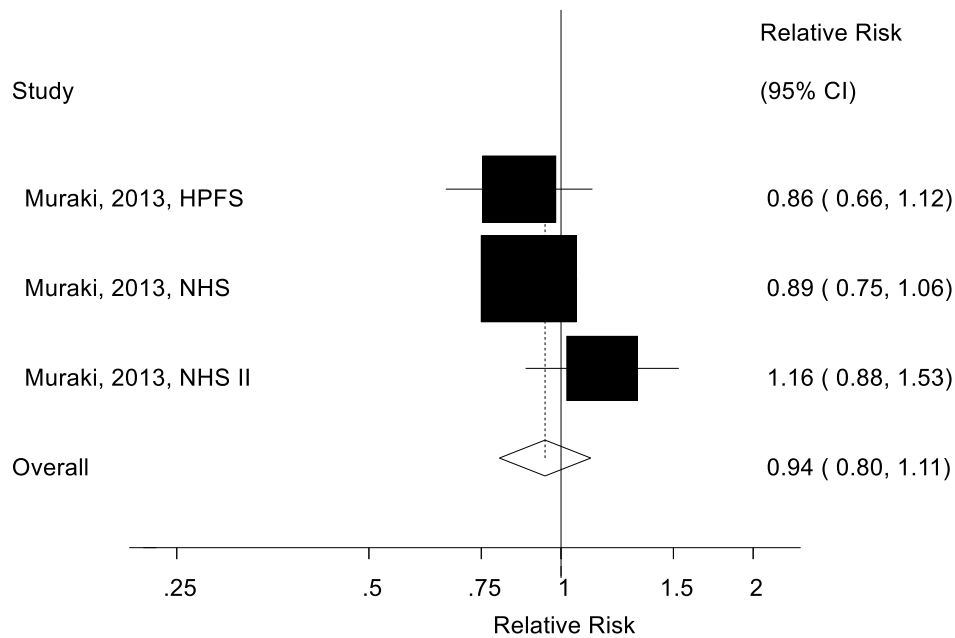**Supplemental Figure 44.** Prunes and type 2 diabetes, dose-response analysis per 100 g/d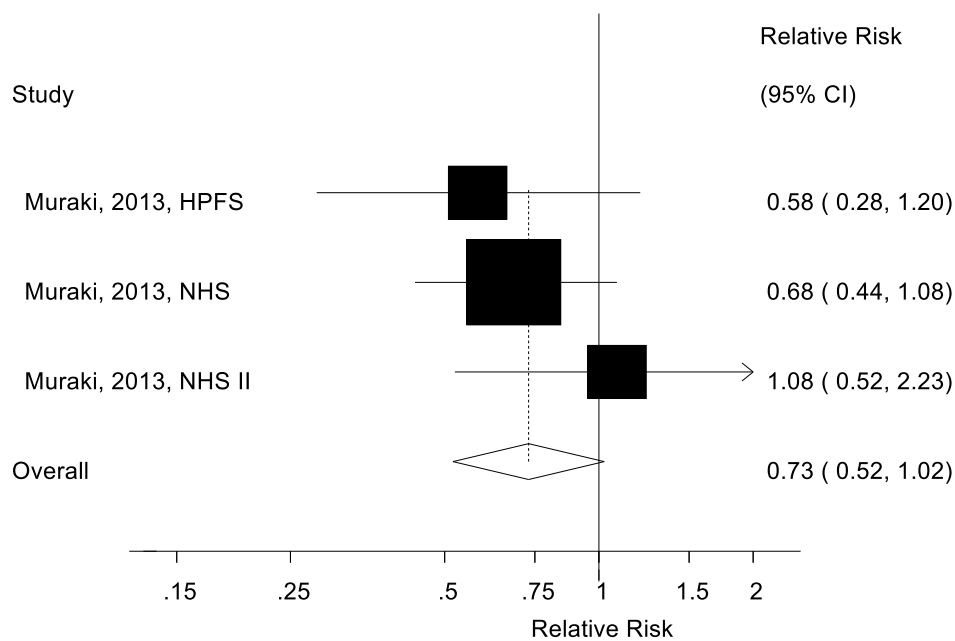



**Supplemental Figure 45.** Prunes and type 2 diabetes, nonlinear dose-response analysis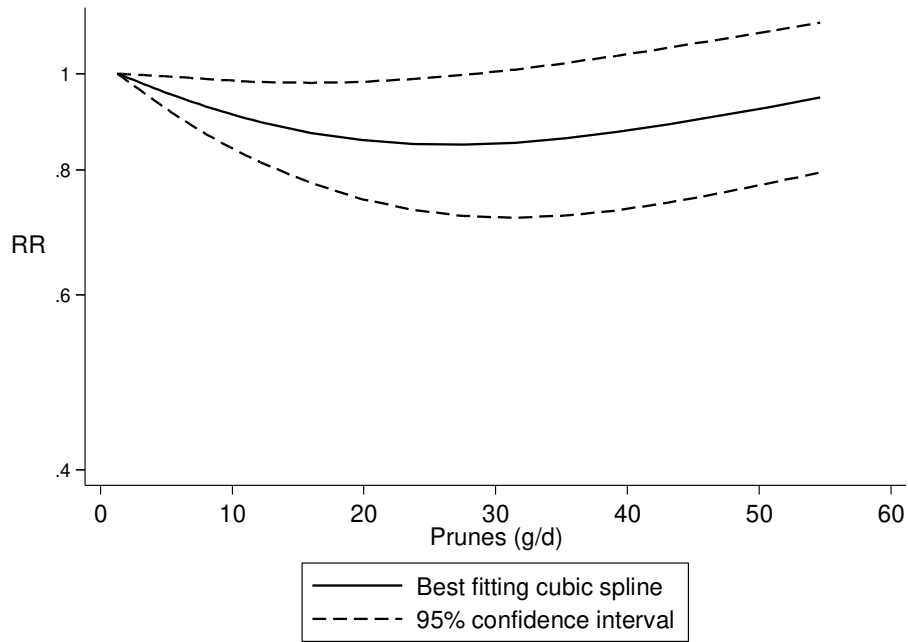

**Supplemental Figure 46.** Strawberries and type 2 diabetes, high vs. low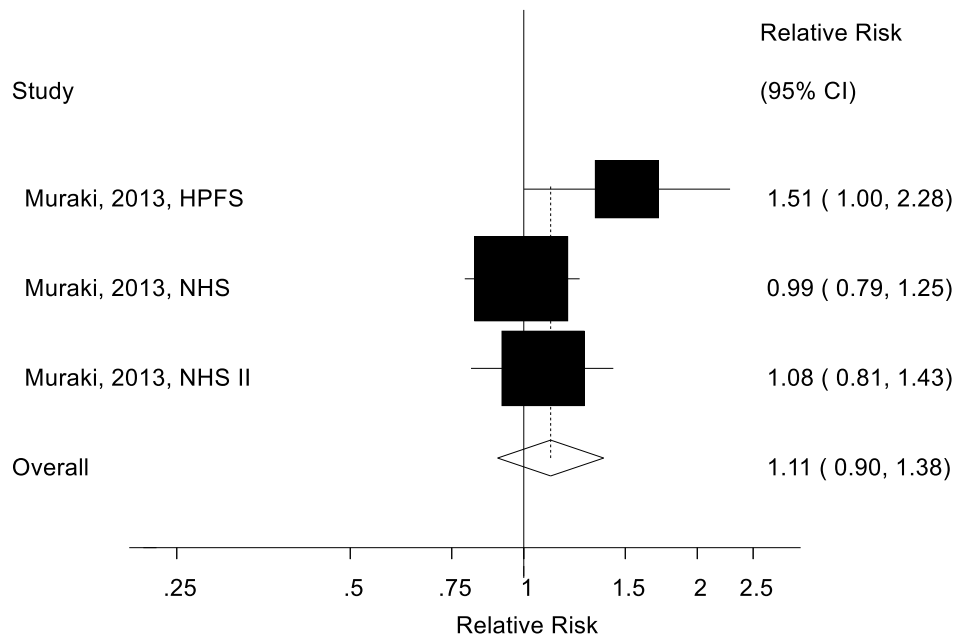**Supplemental Figure 47.** Strawberries and type 2 diabetes, dose-response analysis per 50 g/d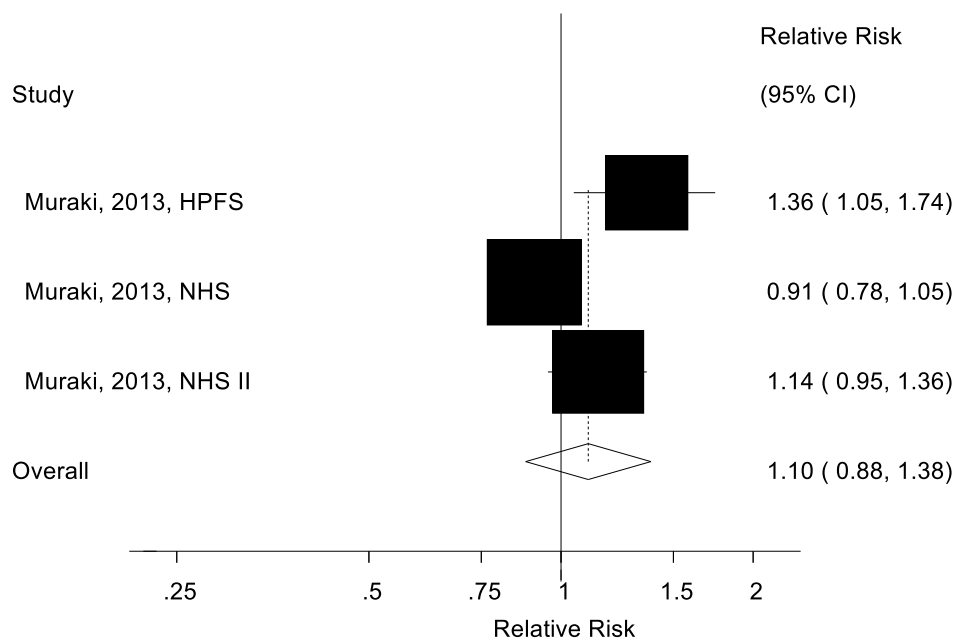

**Supplemental Figure 48.** Strawberries and type 2 diabetes, nonlinear dose-response analysis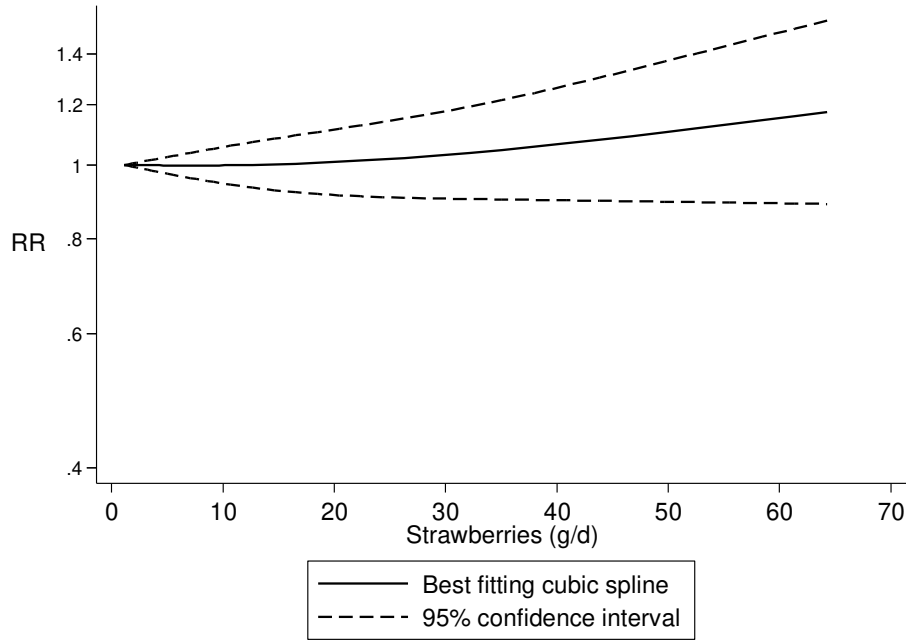

**Supplemental Figure 49.** Watermelon and type 2 diabetes, high vs. low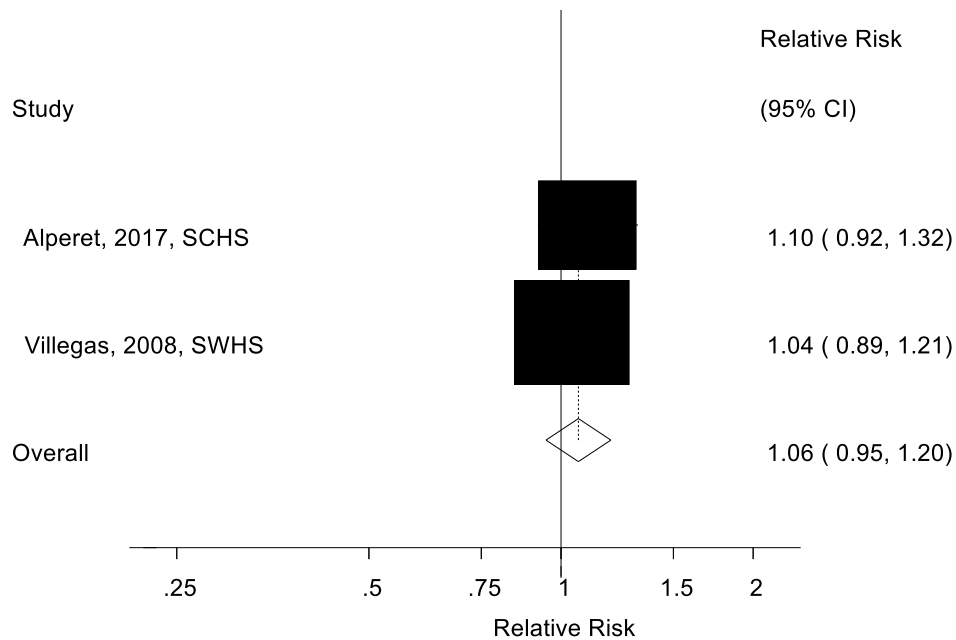**Supplemental Figure 50.** Watermelon and type 2 diabetes, dose-response analysis per 100 g/d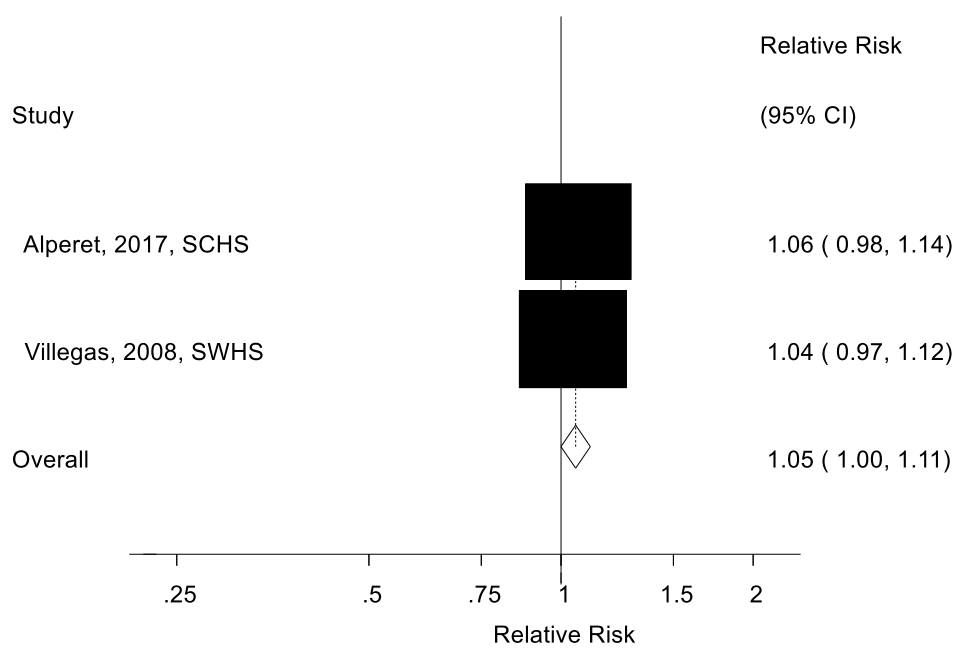

**Supplemental Figure 51.** Watermelon and type 2 diabetes, nonlinear dose-response analysis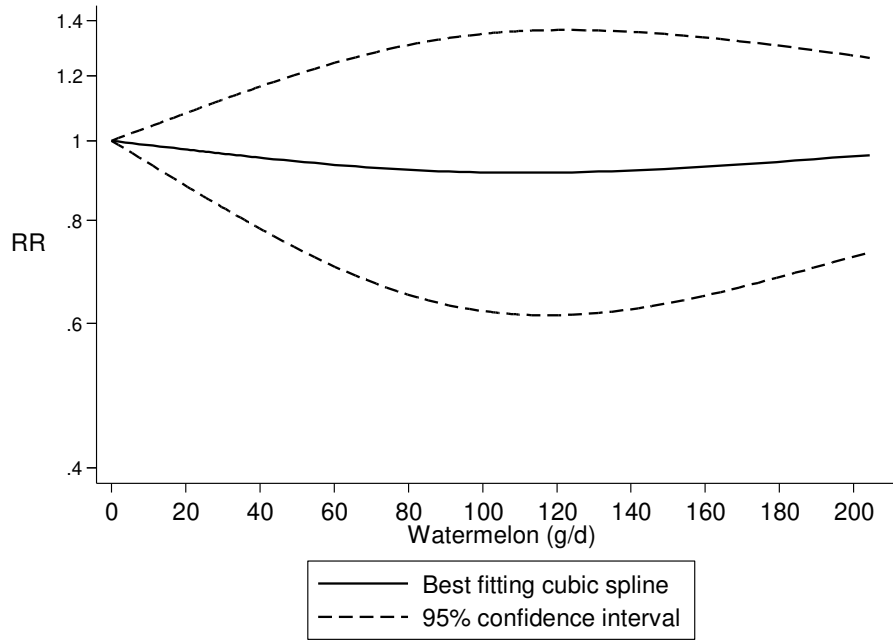

## Supplemental Figures of subtypes of vegetables

**Supplemental Figure 52.** Allium vegetables and type 2 diabetes, high vs. low

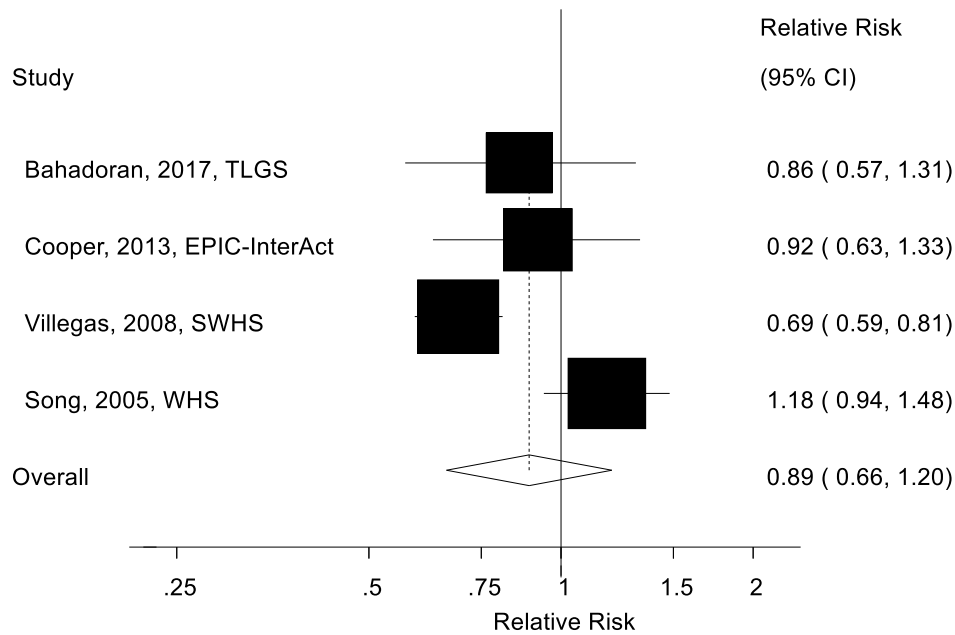

**Supplemental Figure 53.** Allium vegetables and type 2 diabetes, dose-response analysis per 100 g/d

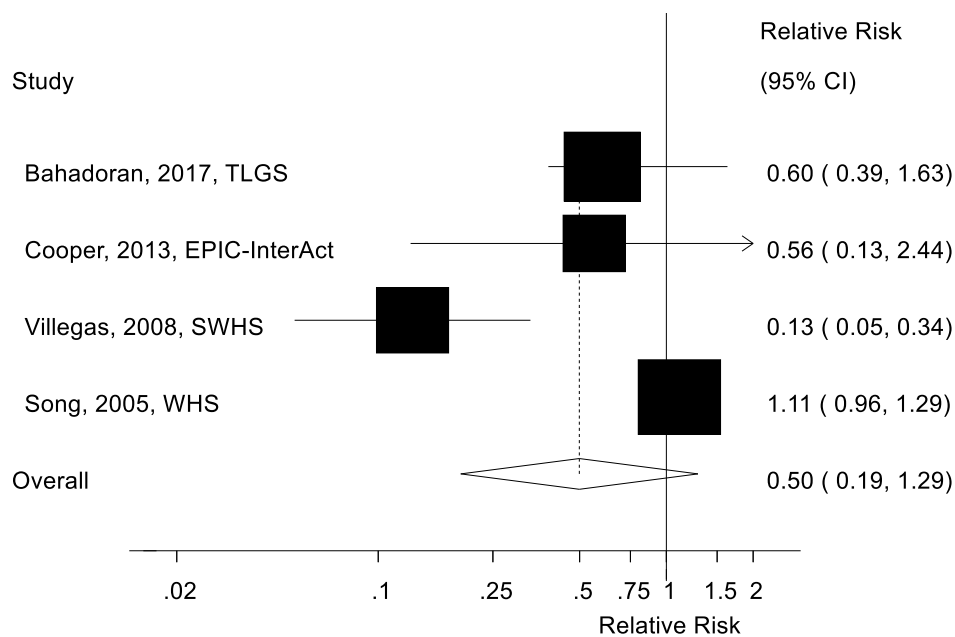

**Supplemental Figure 54.** Allium vegetables and type 2 diabetes, nonlinear dose-response analysis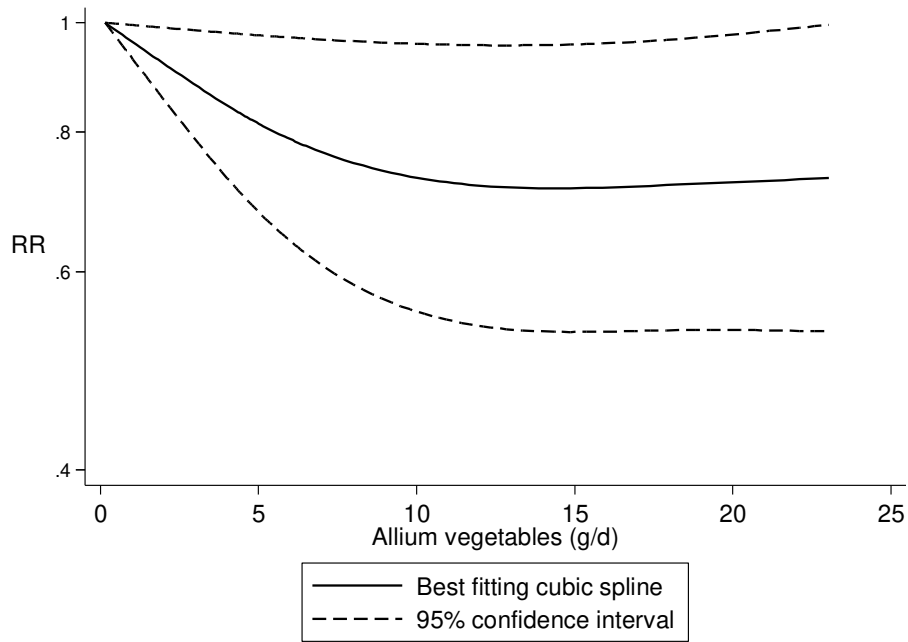

**Supplemental Figure 55.** Broccoli and type 2 diabetes, high vs. low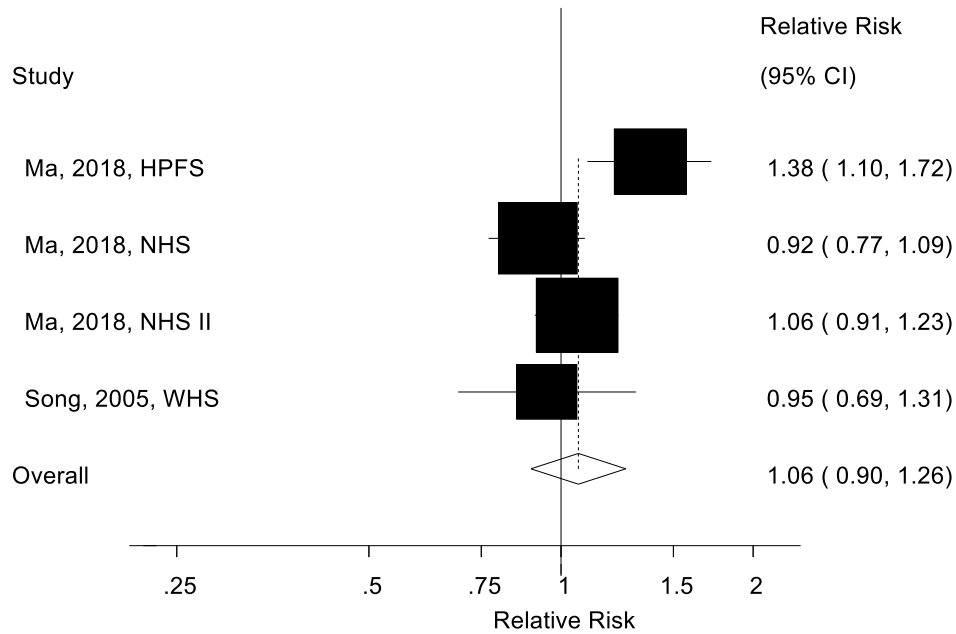**Supplemental Figure 56.** Broccoli and type 2 diabetes, dose-response analysis per 100 g/d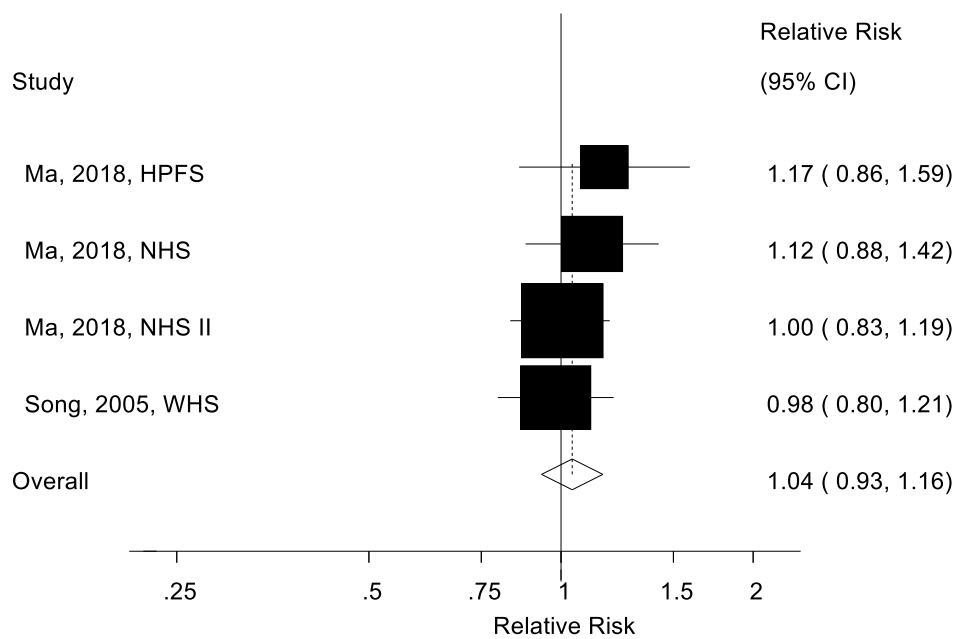



**Supplemental Figure 57.** Broccoli and type 2 diabetes, nonlinear dose-response analysis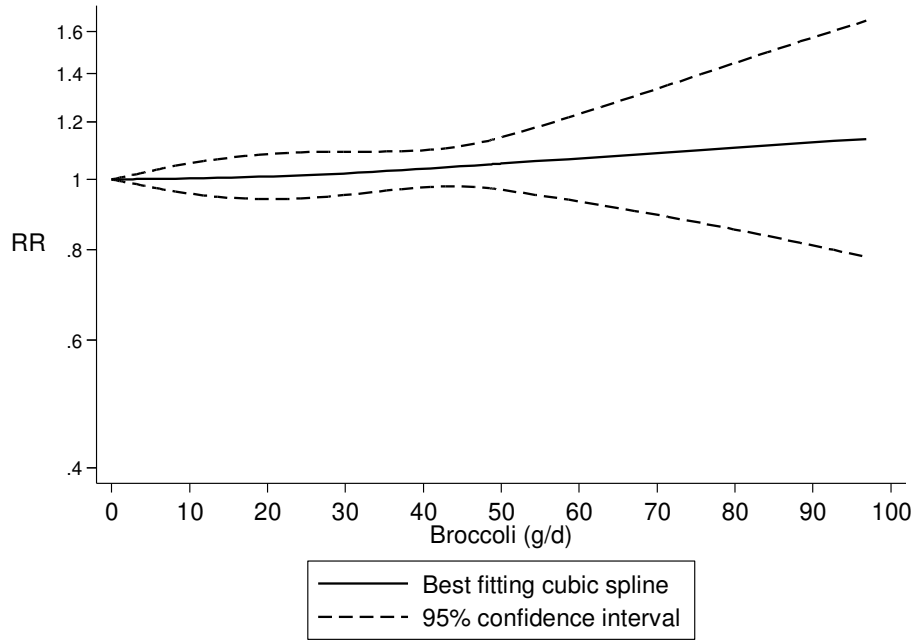

**Supplemental Figure 58.** Brussels sprouts and type 2 diabetes, high vs. low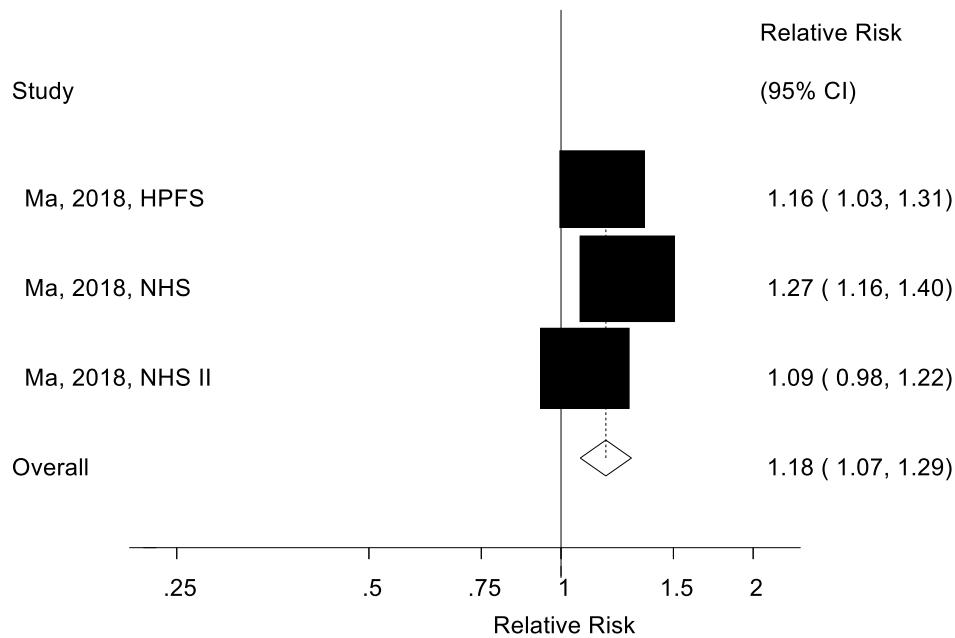**Supplemental Figure 59.** Brussels sprouts and type 2 diabetes, dose-response analysis per 10 g/d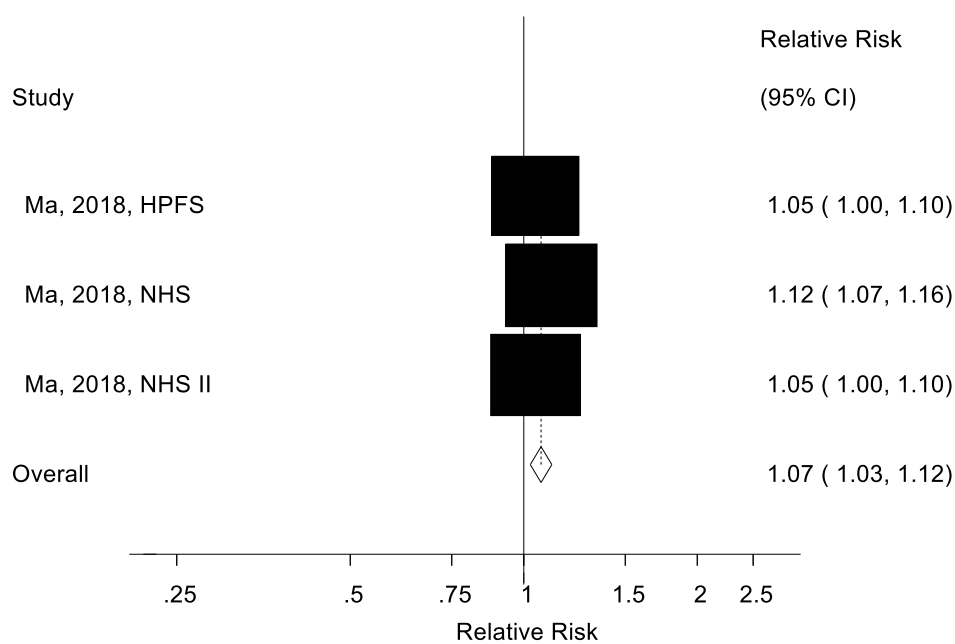

**Supplemental Figure 60.** Brussels sprouts and type 2 diabetes, nonlinear dose-response analysis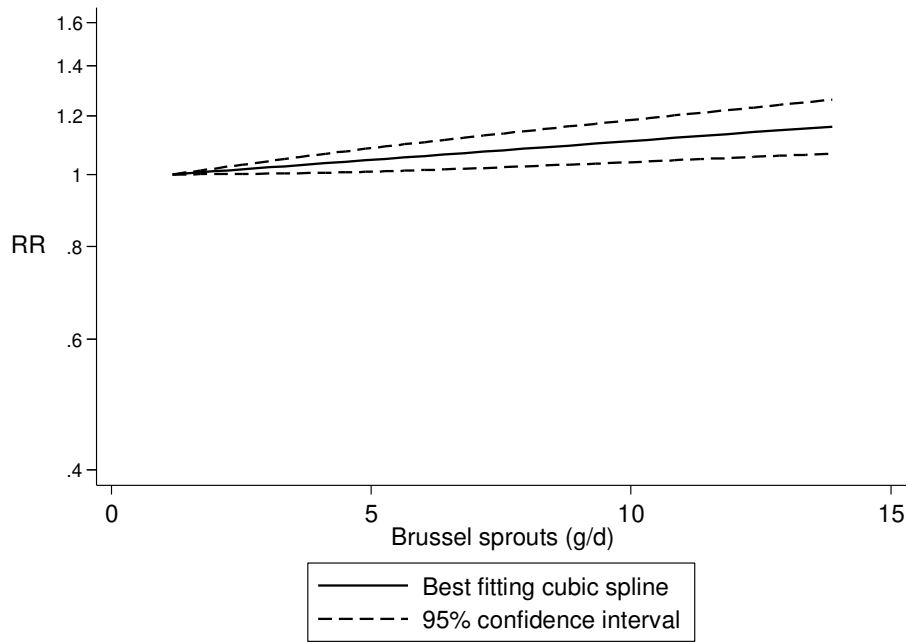

**Supplemental Figure 61.** Cabbage and type 2 diabetes, high vs. low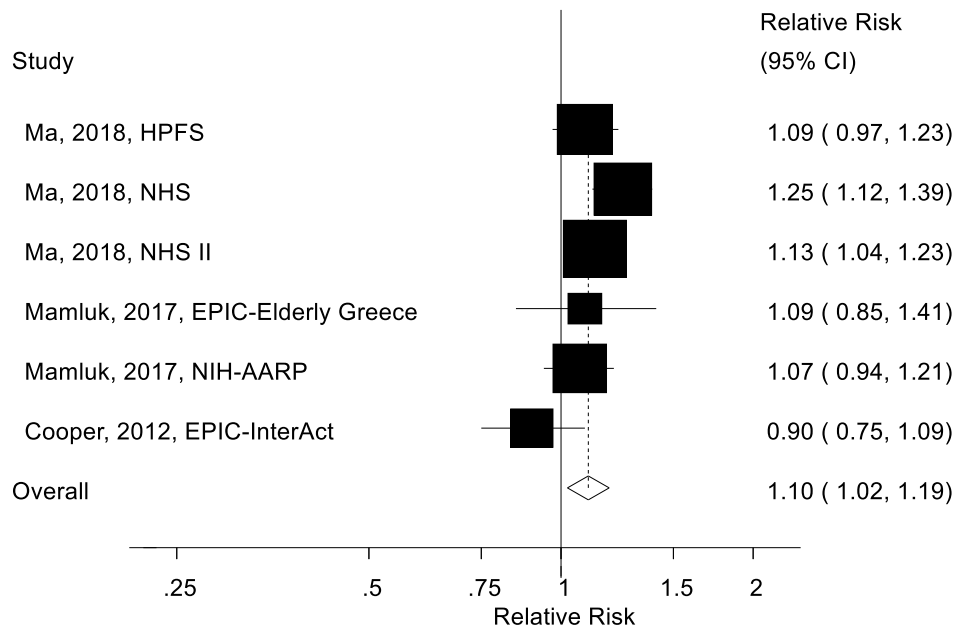**Supplemental Figure 62.** Cabbage and type 2 diabetes, dose-response analysis per 100 g/d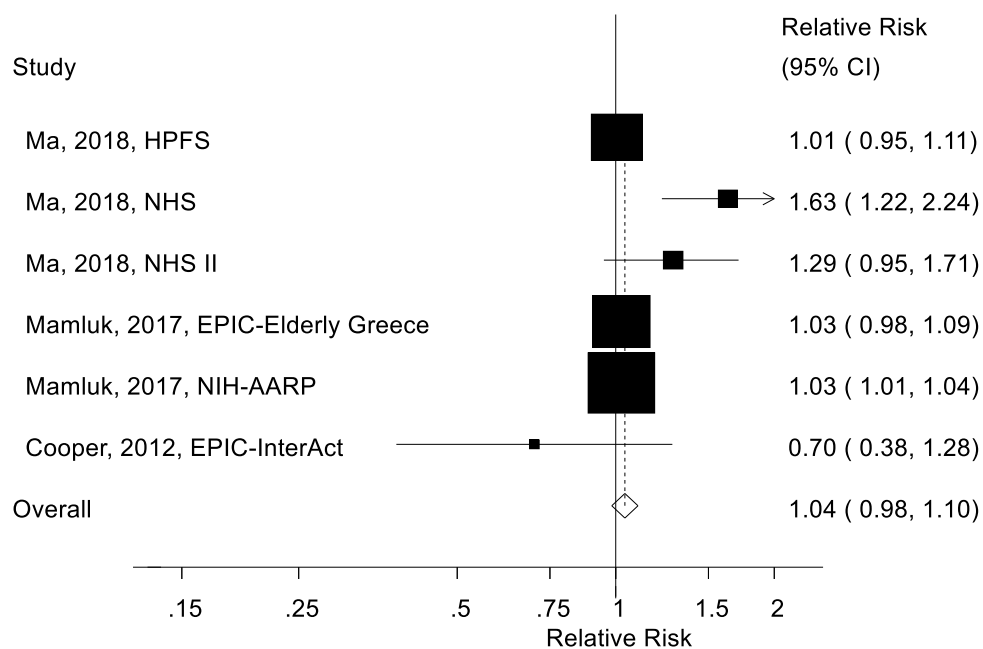

**Supplemental Figure 63.** Cabbage and type 2 diabetes, nonlinear dose-response analysis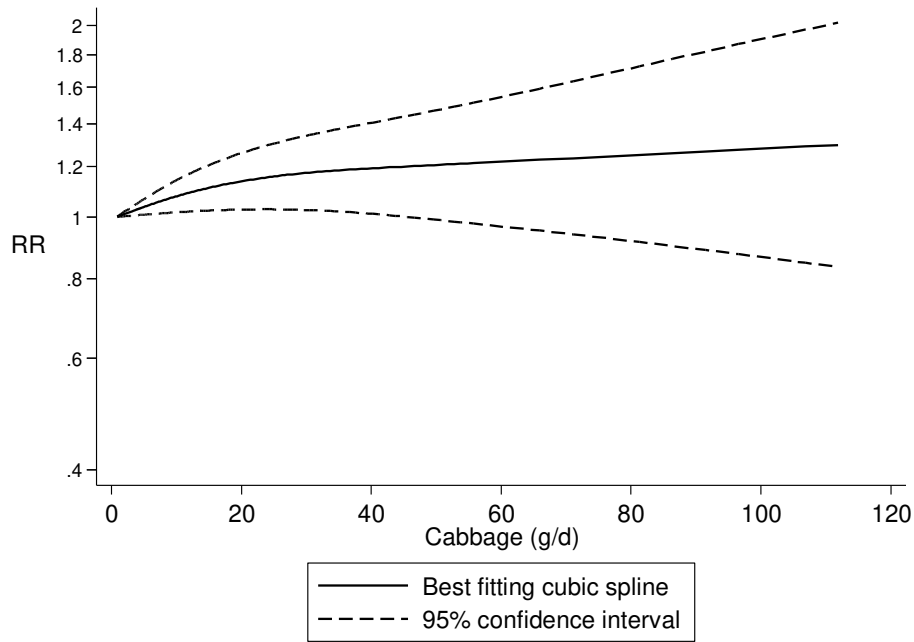

**Supplemental Figure 64.** Cauliflower and type 2 diabetes, high vs. low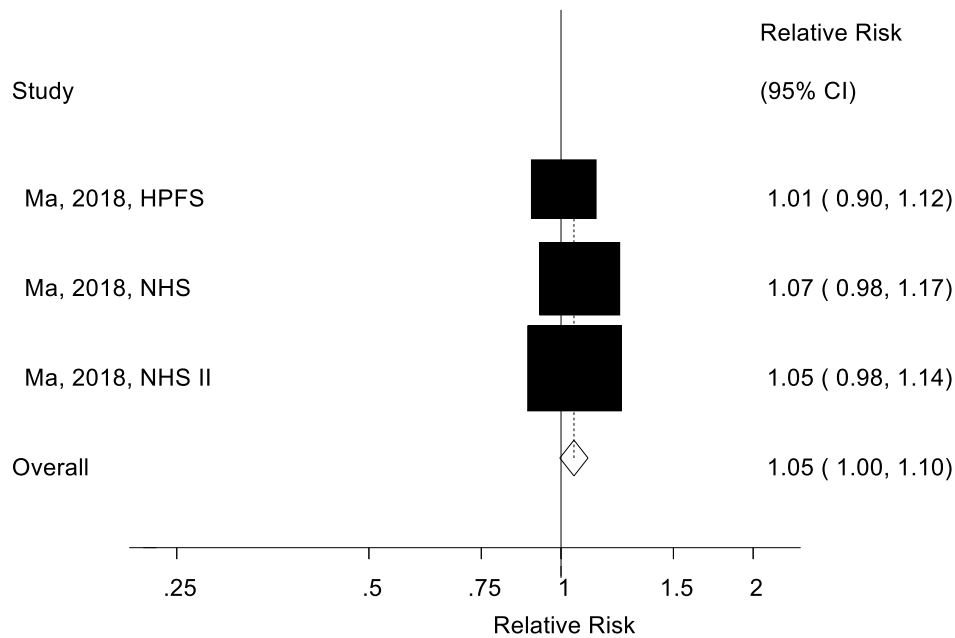**Supplemental Figure 65.** Cauliflower and type 2 diabetes, dose-response analysis per 100 g/d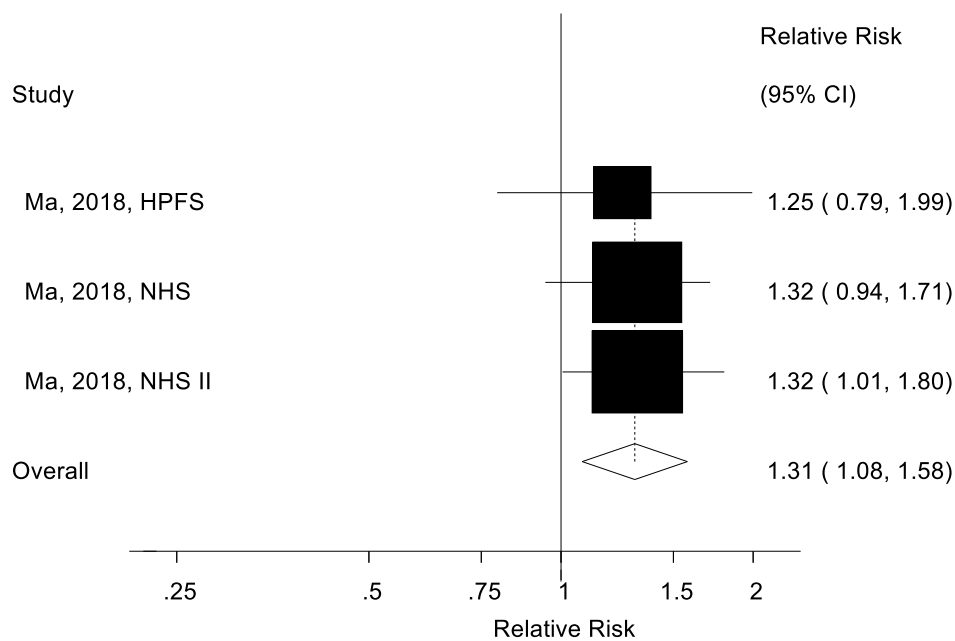

**Supplemental Figure 66.** Cauliflower and type 2 diabetes, nonlinear dose-response analysis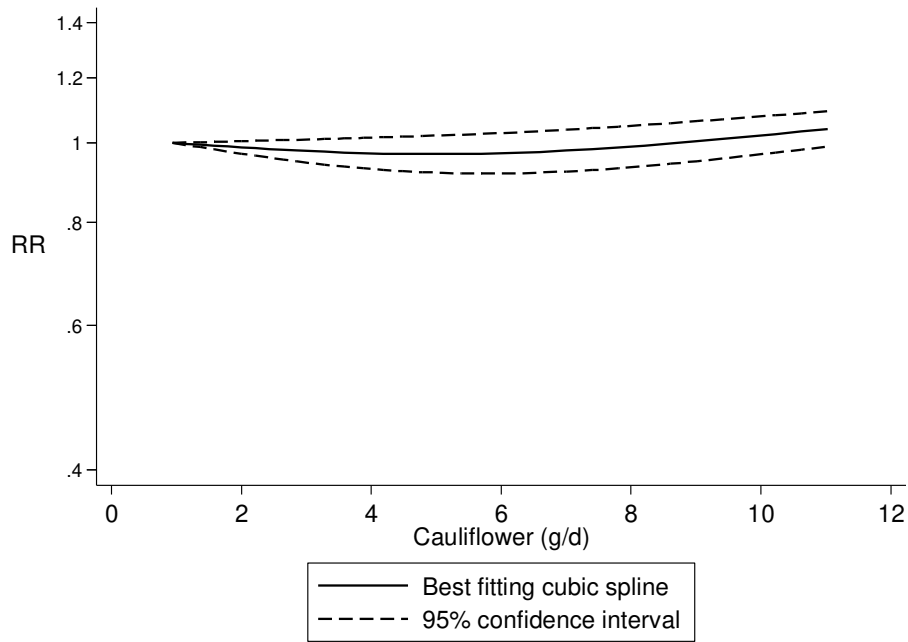

**Supplemental Figure 67 .** Cruciferous vegetables and type 2 diabetes, high vs. low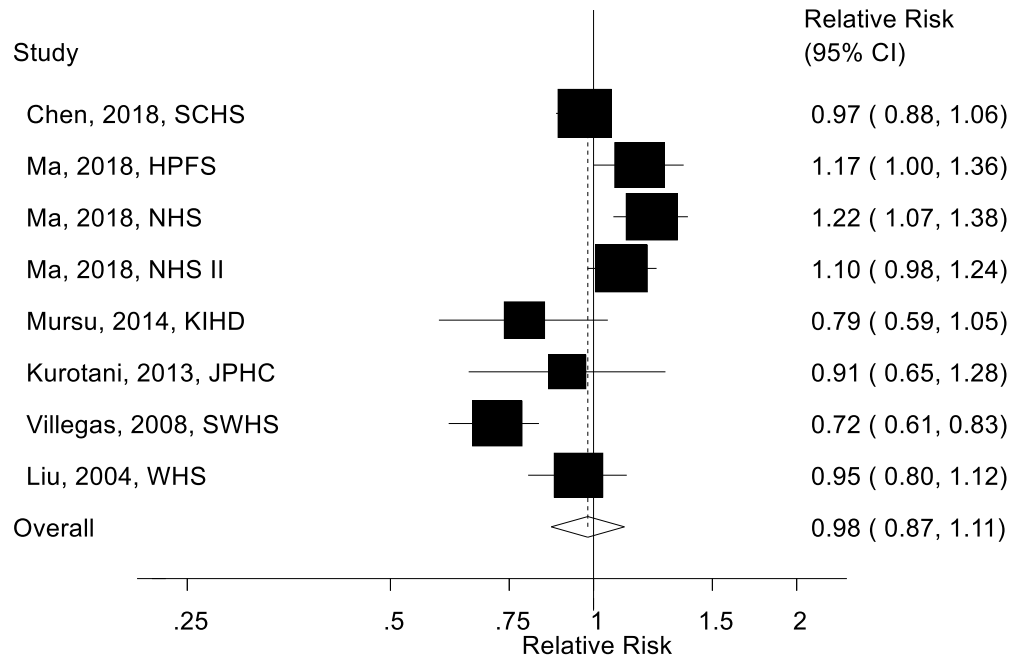**Supplemental Figure 68.** Cruciferous vegetables and type 2 diabetes, dose-response analysis per 100 g/d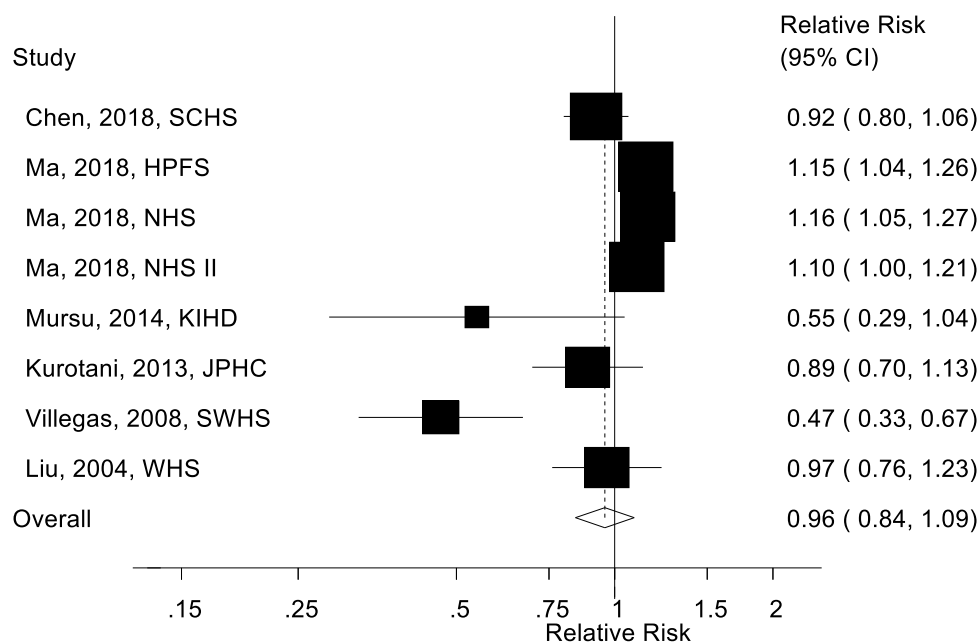



**Supplemental Figure 69.** Cruciferous vegetables and type 2 diabetes, nonlinear dose-response analysis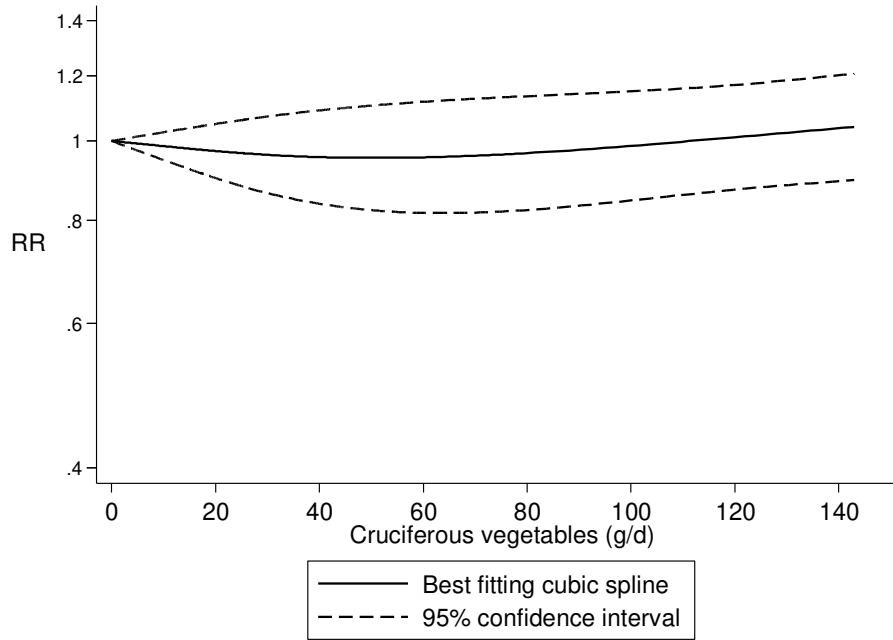

**Supplemental Figure 70.** Green leafy vegetables and type 2 diabetes, high vs. low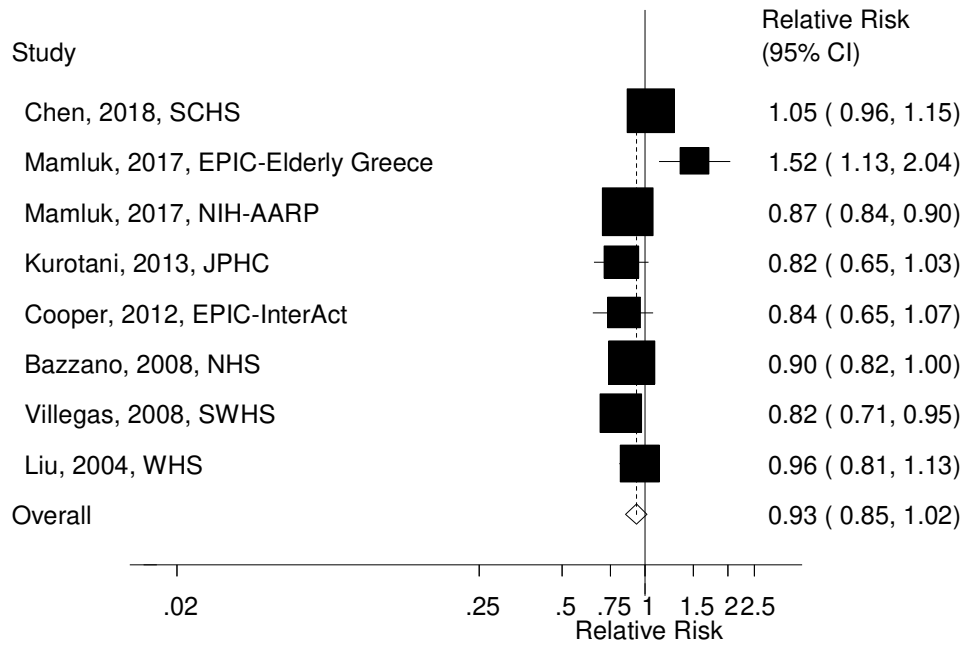**Supplemental Figure 71.** Green leafy vegetables and type 2 diabetes, dose-response analysis per 100 g/d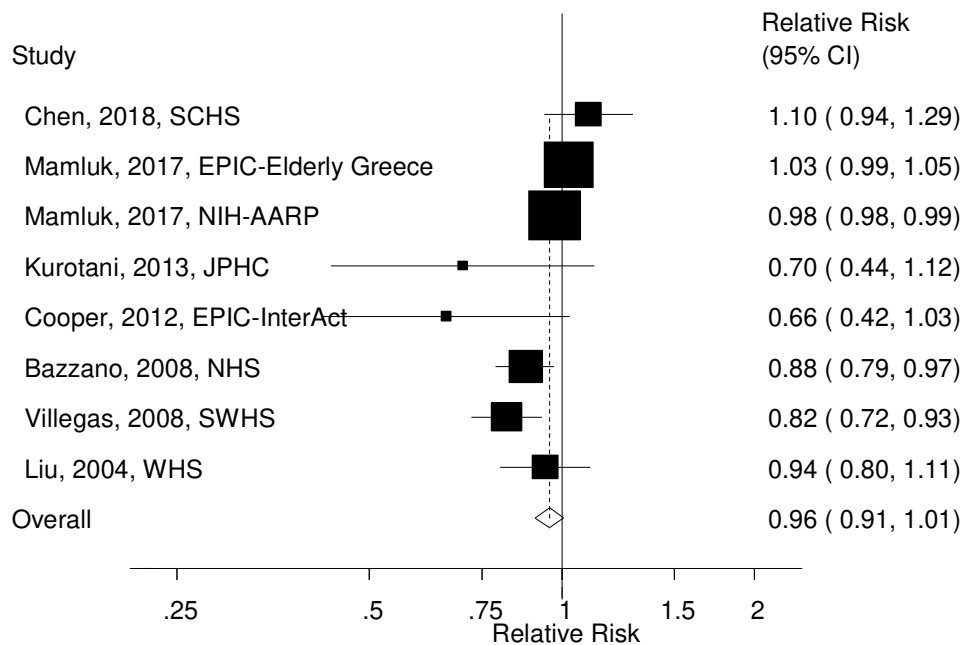

**Supplemental Figure 72.** Green leafy vegetables and type 2 diabetes, nonlinear dose-response analysis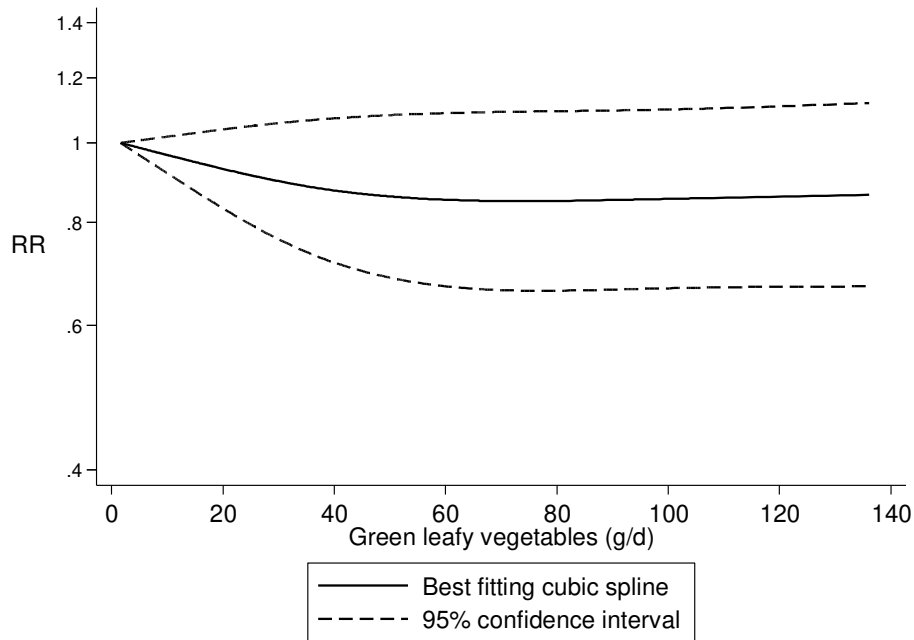

**Supplemental Figure 73.** Kale, mustard and chard greens and type 2 diabetes, high vs. low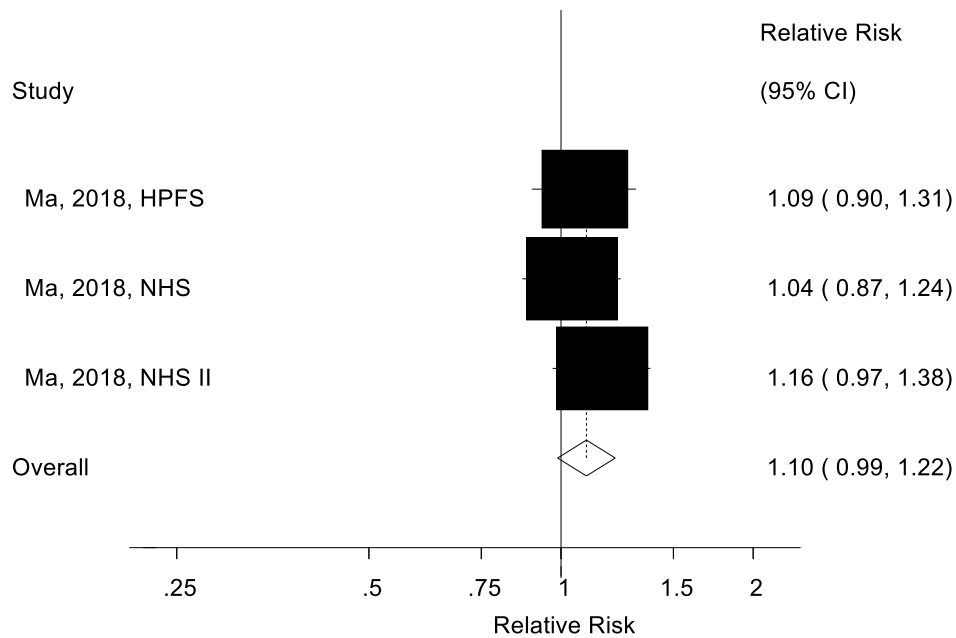**Supplemental Figure 74.** Kale, mustard and chard greens and type 2 diabetes, dose-response analysis per 10 g/d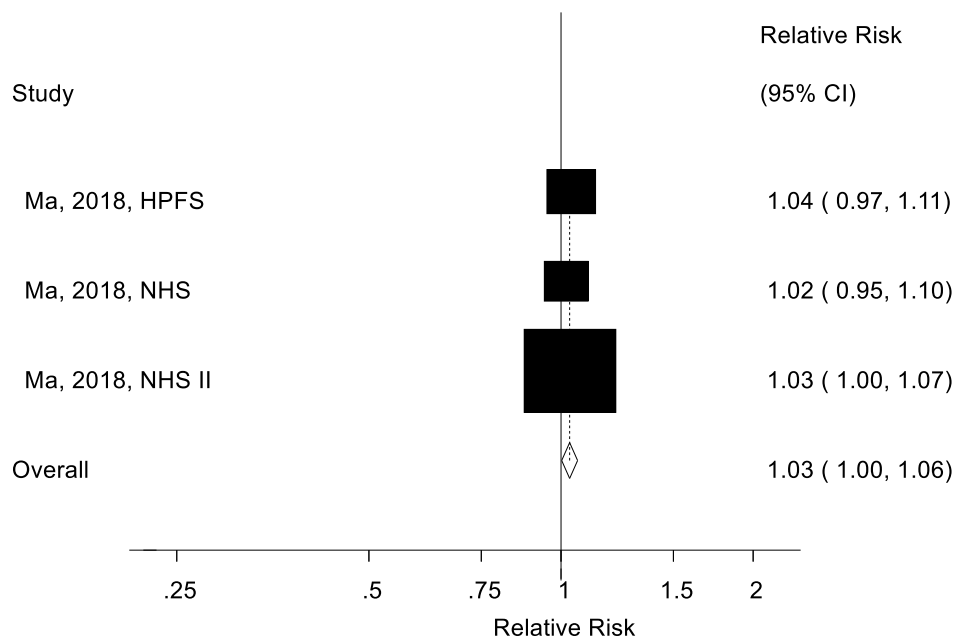

**Supplemental Figure 75.** Kale, mustard and chard greens and type 2 diabetes, nonlinear dose-response analysis

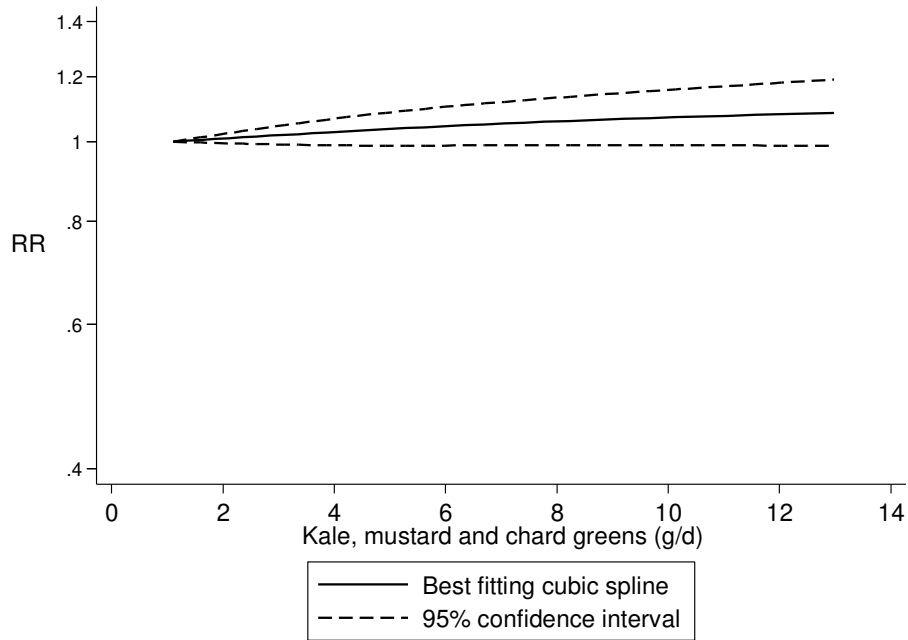

**Supplemental Figure 76.** Mushrooms and type 2 diabetes, high vs. low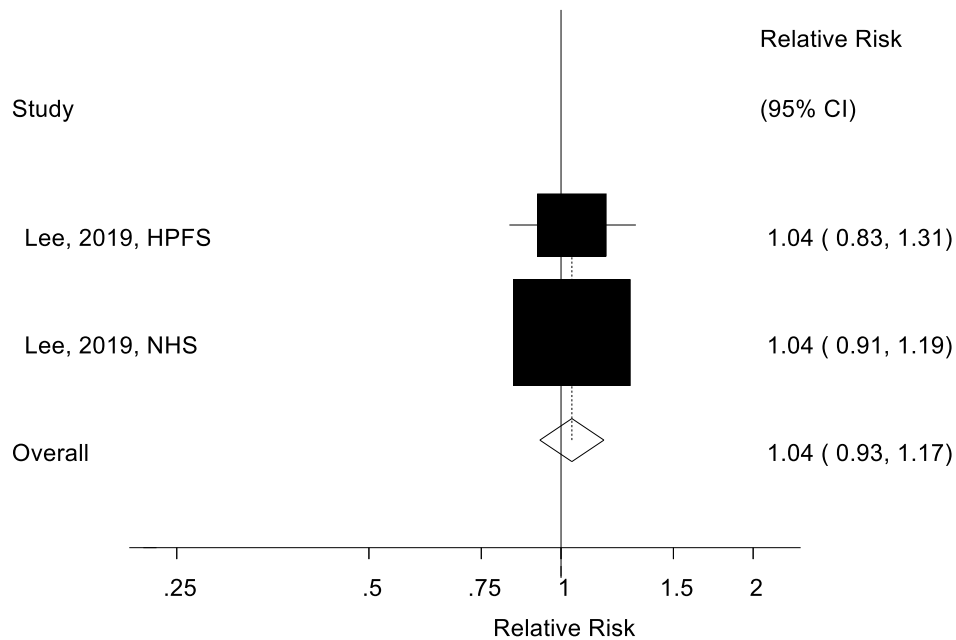**Supplemental Figure 77.** Mushrooms and type 2 diabetes, dose-response analysis per 10 g/d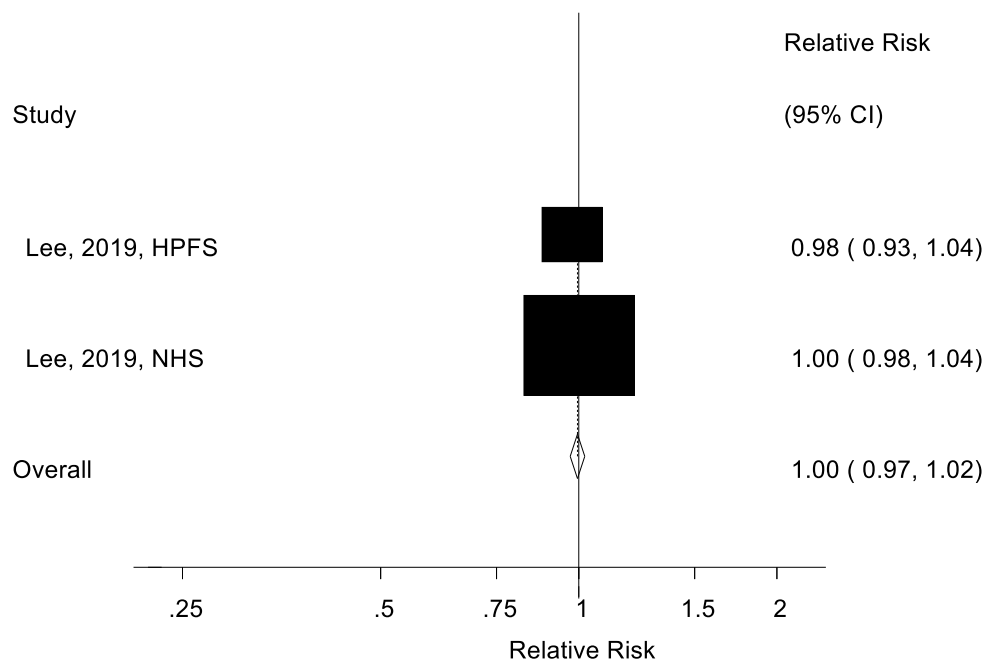

**Supplemental Figure 78.** Mushrooms and type 2 diabetes, nonlinear dose-response analysis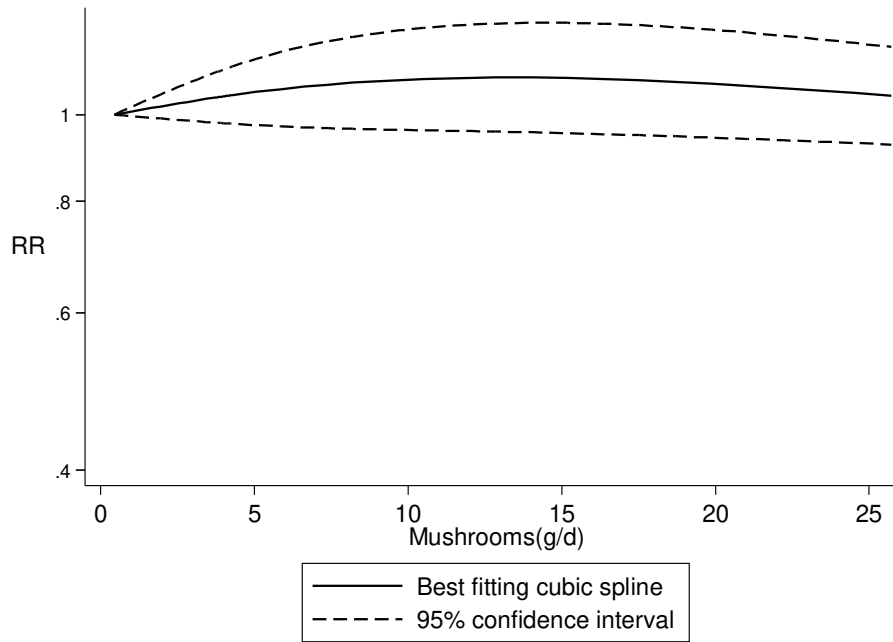

**Supplemental Figure 79.** Potatoes, boiled and type 2 diabetes, high vs. low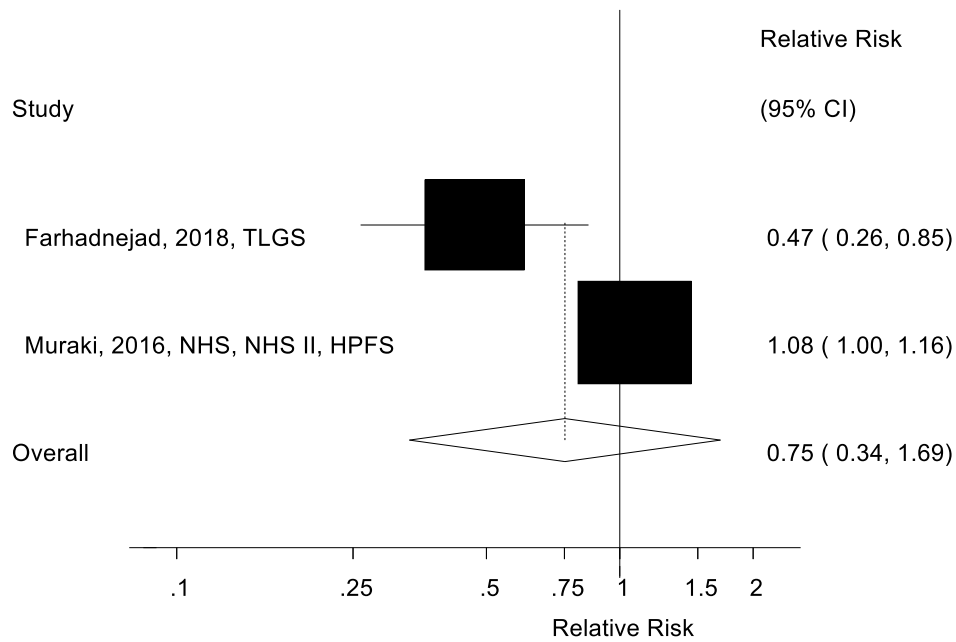**Supplemental Figure 80.** Potatoes, boiled and type 2 diabetes, dose-response analysis per 100 g/d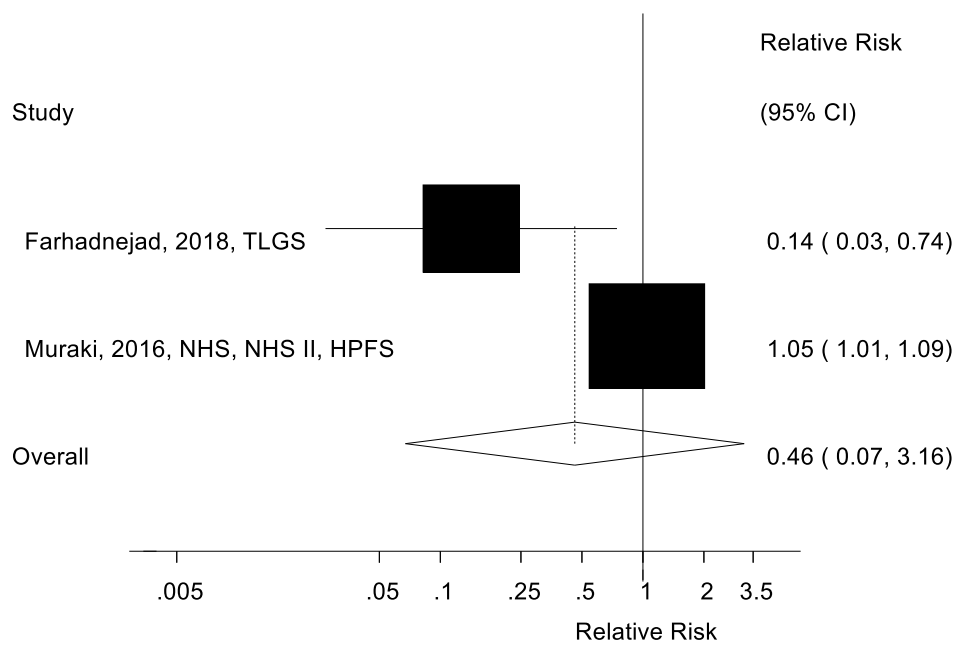



**Supplemental Figure 81.** Potatoes, boiled and type 2 diabetes, nonlinear dose-response analysis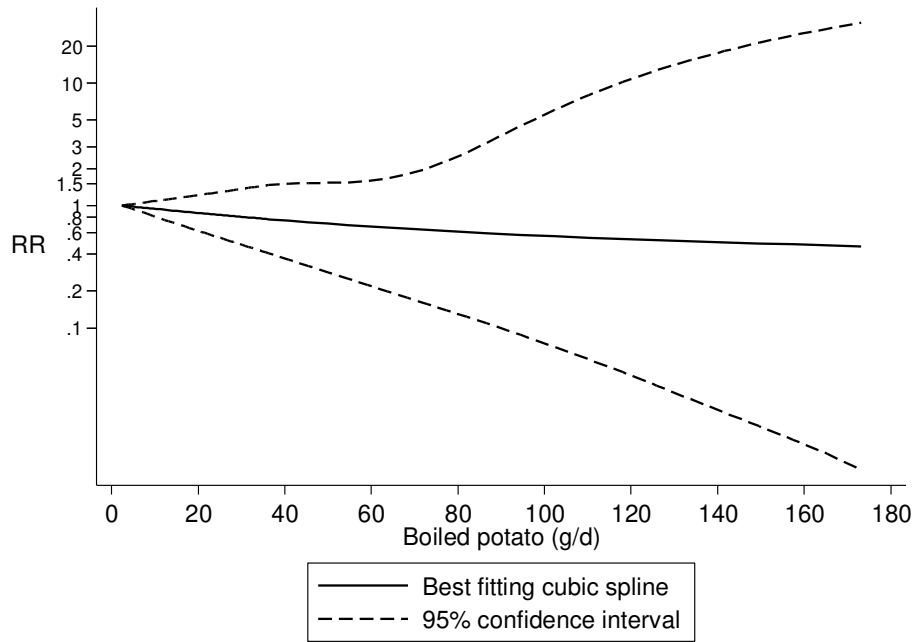

**Supplemental Figure 82.** Potatoes, total and type 2 diabetes, high vs. low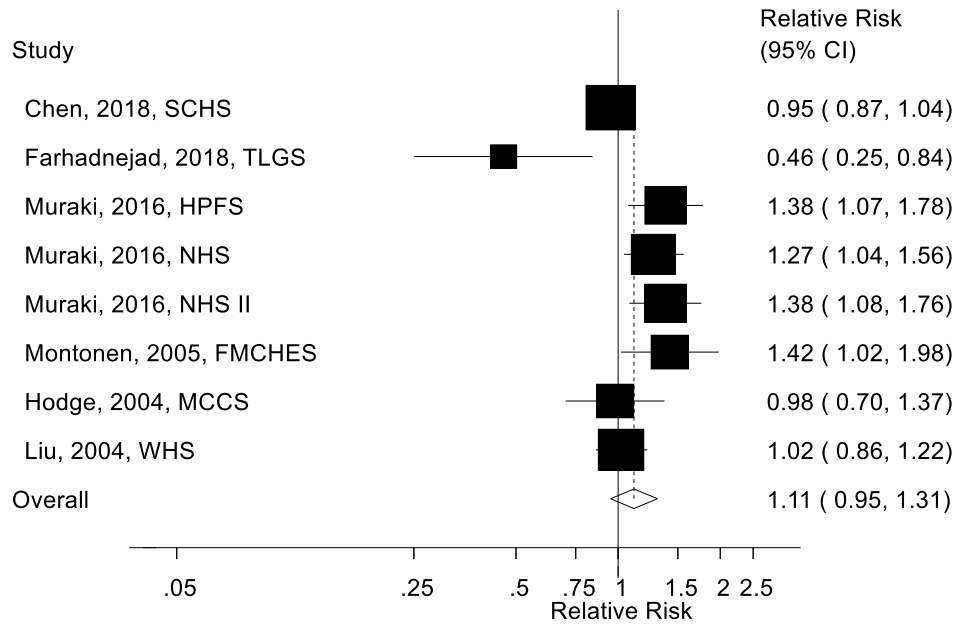**Supplemental Figure 83.** Potatoes, total and type 2 diabetes, dose-response analysis per 100 g/d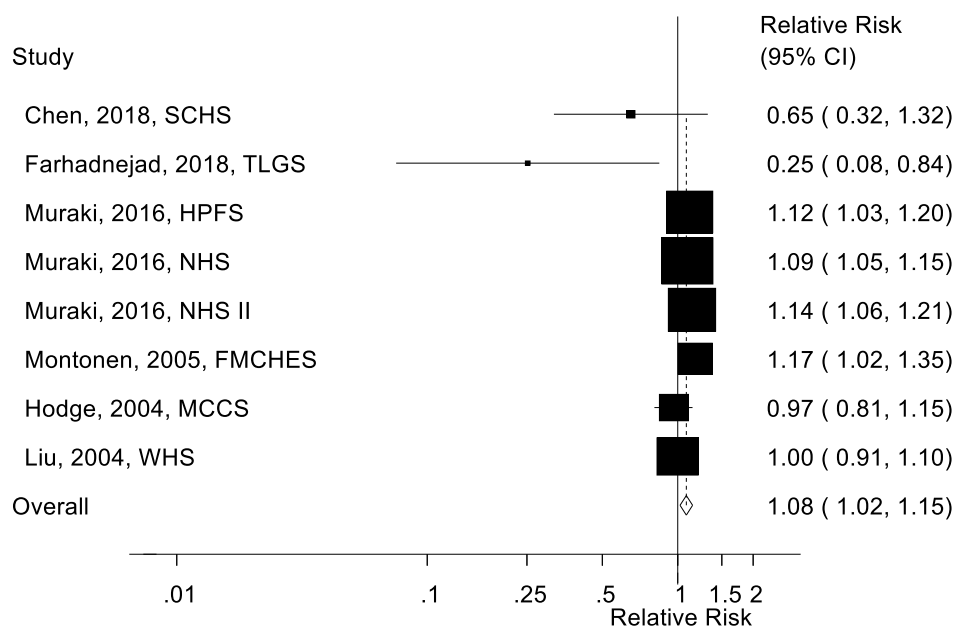

**Supplemental Figure 84.** Potatoes, total and type 2 diabetes, nonlinear dose-response analysis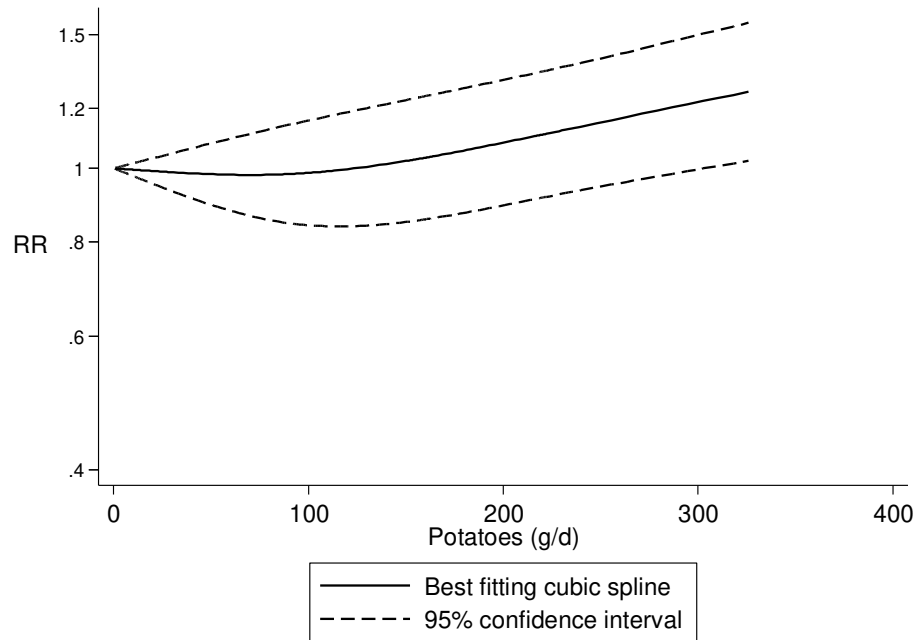

**Supplemental Figure 85.** Tomatoes and type 2 diabetes, high vs. low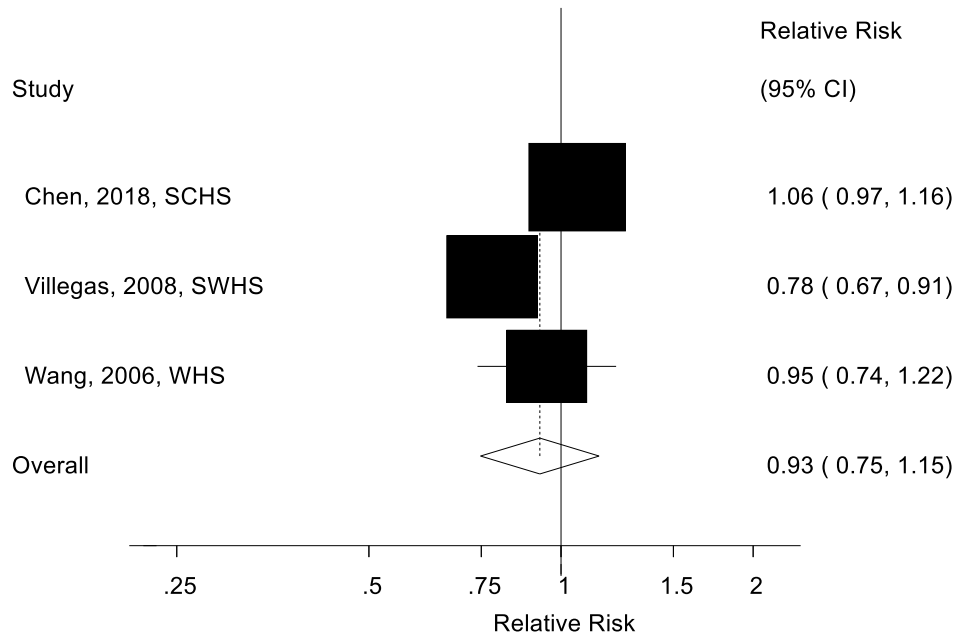**Supplemental Figure 86.** Tomatoes and type 2 diabetes, dose-response analysis per 100 g/d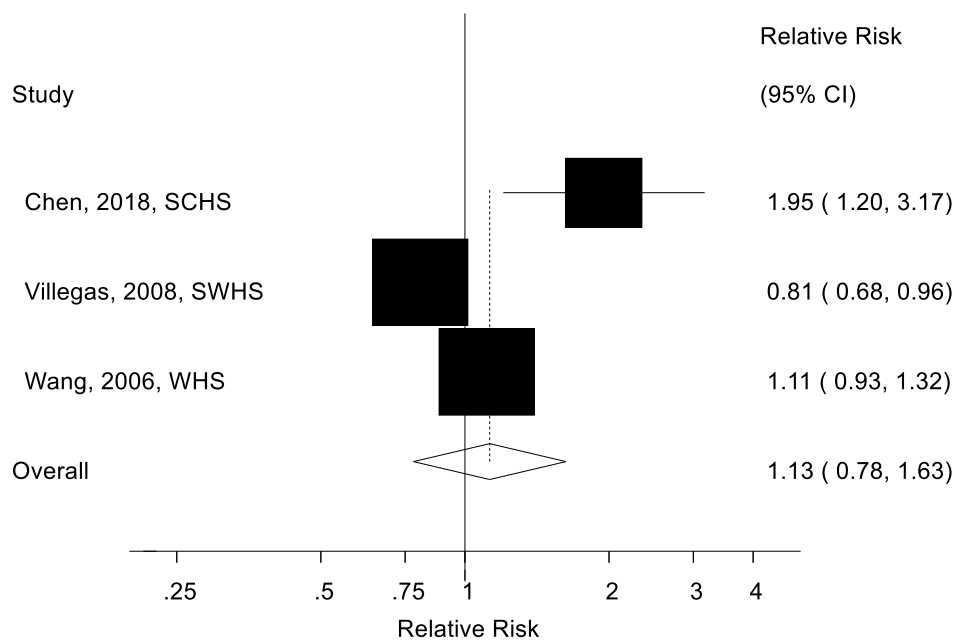

**Supplemental Figure 87.** Tomatoes and type 2 diabetes, nonlinear dose-response analysis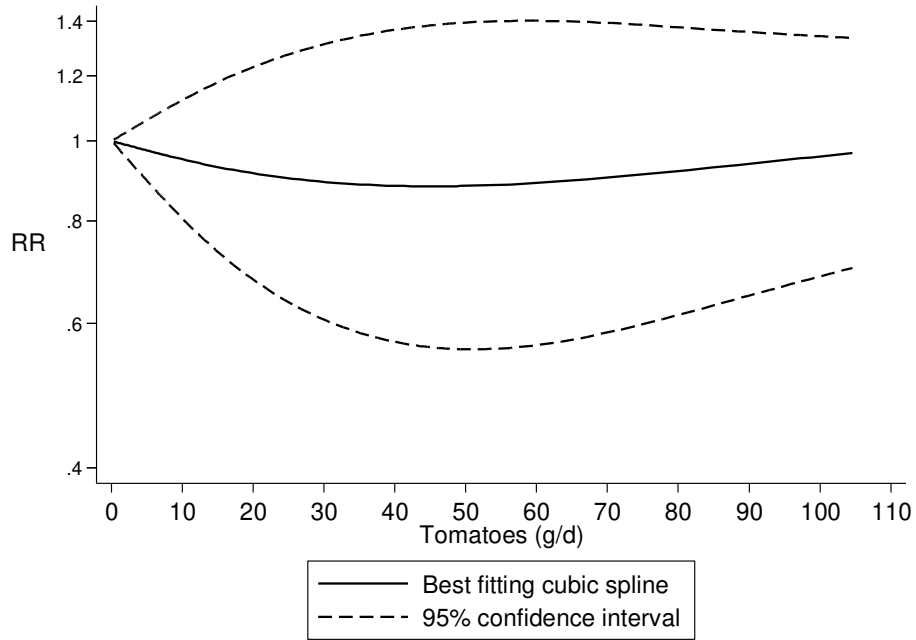

**Supplemental Figure 88.** Yellow vegetables and type 2 diabetes, high vs. low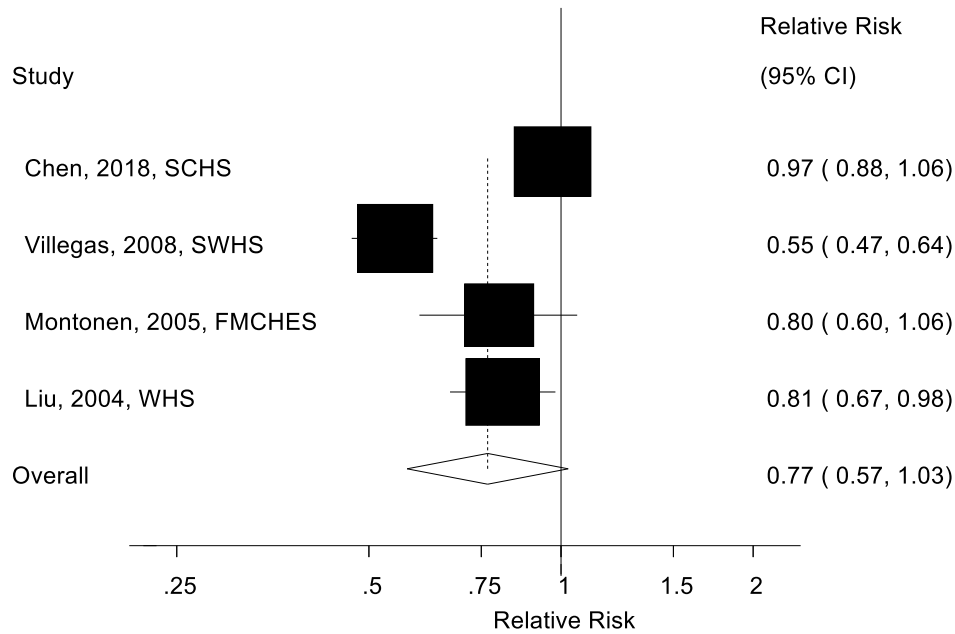**Supplemental Figure 89.** Yellow vegetables and type 2 diabetes, dose-response analysis per 100 g/d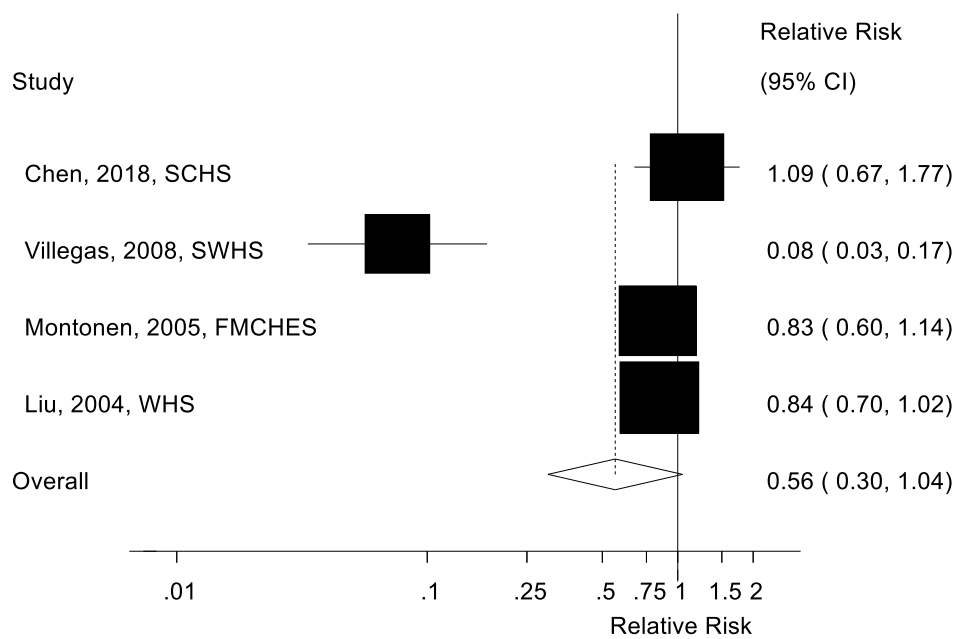

**Supplemental Figure 90.** Yellow vegetables and type 2 diabetes, nonlinear dose-response analysis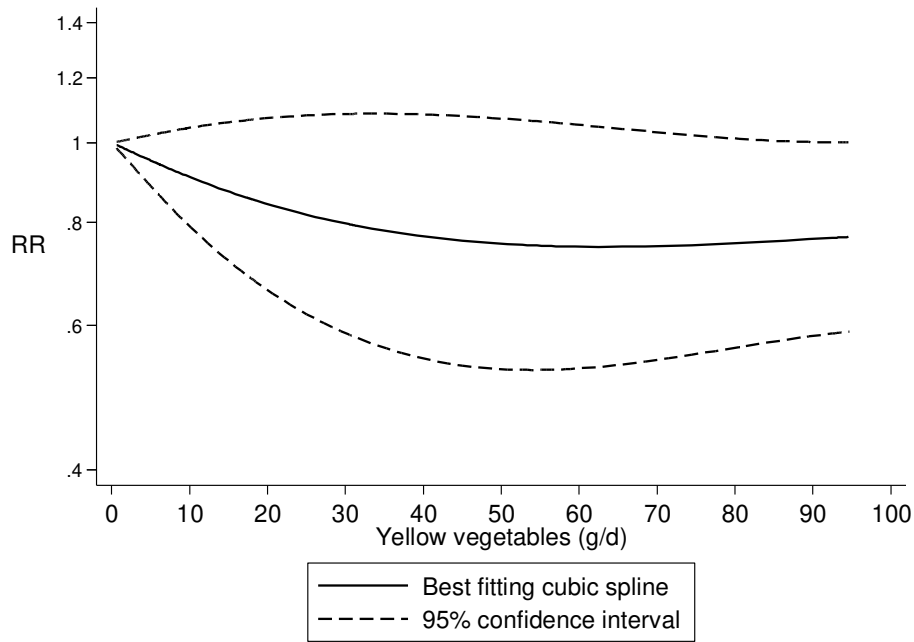

## Influence analyses

**Supplemental Figure 91.** Influence analysis of fruit and vegetables and type 2 diabetes, high vs. low

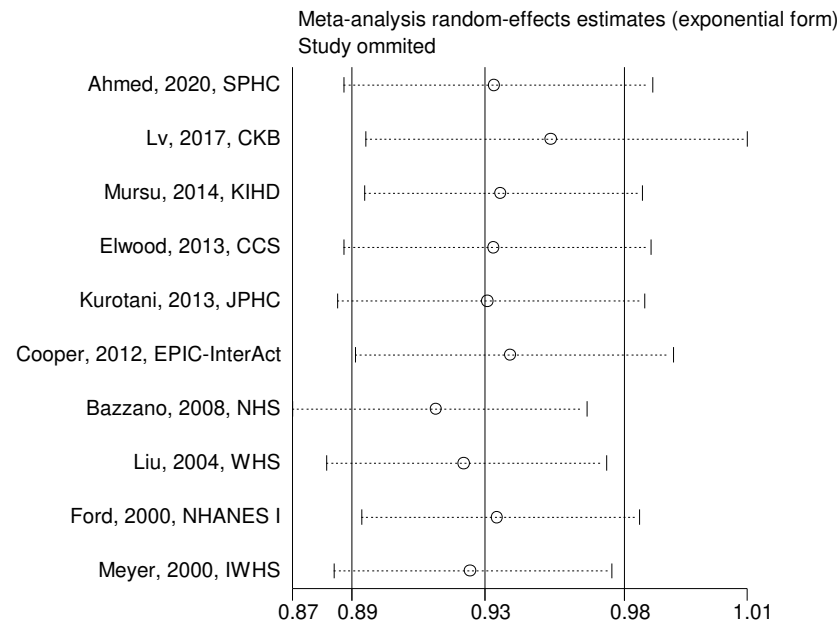

| Study omitted               | e <sup>coef.</sup> | [95% Conf. Interval]    |
|-----------------------------|--------------------|-------------------------|
| Ahmed, 2020, SPHC           | 0.93547297         | 0.88919145 - 0.98416334 |
| Lv, 2017, CKB               | 0.95280933         | 0.89588749 - 1.0133477  |
| Mursu, 2014, KIID           | 0.93734324         | 0.89556736 - 0.9810679  |
| Elwood, 2013, CCS           | 0.93528491         | 0.88917738 - 0.9837833  |
| Kurotani, 2013, JPHC        | 0.9332673          | 0.88722008 - 0.98170435 |
| Cooper, 2012, EPIC-InterAct | 0.94038975         | 0.89269066 - 0.99063748 |
| Bazzano, 2008, NHS          | 0.91757935         | 0.87332505 - 0.96407616 |
| Liu, 2004, WHS              | 0.92597556         | 0.88390166 - 0.97005224 |
| Ford, 2000, NHANES I        | 0.93639976         | 0.89467269 - 0.98007292 |
| Meyer, 2000, IWHS           | 0.92791849         | 0.88620329 - 0.97159731 |
| Combined                    | 0.93264382         | 0.89156727 - 0.97561285 |



**Supplemental Figure 92.** Influence analysis of fruit and vegetables and type 2 diabetes, dose-response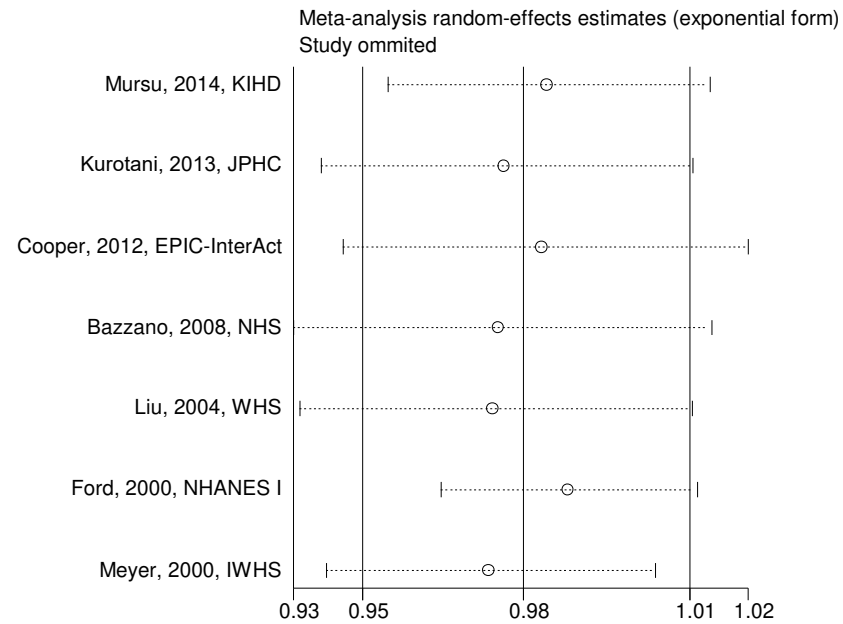

| Study omitted               | e <sup>coef.</sup> | [95% Conf. Interval] |
|-----------------------------|--------------------|----------------------|
| Mursu, 2014, KIHD           | 0.98320258         | 0.95193875 1.0154932 |
| Kurotani, 2013, JPHC        | 0.97476596         | 0.93873465 1.0121802 |
| Cooper, 2012, EPIC-InterAct | 0.98224336         | 0.94305086 1.0230646 |
| Bazzano, 2008, NHS          | 0.97366518         | 0.93324012 1.0158414 |
| Liu, 2004, WHS              | 0.97250021         | 0.93453473 1.0120081 |
| Ford, 2000, NHANES I        | 0.98739189         | 0.96240878 1.0130235 |
| Meyer, 2000, IWHS           | 0.97170234         | 0.93973494 1.0047572 |
| Combined                    | 0.97869077         | 0.94691062 1.0115375 |

**Supplemental Figure 93.** Influence analysis of fruits and type 2 diabetes, high vs. low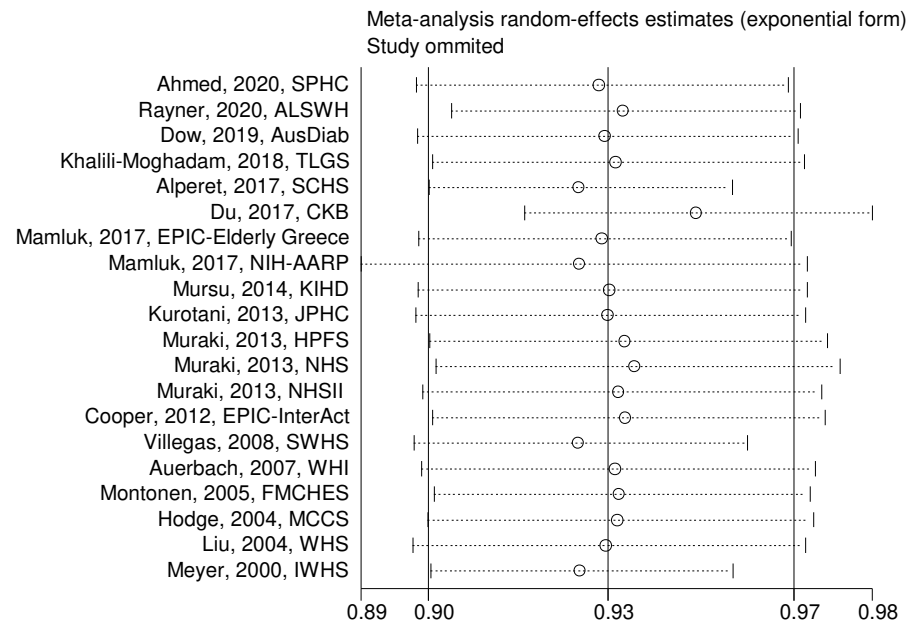

| Study omitted                     | e <sup>coef.</sup> | [95% Conf. Interval]           |
|-----------------------------------|--------------------|--------------------------------|
| Ahmed, 2020, SPHC                 | 0.93247199         | 0.90179646 - 0.96419102        |
| Rayner, 2020, ALSWH               | 0.93652213         | 0.90771925 - 0.96623892        |
| Dow, 2019, AusDiab                | 0.93341899         | 0.90204149 - 0.96588802        |
| Khalili-Moghadam, 2018, TLGS      | 0.93519598         | 0.90447289 - 0.96696264        |
| Alperet, 2017, SCHS               | 0.92904216         | 0.9039278 - 0.95485425         |
| Du, 2017, CKB                     | 0.94871879         | 0.92000133 - 0.97833264        |
| Mamluk, 2017, EPIC-Elderly Greece | 0.93295616         | 0.90221488 - 0.96474493        |
| Mamluk, 2017, NIH-AARP            | 0.92918587         | 0.89250141 - 0.9673782         |
| Mursu, 2014, KIHD                 | 0.93418825         | 0.90211201 - 0.96740496        |
| Kurotani, 2013, JPHC              | 0.93386483         | 0.90173644 - 0.96713799        |
| Muraki, 2013, HPFS                | 0.93681407         | 0.90406692 - 0.97074729        |
| Muraki, 2013, NHS                 | 0.93841732         | 0.90511608 - 0.97294372        |
| Muraki, 2013, NHSII               | 0.93573397         | 0.90286249 - 0.9698022         |
| Cooper, 2012, EPIC-InterAct       | 0.93684429         | 0.90447021 - 0.97037715        |
| Villegas, 2008, SWHS              | 0.9289788          | 0.90143943 - 0.95735955        |
| Auerbach, 2007, WHI               | 0.93513381         | 0.90271389 - 0.96871799        |
| Montonen, 2005, FMCHES            | 0.93581933         | 0.90482312 - 0.96787727        |
| Hodge, 2004, MCCS                 | 0.93554235         | 0.90377825 - 0.96842283        |
| Liu, 2004, WHS                    | 0.9335776          | 0.90119624 - 0.96712238        |
| Meyer, 2000, IWHS                 | 0.92928594         | 0.90426886 - 0.9549951         |
| <b>Combined</b>                   | <b>0.93400961</b>  | <b>0.90386586 - 0.96515866</b> |

**Supplemental Figure 94.** Influence analysis of fruits and type 2 diabetes, dose-response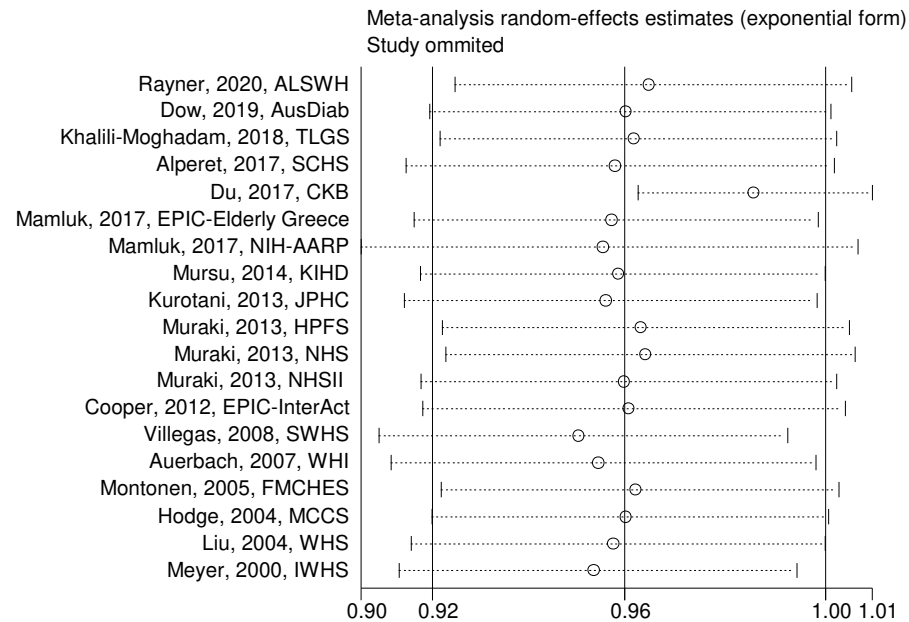

| Study omitted                     | e <sup>coef.</sup> | [95% Conf. Interval]    |
|-----------------------------------|--------------------|-------------------------|
| Rayner, 2020, ALSWH               | 0.96176034         | 0.92036897 - 1.0050132  |
| Dow, 2019, AusDiab                | 0.95680082         | 0.91494524 - 1.0005711  |
| Khalili-Moghadam, 2018, TLGS      | 0.95852929         | 0.91716462 - 1.0017595  |
| Alperet, 2017, SCHS               | 0.95452982         | 0.91001111 - 1.0012265  |
| Du, 2017, CKB                     | 0.98409837         | 0.95943958 - 1.009391   |
| Mamluk, 2017, EPIC-Elderly Greece | 0.95375156         | 0.91164643 - 0.9978013  |
| Mamluk, 2017, NIH-AARP            | 0.95187545         | 0.90033776 - 1.0063633  |
| Mursu, 2014, KIHD                 | 0.95523369         | 0.91308117 - 0.99933213 |
| Kurotani, 2013, JPHC              | 0.95255357         | 0.90952492 - 0.99761784 |
| Muraki, 2013, HPFS                | 0.96008295         | 0.9176845 - 1.0044403   |
| Muraki, 2013, NHS                 | 0.96106845         | 0.91841727 - 1.0057002  |
| Muraki, 2013, NHSII               | 0.956442           | 0.9131425 - 1.0017947   |
| Cooper, 2012, EPIC-InterAct       | 0.95750827         | 0.91350383 - 1.0036324  |
| Villegas, 2008, SWHS              | 0.94676578         | 0.90423012 - 0.99130237 |
| Auerbach, 2007, WHI               | 0.95100725         | 0.90678614 - 0.99738491 |
| Montonen, 2005, FMCHES            | 0.95893568         | 0.91750336 - 1.002239   |
| Hodge, 2004, MCCS                 | 0.95679522         | 0.91542429 - 1.0000358  |
| Liu, 2004, WHS                    | 0.95417082         | 0.91102695 - 0.99935794 |
| Meyer, 2000, IWHS                 | 0.94997597         | 0.90852088 - 0.99332261 |
| Combined                          | 0.95660443         | 0.91557687 - 0.99947047 |

**Supplemental Figure 95.** Influence analysis of vegetables and type 2 diabetes, high vs. low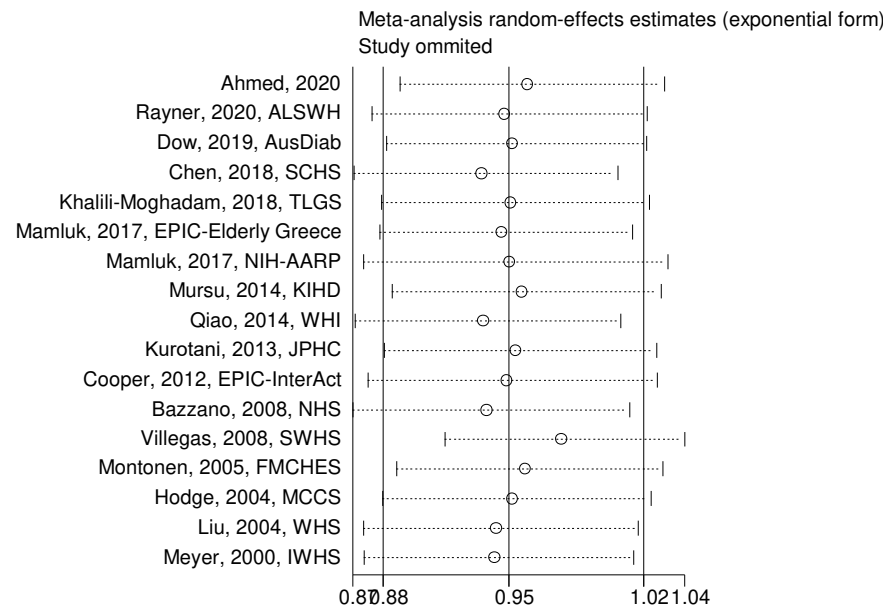

| Study omitted                     | e <sup>coef.</sup> | [95% Conf. Interval]  |
|-----------------------------------|--------------------|-----------------------|
| Ahmed, 2020                       | .95699638          | .8931098 - 1.025453   |
| Rayner, 2020, ALSWH               | .94537294          | .87898093 - 1.0167798 |
| Dow, 2019, AusDiab                | .94916427          | .88630438 - 1.0164824 |
| Chen, 2018, SCHS                  | .93373591          | .86996573 - 1.0021806 |
| Khalili-Moghadam, 2018, TLGS      | .94847691          | .88392967 - 1.0177375 |
| Mamluk, 2017, EPIC-Elderly Greece | .94407207          | .88301307 - 1.0093533 |
| Mamluk, 2017, NIH-AARP            | .94786             | .87478215 - 1.0270426 |
| Mursu, 2014, KIHD                 | .95405197          | .88918817 - 1.0236473 |
| Qiao, 2014, WHI                   | .93470514          | .87060452 - 1.0035254 |
| Kurotani, 2013, JPHC              | .95090151          | .88521355 - 1.021464  |
| Cooper, 2012, EPIC-InterAct       | .94657701          | .87695944 - 1.0217212 |
| Bazzano, 2008, NHS                | .93624836          | .8695457 - 1.0080678  |
| Villegas, 2008, SWHS              | .97374165          | .91559154 - 1.0355849 |
| Montonen, 2005, FMCHES            | .95577735          | .89152259 - 1.0246632 |
| Hodge, 2004, MCCS                 | .94916427          | .88437188 - 1.0187036 |
| Liu, 2004, WHS                    | .9410013           | .87486327 - 1.0121392 |
| Meyer, 2000, IWHS                 | .9401927           | .875144 - 1.0100765   |
| Combined                          | .94767391          | .88465638 - 1.0151804 |

**Supplemental Figure 96.** Influence analysis of vegetables and type 2 diabetes, dose-response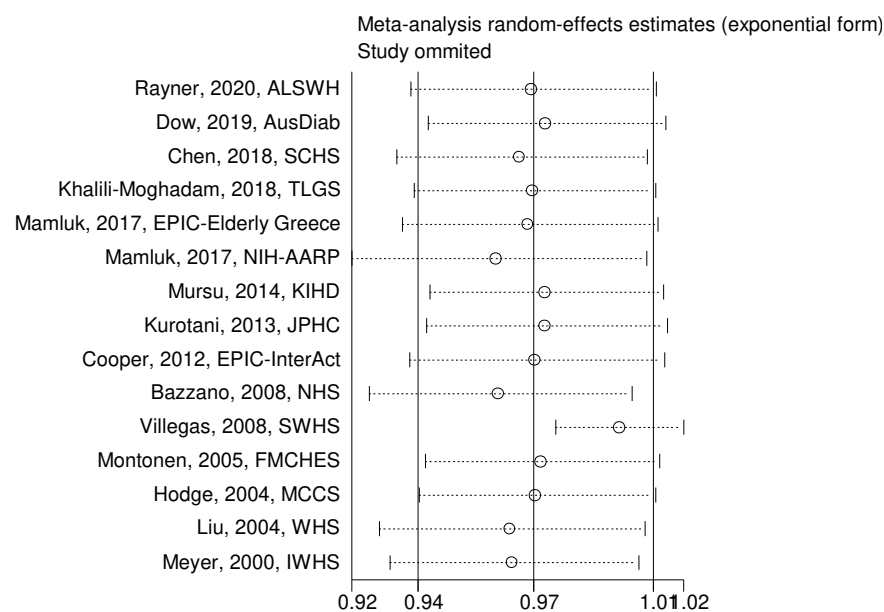

| Study omitted                     | e <sup>coef.</sup> | [95% Conf. Interval]   |
|-----------------------------------|--------------------|------------------------|
| Rayner, 2020, ALSWH               | 0.97198683         | 0.93389463 - 1.0116327 |
| Dow, 2019, AusDiab                | 0.97647488         | 0.93957615 - 1.0148227 |
| Chen, 2018, SCHS                  | 0.96834642         | 0.9294408 - 1.0088806  |
| Khalili-Moghadam, 2018, TLGS      | 0.9724946          | 0.93503714 - 1.0114527 |
| Mamluk, 2017, EPIC-Elderly Greece | 0.97100312         | 0.93137556 - 1.0123167 |
| Mamluk, 2017, NIH-AARP            | 0.96091843         | 0.91534775 - 1.0087578 |
| Mursu, 2014, KIHD                 | 0.97635812         | 0.94005024 - 1.0140684 |
| Kurotani, 2013, JPHC              | 0.97630608         | 0.93887144 - 1.0152333 |
| Cooper, 2012, EPIC-InterAct       | 0.97318387         | 0.93363976 - 1.0144029 |
| Bazzano, 2008, NHS                | 0.96153092         | 0.92085218 - 1.0040066 |
| Villegas, 2008, SWHS              | 0.99993616         | 0.97983098 - 1.0204539 |
| Montonen, 2005, FMCHES            | 0.97500229         | 0.93861377 - 1.0128015 |
| Hodge, 2004, MCCS                 | 0.97336245         | 0.93667936 - 1.0114821 |
| Liu, 2004, WHS                    | 0.96522117         | 0.92405063 - 1.008226  |
| Meyer, 2000, IWHS                 | 0.96597856         | 0.92734307 - 1.0062237 |
| Combined                          | 0.97284596         | 0.93630501 - 1.010813  |

**Supplemental Figure 97.** Influence analysis of fruits drinks and type 2 diabetes, dose-response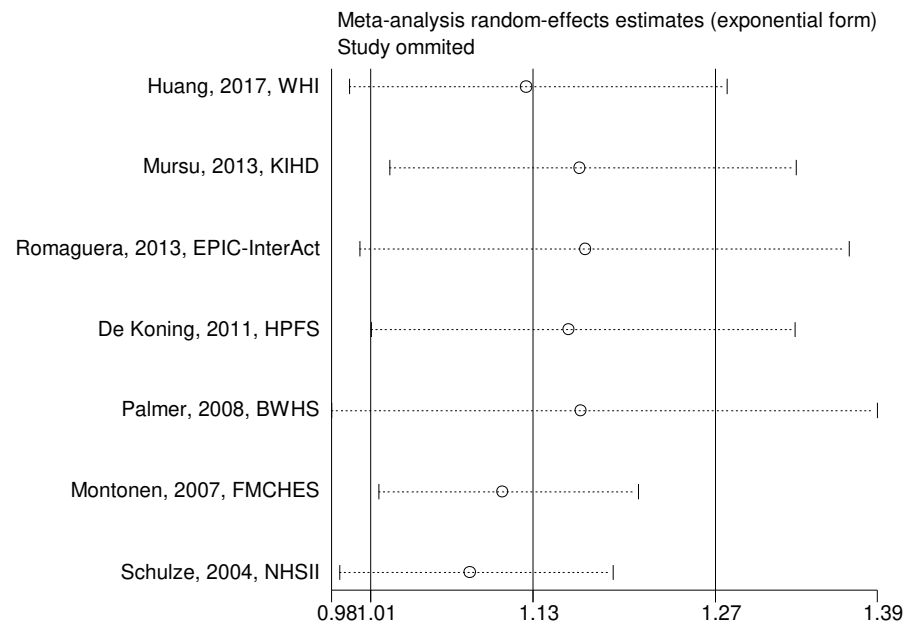

| Study omitted                  | e <sup>coef.</sup> | [95% Conf. Interval] |
|--------------------------------|--------------------|----------------------|
| Huang, 2017, WHI               | 1.1286894          | 0.99565953 1.2794933 |
| Mursu, 2013, KIID              | 1.1686578          | 1.0259602 1.3312026  |
| Romaguera, 2013, EPIC-InterAct | 1.17293181         | 1.0033647 1.3711554  |
| De Koning, 2011, HPFS          | 1.1604002          | 1.0118947 1.3307     |
| Palmer, 2008, BWHS             | 1.1695093          | 0.98227656 1.3924307 |
| Montonen, 2007, FMCHES         | 1.1108766          | 1.0175979 1.2127057  |
| Schulze, 2004, NHS II          | 1.0860962          | 0.98820531 1.193684  |
| Combined                       | 1.133824           | 1.0117585 1.2706163  |

**Supplemental Figure 98.** Influence analysis of cruciferous vegetables and type 2 diabetes, dose-response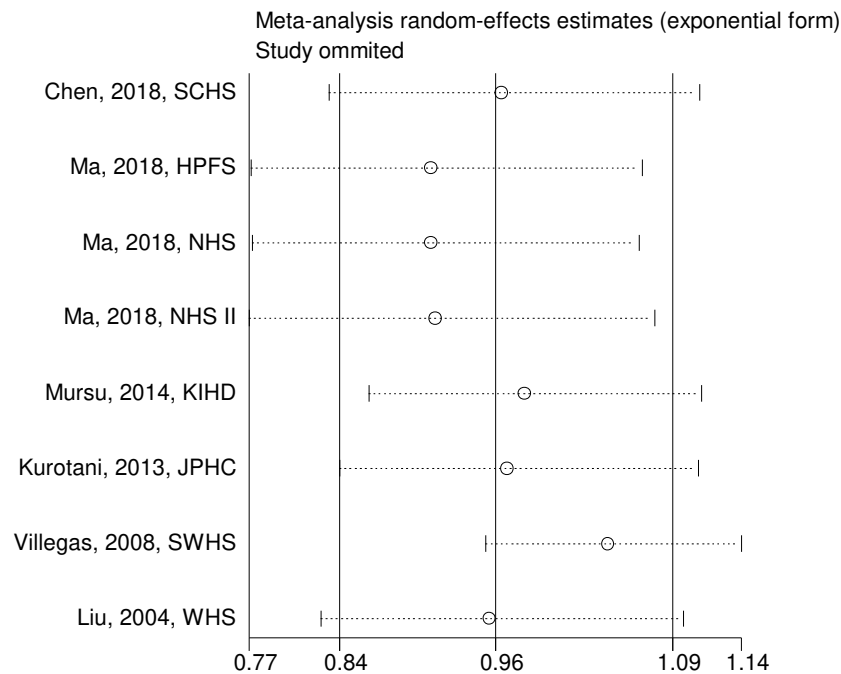

| Study omitted        | e <sup>coef.</sup> | [95% Conf. Interval] |
|----------------------|--------------------|----------------------|
| Chen, 2018, SCHS     | 0.96210164         | 0.8343128 1.1094635  |
| Ma, 2018, HPFS       | 0.91004604         | 0.77629888 1.0668364 |
| Ma, 2018, NHS        | 0.90970498         | 0.77731478 1.0646435 |
| Ma, 2018, NHS II     | 0.91330427         | 0.77489197 1.0764399 |
| Mursu, 2014, KIID    | 0.97963929         | 0.86384547 1.1109545 |
| Kurotani, 2013, JPHC | 0.96639293         | 0.84216845 1.1089413 |
| Villegas, 2008, SWHS | 1.0414906          | 0.95082915 1.1407964 |
| Liu, 2004, WHS       | 0.95329195         | 0.82808661 1.0974281 |
| Combined             | 0.95789886         | 0.84217237 1.0895278 |

**Supplemental Figure 99.** Influence analysis of green leafy vegetables and type 2 diabetes, dose-response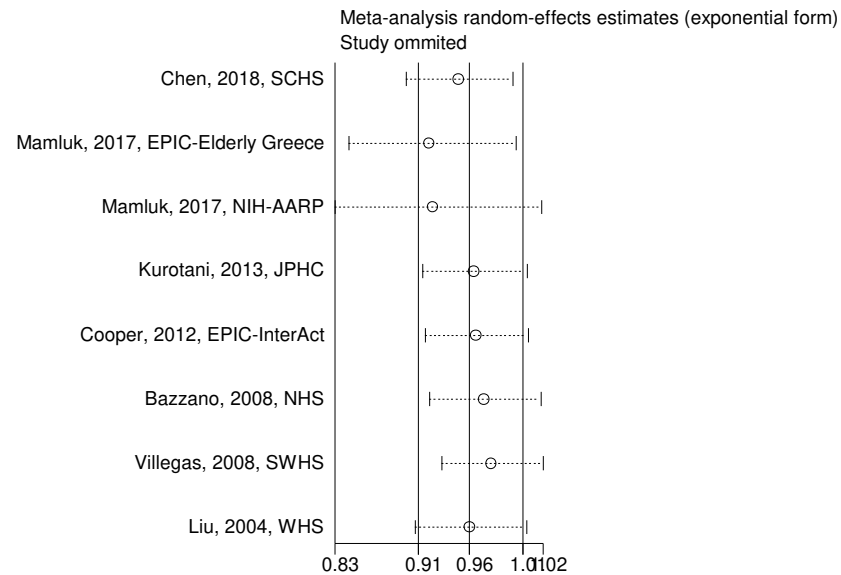

| Study omitted                     | e <sup>coef.</sup> | [95% Conf. Interval]        |
|-----------------------------------|--------------------|-----------------------------|
| Chen, 2018, SCHS                  | 0.94474554         | 0.89619291 0.99592859       |
| Mamluk, 2017, EPIC-Elderly Greece | 0.9175899          | 0.84276497 0.99905813       |
| Mamluk, 2017, NIH-AARP            | 0.92121667         | 0.82982373 1.0226753        |
| Kurotani, 2013, JPHC              | 0.95928353         | 0.91180414 1.0092353        |
| Cooper, 2012, EPIC-InterAct       | 0.96114069         | 0.91443449 1.0102326        |
| Bazzano, 2008, NHS                | 0.96871805         | 0.91820931 1.0220052        |
| Villegas, 2008, SWHS              | 0.97576261         | 0.9295674 1.0242535         |
| Liu, 2004, WHS                    | 0.95545352         | 0.90472227 1.0090294        |
| <b>Combined</b>                   | <b>0.95537042</b>  | <b>0.90770012 1.0055443</b> |



**Supplemental Figure 100.** Influence analysis of potatoes, total and type 2 diabetes, dose-response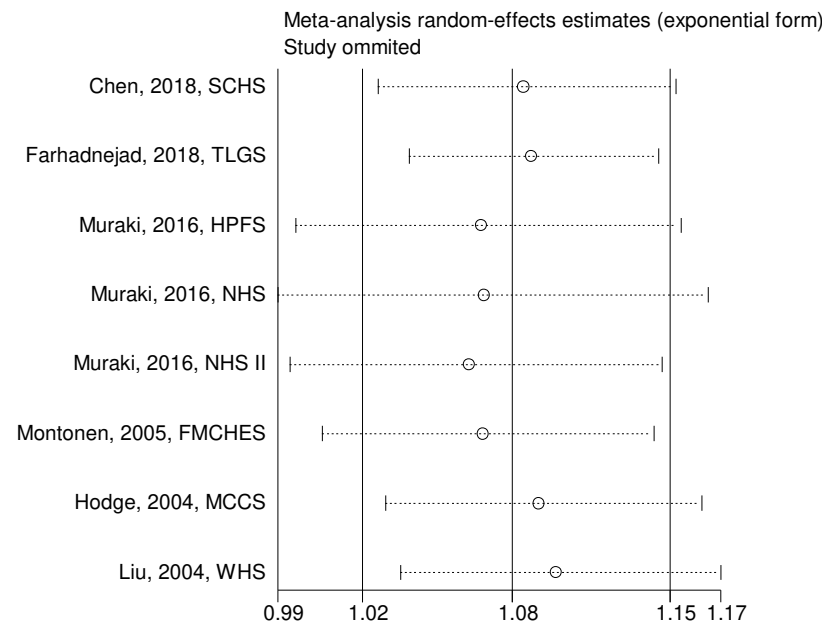

| Study omitted           | e <sup>coef.</sup> | [95% Conf. Interval]       |
|-------------------------|--------------------|----------------------------|
| Chen, 2018, SCHS        | 1.0865777          | 1.0277396 1.1487839        |
| Farhadnejad, 2018, TLGS | 1.089886           | 1.0403271 1.1418056        |
| Muraki, 2016, HPFS      | 1.0696121          | 0.99405956 1.150907        |
| Muraki, 2016, NHS       | 1.0707895          | 0.98676884 1.1619643       |
| Muraki, 2016, NHS II    | 1.064756           | 0.99175006 1.1431361       |
| Montonen, 2005, FMCHES  | 1.0703043          | 1.0049591 1.1398983        |
| Hodge, 2004, MCCS       | 1.093115           | 1.0306273 1.1593915        |
| Liu, 2004, WHS          | 1.0999411          | 1.0366597 1.1670854        |
| <b>Combined</b>         | <b>1.0821336</b>   | <b>1.0213531 1.1465311</b> |

## Funnel plots

**Supplemental Figure 101.** Funnel plot of fruit and vegetables and type 2 diabetes

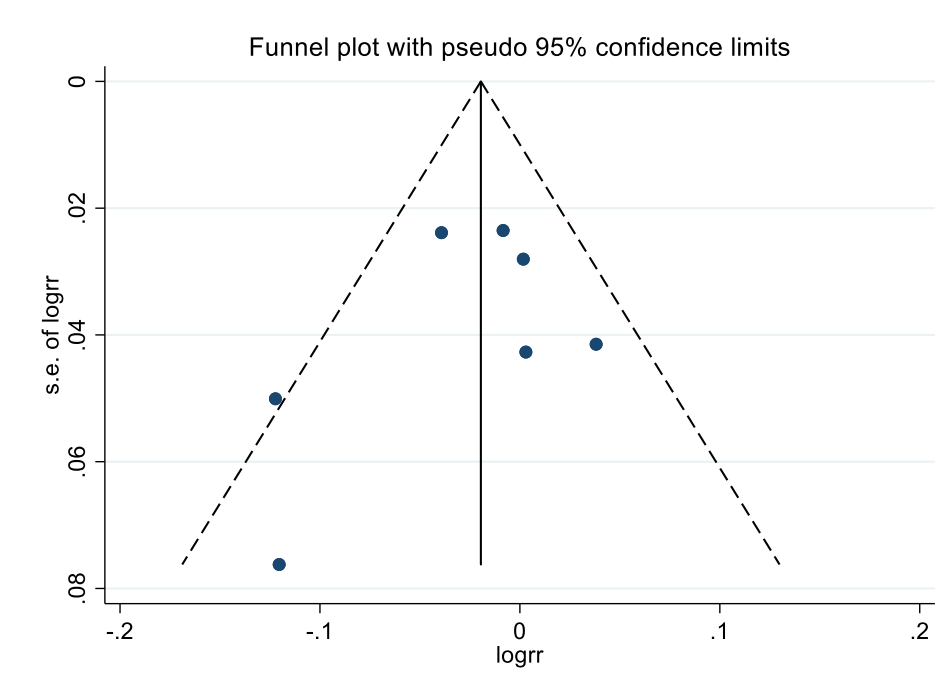

**Supplemental Figure 102.** Funnel plot of fruits and type 2 diabetes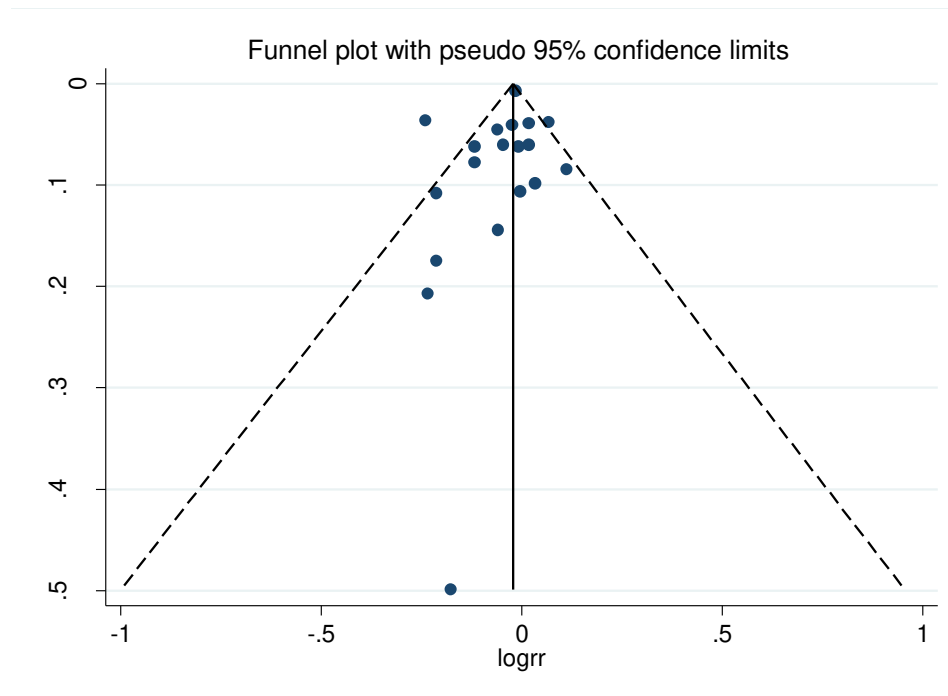

**Supplemental Figure 103.** Funnel plot of vegetables and type 2 diabetes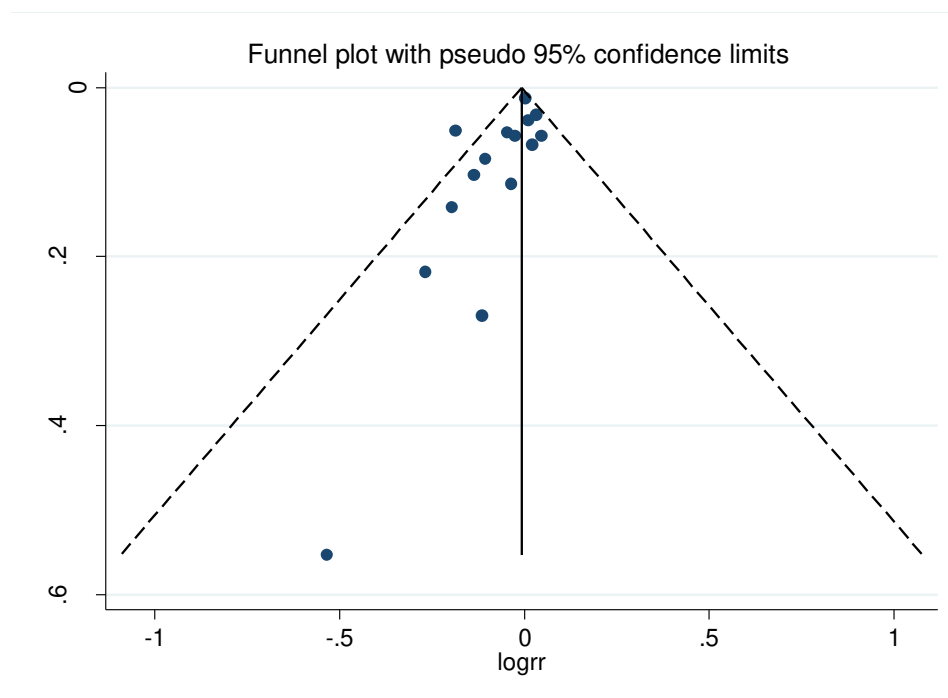

Neither Egger's test (changed from  $p=0.04$  to  $p=0.06$ ) nor the summary estimate (summary RR = 0.97 (0.93-1.01,  $I^2 = 45.6%$ ,  $P = 0.04$ ) changed materially when excluding the study by Hodge et al., which appeared to be an outlier.

**Supplemental Figure 104.** Funnel plot of cruciferous vegetables and type 2 diabetes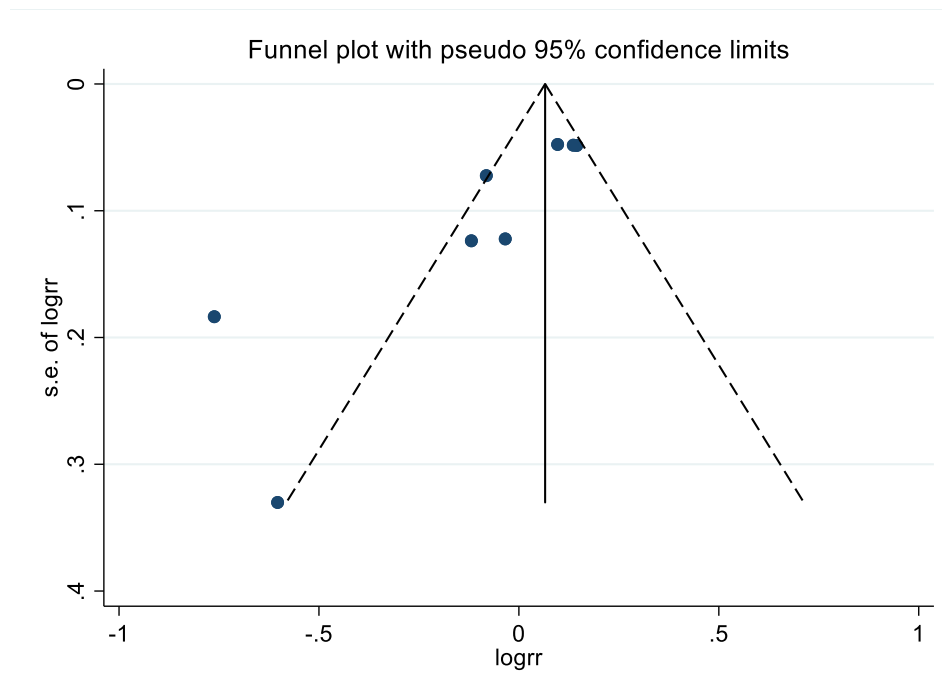

There was evidence of publication bias with Egger's test ( $P = 0.006$ ), which remained significant ( $P = 0.05$ ) after exclusion of two apparently outlying studies (Mursu et al. and Villegas et al.), and the association remained non-significant, summary RR=1.06 (95% CI: 0.98-1.15,  $I^2 = 57\%$ ), although the direction of the association changed.

**Supplemental Figure 105.** Funnel plot of green leafy vegetables and type 2 diabetes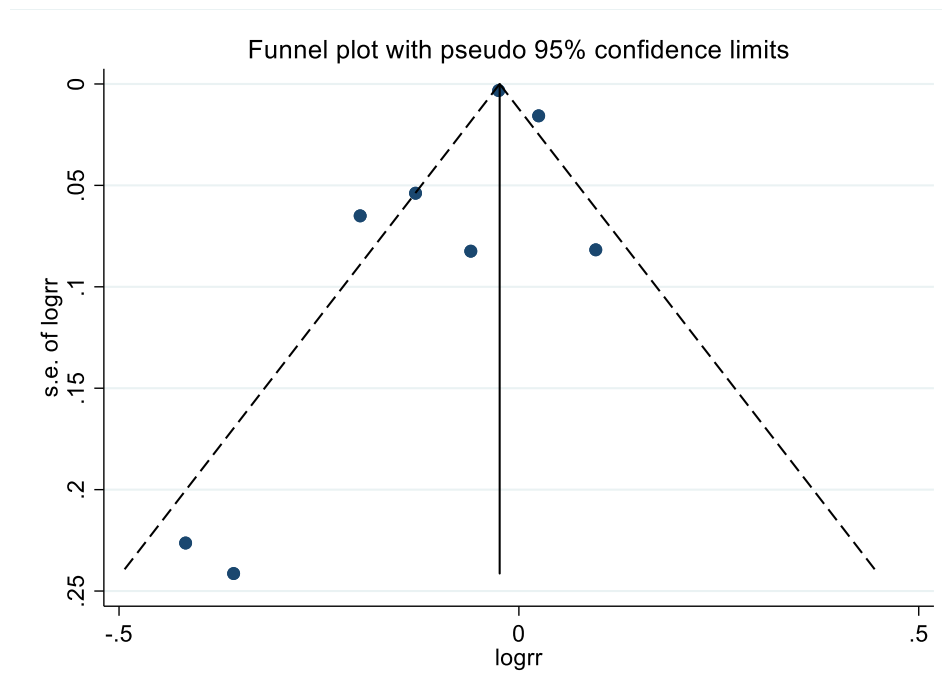

Although Egger's test was not significant ( $P = 0.46$ ), there was some indication of asymmetry in the funnel plot. This appeared to be driven by the studies of Cooper et al. and Kurotani et al. However, the results were not materially altered by exclusion of these two studies, summary RR = 0.96 (95% CI: 0.92-1.01,  $I^2 = 78.4\%$ ).

**Supplemental Figure 106.** Funnel plot of potatoes, total and type 2 diabetes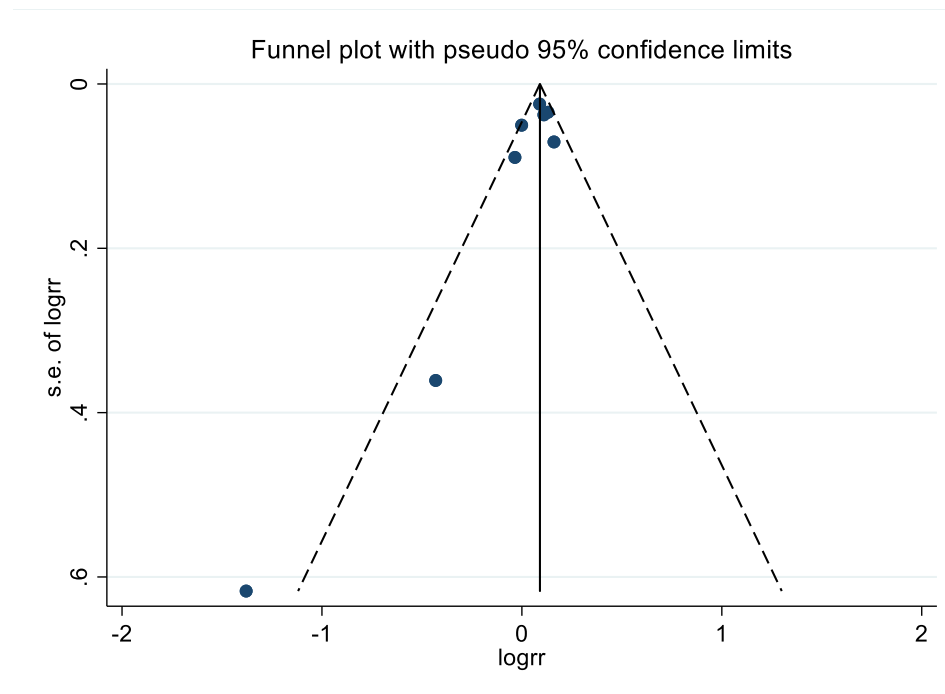

Although there was indication of publication bias with Egger's test ( $P = 0.06$ ) and by inspection of the funnel plot, the asymmetry in the funnel plot indicated missing positive studies. Excluding one outlying study by Farhadnejad et al. attenuated Egger's test to 0.23, but did not substantially alter the results, summary RR = 1.09 (95% CI: 1.04-1.14,  $I^2 = 40.2\%$ ,  $P = 0.12$ ).
